# Supplementary material for: A Systematic Analysis on DNA Methylation and the Expression of Both mRNA and microRNA in Bladder Cancer
Source: PLoS One. 2011 Nov 30;6(11):e28223. doi: 10.1371/journal.pone.0028223 (PMC3227661; doi:10.1371/journal.pone.0028223)
Supplement: Table S7 — Enriched GO terms and KEGG pathways in differentially expressed genes in bladder cancer. (XLS) [file pone.0028223.s007.xls]

## Sheet: Sheet1
Table S7. Enriched GO terms and KEGG pathways in differentially expressed genes in bladder cancer
GOID	Ontology Source	GOTerm	Nr. Genes	% Associated Genes	Term PValue	Term PValue Corrected with Benjamini-Hochberg	Associated Genes Found	All Associated Genes	Cluster1 Genes	Cluster2 Genes	% Cluster1 Gene	% Cluster2 Gene
GO:0072358	GO_BiologicalProcess_16.11.2010_17h17	cardiovascular system development	120	27.5229	1.52671e-09	7.83204e-07	[ACTC1, ACVR1, ACVRL1, ADAMTS1, ALDH1A2, ANG, ANGPT1, ARHGAP24, ATM, BBS4, BMP4, CASP3, CASQ2, CCNB1, CDC2, CEACAM1, CHD7, COL15A1, COL1A2, COL3A1, COL8A2, CPE, CTGF, CXCL17, CYR61, DHCR7, ECE2, EDNRA, ENPEP, ERBB2, ERBB3, EREG, FBN1, FGF13, FGF9, FGFR1, FHL2, FIGF, FN1, FOXJ1, FOXP1, FZD4, GATA6, GLI2, GNAQ, HAND1, HAND2, HHEX, HOXA13, HOXB3, HSPG2, ID1, ID3, IGF1, IHH, IRX4, ITGA5, ITGA7, JUN, …	[AAMP, ACTC1, ACVR1, ACVR2B, ACVRL1, ADAM15, ADAMTS1, ADAP2, ADIPOR2, ADM, ADRA1B, ADRA2B, ADRBK1, AGGF1, AGXT, AKT1, ALDH1A2, ALPK3, AMOT, ANG, ANGPT1, ANGPTL3, ANGPTL6, ANPEP, ANXA2, ANXA2P2, APOB, APOE, APOLD1, ARHGAP22, ARHGAP24, ATG5, ATM, ATP5B, ATP7A, ATPIF1, B4GALT1, BAZ1B, BBS4, BBS5, BBS7, BCOR, BMP10, BMP2, BMP4, BMPER, BMPR1A, C1GALT1, C2CD3, CALCA, CALCRL, CASP3, CASP7, CASP8, CASQ2,…	[CASP3, CCNB1, CDC2, CEACAM1, CHD7, CXCL17, DHCR7, ECE2, ERBB2, ERBB3, EREG, FOXJ1, HOXB3, ID1, IHH, IRX4, JUP, KLF5, LY6E, MMP14, NSDHL, PLAU, POU5F1, PRKDC, S100A7, SGPL1, SMAD3, SOX4, SPINT1, SRPX2, TBX1, TH, TYMP, VANGL2, VAV2, VAV3, VEGFA]	[ACTC1, ACVR1, ACVRL1, ADAMTS1, ALDH1A2, ANG, ANGPT1, ARHGAP24, ATM, BBS4, BMP4, CASQ2, COL15A1, COL1A2, COL3A1, COL8A2, CPE, CTGF, CYR61, EDNRA, ENPEP, FBN1, FGF13, FGF9, FGFR1, FHL2, FIGF, FN1, FOXP1, FZD4, GATA6, GLI2, GNAQ, HAND1, HAND2, HHEX, HOXA13, HSPG2, ID3, IGF1, ITGA5, ITGA7, JUN, KCNJ8, LAMA4, MEOX2, MPZ, MSX2, MYH11, NOTCH4, NRP2, OBSL1, PDLIM3, PKD1, PKD2, PLN, PPAP2B, PRRX1, PTCH1,…	30.8333	69.1667	Specific for Cluster 2
GO:0030855	GO_BiologicalProcess_16.11.2010_17h17	epithelial cell differentiation	59	34.3023	5.75834e-09	1.47701e-06	[BMP4, C19orf46, CASP3, CLIC4, CNFN, CSTA, CTNND1, DHRS9, EHF, EPB41L5, EREG, ESR1, EVPL, F11R, FGF13, FOXA1, FOXA2, FOXJ1, FZD1, FZD7, GATA5, GATA6, GSTM3, HOXA13, HOXB5, ID1, ID3, IGF1, IHH, IRF6, IVL, JUN, KRT14, KRT4, NOTCH4, ONECUT2, PGR, POU3F1, PTCH1, RHCG, S100A7, SFN, SIX1, SIX2, SOX17, SOX18, SPRR1A, SPRR1B, SPRR2D, SPRR2E, SPRR2F, SPRR3, TCF21, TGFB1I1, TGM1, TP63, UPK1A, VEGFA, WDR77]	[ADAM9, AGPAT6, AGXT, ANXA1, AREG, ASCL1, B4GALT1, BARX1, BASP1, BMP4, BMP7, C19orf46, CASP3, CD63, CDSN, CEBPB, CITED1, CLIC4, CNFN, COL18A1, COL4A1, CSTA, CTNNB1, CTNND1, DHRS9, DLX5, DLX6, DMBT1, DSPP, E2F4, EDF1, EHF, ELF3, ELF5, EMP1, ENG, EPB41L5, EREG, ESR1, ESR2, EVPL, EZR, F11R, FEM1B, FGF10, FGF13, FLG, FOXA1, FOXA2, FOXJ1, FOXN1, FZD1, FZD2, FZD7, GATA4, GATA5, GATA6, GDF7, GDNF, GJA1,…	[C19orf46, CASP3, CNFN, CSTA, CTNND1, DHRS9, EHF, EREG, EVPL, F11R, FOXA1, FOXA2, FOXJ1, GSTM3, HOXB5, ID1, IHH, IRF6, IVL, KRT14, KRT4, ONECUT2, POU3F1, RHCG, S100A7, SFN, SIX1, SIX2, SPRR1A, SPRR1B, SPRR2D, SPRR2E, SPRR2F, SPRR3, TGM1, TP63, VEGFA, WDR77]	[BMP4, CLIC4, EPB41L5, ESR1, FGF13, FZD1, FZD7, GATA5, GATA6, HOXA13, ID3, IGF1, JUN, NOTCH4, PGR, PTCH1, SOX17, SOX18, TCF21, TGFB1I1, UPK1A]	64.4068	35.5932	Common
GO:0007010	GO_BiologicalProcess_16.11.2010_17h17	cytoskeleton organization	117	26.4706	2.75548e-08	3.5339e-06	[ABL1, ACTC1, ADRA2A, ANG, ANLN, ANTXR1, AQP1, ARHGAP10, ARRB1, AURKA, BBS4, BCL2, BUB1B, CALD1, CAPZA1, CDC42, CDC42BPG, CDC42EP2, CENPA, CKS2, CNN1, CNN2, CRYAB, CXCL1, DAAM2, DES, DIAPH2, DIAPH3, DSTN, EHD2, ELMO1, EPB41L2, ESPL1, ESPN, FBXO5, FERMT2, FGF7, FHDC1, FHL3, FLNA, FOXJ1, FSCN1, GABARAP, GAS7, GSN, GZMB, HOOK1, INA, JUP, KIAA1543, KIF11, KIF18A, KIF23, KIF2A, KIF2C, KRT14, KRT19, KR…	[ABI1, ABI2, ABL1, ABLIM1, ABLIM2, ABLIM3, ACTA1, ACTC1, ACTN4, ADD1, ADD2, ADRA2A, AIF1, ALDOA, AMOT, ANG, ANK1, ANLN, ANTXR1, APOE, AQP1, AQP2, ARAP1, ARAP3, ARF6, ARFIP2, ARHGAP10, ARHGAP17, ARHGAP26, ARHGAP4, ARHGAP6, ARHGDIB, ARHGEF11, ARHGEF17, ARHGEF18, ARHGEF2, ARPC1A, ARPC4, ARPC5, ARRB1, ATP2C1, AURKA, AVIL, AXIN1, BAX, BBS2, BBS4, BCAR1, BCL2, BCL6, BFSP2, BIN3, BLOC1S2, BMP10, BRCA2, …	[ANLN, AURKA, BUB1B, CAPZA1, CDC42, CDC42BPG, CENPA, CKS2, CNN2, CXCL1, DIAPH3, ESPL1, ESPN, FBXO5, FHDC1, FOXJ1, FSCN1, GZMB, HOOK1, INA, JUP, KIAA1543, KIF11, KIF18A, KIF23, KIF2A, KIF2C, KRT14, KRT19, KRT20, KRT4, KRT6A, KRT7, MAP7, NDC80, NEK2, NPM1, NUSAP1, PLEK2, PPP4C, PRC1, PRKCZ, PRSS8, RACGAP1, SAC3D1, SGOL1, SHROOM2, SIPA1L1, SPAG5, STMN1, TACC3, TEKT1, TTK, VILL, ZWINT]	[ABL1, ACTC1, ADRA2A, ANG, ANTXR1, AQP1, ARHGAP10, ARRB1, BBS4, BCL2, CALD1, CDC42EP2, CNN1, CRYAB, DAAM2, DES, DIAPH2, DSTN, EHD2, ELMO1, EPB41L2, FERMT2, FGF7, FHL3, FLNA, GABARAP, GAS7, GSN, MAP1B, MAPT, MICAL1, MLH1, MRAS, MYH11, NCKAP1L, OBSL1, PALLD, PALM, PARVA, PDLIM3, PDLIM7, PKN1, RHOJ, RND1, ROCK2, SDCBP, SGCB, SGCD, SGCG, SORBS1, SRF, SVIL, SYNE1, SYNM, TLN2, TMOD1, TNNT2, TPM1, UNC84…	47.0085	52.9915	Common
GO:0010564	GO_BiologicalProcess_16.11.2010_17h17	regulation of cell cycle process	69	31.2217	2.56134e-08	4.37989e-06	[ANAPC10, ANLN, ANTXR1, APBB1, ATM, AXIN2, BIRC5, BMP4, BRCC3, BUB1, BUB1B, C13orf34, CCNA2, CCNB1, CCND1, CCNE2, CDC2, CDC25C, CDC45L, CDC6, CDC7, CDKN2B, CDT1, CENPE, CENPF, CHEK1, CTGF, DCUN1D3, DGKZ, DTL, EREG, ESPL1, FAM175A, FBXO5, FOXN3, GAS1, HOXA13, HRAS, IGF1, IL1B, KNTC1, MAD2L1, MSH2, NEK2, NPM1, NUSAP1, PKIA, PKMYT1, PLK1, PLK4, PRMT5, RBM38, RECQL4, RFWD3, RINT1, ROCK2, RRAD, S100A9…	[ANAPC10, ANLN, ANTXR1, APBB1, APBB2, APC, ARTN, ATM, ATRIP, AURKAIP1, AXIN2, BCL6, BIRC5, BLM, BMP4, BMP7, BRCA1, BRCA2, BRCC3, BRE, BRIP1, BRSK1, BTC, BUB1, BUB1B, BUB3, C13orf34, CALR, CASC5, CAV2, CCNA2, CCNB1, CCND1, CCNE2, CCNF, CCNG1, CCNG2, CD28, CDC14B, CDC16, CDC2, CDC23, CDC25C, CDC45L, CDC6, CDC7, CDKN2A, CDKN2B, CDT1, CENPE, CENPF, CEP63, CEP76, CHEK1, CHEK2, CHFR, CHMP1A, CLSPN, CRE…	[ANAPC10, ANLN, BIRC5, BRCC3, BUB1, BUB1B, C13orf34, CCNA2, CCNB1, CCND1, CCNE2, CDC2, CDC25C, CDC45L, CDC6, CDC7, CDT1, CENPE, CENPF, CHEK1, DGKZ, DTL, EREG, ESPL1, FBXO5, HRAS, KNTC1, MAD2L1, MSH2, NEK2, NPM1, NUSAP1, PKIA, PKMYT1, PLK1, PLK4, PRMT5, RECQL4, RFWD3, S100A9, TGFA, TIMELESS, TP53, TP63, TP73, TPX2, TTK, UBD, ZWILCH, ZWINT]	[ANTXR1, APBB1, ATM, AXIN2, BMP4, CDKN2B, CTGF, DCUN1D3, FAM175A, FOXN3, GAS1, HOXA13, IGF1, IL1B, RBM38, RINT1, ROCK2, RRAD, ZAK]	72.4638	27.5362	Specific for Cluster 1
GO:0009887	GO_BiologicalProcess_16.11.2010_17h17	organ morphogenesis	139	24.8214	1.02888e-07	1.05563e-05	[ACTC1, ADAMTS1, ALDH1A2, ANGPT1, ANGPT2, AQP1, ARID5B, AXIN2, AXL, BARX2, BBS4, BCL2, BCL2L11, BMP4, BMP6, CA2, CCL2, CCNA2, CCND1, CCNE1, CDC2, CFH, CHD7, COASY, COL1A2, COL8A2, CPE, CTGF, CTSH, DCN, DSCAML1, ELN, ERBB3, EREG, ESR1, EYA1, FGF13, FGF7, FGF9, FGFR1, FHL2, FOXA1, FOXA2, FOXJ1, GAS1, GATA6, GHR, GJB6, GLI2, GMNN, HAND1, HAND2, HEY1, HHEX, HOXA11, HOXA13, HOXB3, HOXB4, HOXB5, HOXB6,…	[ABLIM1, ACP5, ACTC1, ACVR2B, ADAMTS1, ADM, AES, ALDH1A2, ALDH1A3, ALDOC, ALMS1, ALPL, ALX1, ALX3, ALX4, AMBN, AMELX, AMTN, ANGPT1, ANGPT2, ANKRD11, ANXA3, APLP1, APOA5, APOH, AQP1, AQP3, AQP5, AQP6, AREG, ARID5B, ATIC, ATOH1, ATP7A, AXIN1, AXIN2, AXL, BARX2, BAZ1B, BBS2, BBS4, BBS5, BBS7, BCL2, BCL2L11, BCOR, BGLAP, BMP1, BMP10, BMP2, BMP4, BMP6, BMP7, BMPR1A, BMPR1B, BRAF, BSG, C15orf31, C2CD3,…	[ANGPT2, BARX2, BCL2L11, CA2, CCNA2, CCND1, CCNE1, CDC2, CHD7, COASY, CTSH, ERBB3, EREG, FOXA1, FOXA2, FOXJ1, GJB6, GMNN, HEY1, HOXB3, HOXB4, HOXB5, HOXB6, HOXB7, HOXB8, HOXC13, HRAS, ID1, IHH, INHBA, IRX5, ITGA2, ITGA6, JAG2, KRT13, LY6E, MDFI, NTF4, ONECUT2, POU2F1, PTPRU, PVRL1, RECQL4, SDC1, SGPL1, SHROOM2, SIX1, SIX2, SIX4, SMAD3, SOX2, TBX1, TFAP2A, TGM1, TH, TNNC1, TP63, VANGL2, VEGFA, WNT…	[ACTC1, ADAMTS1, ALDH1A2, ANGPT1, AQP1, ARID5B, AXIN2, AXL, BBS4, BCL2, BMP4, BMP6, CCL2, CFH, COL1A2, COL8A2, CPE, CTGF, DCN, DSCAML1, ELN, ESR1, EYA1, FGF13, FGF7, FGF9, FGFR1, FHL2, GAS1, GATA6, GHR, GLI2, HAND1, HAND2, HHEX, HOXA11, HOXA13, ID3, IGF1, MEF2D, MGP, MSX2, NAB1, NAB2, NOTCH2, NR4A3, OSR2, PBX1, PDGFRB, PITX2, PKD1, PKD2, PRRX1, PTCH1, RBP4, RORA, SFRP2, SLIT3, SMAD7, SMARCD3, SNA…	43.1655	56.8345	Common
GO:0007517	GO_BiologicalProcess_16.11.2010_17h17	muscle organ development	59	31.7204	1.40133e-07	1.19814e-05	[ACTC1, AEBP1, AGRN, ARID5B, BVES, CACNA1H, CACNB2, CENPF, CFH, CHODL, COL19A1, CRYAB, CTF1, CXCL10, DCN, EGR3, ERBB2, ERBB3, FHL3, FOXP1, HAND1, IGF1, IGFBP5, ITGA11, ITGA7, ITGB1BP2, LAMA2, LY6E, MBNL1, MEF2C, MEF2D, MEOX2, MKX, MNX1, MRAS, MYH3, MYL6, PAX7, RCAN1, SGCA, SGCB, SGCD, SGCE, SGCG, SIX1, SIX4, SMAD7, SMTN, SNTA1, SPEG, SRPK3, SVIL, TAGLN, TAGLN2, TGFBR3, TNNC1, TNNT2, TPM1, TWIST1]	[ACHE, ACTA1, ACTC1, AEBP1, AFG3L2, AGRN, ALS2, ALX4, ANKRD2, APP, ARID5B, BMP10, BMP2, BVES, CACNA1H, CACNA1S, CACNB2, CACNB4, CACNG2, CAPN3, CAV1, CAV2, CAV3, CD164, CDK5, CENPF, CFH, CHAT, CHKB, CHODL, CHRNA1, CHRND, CNTF, COL19A1, COL6A3, CRYAB, CSRP3, CTF1, CTSB, CXCL10, DCN, DMD, DNAJA3, DNER, DVL1, EGLN1, EGR3, EID2, EID2B, EMD, EP300, ERBB2, ERBB3, EVC, F2R, FAM65B, FGFRL1, FHL3, FKBP1A, …	[AGRN, CENPF, CXCL10, ERBB2, ERBB3, LY6E, MNX1, PAX7, SIX1, SIX4, TAGLN2, TNNC1]	[ACTC1, AEBP1, ARID5B, BVES, CACNA1H, CACNB2, CFH, CHODL, COL19A1, CRYAB, CTF1, DCN, EGR3, FHL3, FOXP1, HAND1, IGF1, IGFBP5, ITGA11, ITGA7, ITGB1BP2, LAMA2, MBNL1, MEF2C, MEF2D, MEOX2, MKX, MRAS, MYH3, MYL6, RCAN1, SGCA, SGCB, SGCD, SGCE, SGCG, SMAD7, SMTN, SNTA1, SPEG, SRPK3, SVIL, TAGLN, TGFBR3, TNNT2, TPM1, TWIST1]	20.339	79.661	Specific for Cluster 2
GO:2000145	GO_BiologicalProcess_16.11.2010_17h17	regulation of cell motility	67	29.7778	2.99109e-07	2.19204e-05	[ACVRL1, ADRA2A, ALOX12, ANGPT1, ANGPT2, BBS4, BCL2, BDKRB1, BMP4, C5, CCL11, CHRD, CLIC4, CREB3L4, CTSH, CXCL10, CXCL12, EDN2, EPB41L5, FAM110A, FGF13, FGF7, FIGF, FURIN, ICAM1, IGF1, IGFBP3, IGFBP5, ILK, ITGA2, JAG2, LAMA2, LAMA4, MMP9, NCKAP1L, NEXN, NTN1, ONECUT2, P2RY2, P2RY6, PDGFRB, PLAU, PODN, PPAP2B, PTPRU, RBPJ, ROBO4, RORA, RRAS, RTN4, S100A7, SELE, SFRP2, SLIT2, SMAD3, SMAD7, SNAI1, S…	[AAMP, ABHD2, ABI3, ACE, ACVRL1, ADA, ADAM10, ADAM17, ADAM9, ADORA1, ADRA2A, AGTR2, AGXT, AKT1, AKT2, ALOX12, ALOX15B, AMOT, ANGPT1, ANGPT2, ANGPT4, ANGPTL3, ANXA3, APC, APOE, APOH, ARAP3, ARHGAP5, BBS2, BBS4, BCAR1, BCL2, BDKRB1, BMP10, BMP4, BMPER, BMPR2, C3AR1, C5, C5AR1, CBLL1, CCL11, CCL24, CCL26, CD63, CDH13, CDK5, CHRD, CITED2, CLIC4, COL18A1, COL1A1, CORO1A, CREB3L4, CSF1, CTSH, CXCL10, C…	[ALOX12, ANGPT2, CREB3L4, CTSH, CXCL10, EDN2, FAM110A, FURIN, IGFBP3, ITGA2, JAG2, MMP9, ONECUT2, P2RY2, P2RY6, PLAU, PTPRU, S100A7, SMAD3, SRPX2, TAC1, TLR2, VEGFA]	[ACVRL1, ADRA2A, ANGPT1, BBS4, BCL2, BDKRB1, BMP4, C5, CCL11, CHRD, CLIC4, CXCL12, EPB41L5, FGF13, FGF7, FIGF, ICAM1, IGF1, IGFBP5, ILK, LAMA2, LAMA4, NCKAP1L, NEXN, NTN1, PDGFRB, PODN, PPAP2B, RBPJ, ROBO4, RORA, RRAS, RTN4, SELE, SFRP2, SLIT2, SMAD7, SNAI1, TBX5, THBS1, THBS4, TPM1, VCL, VEGFB]	34.3284	65.6716	Common
GO:0030334	GO_BiologicalProcess_16.11.2010_17h17	regulation of cell migration	66	29.7297	3.90439e-07	2.50369e-05	[ACVRL1, ADRA2A, ALOX12, ANGPT1, ANGPT2, BCL2, BDKRB1, BMP4, C5, CCL11, CHRD, CLIC4, CREB3L4, CTSH, CXCL10, CXCL12, EDN2, EPB41L5, FAM110A, FGF13, FGF7, FIGF, FURIN, ICAM1, IGF1, IGFBP3, IGFBP5, ILK, ITGA2, JAG2, LAMA2, LAMA4, MMP9, NCKAP1L, NEXN, NTN1, ONECUT2, P2RY2, P2RY6, PDGFRB, PLAU, PODN, PPAP2B, PTPRU, RBPJ, ROBO4, RORA, RRAS, RTN4, S100A7, SELE, SFRP2, SLIT2, SMAD3, SMAD7, SNAI1, SRPX2, …	[AAMP, ABHD2, ABI3, ACE, ACVRL1, ADA, ADAM10, ADAM17, ADAM9, ADORA1, ADRA2A, AGTR2, AGXT, AKT1, AKT2, ALOX12, ALOX15B, AMOT, ANGPT1, ANGPT2, ANGPT4, ANGPTL3, ANXA3, APC, APOE, APOH, ARAP3, ARHGAP5, BCAR1, BCL2, BDKRB1, BMP10, BMP4, BMPER, BMPR2, C3AR1, C5, C5AR1, CBLL1, CCL11, CCL24, CCL26, CD63, CDH13, CDK5, CHRD, CITED2, CLIC4, COL18A1, COL1A1, CORO1A, CREB3L4, CSF1, CTSH, CXCL10, CXCL12, CXCL1…	[ALOX12, ANGPT2, CREB3L4, CTSH, CXCL10, EDN2, FAM110A, FURIN, IGFBP3, ITGA2, JAG2, MMP9, ONECUT2, P2RY2, P2RY6, PLAU, PTPRU, S100A7, SMAD3, SRPX2, TAC1, TLR2, VEGFA]	[ACVRL1, ADRA2A, ANGPT1, BCL2, BDKRB1, BMP4, C5, CCL11, CHRD, CLIC4, CXCL12, EPB41L5, FGF13, FGF7, FIGF, ICAM1, IGF1, IGFBP5, ILK, LAMA2, LAMA4, NCKAP1L, NEXN, NTN1, PDGFRB, PODN, PPAP2B, RBPJ, ROBO4, RORA, RRAS, RTN4, SELE, SFRP2, SLIT2, SMAD7, SNAI1, TBX5, THBS1, THBS4, TPM1, VCL, VEGFB]	34.8485	65.1515	Common
GO:0008285	GO_BiologicalProcess_16.11.2010_17h17	negative regulation of cell proliferation	100	26.0417	6.469e-07	3.68733e-05	[ACVRL1, ADAMTS1, ADAMTS8, ADORA2B, ALDH1A2, ANG, ASCL2, ATM, AXIN2, AZGP1, BCL11B, BCL2, BDKRB2, BDNF, BMP4, BTG2, CASP3, CDC6, CDKN2B, CDKN3, CHEK1, COL4A3, COMT, CSK, CXCL1, DHCR24, DPT, E2F7, EMP3, ERBB2, EREG, ETV4, FABP6, FGF13, FGFBP1, FOXJ1, GAL, GAS1, GJB6, HDAC4, HRAS, IGF1, IGFBP3, IGFBP5, IGFBP6, IL1B, ILK, INDO, INHBA, IRF6, JUN, KAT2B, KLF10, KLF4, KRT4, LDOC1, MSX2, MUC1, MXI1, NDN…	[ABI1, ACVRL1, ADAMTS1, ADAMTS8, ADM, ADORA1, ADORA2A, ADORA2B, ADRA1A, AGXT, AIF1, ALDH1A2, ALOX15B, ANG, APC, APOE, APOH, AREG, ASCL2, ASPH, ATM, ATP5A1, ATP8A2, ATPIF1, AXIN2, AZGP1, B4GALT1, B4GALT7, BAI1, BCL11B, BCL2, BCL6, BDKRB2, BDNF, BECN1, BMP2, BMP4, BMP7, BNIPL, BRCA2, BTG1, BTG2, BTG3, BTG4, BTLA, CASP3, CAV1, CAV2, CBLB, CCL23, CCL3L1, CD164, CD274, CD276, CD33, CDC6, CDH13, CDH5, …	[ADORA2B, ASCL2, AZGP1, BCL11B, CASP3, CDC6, CDKN3, CHEK1, COMT, CSK, CXCL1, DHCR24, E2F7, ERBB2, EREG, ETV4, FABP6, FGFBP1, FOXJ1, GAL, GJB6, HRAS, IGFBP3, INDO, INHBA, IRF6, KRT4, MUC1, NME1, NPM1, PTHLH, PTPRU, S100A11, SCGB1A1, SFN, SMAD3, SOX2, TOB1, TP53, TRIM24, WDR77]	[ACVRL1, ADAMTS1, ADAMTS8, ALDH1A2, ANG, ATM, AXIN2, BCL2, BDKRB2, BDNF, BMP4, BTG2, CDKN2B, COL4A3, DPT, EMP3, FGF13, GAS1, HDAC4, IGF1, IGFBP5, IGFBP6, IL1B, ILK, JUN, KAT2B, KLF10, KLF4, LDOC1, MSX2, MXI1, NDN, NOTCH2, PODN, PTCH1, RBM38, RBP4, RERG, RORA, SERPINF1, SFRP2, SFRP4, SLIT2, SLIT3, SPEG, SSTR1, TBX5, TENC1, TGFB1I1, TGFB3, TGFBR3, THBS1, TIMP2, TSC2, VSIG4, WFDC1, WISP2, ZBTB16, ZE…	41	59	Common
GO:0002009	GO_BiologicalProcess_16.11.2010_17h17	morphogenesis of an epithelium	67	29.1304	7.24993e-07	3.71921e-05	[ACVR1, ALDH1A2, BBS4, BCL2, BMP4, C19orf46, CA2, CA9, CCL11, CELSR1, CTNND1, CTSH, EDNRA, EPB41L5, ESR1, EYA1, FGF13, FGF7, FGFR1, FOXA1, FOXA2, FOXJ1, FREM2, GLI2, HAND1, HAND2, HHEX, HOXA11, HOXA13, HOXB4, IGF1, IHH, ILK, JAG2, JUP, NOTCH2, NOTCH4, NTN1, PBX1, PGR, PTCH1, SFRP2, SIX1, SIX2, SLIT2, SMAD3, SOX17, SOX18, SOX2, SPINT1, SRF, TBX5, TCF21, TFAP2A, TGFB1I1, TGM2, TIMELESS, TNNC1, TP63…	[ACVR1, ADM, AGXT, ALDH1A2, ALDH1A3, ALX1, APAF1, AREG, BBS4, BBS5, BBS7, BCL10, BCL2, BMP2, BMP4, BMP7, BTRC, C19orf46, C2CD3, CA2, CA9, CASP8, CCL11, CD44, CELSR1, CHUK, CITED1, COQ7, CRYGS, CSF1, CTNNB1, CTNNBIP1, CTNND1, CTSH, CTSZ, CYP7B1, DAG1, DEAF1, DLEC1, DVL2, EDN1, EDNRA, EGFR, ENG, EPB41L5, ESR1, ESR2, EYA1, FEM1B, FGF10, FGF13, FGF7, FGFR1, FLT1, FOXA1, FOXA2, FOXC2, FOXD1, FOXD2, FO…	[C19orf46, CA2, CA9, CELSR1, CTNND1, CTSH, FOXA1, FOXA2, FOXJ1, FREM2, HOXB4, IHH, JAG2, JUP, SIX1, SIX2, SMAD3, SOX2, SPINT1, TFAP2A, TIMELESS, TNNC1, TP63, VANGL2, VEGFA, ZIC2]	[ACVR1, ALDH1A2, BBS4, BCL2, BMP4, CCL11, EDNRA, EPB41L5, ESR1, EYA1, FGF13, FGF7, FGFR1, GLI2, HAND1, HAND2, HHEX, HOXA11, HOXA13, IGF1, ILK, NOTCH2, NOTCH4, NTN1, PBX1, PGR, PTCH1, SFRP2, SLIT2, SOX17, SOX18, SRF, TBX5, TCF21, TGFB1I1, TGM2, TSC2, TWIST1, VASP, VCL, ZEB2]	38.806	61.194	Common
GO:0001525	GO_BiologicalProcess_16.11.2010_17h17	angiogenesis	50	32.0513	8.71544e-07	3.72585e-05	[ACVR1, ACVRL1, ANG, ANGPT1, ARHGAP24, BMP4, CEACAM1, COL15A1, COL8A2, CTGF, CXCL17, CYR61, EDNRA, ENPEP, EREG, FGF13, FGF9, FGFR1, FIGF, FN1, HAND1, HAND2, HOXB3, HSPG2, ID1, IHH, ITGA5, JUN, KLF5, MEOX2, MMP14, NOTCH4, PLAU, RBPJ, ROBO4, RTN4, S100A7, SFRP2, SLIT2, SOX17, SOX18, SRF, SRPX2, THBS1, TNFRSF12A, TYMP, VAV2, VAV3, VEGFA, WASF2]	[AAMP, ACVR1, ACVRL1, ADAM15, ADRA2B, ANG, ANGPT1, ANGPTL6, ANPEP, ANXA2, ANXA2P2, APOLD1, ARHGAP22, ARHGAP24, ATP5B, ATPIF1, B4GALT1, BMP4, BMPER, C1GALT1, CASP8, CCBE1, CDH13, CEACAM1, COL15A1, COL18A1, COL4A1, COL8A1, COL8A2, CSPG4, CTGF, CTNNB1, CX3CL1, CXCL17, CYR61, DICER1, DLL4, EDN1, EDNRA, EGF, EGFL7, ELK3, ENG, ENPEP, EPAS1, EPGN, ERAP1, EREG, FGF1, FGF10, FGF13, FGF18, FGF6, FGF9, FGFR…	[CEACAM1, CXCL17, EREG, HOXB3, ID1, IHH, KLF5, MMP14, PLAU, S100A7, SRPX2, TYMP, VAV2, VAV3, VEGFA]	[ACVR1, ACVRL1, ANG, ANGPT1, ARHGAP24, BMP4, COL15A1, COL8A2, CTGF, CYR61, EDNRA, ENPEP, FGF13, FGF9, FGFR1, FIGF, FN1, HAND1, HAND2, HSPG2, ITGA5, JUN, MEOX2, NOTCH4, RBPJ, ROBO4, RTN4, SFRP2, SLIT2, SOX17, SOX18, SRF, THBS1, TNFRSF12A, WASF2]	30	70	Specific for Cluster 2
GO:0000075	GO_BiologicalProcess_16.11.2010_17h17	cell cycle checkpoint	38	35.8491	8.24409e-07	3.84474e-05	[ANTXR1, ATM, BIRC5, BRCC3, BUB1, BUB1B, CCNA2, CCNB1, CCND1, CCNE2, CDC2, CDC45L, CDC6, CDKN2B, CDT1, CENPE, CENPF, CHEK1, DGKZ, DTL, FAM175A, FOXN3, HRAS, KNTC1, MAD2L1, MSH2, PLK1, RBM38, RFWD3, RINT1, RRAD, TP53, TP63, TP73, TTK, ZAK, ZWILCH, ZWINT]	[ANTXR1, APC, ARTN, ATM, ATRIP, BIRC5, BLM, BRCA1, BRCC3, BRE, BRIP1, BRSK1, BUB1, BUB1B, BUB3, CASC5, CCNA2, CCNB1, CCND1, CCNE2, CCNG1, CCNG2, CDC14B, CDC2, CDC45L, CDC6, CDKN2A, CDKN2B, CDT1, CENPE, CENPF, CEP63, CHEK1, CHEK2, CHFR, CLSPN, DCLRE1B, DDB1, DGKZ, DLGAP5, DTL, ERCC2, ERCC3, FAM175A, FANCG, FBXO31, FBXO6, FOXN3, FOXO4, FZR1, GML, GTSE1, H2AFX, HRAS, HUS1, INTS3, KNTC1, MAD1L1, MAD2…	[BIRC5, BRCC3, BUB1, BUB1B, CCNA2, CCNB1, CCND1, CCNE2, CDC2, CDC45L, CDC6, CDT1, CENPE, CENPF, CHEK1, DGKZ, DTL, HRAS, KNTC1, MAD2L1, MSH2, PLK1, RFWD3, TP53, TP63, TP73, TTK, ZWILCH, ZWINT]	[ANTXR1, ATM, CDKN2B, FAM175A, FOXN3, RBM38, RINT1, RRAD, ZAK]	76.3158	23.6842	Specific for Cluster 1
GO:0007507	GO_BiologicalProcess_16.11.2010_17h17	heart development	68	28.5714	1.29719e-06	5.11891e-05	[ACTC1, ACVR1, ADAMTS1, ALDH1A2, ATM, BBS4, BMP4, CASP3, CASQ2, CCNB1, CDC2, CHD7, COL3A1, CPE, ECE2, EDNRA, ERBB2, ERBB3, FBN1, FHL2, FOXJ1, FOXP1, GATA6, GLI2, GNAQ, HAND1, HAND2, HHEX, HOXA13, ID1, ID3, IRX4, JUP, KCNJ8, LY6E, MSX2, MYH11, NRP2, OBSL1, PDLIM3, PKD1, PKD2, PLN, POU5F1, PRKDC, PTCH1, RBP4, RBPJ, SFRP2, SMAD3, SMAD7, SMARCD3, SOX17, SOX18, SOX4, SRF, TBX1, TBX5, TEAD1, TGFBR1, TG…	[ACTC1, ACVR1, ACVR2B, ADAMTS1, ADAP2, ADIPOR2, ADM, ADRA1B, ADRBK1, ALDH1A2, ALPK3, ATG5, ATM, BAZ1B, BBS4, BBS5, BBS7, BCOR, BMP10, BMP2, BMP4, BMPR1A, C2CD3, CALCRL, CASP3, CASP7, CASP8, CASQ2, CBY1, CCNB1, CDC2, CHD7, CHRNA3, CITED2, COL2A1, COL3A1, COL4A3BP, COL5A1, CPE, CRELD1, CRKL, CSRP3, CTNNB1, CXADR, DICER1, DLEC1, DVL2, ECE1, ECE2, EDN1, EDNRA, EGLN1, ENG, EP300, EPOR, ERBB2, ERBB3, E…	[CASP3, CCNB1, CDC2, CHD7, ECE2, ERBB2, ERBB3, FOXJ1, ID1, IRX4, JUP, LY6E, POU5F1, PRKDC, SMAD3, SOX4, TBX1, TH, VANGL2, VEGFA]	[ACTC1, ACVR1, ADAMTS1, ALDH1A2, ATM, BBS4, BMP4, CASQ2, COL3A1, CPE, EDNRA, FBN1, FHL2, FOXP1, GATA6, GLI2, GNAQ, HAND1, HAND2, HHEX, HOXA13, ID3, KCNJ8, MSX2, MYH11, NRP2, OBSL1, PDLIM3, PKD1, PKD2, PLN, PTCH1, RBP4, RBPJ, SFRP2, SMAD7, SMARCD3, SOX17, SOX18, SRF, TBX5, TEAD1, TGFBR1, TGFBR3, TNNT2, TPM1, TSC2, VEGFB]	29.4118	70.5882	Specific for Cluster 2
GO:0000087	GO_BiologicalProcess_16.11.2010_17h17	M phase of mitotic cell cycle	64	28.8288	1.88791e-06	6.45665e-05	[ANAPC10, ANLN, ASPM, AURKA, AURKB, BIRC5, BUB1, BUB1B, CCNA2, CCNB1, CCNB2, CD2AP, CDC2, CDC20, CDC25C, CDC6, CDCA3, CDCA5, CDCA8, CENPE, CENPF, CEP55, ERCC6L, ESPL1, FAM83D, FBXO5, HELLS, HMGA2, KIF11, KIF15, KIF18A, KIF23, KIF2A, KIF2C, KIFC1, KLHL21, KNTC1, LATS2, LZTS2, MAD2L1, MAPRE2, MPHOSPH6, NCAPG, NCAPG2, NCAPH, NDC80, NEK2, NUF2, NUSAP1, OIP5, PBK, PKMYT1, PLK1, PTTG1, RCC2, SAC3D1, SG…	[AKAP8, ANAPC1, ANAPC10, ANAPC11, ANAPC13, ANAPC2, ANAPC4, ANAPC5, ANAPC7, ANLN, APC, ARHGEF2, ARL8A, ASPM, AURKA, AURKB, BIRC5, BUB1, BUB1B, BUB3, C12orf11, C7orf11, CASC5, CCDC99, CCNA1, CCNA2, CCNB1, CCNB2, CCNF, CCNG1, CCNG2, CCNK, CD2AP, CDC16, CDC2, CDC20, CDC23, CDC25A, CDC25B, CDC25C, CDC26, CDC27, CDC6, CDCA2, CDCA3, CDCA5, CDCA8, CDK2, CDK3, CENPE, CENPF, CENPH, CEP164, CEP55, CEP63, CE…	[ANAPC10, ANLN, ASPM, AURKA, AURKB, BIRC5, BUB1, BUB1B, CCNA2, CCNB1, CCNB2, CD2AP, CDC2, CDC20, CDC25C, CDC6, CDCA3, CDCA5, CDCA8, CENPE, CENPF, CEP55, ERCC6L, ESPL1, FBXO5, HELLS, HMGA2, KIF11, KIF15, KIF18A, KIF23, KIF2A, KIF2C, KIFC1, KNTC1, MAD2L1, MPHOSPH6, NCAPG, NCAPG2, NCAPH, NDC80, NEK2, NUF2, NUSAP1, OIP5, PBK, PKMYT1, PLK1, PTTG1, RCC2, SAC3D1, SGOL1, SMC4, SPAG5, SSSCA1, TIMELESS, TP…	[FAM83D, KLHL21, LATS2, LZTS2, MAPRE2]	92.1875	7.8125	Specific for Cluster 1
GO:0071156	GO_BiologicalProcess_16.11.2010_17h17	regulation of cell cycle arrest	39	34.5133	1.78421e-06	6.53787e-05	[ANTXR1, ATM, BIRC5, BRCC3, BUB1, BUB1B, CCNA2, CCNB1, CCND1, CCNE2, CDC2, CDC45L, CDC6, CDKN2B, CDT1, CENPE, CENPF, CHEK1, DGKZ, DTL, FAM175A, FOXN3, HRAS, KNTC1, MAD2L1, MSH2, PLK1, RBM38, RFWD3, RINT1, RRAD, S100A9, TP53, TP63, TP73, TTK, ZAK, ZWILCH, ZWINT]	[ANTXR1, APC, ARTN, ATM, ATRIP, BIRC5, BLM, BRCA1, BRCC3, BRE, BRIP1, BRSK1, BUB1, BUB1B, BUB3, CASC5, CCNA2, CCNB1, CCND1, CCNE2, CCNG1, CCNG2, CDC14B, CDC2, CDC45L, CDC6, CDKN2A, CDKN2B, CDT1, CENPE, CENPF, CEP63, CHEK1, CHEK2, CHFR, CLSPN, DCLRE1B, DDB1, DGKZ, DLGAP5, DTL, ERCC2, ERCC3, FAM175A, FANCG, FBXO31, FBXO6, FGF10, FOXM1, FOXN3, FOXO4, FZR1, GML, GTSE1, H2AFX, HRAS, HUS1, INTS3, KNTC1…	[BIRC5, BRCC3, BUB1, BUB1B, CCNA2, CCNB1, CCND1, CCNE2, CDC2, CDC45L, CDC6, CDT1, CENPE, CENPF, CHEK1, DGKZ, DTL, HRAS, KNTC1, MAD2L1, MSH2, PLK1, RFWD3, S100A9, TP53, TP63, TP73, TTK, ZWILCH, ZWINT]	[ANTXR1, ATM, CDKN2B, FAM175A, FOXN3, RBM38, RINT1, RRAD, ZAK]	76.9231	23.0769	Specific for Cluster 1
GO:0001568	GO_BiologicalProcess_16.11.2010_17h17	blood vessel development	71	27.6265	2.92373e-06	7.89406e-05	[ACVR1, ACVRL1, ALDH1A2, ANG, ANGPT1, ARHGAP24, BMP4, CEACAM1, CHD7, COL15A1, COL1A2, COL3A1, COL8A2, CTGF, CXCL17, CYR61, DHCR7, EDNRA, ENPEP, EREG, FGF13, FGF9, FGFR1, FIGF, FN1, FZD4, HAND1, HAND2, HHEX, HOXA13, HOXB3, HSPG2, ID1, IHH, ITGA5, ITGA7, JUN, KLF5, LAMA4, MEOX2, MMP14, MPZ, NOTCH4, NSDHL, PKD1, PLAU, PPAP2B, PRRX1, RBPJ, RECK, ROBO4, RTN4, S100A7, SFRP2, SGPL1, SLIT2, SMAD7, SOX17,…	[AAMP, ACVR1, ACVRL1, ADAM15, ADRA2B, AGGF1, AGXT, AKT1, ALDH1A2, AMOT, ANG, ANGPT1, ANGPTL3, ANGPTL6, ANPEP, ANXA2, ANXA2P2, APOB, APOE, APOLD1, ARHGAP22, ARHGAP24, ATP5B, ATP7A, ATPIF1, B4GALT1, BMP4, BMPER, C1GALT1, CASP8, CAV1, CCBE1, CCM2, CD44, CDH13, CDH2, CDH5, CDX2, CDX4, CEACAM1, CHD7, CITED1, COL15A1, COL18A1, COL1A1, COL1A2, COL3A1, COL4A1, COL5A1, COL8A1, COL8A2, CRKL, CSPG4, CTGF, C…	[CEACAM1, CHD7, CXCL17, DHCR7, EREG, HOXB3, ID1, IHH, KLF5, MMP14, NSDHL, PLAU, S100A7, SGPL1, SPINT1, SRPX2, TYMP, VAV2, VAV3, VEGFA]	[ACVR1, ACVRL1, ALDH1A2, ANG, ANGPT1, ARHGAP24, BMP4, COL15A1, COL1A2, COL3A1, COL8A2, CTGF, CYR61, EDNRA, ENPEP, FGF13, FGF9, FGFR1, FIGF, FN1, FZD4, HAND1, HAND2, HHEX, HOXA13, HSPG2, ITGA5, ITGA7, JUN, LAMA4, MEOX2, MPZ, NOTCH4, PKD1, PPAP2B, PRRX1, RBPJ, RECK, ROBO4, RTN4, SFRP2, SLIT2, SMAD7, SOX17, SOX18, SRF, TGFBR1, THBS1, TNFRSF12A, VEGFB, WASF2]	28.169	71.831	Specific for Cluster 2
GO:0043627	GO_BiologicalProcess_16.11.2010_17h17	response to estrogen stimulus	39	33.6207	3.71811e-06	7.94747e-05	[ALDH1A2, ANGPT1, ARNT2, AURKA, BCL2, BMP4, CA2, CCNA2, CCND1, CCND2, CCNE1, CD24, CRYAB, CTGF, DUSP1, ENO2, ESR1, FOXA1, GAL, GATA3, GATA6, GHR, GSTM3, IHH, IL1B, KRT19, LDLR, MAP1B, MMP14, MSX2, PTCH1, RGS9, SOCS2, STAT5B, TFF1, TGFB3, TGFBR1, TIMP3, WFDC1]	[ALDH1A2, ANGPT1, ARNT2, ARSA, ARSB, ASH2L, AURKA, BCL2, BGLAP, BMP4, BMP7, BRCA1, BRCA2, BTF3L1, CA2, CASP6, CASP8, CAV1, CCNA2, CCND1, CCND2, CCNE1, CD24, CD38, CFTR, CITED1, CRIPAK, CRYAB, CTGF, CTNNB1, CYP11A1, CYP27B1, DHH, DUSP1, ENO2, EP300, EPX, ESR1, F3, F7, FGF10, FOXA1, GAL, GATA3, GATA4, GATA6, GH1, GHR, GHRHR, GHRL, GPR81, GPX4, GSTM3, IGFBP2, IHH, IL1B, INSR, KRT19, LCT, LDLR, LEPRO…	[AURKA, CA2, CCNA2, CCND1, CCNE1, CD24, FOXA1, GAL, GATA3, GSTM3, IHH, KRT19, MMP14]	[ALDH1A2, ANGPT1, ARNT2, BCL2, BMP4, CCND2, CRYAB, CTGF, DUSP1, ENO2, ESR1, GATA6, GHR, IL1B, LDLR, MAP1B, MSX2, PTCH1, RGS9, SOCS2, STAT5B, TFF1, TGFB3, TGFBR1, TIMP3, WFDC1]	33.3333	66.6667	Specific for Cluster 2
GO:0048545	GO_BiologicalProcess_16.11.2010_17h17	response to steroid hormone stimulus	65	28.3843	2.82056e-06	8.0386e-05	[A2M, ADIPOQ, ALDH1A2, ALDH2, ANGPT1, AQP1, ARNT2, AURKA, BCHE, BCL2, BMP4, CA2, CA4, CA9, CCL2, CCNA2, CCND1, CCND2, CCNE1, CD24, CDO1, CRYAB, CTGF, DUSP1, ENO2, ERBB2, ESR1, FOXA1, GAL, GATA3, GATA6, GHR, GPX3, GSTM3, HSD11B2, IHH, IL1B, IL1RN, KRT19, LDLR, MAOB, MAP1B, MMP14, MSX2, PDE5A, PRSS8, PTCH1, PTGS1, PTPRU, RGS9, SDC1, SERPINF1, SLIT2, SLIT3, SOCS2, SPP1, STAT5B, TFF1, TGFB3, TGFBR1, …	[A2M, AANAT, ABCA2, ABCB4, ACADS, ACR, ACSBG1, ACSL6, ACTA1, ADAM9, ADIPOQ, ADM, AGXT, ALDH1A2, ALDH2, ALDOB, ALPL, ANGPT1, ANXA3, AQP1, ARNT2, ARSA, ARSB, ASH2L, ASS1, AURKA, AVPR1A, BCHE, BCKDHB, BCL2, BGLAP, BMP4, BMP7, BRCA1, BRCA2, BTF3L1, C1QB, CA2, CA4, CA9, CACNA1G, CALCR, CASP6, CASP8, CAV1, CCKAR, CCL2, CCL5, CCNA2, CCND1, CCND2, CCNE1, CD24, CD38, CDK4, CDO1, CEBPA, CFTR, CITED1, COL1A…	[AURKA, CA2, CA4, CA9, CCNA2, CCND1, CCNE1, CD24, ERBB2, FOXA1, GAL, GATA3, GSTM3, HSD11B2, IHH, IL1RN, KRT19, MMP14, PRSS8, PTPRU, SDC1, SPP1, TH, TLR2]	[A2M, ADIPOQ, ALDH1A2, ALDH2, ANGPT1, AQP1, ARNT2, BCHE, BCL2, BMP4, CCL2, CCND2, CDO1, CRYAB, CTGF, DUSP1, ENO2, ESR1, GATA6, GHR, GPX3, IL1B, LDLR, MAOB, MAP1B, MSX2, PDE5A, PTCH1, PTGS1, RGS9, SERPINF1, SLIT2, SLIT3, SOCS2, STAT5B, TFF1, TGFB3, TGFBR1, THBS1, TIMP3, WFDC1]	36.9231	63.0769	Common
GO:0000280	GO_BiologicalProcess_16.11.2010_17h17	nuclear division	62	28.8372	2.68998e-06	8.11742e-05	[ANAPC10, ANLN, ASPM, AURKA, AURKB, BIRC5, BUB1, BUB1B, CCNA2, CCNB1, CCNB2, CD2AP, CDC2, CDC20, CDC6, CDCA3, CDCA5, CDCA8, CENPE, CENPF, CEP55, ERCC6L, ESPL1, FAM83D, FBXO5, HELLS, HMGA2, KIF11, KIF15, KIF18A, KIF23, KIF2A, KIF2C, KIFC1, KLHL21, KNTC1, LATS2, LZTS2, MAD2L1, MAPRE2, NCAPG, NCAPG2, NCAPH, NDC80, NEK2, NUF2, NUSAP1, OIP5, PBK, PKMYT1, PLK1, PTTG1, RCC2, SAC3D1, SGOL1, SMC4, SPAG5, …	[AKAP8, ANAPC1, ANAPC10, ANAPC11, ANAPC13, ANAPC2, ANAPC4, ANAPC5, ANAPC7, ANLN, APC, ARHGEF2, ARL8A, ASPM, AURKA, AURKB, BIRC5, BUB1, BUB1B, BUB3, C12orf11, C7orf11, CASC5, CCDC99, CCNA1, CCNA2, CCNB1, CCNB2, CCNF, CCNG1, CCNG2, CCNK, CD2AP, CDC16, CDC2, CDC20, CDC23, CDC25A, CDC25B, CDC26, CDC27, CDC6, CDCA2, CDCA3, CDCA5, CDCA8, CDK2, CDK3, CENPE, CENPF, CENPH, CEP164, CEP55, CEP63, CETN1, CET…	[ANAPC10, ANLN, ASPM, AURKA, AURKB, BIRC5, BUB1, BUB1B, CCNA2, CCNB1, CCNB2, CD2AP, CDC2, CDC20, CDC6, CDCA3, CDCA5, CDCA8, CENPE, CENPF, CEP55, ERCC6L, ESPL1, FBXO5, HELLS, HMGA2, KIF11, KIF15, KIF18A, KIF23, KIF2A, KIF2C, KIFC1, KNTC1, MAD2L1, NCAPG, NCAPG2, NCAPH, NDC80, NEK2, NUF2, NUSAP1, OIP5, PBK, PKMYT1, PLK1, PTTG1, RCC2, SAC3D1, SGOL1, SMC4, SPAG5, SSSCA1, TIMELESS, TPX2, ZWILCH, ZWINT]	[FAM83D, KLHL21, LATS2, LZTS2, MAPRE2]	91.9355	8.06452	Specific for Cluster 1
GO:0007067	GO_BiologicalProcess_16.11.2010_17h17	mitosis	62	28.8372	2.68998e-06	8.11742e-05	[ANAPC10, ANLN, ASPM, AURKA, AURKB, BIRC5, BUB1, BUB1B, CCNA2, CCNB1, CCNB2, CD2AP, CDC2, CDC20, CDC6, CDCA3, CDCA5, CDCA8, CENPE, CENPF, CEP55, ERCC6L, ESPL1, FAM83D, FBXO5, HELLS, HMGA2, KIF11, KIF15, KIF18A, KIF23, KIF2A, KIF2C, KIFC1, KLHL21, KNTC1, LATS2, LZTS2, MAD2L1, MAPRE2, NCAPG, NCAPG2, NCAPH, NDC80, NEK2, NUF2, NUSAP1, OIP5, PBK, PKMYT1, PLK1, PTTG1, RCC2, SAC3D1, SGOL1, SMC4, SPAG5, …	[AKAP8, ANAPC1, ANAPC10, ANAPC11, ANAPC13, ANAPC2, ANAPC4, ANAPC5, ANAPC7, ANLN, APC, ARHGEF2, ARL8A, ASPM, AURKA, AURKB, BIRC5, BUB1, BUB1B, BUB3, C12orf11, C7orf11, CASC5, CCDC99, CCNA1, CCNA2, CCNB1, CCNB2, CCNF, CCNG1, CCNG2, CCNK, CD2AP, CDC16, CDC2, CDC20, CDC23, CDC25A, CDC25B, CDC26, CDC27, CDC6, CDCA2, CDCA3, CDCA5, CDCA8, CDK2, CDK3, CENPE, CENPF, CENPH, CEP164, CEP55, CEP63, CETN1, CET…	[ANAPC10, ANLN, ASPM, AURKA, AURKB, BIRC5, BUB1, BUB1B, CCNA2, CCNB1, CCNB2, CD2AP, CDC2, CDC20, CDC6, CDCA3, CDCA5, CDCA8, CENPE, CENPF, CEP55, ERCC6L, ESPL1, FBXO5, HELLS, HMGA2, KIF11, KIF15, KIF18A, KIF23, KIF2A, KIF2C, KIFC1, KNTC1, MAD2L1, NCAPG, NCAPG2, NCAPH, NDC80, NEK2, NUF2, NUSAP1, OIP5, PBK, PKMYT1, PLK1, PTTG1, RCC2, SAC3D1, SGOL1, SMC4, SPAG5, SSSCA1, TIMELESS, TPX2, ZWILCH, ZWINT]	[FAM83D, KLHL21, LATS2, LZTS2, MAPRE2]	91.9355	8.06452	Specific for Cluster 1
GO:0007346	GO_BiologicalProcess_16.11.2010_17h17	regulation of mitotic cell cycle	53	30.1136	3.48455e-06	8.12533e-05	[ANAPC10, ANLN, APBB1, ATM, BCL2, BIRC5, BMP4, BUB1, BUB1B, C13orf34, CCNA2, CCNB1, CCND1, CDC2, CDC25C, CDC6, CDKN2B, CDT1, CENPE, CENPF, DCUN1D3, DGKZ, DUSP3, EREG, ESPL1, FBXO5, FOXA1, GAS1, HOXA13, HRAS, IGF1, IL1B, KNTC1, MAD2L1, NEK2, NUSAP1, PKIA, PKMYT1, PLK1, PRMT5, RBM38, RFWD3, SMAD3, STAT5B, TGFA, TP53, TP63, TP73, TPX2, TTK, UBD, ZWILCH, ZWINT]	[AATF, AFAP1L2, ANAPC10, ANLN, APBB1, APBB2, APC, APP, ARTN, ASNS, ATM, AURKAIP1, BCL2, BCL6, BIRC5, BMP4, BMP7, BRCA2, BTC, BTG3, BTG4, BUB1, BUB1B, C12orf11, C13orf34, CAV2, CCNA2, CCNB1, CCND1, CCNG1, CD28, CDC123, CDC16, CDC2, CDC23, CDC25C, CDC6, CDK10, CDK2, CDKN2A, CDKN2B, CDT1, CENPE, CENPF, CHFR, CHMP1A, CLSPN, CUL7, CYLD, CYP1A1, DCUN1D3, DGKZ, DLGAP5, DRD3, DUSP3, DYNC1LI1, DYNLT3, E4F…	[ANAPC10, ANLN, BIRC5, BUB1, BUB1B, C13orf34, CCNA2, CCNB1, CCND1, CDC2, CDC25C, CDC6, CDT1, CENPE, CENPF, DGKZ, EREG, ESPL1, FBXO5, FOXA1, HRAS, KNTC1, MAD2L1, NEK2, NUSAP1, PKIA, PKMYT1, PLK1, PRMT5, RFWD3, SMAD3, TGFA, TP53, TP63, TP73, TPX2, TTK, UBD, ZWILCH, ZWINT]	[APBB1, ATM, BCL2, BMP4, CDKN2B, DCUN1D3, DUSP3, GAS1, HOXA13, IGF1, IL1B, RBM38, STAT5B]	75.4717	24.5283	Specific for Cluster 1
GO:0045785	GO_BiologicalProcess_16.11.2010_17h17	positive regulation of cell adhesion	28	38.8889	3.67288e-06	8.19212e-05	[ALOX12, ANGPT1, C4orf31, CCDC80, CD36, CHRD, CYR61, CYTH3, ECM2, EMILIN1, EPB41L5, ERBB2, FSTL3, IL1B, ILK, ITGA2, ITGA6, NCKAP1L, PPAP2B, PRKCZ, SAA1, SFRP2, SMAD3, SMAD7, TGM2, THBS1, TPM1, VAV3]	[ADAM9, ALOX12, ANGPT1, APC, AZU1, C4orf31, CCDC80, CD36, CD47, CD63, CDH13, CDK6, CHRD, CITED2, CSF1, CX3CL1, CYR61, CYTH3, DMTF1, ECM2, EDIL3, EGFLAM, EMID2, EMILIN1, EPB41L5, ERBB2, FGF1, FSTL3, GSK3B, HSD17B12, IFNG, IL12A, IL12B, IL1B, ILK, ITGA2, ITGA6, KDR, KIFAP3, L1CAM, LEF1, LGALS1, NCKAP1L, NRG1, PLD2, PLEKHA2, PODXL, PPAP2B, PRKCZ, PRSS2, RELL2, RHOA, SAA1, SDC4, SEPP1, SFRP1, SFRP2, …	[ALOX12, ERBB2, ITGA2, ITGA6, PRKCZ, SAA1, SMAD3, VAV3]	[ANGPT1, C4orf31, CCDC80, CD36, CHRD, CYR61, CYTH3, ECM2, EMILIN1, EPB41L5, FSTL3, IL1B, ILK, NCKAP1L, PPAP2B, SFRP2, SMAD7, TGM2, THBS1, TPM1]	28.5714	71.4286	Specific for Cluster 2
GO:0001944	GO_BiologicalProcess_16.11.2010_17h17	vasculature development	73	27.3408	3.22001e-06	8.25932e-05	[ACVR1, ACVRL1, ALDH1A2, ANG, ANGPT1, ARHGAP24, BMP4, CEACAM1, CHD7, COL15A1, COL1A2, COL3A1, COL8A2, CTGF, CXCL17, CYR61, DHCR7, EDNRA, ENPEP, EREG, FGF13, FGF9, FGFR1, FIGF, FN1, FZD4, HAND1, HAND2, HHEX, HOXA13, HOXB3, HSPG2, ID1, IGF1, IHH, ITGA5, ITGA7, JUN, KLF5, LAMA4, MEOX2, MMP14, MPZ, NOTCH4, NSDHL, PKD1, PLAU, PPAP2B, PRRX1, RBPJ, RECK, ROBO4, RTN4, S100A7, SFRP2, SGPL1, SLIT2, SMAD7, …	[AAMP, ACVR1, ACVRL1, ADAM15, ADRA2B, AGGF1, AGXT, AKT1, ALDH1A2, AMOT, ANG, ANGPT1, ANGPTL3, ANGPTL6, ANPEP, ANXA2, ANXA2P2, APOB, APOE, APOLD1, ARHGAP22, ARHGAP24, ATP5B, ATP7A, ATPIF1, B4GALT1, BMP4, BMPER, C1GALT1, CALCA, CASP8, CAV1, CCBE1, CCM2, CD44, CDH13, CDH2, CDH5, CDX2, CDX4, CEACAM1, CHD7, CITED1, COL15A1, COL18A1, COL1A1, COL1A2, COL3A1, COL4A1, COL5A1, COL8A1, COL8A2, CRKL, CSPG4, …	[CEACAM1, CHD7, CXCL17, DHCR7, EREG, HOXB3, ID1, IHH, KLF5, MMP14, NSDHL, PLAU, S100A7, SGPL1, SPINT1, SRPX2, TYMP, VAV2, VAV3, VEGFA]	[ACVR1, ACVRL1, ALDH1A2, ANG, ANGPT1, ARHGAP24, BMP4, COL15A1, COL1A2, COL3A1, COL8A2, CTGF, CYR61, EDNRA, ENPEP, FGF13, FGF9, FGFR1, FIGF, FN1, FZD4, HAND1, HAND2, HHEX, HOXA13, HSPG2, IGF1, ITGA5, ITGA7, JUN, LAMA4, MEOX2, MPZ, NOTCH4, PKD1, PPAP2B, PRRX1, RBPJ, RECK, ROBO4, RTN4, SFRP2, SLIT2, SMAD7, SOX17, SOX18, SRF, TCF21, TGFBR1, THBS1, TNFRSF12A, VEGFB, WASF2]	27.3973	72.6027	Specific for Cluster 2
GO:0048705	GO_BiologicalProcess_16.11.2010_17h17	skeletal system morphogenesis	42	33.0709	2.59514e-06	8.32065e-05	[ARID5B, BARX2, BMP4, BMP6, CTGF, DSCAML1, EYA1, GAS1, GHR, HOXA11, HOXB3, HOXB4, HOXB5, HOXB6, HOXB7, HOXB8, MDFI, MEF2D, MGP, NAB1, NAB2, OSR2, PDGFRB, PKD1, PRRX1, RECQL4, RORA, SFRP2, SGPL1, SIX1, SIX2, SIX4, SMAD3, TBX1, TFAP2A, TGFB3, TGFBR1, THBS1, THBS3, THRA, TWIST1, ZEB1]	[ACP5, ACVR2B, ALX1, ALX3, ALX4, ANKRD11, ARID5B, AXIN1, BARX2, BMP1, BMP4, BMP6, BMP7, BMPR1B, CDX1, CHST11, COL11A2, COL13A1, COL1A1, COL2A1, COL9A1, COMP, CTGF, DLX5, DSCAML1, EYA1, FBN2, FGF18, FGF4, FGF6, FOXC2, GAS1, GFPT1, GHR, GLI3, GNAS, GSC, HOXA11, HOXA2, HOXA3, HOXA4, HOXA5, HOXA6, HOXA7, HOXB1, HOXB2, HOXB3, HOXB4, HOXB5, HOXB6, HOXB7, HOXB8, HOXC8, HOXD10, HOXD11, HOXD3, HOXD4, HOXD…	[BARX2, HOXB3, HOXB4, HOXB5, HOXB6, HOXB7, HOXB8, MDFI, RECQL4, SGPL1, SIX1, SIX2, SIX4, SMAD3, TBX1, TFAP2A]	[ARID5B, BMP4, BMP6, CTGF, DSCAML1, EYA1, GAS1, GHR, HOXA11, MEF2D, MGP, NAB1, NAB2, OSR2, PDGFRB, PKD1, PRRX1, RORA, SFRP2, TGFB3, TGFBR1, THBS1, THBS3, THRA, TWIST1, ZEB1]	38.0952	61.9048	Common
GO:0043067	GO_BiologicalProcess_16.11.2010_17h17	regulation of programmed cell death	191	22.0809	3.47346e-06	8.48518e-05	[ABL1, ACVR1, ADAMTSL4, ADIPOQ, AEN, ALDH1A2, ALOX12, AMIGO2, ANGPT1, APBB1, AQP1, ARHGEF16, ARHGEF9, ARNT2, ATM, BAG3, BAK1, BCL11B, BCL2, BCL2A1, BCL2L11, BCL2L2, BDKRB2, BDNF, BID, BIK, BIRC3, BIRC5, BMP4, BNIP3, BTG2, CARD11, CASP2, CASP3, CCL2, CD24, CD70, CDC2, CDH1, CDK5R1, CFDP1, CIDEA, COL4A3, CRH, CRYAB, CTGF, DAPK3, DCUN1D3, DDAH2, DDIT3, DEDD2, DHCR24, DHODH, DNM2, DUSP1, ECT2, EI24, …	[AATF, ABL1, ABR, ACTN1, ACTN2, ACTN3, ACTN4, ACVR1, ACVR1B, ACVR1C, ADA, ADAM17, ADAMTS20, ADAMTSL4, ADCY10, ADIPOQ, ADNP, ADORA1, ADORA2A, ADRB2, AEN, AGTR2, AGXT, AIFM1, AIFM2, AIFM3, AIPL1, AKAP13, AKT1, AKT1S1, AKT2, ALB, ALDH1A2, ALDH1A3, ALKBH1, ALOX12, ALOX15B, ALX3, ALX4, AMIGO2, ANGPT1, ANGPT4, ANGPTL4, ANXA1, ANXA4, ANXA5, APAF1, APBB1, APC, APH1A, APH1B, API5, APOE, APOH, APP, AQP1, A…	[ALOX12, AMIGO2, ARHGEF16, BAK1, BCL11B, BCL2A1, BCL2L11, BID, BIK, BIRC3, BIRC5, CARD11, CASP2, CASP3, CD24, CD70, CDC2, CDH1, CDK5R1, CRH, DEDD2, DHCR24, DHODH, DNM2, ECT2, EI24, ERBB2, ERBB3, FADD, FAIM3, FOXA1, FURIN, GAL, GSTP1, HELLS, HSPA5, HSPE1, HTATIP2, IFI27, IGFBP3, IHH, IKBKE, INDO, INHBA, IRAK1, JAG2, LCN2, MAD2L1, MAP3K5, MMP9, MSH2, NACC1, NGEF, NGFRAP1, NLRP2, NME1, NPM1, OBSCN, …	[ABL1, ACVR1, ADAMTSL4, ADIPOQ, AEN, ALDH1A2, ANGPT1, APBB1, AQP1, ARHGEF9, ARNT2, ATM, BAG3, BCL2, BCL2L2, BDKRB2, BDNF, BMP4, BNIP3, BTG2, CCL2, CFDP1, CIDEA, COL4A3, CRYAB, CTGF, DAPK3, DCUN1D3, DDAH2, DDIT3, DUSP1, EPHA7, ESR1, EYA1, FAIM2, FGF13, FGFR1, GAS1, GATA6, GHR, GRIK5, HOXA13, ID3, IER3, IGF1, IL1B, ILK, ITGA1, JUN, KITLG, LRRK2, MEF2C, MITF, MLH1, MOAP1, MSX2, NCKAP1L, NOTCH2, NR4A…	52.8796	47.1204	Common
GO:0048732	GO_BiologicalProcess_16.11.2010_17h17	gland development	57	29.2308	4.24492e-06	8.71057e-05	[ALDH1A2, APLN, ATP7B, BCAT2, BCL2, BCL2L11, BMP4, CCL11, CCND1, CDH1, CDO1, COASY, CRH, CTNND1, DKK3, ERBB2, ERBB3, ESR1, EYA1, FGF13, FGF7, FGFR1, FOXA1, GLI2, HHEX, HOXA13, HOXB3, IGF1, IRF6, ITGA2, KIF2A, LY6E, MDK, NOTCH4, NTN1, PAX8, PBX1, PDGFRB, PGR, PTCH1, SIX1, SLIT2, SMAD3, SOX2, STAT5B, TBX1, TCF21, TGFB3, TGFBR1, TGM2, THRA, TNNC1, TP63, VEGFA, WDR77, WNT10A, XDH]	[AGPAT6, AHR, ALDH1A2, ALDH1A3, ALOX15B, APLN, APOA1, AREG, ASCL1, ATP7B, B4GALT1, BCAT2, BCL2, BCL2L11, BMP2, BMP4, BMP7, BMPR1A, BRCA2, BSX, BTRC, C21orf33, CAV1, CCL11, CCND1, CD44, CDH1, CDO1, CEBPB, CHGA, CHUK, CLCN2, COASY, CREB1, CRH, CRKL, CSF1, CTNNB1, CTNND1, CYP19A1, CYP7B1, DAG1, DKK3, DRD2, EDA, EGF, EGFR, EIF2AK3, ELF3, ELF5, ERBB2, ERBB3, ERBB4, ESR1, ESR2, EYA1, FEM1B, FGF10, FGF1…	[APLN, ATP7B, BCAT2, BCL2L11, CCND1, CDH1, COASY, CRH, CTNND1, ERBB2, ERBB3, FOXA1, HOXB3, IRF6, ITGA2, KIF2A, LY6E, MDK, PAX8, SIX1, SMAD3, SOX2, TBX1, TNNC1, TP63, VEGFA, WDR77, WNT10A, XDH]	[ALDH1A2, BCL2, BMP4, CCL11, CDO1, DKK3, ESR1, EYA1, FGF13, FGF7, FGFR1, GLI2, HHEX, HOXA13, IGF1, NOTCH4, NTN1, PBX1, PDGFRB, PGR, PTCH1, SLIT2, STAT5B, TCF21, TGFB3, TGFBR1, TGM2, THRA]	50.8772	49.1228	Common
GO:0008544	GO_BiologicalProcess_16.11.2010_17h17	epidermis development	56	29.3194	4.64113e-06	9.15731e-05	[ADAMTS2, BARX2, BCL2, BNC1, CASP3, CLIC4, CNFN, COL17A1, COL1A2, COL3A1, COL7A1, CRABP2, CSTA, CTGF, DHCR24, EDA2R, EREG, EVPL, FGF7, GJB3, GJB5, GLI2, GRHL3, HOXC13, INHBA, IRF6, ITGA2, IVL, JUP, KRT13, KRT14, KRT15, KRT17, KRT5, LAMA4, LAMB3, LAMC2, NSDHL, NTF3, NTF4, POU3F1, PTCH1, PTHLH, S100A7, SFN, SNAI1, SOX18, SPRR1A, SPRR1B, SPRR2D, SPRR2E, SPRR2F, SPRR3, TGM1, TP63, WNT10A]	[ACVR1B, ADAM9, ADAMTS2, AKT1, ALDH3A2, ALOX12B, ALX4, ANXA1, APC, APCDD1, ASPRV1, ATP2A2, ATP2C1, ATP7A, BARX2, BCL2, BNC1, BTD, CALML5, CASP14, CASP3, CDSN, CLIC4, CNFN, COL17A1, COL1A1, COL1A2, COL3A1, COL5A1, COL5A2, COL5A3, COL7A1, CRABP2, CSTA, CSTB, CTGF, CTNNB1, DCT, DHCR24, DSPP, EDA, EDA2R, EDAR, EDARADD, EGFR, ELF3, EMP1, ERCC2, ERCC3, EREG, ERRFI1, EVPL, FABP5, FGF10, FGF7, FLG, FLOT2…	[BARX2, BNC1, CASP3, CNFN, COL17A1, COL7A1, CRABP2, CSTA, DHCR24, EREG, EVPL, GJB3, GJB5, GRHL3, HOXC13, INHBA, IRF6, ITGA2, IVL, JUP, KRT13, KRT14, KRT15, KRT17, KRT5, LAMB3, LAMC2, NSDHL, NTF4, POU3F1, PTHLH, S100A7, SFN, SPRR1A, SPRR1B, SPRR2D, SPRR2E, SPRR2F, SPRR3, TGM1, TP63, WNT10A]	[ADAMTS2, BCL2, CLIC4, COL1A2, COL3A1, CTGF, EDA2R, FGF7, GLI2, LAMA4, NTF3, PTCH1, SNAI1, SOX18]	75	25	Specific for Cluster 1
GO:0042981	GO_BiologicalProcess_16.11.2010_17h17	regulation of apoptosis	189	22.0023	4.97143e-06	9.44573e-05	[ABL1, ACVR1, ADAMTSL4, ADIPOQ, AEN, ALDH1A2, ALOX12, AMIGO2, ANGPT1, APBB1, AQP1, ARHGEF16, ARHGEF9, ARNT2, ATM, BAG3, BAK1, BCL11B, BCL2, BCL2A1, BCL2L11, BCL2L2, BDKRB2, BDNF, BID, BIK, BIRC3, BIRC5, BMP4, BNIP3, BTG2, CARD11, CASP2, CASP3, CCL2, CD24, CD70, CDC2, CDH1, CDK5R1, CFDP1, CIDEA, COL4A3, CRH, CRYAB, CTGF, DAPK3, DCUN1D3, DDAH2, DDIT3, DEDD2, DHCR24, DHODH, DNM2, DUSP1, ECT2, EI24, …	[AATF, ABL1, ABR, ACTN1, ACTN2, ACTN3, ACTN4, ACVR1, ACVR1B, ACVR1C, ADA, ADAM17, ADAMTS20, ADAMTSL4, ADCY10, ADIPOQ, ADNP, ADORA1, ADORA2A, ADRB2, AEN, AGTR2, AGXT, AIFM1, AIFM2, AIFM3, AIPL1, AKAP13, AKT1, AKT1S1, AKT2, ALB, ALDH1A2, ALDH1A3, ALKBH1, ALOX12, ALOX15B, ALX3, ALX4, AMIGO2, ANGPT1, ANGPT4, ANGPTL4, ANXA1, ANXA4, ANXA5, APAF1, APBB1, APC, APH1A, APH1B, API5, APOE, APOH, APP, AQP1, A…	[ALOX12, AMIGO2, ARHGEF16, BAK1, BCL11B, BCL2A1, BCL2L11, BID, BIK, BIRC3, BIRC5, CARD11, CASP2, CASP3, CD24, CD70, CDC2, CDH1, CDK5R1, CRH, DEDD2, DHCR24, DHODH, DNM2, ECT2, EI24, ERBB2, ERBB3, FADD, FAIM3, FOXA1, FURIN, GAL, GSTP1, HELLS, HSPA5, HSPE1, HTATIP2, IFI27, IGFBP3, IHH, IKBKE, INDO, INHBA, IRAK1, JAG2, LCN2, MAD2L1, MAP3K5, MMP9, MSH2, NACC1, NGEF, NGFRAP1, NLRP2, NME1, NPM1, OBSCN, …	[ABL1, ACVR1, ADAMTSL4, ADIPOQ, AEN, ALDH1A2, ANGPT1, APBB1, AQP1, ARHGEF9, ARNT2, ATM, BAG3, BCL2, BCL2L2, BDKRB2, BDNF, BMP4, BNIP3, BTG2, CCL2, CFDP1, CIDEA, COL4A3, CRYAB, CTGF, DAPK3, DCUN1D3, DDAH2, DDIT3, DUSP1, EPHA7, ESR1, EYA1, FAIM2, FGFR1, GAS1, GATA6, GHR, GRIK5, HOXA13, ID3, IER3, IGF1, IL1B, ILK, ITGA1, JUN, KITLG, MEF2C, MITF, MLH1, MOAP1, MSX2, NCKAP1L, NOTCH2, NR4A1, NTF3, NUPR1…	53.4392	46.5608	Common
GO:0042325	GO_BiologicalProcess_16.11.2010_17h17	regulation of phosphorylation	127	23.6499	5.41942e-06	9.92915e-05	[ADCY5, ADIPOQ, ADORA2B, ADRA2A, ANG, ANGPT1, ATXN1, AXIN2, BCL2, BDKRB1, BDKRB2, BMP4, BMP6, C5, CAMKK2, CASP3, CBLC, CCNB1, CCND1, CCND2, CCNE2, CD24, CDC25C, CDC6, CDK5R1, CDK7, CDKN2B, CDKN3, CENPE, CERK, CHEK1, CKS1B, CKS2, CNKSR3, CTGF, DAB2, DGKA, DGKB, DGKZ, DUSP16, DUSP3, DUSP8, DUSP9, EDN2, EDNRA, ENPP1, ERBB2, EREG, FAM129A, FGF13, FGF7, FZD1, FZD7, GADD45B, GADD45G, GHR, GNAQ, HSPA5, …	[ACVR1B, ACVR2B, ADAM17, ADAM9, ADCY1, ADCY2, ADCY4, ADCY5, ADCY6, ADCY7, ADCY8, ADIPOQ, ADNP, ADORA1, ADORA2A, ADORA2B, ADRA2A, ADRA2B, ADRA2C, ADRB2, AGK, AGXT, AIDA, AKAP5, AKT1, AKT1S1, AKT2, AKTIP, ALS2, ANAPC2, ANG, ANGPT1, ANGPT4, ANKRD54, APC, APOA1, APOE, APP, ARR3, ARTN, ATP7A, ATXN1, AXIN1, AXIN2, AZU1, BARD1, BCCIP, BCL10, BCL2, BDKRB1, BDKRB2, BIRC7, BLM, BMP10, BMP2, BMP4, BMP6, BMP…	[ADORA2B, CASP3, CBLC, CCNB1, CCND1, CCNE2, CD24, CDC25C, CDC6, CDK5R1, CDK7, CDKN3, CENPE, CHEK1, CKS1B, CKS2, DGKA, DGKZ, DUSP9, EDN2, ERBB2, EREG, HSPA5, IGFBP3, INHBA, IRAK1, LPAR2, LPAR3, MAP3K5, MCM7, MDFI, NPM1, PKIA, PKIB, PKMYT1, PPP1R14C, PRKCZ, S100A9, SFN, SMAD3, SPHK2, SPRY4, SRPX2, TARBP2, TGFA, TP53, TP73, TPX2, TRAF4, TRIB3, TTK, VAV2, VAV3, VEGFA]	[ADCY5, ADIPOQ, ADRA2A, ANG, ANGPT1, ATXN1, AXIN2, BCL2, BDKRB1, BDKRB2, BMP4, BMP6, C5, CAMKK2, CCND2, CDKN2B, CERK, CNKSR3, CTGF, DAB2, DGKB, DUSP16, DUSP3, DUSP8, EDNRA, ENPP1, FAM129A, FGF13, FGF7, FZD1, FZD7, GADD45B, GADD45G, GHR, GNAQ, IGF1, IL1B, ILK, ITGA1, ITGA5, JUN, KAT2B, KITLG, LATS2, LRRK2, MAP3K6, MS4A1, NCKAP1L, PDGFRB, PKIG, PKN1, PPAP2B, PPP1R14A, PRKACB, PRKAG2, PRKAR2B, RBPMS…	42.5197	57.4803	Common
GO:0010942	GO_BiologicalProcess_16.11.2010_17h17	positive regulation of cell death	112	24.2424	5.92778e-06	0.00010486	[ABL1, ADAMTSL4, ADIPOQ, AEN, ALDH1A2, ALOX12, APBB1, ARHGEF16, ARHGEF9, ATM, AXIN2, BAK1, BCL2, BCL2L11, BID, BIK, BMP4, BNIP3, CASP2, CASP3, CD24, CD70, CDK5R1, CIDEA, COL4A3, CRH, CTGF, DAPK3, DCUN1D3, DDIT3, DEDD2, DHODH, DNM2, DUSP1, ECT2, EI24, EPHA7, FADD, FOXA1, GAL, GATA6, GRIK5, HOXA13, HTATIP2, ID3, IFI27, IGFBP3, IKBKE, IL1B, INDO, INHBA, ITGA1, JUN, LRRK2, LZTS2, MAP3K5, MLH1, MMP9, …	[AATF, ABL1, ABR, ACVR1B, ADAMTSL4, ADCY10, ADIPOQ, ADORA1, ADORA2A, ADRB2, AEN, AGTR2, AGXT, AIFM1, AIFM2, AIFM3, AKAP13, AKT1, ALDH1A2, ALDH1A3, ALOX12, ALOX15B, APBB1, APC, APH1A, APH1B, APOE, APP, ARHGAP4, ARHGEF11, ARHGEF12, ARHGEF16, ARHGEF17, ARHGEF18, ARHGEF2, ARHGEF3, ARHGEF4, ARHGEF6, ARHGEF7, ARHGEF9, ASCL1, ATM, AXIN2, B4GALT1, BAD, BAK1, BARD1, BAX, BBC3, BCL10, BCL2, BCL2L1, BCL2L11…	[ALOX12, ARHGEF16, BAK1, BCL2L11, BID, BIK, CASP2, CASP3, CD24, CD70, CDK5R1, CRH, DEDD2, DHODH, DNM2, ECT2, EI24, FADD, FOXA1, GAL, HTATIP2, IFI27, IGFBP3, IKBKE, INDO, INHBA, MAP3K5, MMP9, MSH2, NACC1, NGEF, NGFRAP1, OBSCN, PDCD6, PERP, PMAIP1, PRKDC, PRODH, PYCARD, SFN, SH3RF1, SMAD3, SMPD2, SOX4, STAT1, TFPT, TLR2, TNFRSF25, TNFSF10, TOP2A, TP53, TP53I3, TP63, TP73, TRAF3, TUBB2C, UBD, UNC13D…	[ABL1, ADAMTSL4, ADIPOQ, AEN, ALDH1A2, APBB1, ARHGEF9, ATM, AXIN2, BCL2, BMP4, BNIP3, CIDEA, COL4A3, CTGF, DAPK3, DCUN1D3, DDIT3, DUSP1, EPHA7, GATA6, GRIK5, HOXA13, ID3, IL1B, ITGA1, JUN, LRRK2, LZTS2, MLH1, MSX2, NOTCH2, NR4A1, NUPR1, PDE5A, PLAGL1, PPP3CC, PRUNE2, RYR2, SFRP2, SFRP4, SLIT2, SQSTM1, TBX5, TGFB3, TGFBR1, TGM2, THBS1, TIAM2, TPD52L1, ZAK, ZBTB16]	53.5714	46.4286	Common
GO:0007093	GO_BiologicalProcess_16.11.2010_17h17	mitotic cell cycle checkpoint	22	42.3077	8.09612e-06	0.000138444	[ATM, BUB1, BUB1B, CCNA2, CCNB1, CCND1, CDC2, CDKN2B, CENPE, CENPF, DGKZ, HRAS, KNTC1, MAD2L1, RBM38, RFWD3, TP53, TP63, TP73, TTK, ZWILCH, ZWINT]	[APC, ARTN, ATM, BUB1, BUB1B, CCNA2, CCNB1, CCND1, CCNG1, CDC2, CDKN2B, CENPE, CENPF, CHFR, CLSPN, DGKZ, DLGAP5, FBXO31, FOXO4, GML, GTSE1, HRAS, HUS1, KNTC1, MAD1L1, MAD2L1, MAD2L1BP, MAD2L2, NAE1, PAK3, PML, PPP2R5C, PSMG2, RAD17, RB1, RBM38, RFWD3, RPL24, RPS27L, TERF1, TGFB1, TP53, TP63, TP73, TPR, TRIAP1, TRRAP, TTK, WNT9A, ZW10, ZWILCH, ZWINT]	[BUB1, BUB1B, CCNA2, CCNB1, CCND1, CDC2, CENPE, CENPF, DGKZ, HRAS, KNTC1, MAD2L1, RFWD3, TP53, TP63, TP73, TTK, ZWILCH, ZWINT]	[ATM, CDKN2B, RBM38]	86.3636	13.6364	Specific for Cluster 1
GO:0043009	GO_BiologicalProcess_16.11.2010_17h17	chordate embryonic development	94	24.9337	9.96109e-06	0.00016484	[ACVR1, ACVRL1, ALDH1A2, ANGPT1, ARNT2, ASCL2, ATM, AXIN2, BBS4, BCL2L11, BMP4, C5, CCNB1, CCNB2, CDH1, CELSR1, CHD7, CHRD, CYR61, DAB2, DSCAML1, EDNRA, EPB41L5, EYA1, FGF9, FGFR1, FOXA2, GAS1, GATA6, GINS1, GJB3, GJB5, GLI2, GNA12, HAND1, HAND2, HOXB3, HOXB4, HOXB5, HOXB6, HOXB7, HOXB8, JAG2, KIAA1217, KRT19, LY6E, MBNL1, MDFI, MEOX1, MEOX2, MNX1, MSH2, NSDHL, OSR2, PAX7, PBX1, PDGFRB, PKD1, PKD…	[ACVR1, ACVR1B, ACVR2A, ACVRL1, ADA, ADAM10, ADM, AKT1, ALDH1A2, ALKBH1, ALS2, ALX1, ALX3, ALX4, AMOT, ANGPT1, ANKRD11, APAF1, APBA1, APBA2, APBA3, APOB, AREG, ARNT, ARNT2, ARTN, ASCL2, ATM, AXIN1, AXIN2, BBS4, BCL10, BCL2L1, BCL2L11, BIRC6, BMP2, BMP4, BMP7, BMPR1A, BPTF, BRCA2, C21orf33, C2CD3, C5, C6, CAPN2, CASP8, CCNB1, CCNB1IP1, CCNB2, CDH1, CDX2, CDX4, CEBPA, CEBPB, CELSR1, CHD7, CHD8, CHR…	[ASCL2, BCL2L11, CCNB1, CCNB2, CDH1, CELSR1, CHD7, FOXA2, GINS1, GJB3, GJB5, HOXB3, HOXB4, HOXB5, HOXB6, HOXB7, HOXB8, JAG2, KIAA1217, KRT19, LY6E, MDFI, MNX1, MSH2, NSDHL, PAX7, PLK4, PRKDC, PTPRR, SIX1, SIX2, SIX4, SMAD3, SPINT1, TBX1, TFAP2A, TP53, VANGL2, VEGFA, ZIC2]	[ACVR1, ACVRL1, ALDH1A2, ANGPT1, ARNT2, ATM, AXIN2, BBS4, BMP4, C5, CHRD, CYR61, DAB2, DSCAML1, EDNRA, EPB41L5, EYA1, FGF9, FGFR1, GAS1, GATA6, GLI2, GNA12, HAND1, HAND2, MBNL1, MEOX1, MEOX2, OSR2, PBX1, PDGFRB, PKD1, PKD2, PRRX1, PTCH1, RBP4, RBPJ, RORA, SFRP2, SLIT2, SNAI1, SOX10, SOX18, SRF, TFEB, TGFB3, TGFBR1, TSC2, TSHZ3, TWIST1, VASP, ZEB1, ZEB2, ZNF358]	42.5532	57.4468	Common
GO:0048285	GO_BiologicalProcess_16.11.2010_17h17	organelle fission	62	27.5556	1.3275e-05	0.000212814	[ANAPC10, ANLN, ASPM, AURKA, AURKB, BIRC5, BUB1, BUB1B, CCNA2, CCNB1, CCNB2, CD2AP, CDC2, CDC20, CDC6, CDCA3, CDCA5, CDCA8, CENPE, CENPF, CEP55, ERCC6L, ESPL1, FAM83D, FBXO5, HELLS, HMGA2, KIF11, KIF15, KIF18A, KIF23, KIF2A, KIF2C, KIFC1, KLHL21, KNTC1, LATS2, LZTS2, MAD2L1, MAPRE2, NCAPG, NCAPG2, NCAPH, NDC80, NEK2, NUF2, NUSAP1, OIP5, PBK, PKMYT1, PLK1, PTTG1, RCC2, SAC3D1, SGOL1, SMC4, SPAG5, …	[AKAP8, ANAPC1, ANAPC10, ANAPC11, ANAPC13, ANAPC2, ANAPC4, ANAPC5, ANAPC7, ANLN, APC, ARHGEF2, ARL8A, ASPM, ATG3, AURKA, AURKB, BAX, BIRC5, BUB1, BUB1B, BUB3, C12orf11, C7orf11, CASC5, CCDC99, CCNA1, CCNA2, CCNB1, CCNB2, CCNF, CCNG1, CCNG2, CCNK, CD2AP, CDC16, CDC2, CDC20, CDC23, CDC25A, CDC25B, CDC26, CDC27, CDC6, CDCA2, CDCA3, CDCA5, CDCA8, CDK2, CDK3, CENPE, CENPF, CENPH, CEP164, CEP55, CEP63,…	[ANAPC10, ANLN, ASPM, AURKA, AURKB, BIRC5, BUB1, BUB1B, CCNA2, CCNB1, CCNB2, CD2AP, CDC2, CDC20, CDC6, CDCA3, CDCA5, CDCA8, CENPE, CENPF, CEP55, ERCC6L, ESPL1, FBXO5, HELLS, HMGA2, KIF11, KIF15, KIF18A, KIF23, KIF2A, KIF2C, KIFC1, KNTC1, MAD2L1, NCAPG, NCAPG2, NCAPH, NDC80, NEK2, NUF2, NUSAP1, OIP5, PBK, PKMYT1, PLK1, PTTG1, RCC2, SAC3D1, SGOL1, SMC4, SPAG5, SSSCA1, TIMELESS, TPX2, ZWILCH, ZWINT]	[FAM83D, KLHL21, LATS2, LZTS2, MAPRE2]	91.9355	8.06452	Specific for Cluster 1
GO:0030198	GO_BiologicalProcess_16.11.2010_17h17	extracellular matrix organization	34	33.6634	1.48015e-05	0.000230096	[ADAMTS2, C4orf31, CCDC80, COL12A1, COL14A1, COL19A1, COL1A2, COL3A1, COL4A2, COL4A3, COL4A4, COL4A6, COL6A2, COL8A2, CRISPLD2, CSGALNACT1, CTGF, CYR61, DCN, DPT, ECM2, EMILIN1, FOXF2, IHH, ILK, LAMC1, LUM, MIA, MMP9, MYH11, OLFML2A, RECK, SPINT1, TGFBR1]	[ADAMTS2, ADAMTS20, ADAMTS3, AGXT, ANXA2, ANXA2P2, APP, ATP7A, B4GALT1, B4GALT7, BCL3, BTF3L1, C4orf31, C6orf15, CCDC80, COL11A1, COL11A2, COL12A1, COL14A1, COL18A1, COL19A1, COL1A1, COL1A2, COL2A1, COL3A1, COL4A2, COL4A3, COL4A4, COL4A6, COL5A1, COL5A2, COL5A3, COL6A2, COL8A2, CRISPLD2, CSGALNACT1, CST3, CTGF, CYR61, DCN, DMTF1, DPT, ECM2, EGFLAM, ELF3, EMILIN1, ENG, ERCC2, FKBP1A, FOXC1, FOXC2,…	[IHH, MIA, MMP9, SPINT1]	[ADAMTS2, C4orf31, CCDC80, COL12A1, COL14A1, COL19A1, COL1A2, COL3A1, COL4A2, COL4A3, COL4A4, COL4A6, COL6A2, COL8A2, CRISPLD2, CSGALNACT1, CTGF, CYR61, DCN, DPT, ECM2, EMILIN1, FOXF2, ILK, LAMC1, LUM, MYH11, OLFML2A, RECK, TGFBR1]	11.7647	88.2353	Specific for Cluster 2
GO:0072001	GO_BiologicalProcess_16.11.2010_17h17	renal system development	38	32.2034	1.53019e-05	0.000230878	[ADAMTS1, AGTR1, ALDH1A2, ALDH9A1, ANGPT1, ARID5B, BCL2, BCL2L11, BMP4, BMP6, CA2, COL4A3, COL4A4, DCN, EYA1, FBN1, GLI2, HOXA11, ID3, KCNJ8, PAX8, PDGFRB, PKD2, RBP4, SERPINF1, SGPL1, SIX1, SIX2, SLIT2, TCF21, TGFBR1, THRA, TIMELESS, TP63, TSHZ3, VEGFA, WWTR1, ZBTB16]	[ACE, ACVR2B, ADAMTS1, AGTR1, AGXT, ALDH1A2, ALDH1A3, ALDH9A1, ANGPT1, APC, AQP11, ARID5B, ASS1, BASP1, BCL2, BCL2L11, BMP4, BMP6, BMP7, C1GALT1, CA2, CEP290, CITED1, COL4A3, COL4A4, CTNNB1, DCN, EGR1, EYA1, FBN1, FGF10, FGF8, FOXC1, FOXC2, FOXD1, FOXD2, FOXD3, FOXD4, FOXD4L1, FOXD4L3, FOXD4L4, FOXD4L5, FOXD4L6, GDF11, GDNF, GLI2, GLI3, GREM1, HNF1B, HOXA11, HOXC11, HOXD11, ID3, INVS, IRX1, ITGA8…	[BCL2L11, CA2, PAX8, SGPL1, SIX1, SIX2, TIMELESS, TP63, VEGFA, WWTR1]	[ADAMTS1, AGTR1, ALDH1A2, ALDH9A1, ANGPT1, ARID5B, BCL2, BMP4, BMP6, COL4A3, COL4A4, DCN, EYA1, FBN1, GLI2, HOXA11, ID3, KCNJ8, PDGFRB, PKD2, RBP4, SERPINF1, SLIT2, TCF21, TGFBR1, THRA, TSHZ3, ZBTB16]	26.3158	73.6842	Specific for Cluster 2
GO:0043068	GO_BiologicalProcess_16.11.2010_17h17	positive regulation of programmed cell death	109	23.8512	1.69154e-05	0.000241045	[ABL1, ADAMTSL4, ADIPOQ, AEN, ALDH1A2, ALOX12, APBB1, ARHGEF16, ARHGEF9, ATM, BAK1, BCL2, BCL2L11, BID, BIK, BMP4, BNIP3, CASP2, CASP3, CD24, CD70, CDK5R1, CIDEA, COL4A3, CRH, DAPK3, DCUN1D3, DDIT3, DEDD2, DHODH, DNM2, DUSP1, ECT2, EI24, EPHA7, FADD, FOXA1, GAL, GATA6, GRIK5, HOXA13, HTATIP2, ID3, IFI27, IGFBP3, IKBKE, IL1B, INDO, INHBA, ITGA1, JUN, LRRK2, MAP3K5, MLH1, MMP9, MSH2, MSX2, NACC1, N…	[AATF, ABL1, ABR, ACVR1B, ADAMTSL4, ADCY10, ADIPOQ, ADORA1, ADORA2A, ADRB2, AEN, AGTR2, AGXT, AIFM1, AIFM2, AIFM3, AKAP13, AKT1, ALDH1A2, ALDH1A3, ALOX12, ALOX15B, APBB1, APC, APH1A, APH1B, APOE, APP, ARHGAP4, ARHGEF11, ARHGEF12, ARHGEF16, ARHGEF17, ARHGEF18, ARHGEF2, ARHGEF3, ARHGEF4, ARHGEF6, ARHGEF7, ARHGEF9, ASCL1, ATM, B4GALT1, BAD, BAK1, BARD1, BAX, BBC3, BCL10, BCL2, BCL2L1, BCL2L11, BCL2L…	[ALOX12, ARHGEF16, BAK1, BCL2L11, BID, BIK, CASP2, CASP3, CD24, CD70, CDK5R1, CRH, DEDD2, DHODH, DNM2, ECT2, EI24, FADD, FOXA1, GAL, HTATIP2, IFI27, IGFBP3, IKBKE, INDO, INHBA, MAP3K5, MMP9, MSH2, NACC1, NGEF, NGFRAP1, OBSCN, PDCD6, PERP, PMAIP1, PRKDC, PRODH, PYCARD, SFN, SH3RF1, SMAD3, SMPD2, SOX4, STAT1, TFPT, TLR2, TNFRSF25, TNFSF10, TOP2A, TP53, TP53I3, TP63, TP73, TRAF3, TUBB2C, UBD, UNC13D…	[ABL1, ADAMTSL4, ADIPOQ, AEN, ALDH1A2, APBB1, ARHGEF9, ATM, BCL2, BMP4, BNIP3, CIDEA, COL4A3, DAPK3, DCUN1D3, DDIT3, DUSP1, EPHA7, GATA6, GRIK5, HOXA13, ID3, IL1B, ITGA1, JUN, LRRK2, MLH1, MSX2, NOTCH2, NR4A1, NUPR1, PDE5A, PLAGL1, PPP3CC, PRUNE2, RYR2, SFRP2, SFRP4, SLIT2, SQSTM1, TBX5, TGFB3, TGFBR1, TGM2, THBS1, TIAM2, TPD52L1, ZAK, ZBTB16]	55.0459	44.9541	Common
GO:0019220	GO_BiologicalProcess_16.11.2010_17h17	regulation of phosphate metabolic process	129	23.0769	1.64534e-05	0.00024116	[ADCY5, ADIPOQ, ADORA2B, ADRA2A, ANG, ANGPT1, ATXN1, AXIN2, BCL2, BDKRB1, BDKRB2, BMP4, BMP6, C5, CAMKK2, CASP3, CBLC, CCNB1, CCND1, CCND2, CCNE2, CD24, CDC25C, CDC6, CDK5R1, CDK7, CDKN2B, CDKN3, CENPE, CERK, CHEK1, CKS1B, CKS2, CNKSR3, CTGF, DAB2, DGKA, DGKB, DGKZ, DUSP16, DUSP3, DUSP8, DUSP9, EDN2, EDNRA, ENPP1, ERBB2, EREG, FAM129A, FGF13, FGF7, FZD1, FZD7, GADD45B, GADD45G, GHR, GNAQ, HSPA5, …	[ACVR1B, ACVR2B, ADAM17, ADAM9, ADCY1, ADCY2, ADCY4, ADCY5, ADCY6, ADCY7, ADCY8, ADIPOQ, ADNP, ADORA1, ADORA2A, ADORA2B, ADRA2A, ADRA2B, ADRA2C, ADRB2, AGK, AGTR2, AGXT, AIDA, AKAP1, AKAP5, AKT1, AKT1S1, AKT2, AKTIP, ALS2, ANAPC2, ANG, ANGPT1, ANGPT4, ANKRD54, APC, APOA1, APOE, APP, ARR3, ARTN, ATP7A, ATXN1, AXIN1, AXIN2, AZU1, BARD1, BCCIP, BCL10, BCL2, BDKRB1, BDKRB2, BIRC7, BLM, BMP10, BMP2, B…	[ADORA2B, CASP3, CBLC, CCNB1, CCND1, CCNE2, CD24, CDC25C, CDC6, CDK5R1, CDK7, CDKN3, CENPE, CHEK1, CKS1B, CKS2, DGKA, DGKZ, DUSP9, EDN2, ERBB2, EREG, HSPA5, IGFBP3, INHBA, IRAK1, ITGA2, LPAR2, LPAR3, MAP3K5, MCM7, MDFI, NPM1, PKIA, PKIB, PKMYT1, PPP1R14C, PRKCZ, S100A9, SFN, SMAD3, SPHK2, SPRY4, SRPX2, TARBP2, TGFA, TP53, TP73, TPX2, TRAF4, TRIB3, TTK, VAV2, VAV3, VEGFA]	[ADCY5, ADIPOQ, ADRA2A, ANG, ANGPT1, ATXN1, AXIN2, BCL2, BDKRB1, BDKRB2, BMP4, BMP6, C5, CAMKK2, CCND2, CDKN2B, CERK, CNKSR3, CTGF, DAB2, DGKB, DUSP16, DUSP3, DUSP8, EDNRA, ENPP1, FAM129A, FGF13, FGF7, FZD1, FZD7, GADD45B, GADD45G, GHR, GNAQ, IGF1, IL1B, ILK, ITGA1, ITGA5, JUN, KAT2B, KITLG, LATS2, LRRK2, MAP3K6, MS4A1, NCKAP1L, PDGFRB, PKIG, PKN1, PPAP2B, PPP1R14A, PRKACB, PRKAG2, PRKAR2B, RBPMS…	42.6357	57.3643	Common
GO:0051174	GO_BiologicalProcess_16.11.2010_17h17	regulation of phosphorus metabolic process	129	23.0769	1.64534e-05	0.00024116	[ADCY5, ADIPOQ, ADORA2B, ADRA2A, ANG, ANGPT1, ATXN1, AXIN2, BCL2, BDKRB1, BDKRB2, BMP4, BMP6, C5, CAMKK2, CASP3, CBLC, CCNB1, CCND1, CCND2, CCNE2, CD24, CDC25C, CDC6, CDK5R1, CDK7, CDKN2B, CDKN3, CENPE, CERK, CHEK1, CKS1B, CKS2, CNKSR3, CTGF, DAB2, DGKA, DGKB, DGKZ, DUSP16, DUSP3, DUSP8, DUSP9, EDN2, EDNRA, ENPP1, ERBB2, EREG, FAM129A, FGF13, FGF7, FZD1, FZD7, GADD45B, GADD45G, GHR, GNAQ, HSPA5, …	[ACVR1B, ACVR2B, ADAM17, ADAM9, ADCY1, ADCY2, ADCY4, ADCY5, ADCY6, ADCY7, ADCY8, ADIPOQ, ADNP, ADORA1, ADORA2A, ADORA2B, ADRA2A, ADRA2B, ADRA2C, ADRB2, AGK, AGTR2, AGXT, AIDA, AKAP1, AKAP5, AKT1, AKT1S1, AKT2, AKTIP, ALS2, ANAPC2, ANG, ANGPT1, ANGPT4, ANKRD54, APC, APOA1, APOE, APP, ARR3, ARTN, ATP7A, ATXN1, AXIN1, AXIN2, AZU1, BARD1, BCCIP, BCL10, BCL2, BDKRB1, BDKRB2, BIRC7, BLM, BMP10, BMP2, B…	[ADORA2B, CASP3, CBLC, CCNB1, CCND1, CCNE2, CD24, CDC25C, CDC6, CDK5R1, CDK7, CDKN3, CENPE, CHEK1, CKS1B, CKS2, DGKA, DGKZ, DUSP9, EDN2, ERBB2, EREG, HSPA5, IGFBP3, INHBA, IRAK1, ITGA2, LPAR2, LPAR3, MAP3K5, MCM7, MDFI, NPM1, PKIA, PKIB, PKMYT1, PPP1R14C, PRKCZ, S100A9, SFN, SMAD3, SPHK2, SPRY4, SRPX2, TARBP2, TGFA, TP53, TP73, TPX2, TRAF4, TRIB3, TTK, VAV2, VAV3, VEGFA]	[ADCY5, ADIPOQ, ADRA2A, ANG, ANGPT1, ATXN1, AXIN2, BCL2, BDKRB1, BDKRB2, BMP4, BMP6, C5, CAMKK2, CCND2, CDKN2B, CERK, CNKSR3, CTGF, DAB2, DGKB, DUSP16, DUSP3, DUSP8, EDNRA, ENPP1, FAM129A, FGF13, FGF7, FZD1, FZD7, GADD45B, GADD45G, GHR, GNAQ, IGF1, IL1B, ILK, ITGA1, ITGA5, JUN, KAT2B, KITLG, LATS2, LRRK2, MAP3K6, MS4A1, NCKAP1L, PDGFRB, PKIG, PKN1, PPAP2B, PPP1R14A, PRKACB, PRKAG2, PRKAR2B, RBPMS…	42.6357	57.3643	Common
GO:0048514	GO_BiologicalProcess_16.11.2010_17h17	blood vessel morphogenesis	58	27.7512	1.98456e-05	0.000275157	[ACVR1, ACVRL1, ANG, ANGPT1, ARHGAP24, BMP4, CEACAM1, COL15A1, COL8A2, CTGF, CXCL17, CYR61, EDNRA, ENPEP, EREG, FGF13, FGF9, FGFR1, FIGF, FN1, FZD4, HAND1, HAND2, HHEX, HOXA13, HOXB3, HSPG2, ID1, IHH, ITGA5, ITGA7, JUN, KLF5, MEOX2, MMP14, NOTCH4, PLAU, PRRX1, RBPJ, ROBO4, RTN4, S100A7, SFRP2, SGPL1, SLIT2, SMAD7, SOX17, SOX18, SRF, SRPX2, TGFBR1, THBS1, TNFRSF12A, TYMP, VAV2, VAV3, VEGFA, WASF2]	[AAMP, ACVR1, ACVRL1, ADAM15, ADRA2B, AGGF1, AMOT, ANG, ANGPT1, ANGPTL3, ANGPTL6, ANPEP, ANXA2, ANXA2P2, APOB, APOE, APOLD1, ARHGAP22, ARHGAP24, ATP5B, ATPIF1, B4GALT1, BMP4, BMPER, C1GALT1, CASP8, CAV1, CCBE1, CCM2, CDH13, CDH2, CEACAM1, CITED1, COL15A1, COL18A1, COL4A1, COL8A1, COL8A2, CSPG4, CTGF, CTNNB1, CUL7, CX3CL1, CXCL17, CYR61, DICER1, DLL4, EDN1, EDNRA, EGF, EGFL7, ELK3, ENG, ENPEP, EPA…	[CEACAM1, CXCL17, EREG, HOXB3, ID1, IHH, KLF5, MMP14, PLAU, S100A7, SGPL1, SRPX2, TYMP, VAV2, VAV3, VEGFA]	[ACVR1, ACVRL1, ANG, ANGPT1, ARHGAP24, BMP4, COL15A1, COL8A2, CTGF, CYR61, EDNRA, ENPEP, FGF13, FGF9, FGFR1, FIGF, FN1, FZD4, HAND1, HAND2, HHEX, HOXA13, HSPG2, ITGA5, ITGA7, JUN, MEOX2, NOTCH4, PRRX1, RBPJ, ROBO4, RTN4, SFRP2, SLIT2, SMAD7, SOX17, SOX18, SRF, TGFBR1, THBS1, TNFRSF12A, WASF2]	27.5862	72.4138	Specific for Cluster 2
GO:0031570	GO_BiologicalProcess_16.11.2010_17h17	DNA integrity checkpoint	24	38.0952	2.68093e-05	0.000361925	[ANTXR1, ATM, BRCC3, CCNA2, CCND1, CDC2, CDC45L, CDC6, CDT1, CHEK1, DGKZ, DTL, FAM175A, FOXN3, MSH2, PLK1, RBM38, RFWD3, RINT1, RRAD, TP53, TP63, TP73, ZAK]	[ANTXR1, ARTN, ATM, ATRIP, BLM, BRCA1, BRCC3, BRE, BRIP1, BRSK1, CCNA2, CCND1, CCNG1, CDC14B, CDC2, CDC45L, CDC6, CDT1, CEP63, CHEK1, CHEK2, CLSPN, DGKZ, DTL, FAM175A, FBXO31, FBXO6, FOXN3, FOXO4, FZR1, GML, GTSE1, H2AFX, HUS1, MDC1, MIZF, MSH2, NAE1, NEK11, PAK3, PLK1, PML, PPP2R5C, PTPN11, RAD17, RAD9A, RBM38, RFWD3, RINT1, RPA4, RPS27L, RRAD, STRA8, TIPIN, TIPRL, TP53, TP63, TP73, TRIAP1, UIMC…	[BRCC3, CCNA2, CCND1, CDC2, CDC45L, CDC6, CDT1, CHEK1, DGKZ, DTL, MSH2, PLK1, RFWD3, TP53, TP63, TP73]	[ANTXR1, ATM, FAM175A, FOXN3, RBM38, RINT1, RRAD, ZAK]	66.6667	33.3333	Specific for Cluster 1
GO:0030335	GO_BiologicalProcess_16.11.2010_17h17	positive regulation of cell migration	41	30.597	2.83449e-05	0.000372845	[ADRA2A, ALOX12, ANGPT1, BCL2, BDKRB1, BMP4, CCL11, CREB3L4, CTSH, CXCL10, CXCL12, EDN2, EPB41L5, FAM110A, FGF13, FGF7, FIGF, FURIN, ICAM1, IGF1, ILK, ITGA2, MMP9, NCKAP1L, ONECUT2, P2RY2, P2RY6, PDGFRB, PPAP2B, RORA, S100A7, SELE, SMAD3, SNAI1, SRPX2, TAC1, THBS1, THBS4, TLR2, VEGFA, VEGFB]	[AAMP, ADAM10, ADAM17, ADAM9, ADRA2A, AGXT, AKT2, ALOX12, AMOT, ANGPT1, ANGPT4, ANGPTL3, ANXA3, APC, ARHGAP5, BCAR1, BCL2, BDKRB1, BMP4, BMPR2, C3AR1, C5AR1, CBLL1, CCL11, CCL24, CCL26, CDH13, COL18A1, COL1A1, CORO1A, CREB3L4, CSF1, CTSH, CXCL10, CXCL12, CXCL16, DRD1, EDN1, EDN2, EDN3, EGFR, EPB41L5, ERBB4, F2R, F2RL1, F3, F7, FAM110A, FGF10, FGF13, FGF7, FGFR1OP, FIGF, FLT1, FURIN, HBEGF, HDAC6,…	[ALOX12, CREB3L4, CTSH, CXCL10, EDN2, FAM110A, FURIN, ITGA2, MMP9, ONECUT2, P2RY2, P2RY6, S100A7, SMAD3, SRPX2, TAC1, TLR2, VEGFA]	[ADRA2A, ANGPT1, BCL2, BDKRB1, BMP4, CCL11, CXCL12, EPB41L5, FGF13, FGF7, FIGF, ICAM1, IGF1, ILK, NCKAP1L, PDGFRB, PPAP2B, RORA, SELE, SNAI1, THBS1, THBS4, VEGFB]	43.9024	56.0976	Common
GO:2000147	GO_BiologicalProcess_16.11.2010_17h17	positive regulation of cell motility	41	30.597	2.83449e-05	0.000372845	[ADRA2A, ALOX12, ANGPT1, BCL2, BDKRB1, BMP4, CCL11, CREB3L4, CTSH, CXCL10, CXCL12, EDN2, EPB41L5, FAM110A, FGF13, FGF7, FIGF, FURIN, ICAM1, IGF1, ILK, ITGA2, MMP9, NCKAP1L, ONECUT2, P2RY2, P2RY6, PDGFRB, PPAP2B, RORA, S100A7, SELE, SMAD3, SNAI1, SRPX2, TAC1, THBS1, THBS4, TLR2, VEGFA, VEGFB]	[AAMP, ADAM10, ADAM17, ADAM9, ADRA2A, AGXT, AKT2, ALOX12, AMOT, ANGPT1, ANGPT4, ANGPTL3, ANXA3, APC, ARHGAP5, BCAR1, BCL2, BDKRB1, BMP4, BMPR2, C3AR1, C5AR1, CBLL1, CCL11, CCL24, CCL26, CDH13, COL18A1, COL1A1, CORO1A, CREB3L4, CSF1, CTSH, CXCL10, CXCL12, CXCL16, DRD1, EDN1, EDN2, EDN3, EGFR, EPB41L5, ERBB4, F2R, F2RL1, F3, F7, FAM110A, FGF10, FGF13, FGF7, FGFR1OP, FIGF, FLT1, FURIN, HBEGF, HDAC6,…	[ALOX12, CREB3L4, CTSH, CXCL10, EDN2, FAM110A, FURIN, ITGA2, MMP9, ONECUT2, P2RY2, P2RY6, S100A7, SMAD3, SRPX2, TAC1, TLR2, VEGFA]	[ADRA2A, ANGPT1, BCL2, BDKRB1, BMP4, CCL11, CXCL12, EPB41L5, FGF13, FGF7, FIGF, ICAM1, IGF1, ILK, NCKAP1L, PDGFRB, PPAP2B, RORA, SELE, SNAI1, THBS1, THBS4, VEGFB]	43.9024	56.0976	Common
GO:0051272	GO_BiologicalProcess_16.11.2010_17h17	positive regulation of cellular component movement	43	30.0699	2.92287e-05	0.000374858	[ADRA2A, ALOX12, ANGPT1, BCL2, BDKRB1, BMP4, CCL11, CREB3L4, CTSH, CXCL10, CXCL12, EDN2, EPB41L5, FAM110A, FGF13, FGF7, FIGF, FURIN, ICAM1, IGF1, ILK, ITGA2, MMP9, NCKAP1L, ONECUT2, P2RY2, P2RY6, PDGFRB, PPAP2B, RORA, S100A7, SELE, SMAD3, SNAI1, SRPX2, STAT5B, TAC1, TGFBR1, THBS1, THBS4, TLR2, VEGFA, VEGFB]	[AAMP, ACTN4, ADAM10, ADAM17, ADAM9, ADRA2A, AGXT, AKT2, ALOX12, AMOT, ANGPT1, ANGPT4, ANGPTL3, ANXA3, APC, ARHGAP5, BCAR1, BCL2, BCL6, BDKRB1, BMP4, BMPR2, C3AR1, C5AR1, CBLL1, CCL11, CCL24, CCL26, CDH13, CHST3, COL18A1, COL1A1, CORO1A, CREB3L4, CSF1, CTSH, CXCL10, CXCL12, CXCL16, DRD1, EDN1, EDN2, EDN3, EGFR, EPB41L5, ERBB4, ETS1, F2R, F2RL1, F3, F7, FAM110A, FGF10, FGF13, FGF7, FGFR1OP, FIGF, …	[ALOX12, CREB3L4, CTSH, CXCL10, EDN2, FAM110A, FURIN, ITGA2, MMP9, ONECUT2, P2RY2, P2RY6, S100A7, SMAD3, SRPX2, TAC1, TLR2, VEGFA]	[ADRA2A, ANGPT1, BCL2, BDKRB1, BMP4, CCL11, CXCL12, EPB41L5, FGF13, FGF7, FIGF, ICAM1, IGF1, ILK, NCKAP1L, PDGFRB, PPAP2B, RORA, SELE, SNAI1, STAT5B, TGFBR1, THBS1, THBS4, VEGFB]	41.8605	58.1395	Common
GO:0043065	GO_BiologicalProcess_16.11.2010_17h17	positive regulation of apoptosis	107	23.5683	3.43993e-05	0.000430411	[ABL1, ADAMTSL4, ADIPOQ, AEN, ALDH1A2, ALOX12, APBB1, ARHGEF16, ARHGEF9, ATM, BAK1, BCL2, BCL2L11, BID, BIK, BMP4, BNIP3, CASP2, CASP3, CD24, CD70, CDK5R1, CIDEA, COL4A3, CRH, DAPK3, DCUN1D3, DDIT3, DEDD2, DHODH, DNM2, DUSP1, ECT2, EI24, EPHA7, FADD, FOXA1, GAL, GATA6, HOXA13, HTATIP2, ID3, IFI27, IGFBP3, IKBKE, IL1B, INDO, INHBA, ITGA1, JUN, MAP3K5, MLH1, MMP9, MSH2, MSX2, NACC1, NGEF, NGFRAP1, …	[AATF, ABL1, ABR, ACVR1B, ADAMTSL4, ADCY10, ADIPOQ, ADORA1, ADORA2A, ADRB2, AEN, AGTR2, AGXT, AIFM1, AIFM2, AIFM3, AKAP13, AKT1, ALDH1A2, ALDH1A3, ALOX12, ALOX15B, APBB1, APC, APH1A, APH1B, APOE, APP, ARHGAP4, ARHGEF11, ARHGEF12, ARHGEF16, ARHGEF17, ARHGEF18, ARHGEF2, ARHGEF3, ARHGEF4, ARHGEF6, ARHGEF7, ARHGEF9, ASCL1, ATM, B4GALT1, BAD, BAK1, BARD1, BAX, BBC3, BCL10, BCL2, BCL2L1, BCL2L11, BCL2L…	[ALOX12, ARHGEF16, BAK1, BCL2L11, BID, BIK, CASP2, CASP3, CD24, CD70, CDK5R1, CRH, DEDD2, DHODH, DNM2, ECT2, EI24, FADD, FOXA1, GAL, HTATIP2, IFI27, IGFBP3, IKBKE, INDO, INHBA, MAP3K5, MMP9, MSH2, NACC1, NGEF, NGFRAP1, OBSCN, PDCD6, PERP, PMAIP1, PRKDC, PRODH, PYCARD, SFN, SH3RF1, SMAD3, SMPD2, SOX4, STAT1, TFPT, TLR2, TNFRSF25, TNFSF10, TOP2A, TP53, TP53I3, TP63, TP73, TRAF3, TUBB2C, UBD, UNC13D…	[ABL1, ADAMTSL4, ADIPOQ, AEN, ALDH1A2, APBB1, ARHGEF9, ATM, BCL2, BMP4, BNIP3, CIDEA, COL4A3, DAPK3, DCUN1D3, DDIT3, DUSP1, EPHA7, GATA6, HOXA13, ID3, IL1B, ITGA1, JUN, MLH1, MSX2, NOTCH2, NR4A1, NUPR1, PDE5A, PLAGL1, PPP3CC, PRUNE2, RYR2, SFRP2, SFRP4, SLIT2, SQSTM1, TBX5, TGFB3, TGFBR1, TGM2, THBS1, TIAM2, TPD52L1, ZAK, ZBTB16]	56.0748	43.9252	Common
GO:0045137	GO_BiologicalProcess_16.11.2010_17h17	development of primary sexual characteristics	45	29.4118	3.54456e-05	0.000432943	[ADAMTS1, ANG, ANGPT1, BCL2, BCL2L11, BIK, BMP4, BMP6, C17orf28, CCND1, CCND2, CCNE1, CHD7, DHCR24, EDN2, EREG, ERMP1, ESR1, FANCA, FGF7, FGF9, GATA6, GJB2, HOXA13, INHBA, JAG2, KITLG, MGST1, MMP14, MSH2, PATZ1, PGR, RBP4, SDC1, SGPL1, SLIT2, SLIT3, SOX2, STAT5B, TAF4, TFAP2C, TP63, VEGFA, WNT10A, WNT2B]	[ACSBG1, ACVR1B, ACVR2A, ADAMTS1, AGXT, AMH, ANG, ANGPT1, ANKRD7, AREG, ASB1, BCL2, BCL2L1, BCL2L11, BIK, BMP15, BMP4, BMP5, BMP6, BMPR1B, BRCA2, C17orf28, CAPN5, CBX2, CCND1, CCND2, CCNE1, CENPI, CHD7, CHGA, CSDA, CSDE1, CTNNB1, DHCR24, DHH, DMRT1, DMRT2, EDN2, EIF2B2, EIF2B4, EIF2B5, EREG, ERMP1, ESR1, ESR2, FANCA, FANCG, FGF10, FGF7, FGF8, FGF9, FNDC3A, FOXC1, FOXL2, FOXO3, FSHB, FSHR, FST, GA…	[BCL2L11, BIK, C17orf28, CCND1, CCNE1, CHD7, DHCR24, EDN2, EREG, ERMP1, FANCA, GJB2, INHBA, JAG2, MGST1, MMP14, MSH2, PATZ1, SDC1, SGPL1, SOX2, TAF4, TFAP2C, TP63, VEGFA, WNT10A]	[ADAMTS1, ANG, ANGPT1, BCL2, BMP4, BMP6, CCND2, ESR1, FGF7, FGF9, GATA6, HOXA13, KITLG, PGR, RBP4, SLIT2, SLIT3, STAT5B, WNT2B]	57.7778	42.2222	Common
GO:0030323	GO_BiologicalProcess_16.11.2010_17h17	respiratory tube development	34	32.3809	3.71005e-05	0.000442618	[ADAMTS2, ALDH1A2, BMP4, CRH, CTGF, CTSH, DHCR7, FGF13, FGF7, FGF9, FGFR1, FOXA1, FOXA2, FOXJ1, FOXP1, GATA6, GLI2, HHEX, ID1, IGF1, LOC441376, MGP, MMP14, RBP4, SOX2, TBX5, TCF21, TGFB3, TGFBR1, THRA, TIMELESS, TRAF4, TSHZ3, VEGFA]	[ACVR2B, ADA, ADAMTS2, ALDH1A2, ASCL1, ATP7A, BMP4, BMPR1A, BMPR2, C11orf73, C21orf33, CEBPA, CFTR, CLCN2, CRH, CTGF, CTNNB1, CTSH, CTSZ, CUX1, CYP1A2, DAG1, DHCR7, DICER1, EP300, EPAS1, ERRFI1, FGF1, FGF10, FGF13, FGF18, FGF7, FGF9, FGFR1, FOXA1, FOXA2, FOXJ1, FOXP1, FOXP2, GATA6, GLI1, GLI2, GLI3, HECA, HHEX, HHIP, HOXA5, HS6ST1, HSD11B1, ID1, IFT88, IGF1, JMJD6, KDR, KGFLP1, KGFLP2, LAMA1, LAM…	[CRH, CTSH, DHCR7, FOXA1, FOXA2, FOXJ1, ID1, MMP14, SOX2, TIMELESS, TRAF4, VEGFA]	[ADAMTS2, ALDH1A2, BMP4, CTGF, FGF13, FGF7, FGF9, FGFR1, FOXP1, GATA6, GLI2, HHEX, IGF1, LOC441376, MGP, RBP4, TBX5, TCF21, TGFB3, TGFBR1, THRA, TSHZ3]	35.2941	64.7059	Common
GO:0000279	GO_BiologicalProcess_16.11.2010_17h17	M phase	84	24.7059	4.14467e-05	0.000472492	[ANAPC10, ANLN, ASPM, ATM, AURKA, AURKB, BIRC5, BUB1, BUB1B, C17orf28, CCNA2, CCNB1, CCNB2, CD2AP, CDC2, CDC20, CDC25C, CDC6, CDCA3, CDCA5, CDCA8, CENPE, CENPF, CEP55, CHEK1, CKS2, CPEB1, ERCC4, ERCC6L, EREG, ESPL1, EXO1, FAM83D, FANCA, FBXO5, HELLS, HMGA2, HSPA2, KIF11, KIF15, KIF18A, KIF23, KIF2A, KIF2C, KIFC1, KLHL21, KNTC1, LATS2, LZTS2, MAD2L1, MAPRE2, MLH1, MND1, MPHOSPH6, MSH2, NCAPG, NCAP…	[ADCY8, AKAP8, ANAPC1, ANAPC10, ANAPC11, ANAPC13, ANAPC2, ANAPC4, ANAPC5, ANAPC7, ANLN, APC, ARHGEF2, ARL8A, ARTN, ASPM, ASZ1, ATM, AURKA, AURKB, BIRC5, BOLL, BRCA2, BUB1, BUB1B, BUB3, C12orf11, C16orf73, C17orf28, C7orf11, CASC5, CCDC99, CCNA1, CCNA2, CCNB1, CCNB1IP1, CCNB2, CCNB3, CCNF, CCNG1, CCNG2, CCNK, CD2AP, CDC16, CDC2, CDC20, CDC23, CDC25A, CDC25B, CDC25C, CDC26, CDC27, CDC6, CDCA2, CDCA…	[ANAPC10, ANLN, ASPM, AURKA, AURKB, BIRC5, BUB1, BUB1B, C17orf28, CCNA2, CCNB1, CCNB2, CD2AP, CDC2, CDC20, CDC25C, CDC6, CDCA3, CDCA5, CDCA8, CENPE, CENPF, CEP55, CHEK1, CKS2, ERCC6L, EREG, ESPL1, EXO1, FANCA, FBXO5, HELLS, HMGA2, KIF11, KIF15, KIF18A, KIF23, KIF2A, KIF2C, KIFC1, KNTC1, MAD2L1, MND1, MPHOSPH6, MSH2, NCAPG, NCAPG2, NCAPH, NDC80, NEK2, NUF2, NUSAP1, OIP5, PBK, PKMYT1, PLK1, PRC1, P…	[ATM, CPEB1, ERCC4, FAM83D, HSPA2, KLHL21, LATS2, LZTS2, MAPRE2, MLH1, RRAD]	86.9048	13.0952	Specific for Cluster 1
GO:0001822	GO_BiologicalProcess_16.11.2010_17h17	kidney development	36	31.5789	4.06565e-05	0.000474018	[ADAMTS1, AGTR1, ALDH1A2, ALDH9A1, ANGPT1, ARID5B, BCL2, BCL2L11, BMP4, BMP6, CA2, COL4A3, COL4A4, DCN, EYA1, FBN1, GLI2, HOXA11, ID3, KCNJ8, PAX8, PDGFRB, PKD2, SERPINF1, SGPL1, SIX1, SIX2, SLIT2, TCF21, TGFBR1, THRA, TIMELESS, TSHZ3, VEGFA, WWTR1, ZBTB16]	[ACE, ACVR2B, ADAMTS1, AGTR1, AGXT, ALDH1A2, ALDH1A3, ALDH9A1, ANGPT1, APC, AQP11, ARID5B, ASS1, BASP1, BCL2, BCL2L11, BMP4, BMP6, BMP7, C1GALT1, CA2, CEP290, CITED1, COL4A3, COL4A4, CTNNB1, DCN, EGR1, EYA1, FBN1, FGF10, FGF8, FOXC1, FOXC2, FOXD1, FOXD2, FOXD3, FOXD4, FOXD4L1, FOXD4L3, FOXD4L4, FOXD4L5, FOXD4L6, GDF11, GDNF, GLI2, GLI3, GREM1, HNF1B, HOXA11, HOXC11, HOXD11, ID3, INVS, IRX1, ITGA8…	[BCL2L11, CA2, PAX8, SGPL1, SIX1, SIX2, TIMELESS, VEGFA, WWTR1]	[ADAMTS1, AGTR1, ALDH1A2, ALDH9A1, ANGPT1, ARID5B, BCL2, BMP4, BMP6, COL4A3, COL4A4, DCN, EYA1, FBN1, GLI2, HOXA11, ID3, KCNJ8, PDGFRB, PKD2, SERPINF1, SLIT2, TCF21, TGFBR1, THRA, TSHZ3, ZBTB16]	25	75	Specific for Cluster 2
GO:0051259	GO_BiologicalProcess_16.11.2010_17h17	protein oligomerization	53	27.7487	4.45262e-05	0.000496564	[ADIPOQ, ANGPT1, ATL1, ATL3, BIRC3, C1QTNF1, C1QTNF7, CBR4, CDH1, COASY, COL1A2, COLEC12, CRYAB, CUTC, FADD, GLRB, GPX3, HRAS, ILK, IRAK1, ITPR3, JUP, KCNA5, KCNH2, LNX1, MUC20, NACC1, NLGN1, NPM1, OLFM1, P2RX1, PARVA, PCBD1, PDSS1, PEX14, PFKL, PRKAA2, PRKCZ, RRM1, RRM2, S100A9, SCARA5, SRR, STOM, TAF10, TGM2, TK1, TP53, TP63, TRIM27, TSC2, UPK1A, UQCRH]	[AASS, ACTN2, ADIPOQ, ADSL, AKR1C1, ALAD, ALDH5A1, ALDOC, ALOX5AP, AMFR, ANGPT1, ANGPTL4, ANXA5, AQP11, ATG16L1, ATL1, ATL2, ATL3, ATPIF1, BAX, BCL10, BIRC2, BIRC3, BLM, BRAF, C10orf2, C1QTNF1, C1QTNF2, C1QTNF7, CASP8, CAT, CAV1, CAV2, CBR4, CCDC88C, CDA, CDH1, CDH2, CEP57, CNTF, COASY, COL1A1, COL1A2, COLEC12, CPT1A, CRYAA, CRYAB, CRYZ, CTNNB1, CUTC, DECR1, DGKD, DGKH, DHPS, DPAGT1, DPYS, EIF2AK…	[ATL3, BIRC3, CBR4, CDH1, COASY, FADD, HRAS, IRAK1, ITPR3, JUP, LNX1, MUC20, NACC1, NPM1, PCBD1, PDSS1, PFKL, PRKCZ, RRM1, RRM2, S100A9, TAF10, TK1, TP53, TP63, TRIM27, UQCRH]	[ADIPOQ, ANGPT1, ATL1, C1QTNF1, C1QTNF7, COL1A2, COLEC12, CRYAB, CUTC, GLRB, GPX3, ILK, KCNA5, KCNH2, NLGN1, OLFM1, P2RX1, PARVA, PEX14, PRKAA2, SCARA5, SRR, STOM, TGM2, TSC2, UPK1A]	50.9434	49.0566	Common
GO:0030324	GO_BiologicalProcess_16.11.2010_17h17	lung development	33	32.3529	4.8933e-05	0.000534098	[ADAMTS2, ALDH1A2, BMP4, CRH, CTGF, CTSH, DHCR7, FGF13, FGF7, FGF9, FGFR1, FOXA1, FOXA2, FOXJ1, FOXP1, GATA6, GLI2, HHEX, ID1, IGF1, LOC441376, MGP, MMP14, RBP4, SOX2, TBX5, TCF21, TGFB3, TGFBR1, THRA, TIMELESS, TSHZ3, VEGFA]	[ACVR2B, ADA, ADAMTS2, ALDH1A2, ASCL1, ATP7A, BMP4, BMPR1A, BMPR2, C11orf73, C21orf33, CEBPA, CFTR, CLCN2, CRH, CTGF, CTNNB1, CTSH, CTSZ, CUX1, CYP1A2, DAG1, DHCR7, DICER1, EP300, EPAS1, ERRFI1, FGF1, FGF10, FGF13, FGF18, FGF7, FGF9, FGFR1, FOXA1, FOXA2, FOXJ1, FOXP1, FOXP2, GATA6, GLI1, GLI2, GLI3, HHEX, HHIP, HOXA5, HS6ST1, HSD11B1, ID1, IFT88, IGF1, JMJD6, KDR, KGFLP1, KGFLP2, LAMA1, LAMA5, LI…	[CRH, CTSH, DHCR7, FOXA1, FOXA2, FOXJ1, ID1, MMP14, SOX2, TIMELESS, VEGFA]	[ADAMTS2, ALDH1A2, BMP4, CTGF, FGF13, FGF7, FGF9, FGFR1, FOXP1, GATA6, GLI2, HHEX, IGF1, LOC441376, MGP, RBP4, TBX5, TCF21, TGFB3, TGFBR1, THRA, TSHZ3]	33.3333	66.6667	Specific for Cluster 2
GO:0002685	GO_BiologicalProcess_16.11.2010_17h17	regulation of leukocyte migration	17	42.5	8.01416e-05	0.000839034	[BDKRB1, C5, CXCL10, CXCL12, EDN2, FIGF, ICAM1, ITGA2, NCKAP1L, S100A7, SELE, SLIT2, THBS1, THBS4, TLR2, VEGFA, VEGFB]	[ADA, ADAM10, ADAM17, ADORA1, BDKRB1, C3AR1, C5, C5AR1, CXCL10, CXCL12, EDN2, EDN3, F2RL1, F7, FIGF, GREM1, HOXA7, ICAM1, IL6, IL6R, ITGA2, KIF20B, LBP, MADCAM1, MIA3, NCKAP1L, NOD2, S100A11P, S100A7, SELE, SEPP1, SERPINE1, SLIT2, THBS1, THBS4, TLR2, VEGFA, VEGFB, VEGFC, WNT5A]	[CXCL10, EDN2, ITGA2, S100A7, TLR2, VEGFA]	[BDKRB1, C5, CXCL12, FIGF, ICAM1, NCKAP1L, SELE, SLIT2, THBS1, THBS4, VEGFB]	35.2941	64.7059	Common
GO:0050678	GO_BiologicalProcess_16.11.2010_17h17	regulation of epithelial cell proliferation	40	29.6296	7.86004e-05	0.000840042	[ALDH1A2, ANG, ANGPT1, BMP4, CCL11, CCL2, CCND2, CDKN2B, ECM1, EDNRA, ERBB2, EREG, ETV4, FGF13, FGF7, FGF9, FOXP1, FZD7, GAS1, IGF1, IHH, KRT4, LAMC1, NME1, PGR, PTCH1, SERPINF1, SFRP2, SMAD3, SOX2, TGFA, TGFBR3, THBS1, THBS4, TSC2, VASH2, VEGFA, VEGFB, WDR77, WFDC1]	[AGGF1, ALDH1A2, ANG, ANGPT1, APC, APOE, APOH, AREG, ARNT, ATP5A1, ATPIF1, B4GALT1, BMP2, BMP4, BMPR1A, BMPR2, BRCA2, CAV1, CAV2, CCL11, CCL2, CCL24, CCL26, CCND2, CCR3, CDH13, CDK6, CDKN1C, CDKN2B, CTNNB1, CYP7B1, DEAF1, DLX5, DLX6, ECM1, EDNRA, EGFR, ENG, EPGN, ERBB2, ERBB4, EREG, ESR2, ETV4, F3, FGF1, FGF10, FGF13, FGF7, FGF9, FOXE3, FOXP1, FOXP2, FOXP3, FRAP1, FRS2, FZD7, GAS1, GHRL, GPX1, GR…	[ERBB2, EREG, ETV4, IHH, KRT4, NME1, SMAD3, SOX2, TGFA, VASH2, VEGFA, WDR77]	[ALDH1A2, ANG, ANGPT1, BMP4, CCL11, CCL2, CCND2, CDKN2B, ECM1, EDNRA, FGF13, FGF7, FGF9, FOXP1, FZD7, GAS1, IGF1, LAMC1, PGR, PTCH1, SERPINF1, SFRP2, TGFBR3, THBS1, THBS4, TSC2, VEGFB, WFDC1]	30	70	Specific for Cluster 2
GO:0030308	GO_BiologicalProcess_16.11.2010_17h17	negative regulation of cell growth	33	31.4286	9.28551e-05	0.000952693	[ACVRL1, APBB1, BCL2, BDKRB1, CRYAB, DAB2, DCUN1D3, EI24, ENO1, ENPP1, FGF13, INHBA, NPR1, NTN1, OSGIN1, RBBP7, RERG, RRAD, RTN4, SCGB3A1, SEMA3F, SFRP2, SLIT2, SLIT3, SMAD3, SOX17, SPP1, TNK1, TP53, TP63, TP73, TSPYL2, WFDC1]	[ACVR1B, ACVRL1, ADIPOR1, ADIPOR2, AGTR2, AGXT, APBB1, APBB2, BCL2, BCL6, BDKRB1, BMP10, BMPR2, BTG1, CAPRIN2, CCDC85B, CDA, CDKN1B, CDKN2A, CDKN2AIP, CDKN2C, CDKN2D, CGRRF1, CRYAB, CYP27B1, DAB2, DCBLD2, DCUN1D3, DNAJB2, DNAJC2, EI24, ENO1, ENPP1, ESR2, FGF13, FRZB, GDF2, GDF9, GNG4, GREM1, HNF4A, HSPA1B, IHPK2, IL7, ING1, INHBA, MUL1, MYL2, NDRG3, NDUFA13, NDUFS3, NME6, NPPA, NPPB, NPR1, NRP1, …	[EI24, ENO1, INHBA, SEMA3F, SMAD3, SPP1, TNK1, TP53, TP63, TP73]	[ACVRL1, APBB1, BCL2, BDKRB1, CRYAB, DAB2, DCUN1D3, ENPP1, FGF13, NPR1, NTN1, OSGIN1, RBBP7, RERG, RRAD, RTN4, SCGB3A1, SFRP2, SLIT2, SLIT3, SOX17, TSPYL2, WFDC1]	30.303	69.697	Specific for Cluster 2
GO:0046545	GO_BiologicalProcess_16.11.2010_17h17	development of primary female sexual characteristics	28	32.9412	0.00012532	0.00126058	[ADAMTS1, ANG, ANGPT1, BCL2, BMP4, C17orf28, CCND2, CCNE1, CHD7, EDN2, EREG, ERMP1, ESR1, FANCA, FGF7, INHBA, KITLG, MMP14, PGR, RBP4, SGPL1, SLIT2, SLIT3, STAT5B, TAF4, TP63, VEGFA, WNT10A]	[ACSBG1, ACVR1B, ADAMTS1, AGXT, AMH, ANG, ANGPT1, BCL2, BCL2L1, BMP15, BMP4, BMPR1B, BRCA2, C17orf28, CAPN5, CCND2, CCNE1, CENPI, CHD7, EDN2, EIF2B2, EIF2B4, EIF2B5, EREG, ERMP1, ESR1, ESR2, FANCA, FANCG, FGF10, FGF7, FOXC1, FOXL2, FOXO3, FSHB, FSHR, FST, IMMP2L, INHA, INHBA, INHBB, KDR, KGFLP1, KGFLP2, KITLG, LEP, LEPROT, LFNG, LHX8, LHX9, MMP14, MMP19, MSH4, NKX2-1, NOBOX, NOS3, NR5A1, NRIP1, P…	[C17orf28, CCNE1, CHD7, EDN2, EREG, ERMP1, FANCA, INHBA, MMP14, SGPL1, TAF4, TP63, VEGFA, WNT10A]	[ADAMTS1, ANG, ANGPT1, BCL2, BMP4, CCND2, ESR1, FGF7, KITLG, PGR, RBP4, SLIT2, SLIT3, STAT5B]	50	50	Common
GO:0045792	GO_BiologicalProcess_16.11.2010_17h17	negative regulation of cell size	34	30.3571	0.000156613	0.00154505	[ACVRL1, APBB1, BCL2, BDKRB1, CRYAB, DAB2, DCUN1D3, EI24, ENO1, ENPP1, FGF13, INHBA, NPR1, NTN1, OSGIN1, RBBP7, RERG, RRAD, RTN4, SCGB3A1, SEMA3F, SFRP2, SLIT2, SLIT3, SMAD3, SOX17, SPP1, TNK1, TP53, TP63, TP73, TSC2, TSPYL2, WFDC1]	[ACVR1B, ACVRL1, ADIPOR1, ADIPOR2, AGTR2, AGXT, AKT1, AKT1S1, APBB1, APBB2, BCL2, BCL6, BDKRB1, BMP10, BMPR2, BTG1, CAPRIN2, CAV3, CCDC85B, CDA, CDKN1B, CDKN2A, CDKN2AIP, CDKN2C, CDKN2D, CGRRF1, CRYAB, CYP27B1, DAB2, DCBLD2, DCUN1D3, DEPDC6, DNAJB2, DNAJC2, EI24, ENO1, ENPP1, ESR2, FGF13, FRAP1, FRZB, GDF2, GDF9, GNG4, GREM1, HNF4A, HSPA1B, IHPK2, IL7, ING1, INHBA, MUL1, MYL2, NDRG3, NDUFA13, NDU…	[EI24, ENO1, INHBA, SEMA3F, SMAD3, SPP1, TNK1, TP53, TP63, TP73]	[ACVRL1, APBB1, BCL2, BDKRB1, CRYAB, DAB2, DCUN1D3, ENPP1, FGF13, NPR1, NTN1, OSGIN1, RBBP7, RERG, RRAD, RTN4, SCGB3A1, SFRP2, SLIT2, SLIT3, SOX17, TSC2, TSPYL2, WFDC1]	29.4118	70.5882	Specific for Cluster 2
GO:0007051	GO_BiologicalProcess_16.11.2010_17h17	spindle organization	17	40.4762	0.000165709	0.00160394	[AURKA, BUB1B, CKS2, ESPL1, FBXO5, KIF11, KIF23, KIF2A, MLH1, NDC80, PRC1, SAC3D1, SPAG5, STMN1, TACC3, TTK, ZWINT]	[AURKA, BUB1B, CEP120, CEP192, CEP63, CEP72, CKAP5, CKS2, DCTN2, DYNC1H1, ESPL1, FBXO5, HDAC3, KIF11, KIF23, KIF2A, METTL11A, MLH1, MYH9, NCOR1, NDC80, OFD1, PCNT, PRC1, RAN, RCC1, SAC3D1, SMC1A, SMC3, SPAG5, SPC25, STMN1, TACC2, TACC3, TNKS, TTK, TUBB1, TUBB2A, TUBG1, UBE2C, UNC84B, ZWINT]	[AURKA, BUB1B, CKS2, ESPL1, FBXO5, KIF11, KIF23, KIF2A, NDC80, PRC1, SAC3D1, SPAG5, STMN1, TACC3, TTK, ZWINT]	[MLH1]	94.1176	5.88235	Specific for Cluster 1
GO:0022602	GO_BiologicalProcess_16.11.2010_17h17	ovulation cycle process	26	33.3333	0.000173672	0.00164988	[ADAMTS1, ANG, ANGPT1, BCL2, BMP4, C17orf28, CCND2, CCNE1, EDN2, ERBB2, EREG, ERMP1, ESR1, FGF7, INHBA, KITLG, MMP14, PGR, SFRP4, SGPL1, SLIT2, SLIT3, STAT5B, TAF4, TGFB3, VEGFA]	[ADAMTS1, ADNP, AGXT, AMH, ANG, ANGPT1, BCL2, BCL2L1, BMP15, BMP4, BMPR1B, C17orf28, CAPN5, CCKBR, CCND2, CCNE1, CENPI, EDN2, EIF2B2, EIF2B4, EIF2B5, ERBB2, EREG, ERMP1, ESR1, ESR2, FANCG, FGF7, FOXC1, FOXL2, FOXO3, FSHB, FSHR, IMMP2L, INHA, INHBA, INHBB, KDR, KGFLP1, KGFLP2, KITLG, LEP, LEPROT, LFNG, MMP14, MMP19, MSH4, MSTN, NKX2-1, NOBOX, NOS3, NPY5R, NR5A1, NRIP1, OXTR, PCYT1B, PDGFRA, PGR, P…	[C17orf28, CCNE1, EDN2, ERBB2, EREG, ERMP1, INHBA, MMP14, SGPL1, TAF4, VEGFA]	[ADAMTS1, ANG, ANGPT1, BCL2, BMP4, CCND2, ESR1, FGF7, KITLG, PGR, SFRP4, SLIT2, SLIT3, STAT5B, TGFB3]	42.3077	57.6923	Common
GO:0032355	GO_BiologicalProcess_16.11.2010_17h17	response to estradiol stimulus	23	34.8485	0.000192	0.00179083	[ALDH1A2, ARNT2, AURKA, BMP4, CCNA2, CCND2, CCNE1, CRYAB, CTGF, DUSP1, ENO2, ESR1, FOXA1, GHR, IHH, IL1B, MAP1B, MSX2, PTCH1, SOCS2, STAT5B, TFF1, WFDC1]	[ALDH1A2, ARNT2, AURKA, BMP4, BMP7, CASP6, CASP8, CCNA2, CCND2, CCNE1, CD38, CRYAB, CTGF, CTNNB1, DHH, DUSP1, ENO2, ESR1, F3, FGF10, FOXA1, GH1, GHR, GPR81, GPX4, IGFBP2, IHH, IL1B, INSR, MAP1B, MAPK15, MSX2, NKX2-5, NOS3, NPY1R, OXT, OXTR, PDGFA, PDGFB, PDGFRA, PRDM2, PRKCA, PTCH1, PTEN, PTGS2, RARA, RNF14, SERPINA1, SFRP1, SHH, SLC25A36, SLC34A2, SLC6A1, SOCS1, SOCS2, SOCS3, STAT3, STAT5B, STRN…	[AURKA, CCNA2, CCNE1, FOXA1, IHH]	[ALDH1A2, ARNT2, BMP4, CCND2, CRYAB, CTGF, DUSP1, ENO2, ESR1, GHR, IL1B, MAP1B, MSX2, PTCH1, SOCS2, STAT5B, TFF1, WFDC1]	21.7391	78.2609	Specific for Cluster 2
GO:0000077	GO_BiologicalProcess_16.11.2010_17h17	DNA damage checkpoint	21	36.2069	0.000195741	0.00179313	[ANTXR1, ATM, BRCC3, CCNA2, CCND1, CDC2, CHEK1, DGKZ, DTL, FAM175A, FOXN3, MSH2, PLK1, RBM38, RFWD3, RINT1, RRAD, TP53, TP63, TP73, ZAK]	[ANTXR1, ARTN, ATM, ATRIP, BLM, BRCA1, BRCC3, BRE, BRIP1, BRSK1, CCNA2, CCND1, CCNG1, CDC14B, CDC2, CEP63, CHEK1, CHEK2, CLSPN, DGKZ, DTL, FAM175A, FBXO31, FBXO6, FOXN3, FOXO4, FZR1, GML, GTSE1, H2AFX, HUS1, MDC1, MIZF, MSH2, NEK11, PAK3, PLK1, PML, PPP2R5C, PTPN11, RAD17, RAD9A, RBM38, RFWD3, RINT1, RPA4, RPS27L, RRAD, TIPIN, TIPRL, TP53, TP63, TP73, TRIAP1, UIMC1, USP28, XPC, ZAK]	[BRCC3, CCNA2, CCND1, CDC2, CHEK1, DGKZ, DTL, MSH2, PLK1, RFWD3, TP53, TP63, TP73]	[ANTXR1, ATM, FAM175A, FOXN3, RBM38, RINT1, RRAD, ZAK]	61.9048	38.0952	Common
GO:0010647	GO_BiologicalProcess_16.11.2010_17h17	positive regulation of cell communication	102	22.7679	0.000211499	0.0019035	[ACVRL1, ADIPOQ, ADRA2A, AKAP12, ANGPT1, ANTXR1, ARRB1, ARRB2, ATM, BMP4, BMP6, C18orf32, CARD11, CCL2, CD36, CDKN2B, ECM1, ECT2, EDA2R, ERBB2, ERBB3, EREG, ESR1, FADD, FAM110A, FGF13, FGF9, FGFBP1, FGFR1, FLNA, FOXA1, FURIN, FZD7, GAS1, GHR, GPR177, GRIK5, HHEX, HRAS, IGF1, IKBKE, IL1B, ILK, ITGA2, ITGA5, ITPKB, JUP, KITLG, KL, KLK6, LMCD1, LPAR2, LPAR3, LTBR, MAD2L1, MAPK8IP2, NCAM1, NMU, NOTCH…	[ABRA, ACVR1B, ACVR2A, ACVR2B, ACVRL1, ADA, ADAM17, ADAMTS20, ADIPOQ, ADORA2A, ADRA1A, ADRA2A, ADRB2, ADRB3, AFAP1L2, AGPAT1, AGPAT2, AGXT, AKAP12, AKAP5, AKT2, ALS2, ANGPT1, ANTXR1, APOL3, AREG, ARNT, ARRB1, ARRB2, ASCL1, ATM, ATP2C1, AXIN1, BAMBI, BCL10, BECN1, BIRC2, BMP10, BMP2, BMP4, BMP6, BMP7, BMPER, BMPR1A, BMPR2, BRAF, BST2, C11orf59, C18orf32, CANT1, CARD11, CARD9, CARTPT, CASP1, CASP10…	[CARD11, ECT2, ERBB2, ERBB3, EREG, FADD, FAM110A, FGFBP1, FOXA1, FURIN, HRAS, IKBKE, ITGA2, JUP, KLK6, LPAR2, LPAR3, LTBR, MAD2L1, MAPK8IP2, NMU, POU5F1, PRKCZ, S100A7, S100A9, SLC1A3, SLC20A1, SLC35B2, SMAD3, SOX2, SOX4, TAC1, TGFA, TLR2, TNFSF10, TP63, TRAF4, TSPAN6, TTK, UBD, VEGFA, ZDHHC13]	[ACVRL1, ADIPOQ, ADRA2A, AKAP12, ANGPT1, ANTXR1, ARRB1, ARRB2, ATM, BMP4, BMP6, C18orf32, CCL2, CD36, CDKN2B, ECM1, EDA2R, ESR1, FGF13, FGF9, FGFR1, FLNA, FZD7, GAS1, GHR, GPR177, GRIK5, HHEX, IGF1, IL1B, ILK, ITGA5, ITPKB, KITLG, KL, LMCD1, NCAM1, NOTCH2, PRKCB, PRRX1, RBPMS, RHEB, RRAGD, S100B, SDCBP, SFRP4, SORBS3, TERF2IP, TGFB1I1, TGFB3, TGFBR1, TGM2, THBS1, TMOD2, TPD52L1, TRAF5, VEGFB, WNT…	41.1765	58.8235	Common
GO:0045859	GO_BiologicalProcess_16.11.2010_17h17	regulation of protein kinase activity	88	23.3422	0.000235361	0.00208173	[ADCY5, ADORA2B, ADRA2A, ANG, ANGPT1, BDKRB1, BMP4, C5, CAMKK2, CASP3, CBLC, CCND1, CCND2, CCNE2, CD24, CDC25C, CDC6, CDK5R1, CDK7, CDKN2B, CDKN3, CENPE, CERK, CHEK1, CKS1B, CKS2, DGKA, DGKB, DGKZ, DUSP16, DUSP3, DUSP8, DUSP9, EDN2, EDNRA, ERBB2, EREG, FGF13, GADD45B, GADD45G, GHR, GNAQ, HSPA5, IL1B, ILK, IRAK1, ITGA1, KAT2B, KITLG, LATS2, LPAR2, LPAR3, LRRK2, MAP3K5, MAP3K6, MDFI, MS4A1, NPM1, P…	[ACVR2B, ADAM17, ADAM9, ADCY1, ADCY2, ADCY4, ADCY5, ADCY6, ADCY7, ADCY8, ADNP, ADORA1, ADORA2A, ADORA2B, ADRA2A, ADRA2B, ADRA2C, ADRB2, AGK, AIDA, AKT1, AKT1S1, ALS2, ANAPC2, ANG, ANGPT1, ANKRD54, APC, APOE, APP, AXIN1, AZU1, BCCIP, BDKRB1, BIRC7, BLM, BMP4, BMP7, C13orf15, C1QTNF2, C5, C5AR1, CALCA, CAMKK2, CARD10, CARD14, CARTPT, CASP3, CAV1, CAV3, CBLC, CCDC88A, CCK, CCND1, CCND2, CCND3, CCNE2…	[ADORA2B, CASP3, CBLC, CCND1, CCNE2, CD24, CDC25C, CDC6, CDK5R1, CDK7, CDKN3, CENPE, CHEK1, CKS1B, CKS2, DGKA, DGKZ, DUSP9, EDN2, ERBB2, EREG, HSPA5, IRAK1, LPAR2, LPAR3, MAP3K5, MDFI, NPM1, PKIA, PKIB, PKMYT1, PRKCZ, S100A9, SFN, SPHK2, SPRY4, TARBP2, TGFA, TP73, TPX2, TRAF4, TRIB3]	[ADCY5, ADRA2A, ANG, ANGPT1, BDKRB1, BMP4, C5, CAMKK2, CCND2, CDKN2B, CERK, DGKB, DUSP16, DUSP3, DUSP8, EDNRA, FGF13, GADD45B, GADD45G, GHR, GNAQ, IL1B, ILK, ITGA1, KAT2B, KITLG, LATS2, LRRK2, MAP3K6, MS4A1, PKIG, PKN1, PRKACB, PRKAG2, PRKAR2B, SERTAD1, SFRP2, TGFB3, TGFBR1, THBS1, TPD52L1, TSC2, TSPYL2, VLDLR, ZAK, ZEB2]	47.7273	52.2727	Common
GO:0008406	GO_BiologicalProcess_16.11.2010_17h17	gonad development	38	28.5714	0.000267606	0.00214503	[ADAMTS1, ANG, ANGPT1, BCL2, BCL2L11, BIK, BMP4, C17orf28, CCND1, CCND2, CCNE1, EDN2, EREG, ERMP1, ESR1, FANCA, FGF7, FGF9, GATA6, INHBA, JAG2, KITLG, MGST1, MMP14, MSH2, PATZ1, PGR, RBP4, SDC1, SGPL1, SLIT2, SLIT3, STAT5B, TAF4, TFAP2C, VEGFA, WNT10A, WNT2B]	[ACSBG1, ACVR2A, ADAMTS1, AGXT, AMH, ANG, ANGPT1, ANKRD7, AREG, BCL2, BCL2L1, BCL2L11, BIK, BMP15, BMP4, BMPR1B, BRCA2, C17orf28, CAPN5, CCND1, CCND2, CCNE1, CENPI, CHGA, CSDA, CSDE1, DHH, DMRT1, DMRT2, EDN2, EIF2B2, EIF2B4, EIF2B5, EREG, ERMP1, ESR1, ESR2, FANCA, FANCG, FGF7, FGF8, FGF9, FNDC3A, FOXC1, FOXL2, FOXO3, FSHB, FSHR, FST, GATA4, GATA6, HMGB2, HMGCR, HSD17B10, IMMP2L, INHA, INHBA, INHB…	[BCL2L11, BIK, C17orf28, CCND1, CCNE1, EDN2, EREG, ERMP1, FANCA, INHBA, JAG2, MGST1, MMP14, MSH2, PATZ1, SDC1, SGPL1, TAF4, TFAP2C, VEGFA, WNT10A]	[ADAMTS1, ANG, ANGPT1, BCL2, BMP4, CCND2, ESR1, FGF7, FGF9, GATA6, KITLG, PGR, RBP4, SLIT2, SLIT3, STAT5B, WNT2B]	55.2632	44.7368	Common
GO:0008284	GO_BiologicalProcess_16.11.2010_17h17	positive regulation of cell proliferation	105	22.5322	0.00025934	0.00214583	[ADORA2B, ADRA2A, ALDH1A2, ALOX12, ANG, AQP1, ARNT2, ATF3, BCL2, BMP4, BNC1, CAPN1, CARD11, CCL11, CCL2, CCNA2, CCNB1, CCND1, CCND2, CD24, CDC2, CDC20, CDC7, CLEC11A, CSF3, CTF1, CTGF, CXCL10, DDR2, ECM1, EDN2, EIF5A2, ERBB2, EREG, ESR1, FGF13, FGF7, FGF9, FGFBP1, FGFR1, FIGF, FOXP1, FZD7, GAS1, GLI2, HDAC4, HIG2, HOXC10, HRAS, IGF1, IHH, IL1B, ILK, ITGA2, JUN, KITLG, KLF5, KRT6A, LAMC1, MAB21L2,…	[ADA, ADAM10, ADAM17, ADK, ADM, ADORA2B, ADRA1D, ADRA2A, ADRB2, AGER, AGGF1, AGXT, AKIRIN2, ALDH1A2, ALOX12, ANG, AQP1, ARHGAP5, ARNT, ARNT2, ARTN, ASAH3L, ASH2L, ATF3, AVP, AVPR1A, B4GALT1, BAMBI, BCL2, BCL2L1, BCL6, BIRC6, BLM, BLOC1S2, BMI1, BMP10, BMP2, BMP4, BMPR1A, BMPR2, BNC1, BTC, C21orf33, CALCRL, CALR, CAMP, CAPN1, CAPNS1, CARD11, CCK, CCKBR, CCL11, CCL14, CCL2, CCL24, CCL26, CCNA2, CCN…	[ADORA2B, ALOX12, BNC1, CAPN1, CARD11, CCNA2, CCNB1, CCND1, CD24, CDC2, CDC20, CDC7, CSF3, CXCL10, EDN2, ERBB2, EREG, FGFBP1, HIG2, HOXC10, HRAS, IHH, ITGA2, KLF5, KRT6A, MAB21L2, MARCKSL1, MCTS1, MST1R, NACC1, NME1, NPM1, PRAME, PRKCZ, PTHLH, RAB25, RECQL4, ROMO1, RPS15A, RTKN2, S100A9, SOX2, SOX4, STAT1, TAC1, TBC1D8, TGFA, TP63, TTK, VASH2, VAV3, VEGFA, WDR77, WWTR1]	[ADRA2A, ALDH1A2, ANG, AQP1, ARNT2, ATF3, BCL2, BMP4, CCL11, CCL2, CCND2, CLEC11A, CTF1, CTGF, DDR2, ECM1, EIF5A2, ESR1, FGF13, FGF7, FGF9, FGFR1, FIGF, FOXP1, FZD7, GAS1, GLI2, HDAC4, IGF1, IL1B, ILK, JUN, KITLG, LAMC1, NCKAP1L, NTN1, OSR2, PBX1, PDGFRB, PRRX1, PTN, RBPJ, S1PR3, SERTAD1, SFRP2, ST8SIA1, STAT5B, TGFBR1, TGM2, THBS4, VEGFB]	51.4286	48.5714	Common
GO:0022008	GO_BiologicalProcess_16.11.2010_17h17	neurogenesis	141	21.4612	0.000266849	0.00217291	[AGRN, ALDH1A2, APBB1, ASCL2, ASPM, ATL1, BBS4, BCL11B, BCL2, BDNF, BMP4, BMP6, BTG2, CCDC64, CCND2, CDC20, CDH1, CDK5R1, CELSR2, CNOT6, CTF1, DAPK3, DCDC2, DCLK1, DFNA5, DPYSL2, DSCAML1, EFNA5, EGR2, EPHA4, EPHA7, ERBB2, ERBB3, ETV4, EYA1, FEZ1, FGF13, FGFR1, FOXA1, FOXA2, FREQ, FYN, FZD1, FZD4, FZD7, GAS1, GAS7, GFRA3, GLI2, GNAO1, GNAQ, GPC2, GPR98, GSN, HOXC10, ID3, IGF1, IGSF9, IHH, ILK, IRX…	[ABI2, ABT1, ACSL4, ACSL6, ACTB, ACTR3, ADCY1, ADM, ADNP, ADNP2, ADORA2A, ADRA2B, ADRA2C, AFG3L2, AGER, AGRN, AGXT, AKAP5, AKT1, ALCAM, ALDH1A2, ALKBH1, ALMS1, ALS2, AMIGO1, ANAPC2, APBB1, APC, APOE, APP, ARHGDIA, ARHGEF1, ARHGEF7, ARTN, ARX, ASCL1, ASCL2, ASPM, ATF1, ATF5, ATL1, ATN1, ATOH1, ATP2B2, ATP7A, ATXN10, AXIN1, AZU1, B3GNT2, BAI1, BAIAP2, BARHL1, BARHL2, BBS4, BCL11B, BCL2, BDNF, BMP2,…	[AGRN, ASCL2, ASPM, BCL11B, CCDC64, CDC20, CDH1, CDK5R1, CELSR2, CNOT6, DCDC2, DFNA5, EFNA5, EPHA4, ERBB2, ERBB3, ETV4, FOXA1, FOXA2, GPC2, GPR98, HOXC10, IGSF9, IHH, IRX5, ISL2, ITGA3, JAG2, LMNB2, MMP14, MNX1, NR2F6, ONECUT2, P2RY2, PAX7, PLXNB1, POU3F1, PTPRR, PTPRZ1, PVRL1, RACGAP1, S1PR5, SEMA3F, SIPA1L1, SIX1, SIX4, SLC1A3, SLITRK6, SOX2, SPP1, TACC3, TH, TP53, TP73, VEGFA, XRCC5, ZNF488]	[ALDH1A2, APBB1, ATL1, BBS4, BCL2, BDNF, BMP4, BMP6, BTG2, CCND2, CTF1, DAPK3, DCLK1, DPYSL2, DSCAML1, EGR2, EPHA7, EYA1, FEZ1, FGF13, FGFR1, FREQ, FYN, FZD1, FZD4, FZD7, GAS1, GAS7, GFRA3, GLI2, GNAO1, GNAQ, GSN, ID3, IGF1, ILK, ITGA1, LAMC1, LDB2, LGI4, LPPR4, MAP1B, MAPT, MEF2C, NAB1, NAB2, NDN, NLGN1, NNAT, NOTCH4, NR2F1, NRP2, NRTN, NRXN1, NTF3, NTN1, NTRK3, PBX1, PIP5K1C, PLP1, PRDM6, PRTFD…	40.4255	59.5745	Common
GO:0030879	GO_BiologicalProcess_16.11.2010_17h17	mammary gland development	27	32.1429	0.000259187	0.00217972	[APLN, ATP7B, BCAT2, BCL2L11, BMP4, CCL11, CCND1, CDO1, COASY, ERBB2, ERBB3, ESR1, FGF13, GLI2, IGF1, IRF6, ITGA2, KIF2A, NOTCH4, NTN1, PGR, PTCH1, SLIT2, STAT5B, TGFB3, VEGFA, XDH]	[AGPAT6, APLN, AREG, ATP7B, B4GALT1, BCAT2, BCL2L11, BMP4, BRCA2, BSX, BTRC, CAV1, CCL11, CCND1, CDO1, CEBPB, CHUK, COASY, CREB1, CSF1, EGF, EIF2AK3, ELF3, ELF5, ERBB2, ERBB3, ERBB4, ESR1, FGF10, FGF13, GHRHR, GLI2, GLI3, HOXA5, HOXB9, HOXD9, ID2, IGF1, IGF1R, IRF6, IRS1, IRS2, ITGA2, KIF2A, LEF1, MBD4, NCOA3, NEURL, NOTCH4, NRG1, NRG3, NTN1, OXTR, PGR, PHB2, PMCH, PML, PRL, PRLR, PTCH1, ROBO1, S…	[APLN, ATP7B, BCAT2, BCL2L11, CCND1, COASY, ERBB2, ERBB3, IRF6, ITGA2, KIF2A, VEGFA, XDH]	[BMP4, CCL11, CDO1, ESR1, FGF13, GLI2, IGF1, NOTCH4, NTN1, PGR, PTCH1, SLIT2, STAT5B, TGFB3]	48.1481	51.8519	Common
GO:0035468	GO_BiologicalProcess_16.11.2010_17h17	positive regulation of signaling pathway	95	22.9469	0.000257933	0.00220533	[ACVRL1, ADIPOQ, ADRA2A, AKAP12, ANGPT1, ANTXR1, ARRB1, ARRB2, ATM, BMP4, BMP6, C18orf32, CARD11, CD36, CDKN2B, ECM1, ECT2, EDA2R, ERBB2, ERBB3, EREG, ESR1, FADD, FAM110A, FGF13, FGF9, FGFBP1, FGFR1, FLNA, FOXA1, FURIN, FZD7, GAS1, GHR, GPR177, HHEX, HRAS, IGF1, IKBKE, IL1B, ILK, ITGA5, ITPKB, JUP, KITLG, KL, KLK6, LMCD1, LPAR2, LPAR3, LTBR, MAD2L1, MAPK8IP2, NCAM1, NOTCH2, POU5F1, PRKCB, PRRX1, …	[ABRA, ACVR1B, ACVR2A, ACVR2B, ACVRL1, ADA, ADAM17, ADIPOQ, ADRA1A, ADRA2A, ADRB2, ADRB3, AFAP1L2, AGPAT1, AGPAT2, AGXT, AKAP12, AKAP5, ALS2, ANGPT1, ANTXR1, APOL3, AREG, ARNT, ARRB1, ARRB2, ASCL1, ATM, ATP2C1, AXIN1, BAMBI, BCL10, BIRC2, BMP10, BMP2, BMP4, BMP6, BMP7, BMPER, BMPR1A, BMPR2, BRAF, BST2, C11orf59, C18orf32, CANT1, CARD11, CARD9, CASP1, CASP10, CASP8, CAT, CAV1, CAV2, CC2D1A, CD226,…	[CARD11, ECT2, ERBB2, ERBB3, EREG, FADD, FAM110A, FGFBP1, FOXA1, FURIN, HRAS, IKBKE, JUP, KLK6, LPAR2, LPAR3, LTBR, MAD2L1, MAPK8IP2, POU5F1, S100A7, S100A9, SLC20A1, SLC35B2, SMAD3, SOX2, SOX4, TGFA, TLR2, TNFSF10, TP63, TRAF4, TSPAN6, TTK, UBD, VEGFA, ZDHHC13]	[ACVRL1, ADIPOQ, ADRA2A, AKAP12, ANGPT1, ANTXR1, ARRB1, ARRB2, ATM, BMP4, BMP6, C18orf32, CD36, CDKN2B, ECM1, EDA2R, ESR1, FGF13, FGF9, FGFR1, FLNA, FZD7, GAS1, GHR, GPR177, HHEX, IGF1, IL1B, ILK, ITGA5, ITPKB, KITLG, KL, LMCD1, NCAM1, NOTCH2, PRKCB, PRRX1, RBPMS, RHEB, RRAGD, S100B, SDCBP, SFRP4, SORBS3, TERF2IP, TGFB1I1, TGFB3, TGFBR1, TGM2, THBS1, TMOD2, TPD52L1, TRAF5, VEGFB, WNT2B, ZDHHC17, …	38.9474	61.0526	Common
GO:0048704	GO_BiologicalProcess_16.11.2010_17h17	embryonic skeletal system morphogenesis	22	34.9206	0.000253926	0.00220786	[BMP4, DSCAML1, EYA1, GAS1, HOXB3, HOXB4, HOXB5, HOXB6, HOXB7, HOXB8, MDFI, OSR2, PRRX1, SIX1, SIX2, SIX4, SMAD3, TBX1, TFAP2A, TGFB3, TGFBR1, ZEB1]	[ALX1, ALX3, ALX4, AXIN1, BMP4, BMP7, CHST11, COL2A1, DSCAML1, EYA1, FOXC2, GAS1, GFPT1, GLI3, GNAS, GSC, HOXA2, HOXA3, HOXA4, HOXA5, HOXA6, HOXA7, HOXB1, HOXB2, HOXB3, HOXB4, HOXB5, HOXB6, HOXB7, HOXB8, HOXD10, HOXD3, HOXD4, HOXD9, KIAA0319, MDFI, MEN1, MYF5, NDST1, NIPBL, NODAL, NOG, OSR2, PCGF2, PRRX1, PRRX2, RDH10, SATB2, SIX1, SIX2, SIX4, SMAD2, SMAD3, TBX1, TBX15, TFAP2A, TGFB3, TGFBR1, TGF…	[HOXB3, HOXB4, HOXB5, HOXB6, HOXB7, HOXB8, MDFI, SIX1, SIX2, SIX4, SMAD3, TBX1, TFAP2A]	[BMP4, DSCAML1, EYA1, GAS1, OSR2, PRRX1, TGFB3, TGFBR1, ZEB1]	59.0909	40.9091	Common
GO:0048706	GO_BiologicalProcess_16.11.2010_17h17	embryonic skeletal system development	27	31.7647	0.000321505	0.00253741	[BMP4, DSCAML1, EYA1, FGF9, GAS1, HOXB3, HOXB4, HOXB5, HOXB6, HOXB7, HOXB8, KIAA1217, MDFI, OSR2, PAX7, PBX1, PRRX1, RBP4, SIX1, SIX2, SIX4, SMAD3, TBX1, TFAP2A, TGFB3, TGFBR1, ZEB1]	[ACVR2A, ALX1, ALX3, ALX4, AXIN1, BMP4, BMP7, CHST11, COL1A1, COL2A1, DEAF1, DLK1, DLX1, DSCAML1, EYA1, FGF9, FOXC2, GAS1, GFPT1, GLI3, GNAS, GSC, HOXA2, HOXA3, HOXA4, HOXA5, HOXA6, HOXA7, HOXB1, HOXB2, HOXB3, HOXB4, HOXB5, HOXB6, HOXB7, HOXB8, HOXB9, HOXC5, HOXC6, HOXD1, HOXD10, HOXD3, HOXD4, HOXD9, KIAA0319, KIAA1217, MDFI, MEN1, MYF5, NDST1, NIPBL, NKX3-2, NODAL, NOG, OSR2, PAX7, PBX1, PCGF2, …	[HOXB3, HOXB4, HOXB5, HOXB6, HOXB7, HOXB8, KIAA1217, MDFI, PAX7, SIX1, SIX2, SIX4, SMAD3, TBX1, TFAP2A]	[BMP4, DSCAML1, EYA1, FGF9, GAS1, OSR2, PBX1, PRRX1, RBP4, TGFB3, TGFBR1, ZEB1]	55.5556	44.4444	Common
GO:0046660	GO_BiologicalProcess_16.11.2010_17h17	female sex differentiation	28	31.1111	0.000369198	0.00286968	[ADAMTS1, ANG, ANGPT1, BCL2, BMP4, C17orf28, CCND2, CCNE1, CHD7, EDN2, EREG, ERMP1, ESR1, FANCA, FGF7, INHBA, KITLG, MMP14, PGR, RBP4, SGPL1, SLIT2, SLIT3, STAT5B, TAF4, TP63, VEGFA, WNT10A]	[ACSBG1, ACVR1B, ADAMTS1, AGXT, AMH, ANG, ANGPT1, BCL2, BCL2L1, BMP15, BMP4, BMPR1B, BRCA2, C17orf28, CAPN5, CCND2, CCNE1, CENPI, CHD7, EDN2, EIF2B2, EIF2B4, EIF2B5, EREG, ERMP1, ESR1, ESR2, FANCA, FANCG, FGF10, FGF7, FOXC1, FOXL2, FOXO3, FSHB, FSHR, FST, IMMP2L, INHA, INHBA, INHBB, KDR, KGFLP1, KGFLP2, KITLG, LEP, LEPROT, LFNG, LHX8, LHX9, MBD4, MMP14, MMP19, MSH4, NCOA3, NKX2-1, NOBOX, NOS3, NR…	[C17orf28, CCNE1, CHD7, EDN2, EREG, ERMP1, FANCA, INHBA, MMP14, SGPL1, TAF4, TP63, VEGFA, WNT10A]	[ADAMTS1, ANG, ANGPT1, BCL2, BMP4, CCND2, ESR1, FGF7, KITLG, PGR, RBP4, SLIT2, SLIT3, STAT5B]	50	50	Common
GO:0043549	GO_BiologicalProcess_16.11.2010_17h17	regulation of kinase activity	90	22.9008	0.000397342	0.00304233	[ADCY5, ADORA2B, ADRA2A, ANG, ANGPT1, BDKRB1, BMP4, C5, CAMKK2, CASP3, CBLC, CCND1, CCND2, CCNE2, CD24, CDC25C, CDC6, CDK5R1, CDK7, CDKN2B, CDKN3, CENPE, CERK, CHEK1, CKS1B, CKS2, DGKA, DGKB, DGKZ, DUSP16, DUSP3, DUSP8, DUSP9, EDN2, EDNRA, ERBB2, EREG, FGF13, GADD45B, GADD45G, GHR, GNAQ, HSPA5, IL1B, ILK, IRAK1, ITGA1, KAT2B, KITLG, LATS2, LPAR2, LPAR3, LRRK2, MAP3K5, MAP3K6, MDFI, MS4A1, NPM1, P…	[ACVR2B, ADAM17, ADAM9, ADCY1, ADCY2, ADCY4, ADCY5, ADCY6, ADCY7, ADCY8, ADNP, ADORA1, ADORA2A, ADORA2B, ADRA2A, ADRA2B, ADRA2C, ADRB2, AGK, AIDA, AKT1, AKT1S1, ALS2, ANAPC2, ANG, ANGPT1, ANKRD54, APC, APOE, APP, ARTN, AXIN1, AZU1, BCCIP, BDKRB1, BIRC7, BLM, BMP4, BMP7, C13orf15, C1QTNF2, C5, C5AR1, CALCA, CAMKK2, CARD10, CARD14, CARTPT, CASP3, CAV1, CAV3, CBLC, CCDC88A, CCK, CCND1, CCND2, CCND3,…	[ADORA2B, CASP3, CBLC, CCND1, CCNE2, CD24, CDC25C, CDC6, CDK5R1, CDK7, CDKN3, CENPE, CHEK1, CKS1B, CKS2, DGKA, DGKZ, DUSP9, EDN2, ERBB2, EREG, HSPA5, IRAK1, LPAR2, LPAR3, MAP3K5, MDFI, NPM1, PKIA, PKIB, PKMYT1, PRKCZ, S100A9, SFN, SPHK2, SPRY4, TARBP2, TGFA, TP73, TPX2, TRAF4, TRIB3, VAV2, VAV3]	[ADCY5, ADRA2A, ANG, ANGPT1, BDKRB1, BMP4, C5, CAMKK2, CCND2, CDKN2B, CERK, DGKB, DUSP16, DUSP3, DUSP8, EDNRA, FGF13, GADD45B, GADD45G, GHR, GNAQ, IL1B, ILK, ITGA1, KAT2B, KITLG, LATS2, LRRK2, MAP3K6, MS4A1, PKIG, PKN1, PRKACB, PRKAG2, PRKAR2B, SERTAD1, SFRP2, TGFB3, TGFBR1, THBS1, TPD52L1, TSC2, TSPYL2, VLDLR, ZAK, ZEB2]	48.8889	51.1111	Common
GO:0061138	GO_BiologicalProcess_16.11.2010_17h17	morphogenesis of a branching epithelium	33	29.2035	0.00042784	0.00322768	[ACVR1, BCL2, BMP4, CCL11, CTSH, EDNRA, ESR1, EYA1, FGF13, FGF7, FGFR1, FOXA1, FOXA2, GLI2, HHEX, HOXA11, HOXA13, IGF1, IHH, ILK, NOTCH4, PBX1, PGR, SFRP2, SIX1, SOX2, SPINT1, SRF, TCF21, TGM2, TIMELESS, TP63, VEGFA]	[ACVR1, ADM, AGXT, AREG, BCL2, BMP2, BMP4, BMP7, BTRC, CCL11, CD44, CITED1, CSF1, CTNNB1, CTNNBIP1, CTSH, CTSZ, DAG1, EDN1, EDNRA, ENG, ESR1, EYA1, FEM1B, FGF10, FGF13, FGF7, FGFR1, FLT1, FOXA1, FOXA2, FOXC2, FOXD1, FOXD2, FOXD3, FOXD4, FOXD4L1, FOXD4L3, FOXD4L4, FOXD4L5, FOXD4L6, FOXS1, FRS2, GBX2, GCM1, GLI2, GLI3, GNA13, GPC3, GRB2, GZF1, HHEX, HOXA11, HOXA13, HOXA5, HOXB13, HOXD11, HOXD13, IG…	[CTSH, FOXA1, FOXA2, IHH, SIX1, SOX2, SPINT1, TIMELESS, TP63, VEGFA]	[ACVR1, BCL2, BMP4, CCL11, EDNRA, ESR1, EYA1, FGF13, FGF7, FGFR1, GLI2, HHEX, HOXA11, HOXA13, IGF1, ILK, NOTCH4, PBX1, PGR, SFRP2, SRF, TCF21, TGM2]	30.303	69.697	Specific for Cluster 2
GO:0008585	GO_BiologicalProcess_16.11.2010_17h17	female gonad development	25	32.0513	0.000453201	0.00322906	[ADAMTS1, ANG, ANGPT1, BCL2, BMP4, C17orf28, CCND2, CCNE1, EDN2, EREG, ERMP1, ESR1, FANCA, FGF7, INHBA, KITLG, MMP14, PGR, SGPL1, SLIT2, SLIT3, STAT5B, TAF4, VEGFA, WNT10A]	[ACSBG1, ADAMTS1, AGXT, AMH, ANG, ANGPT1, BCL2, BCL2L1, BMP15, BMP4, BMPR1B, BRCA2, C17orf28, CAPN5, CCND2, CCNE1, CENPI, EDN2, EIF2B2, EIF2B4, EIF2B5, EREG, ERMP1, ESR1, ESR2, FANCA, FANCG, FGF7, FOXC1, FOXL2, FOXO3, FSHB, FSHR, FST, IMMP2L, INHA, INHBA, INHBB, KDR, KGFLP1, KGFLP2, KITLG, LEP, LEPROT, LFNG, LHX8, LHX9, MMP14, MMP19, MSH4, NOBOX, NOS3, NR5A1, NRIP1, PCYT1B, PDGFRA, PGR, PLA2G4A, …	[C17orf28, CCNE1, EDN2, EREG, ERMP1, FANCA, INHBA, MMP14, SGPL1, TAF4, VEGFA, WNT10A]	[ADAMTS1, ANG, ANGPT1, BCL2, BMP4, CCND2, ESR1, FGF7, KITLG, PGR, SLIT2, SLIT3, STAT5B]	48	52	Common
GO:0032103	GO_BiologicalProcess_16.11.2010_17h17	positive regulation of response to external stimulus	28	30.7692	0.000451349	0.00326116	[ADORA2B, AGTR1, CNOT6, CREB3L4, CXCL10, CXCL12, EDN2, EDNRA, FIGF, IL16, IL1B, INDO, ITGA2, NCKAP1L, NTRK3, PDE5A, PTGER3, S100A7, SLIT2, SMAD3, STAT5B, TAC1, TGM2, THBS1, THBS4, TLR2, VEGFA, VEGFB]	[ADAM10, ADAM17, ADORA2B, AGER, AGTR1, AGXT, AKT2, AZU1, BECN1, C3, C3AR1, C5AR1, CCL5, CD47, CDH13, CNOT6, CNTF, CREB3L4, CX3CL1, CXCL10, CXCL12, CYP27B1, DSCAM, EDN2, EDN3, EDNRA, F2RL1, F3, F7, FABP4, FCER1A, FGF10, FIGF, GHRL, GHSR, IL16, IL1B, IL33, IL6, IL6R, IL6ST, IL8, INDO, ITGA2, JAK2, KDR, LBP, LTA, NCKAP1L, NDEL1, NLRP12, NPY, NPY5R, NTRK3, OPRM1, OSM, OSMR, PCDHA4, PDE5A, PDGFB, PLA2…	[ADORA2B, CNOT6, CREB3L4, CXCL10, EDN2, INDO, ITGA2, S100A7, SMAD3, TAC1, TLR2, VEGFA]	[AGTR1, CXCL12, EDNRA, FIGF, IL16, IL1B, NCKAP1L, NTRK3, PDE5A, PTGER3, SLIT2, STAT5B, TGM2, THBS1, THBS4, VEGFB]	42.8571	57.1429	Common
GO:0050801	GO_BiologicalProcess_16.11.2010_17h17	ion homeostasis	93	22.6829	0.000450879	0.0033043	[ADIPOQ, AGTR1, ATP1A2, ATP7B, ATXN1, BAK1, BCL2, BDKRB1, BDKRB2, BNIP3, C7, CACNA1C, CCL11, CCL2, CCRL1, CD24, CKB, CLDN1, CLDN11, CNOT6, CP, CUTC, CXCL12, CXCL13, DMPK, EDN2, EDNRA, EGR2, ENPP1, EPHX2, ERBB2, FOXA2, FXYD1, GLRB, GNA15, GNAQ, GRIK5, IL1B, ILK, ITPR1, ITPR3, JPH2, JUN, KCNA5, KCNH2, KCNK3, KCNMB4, KLK6, LCN2, LGI4, LPAR2, LPAR3, MFI2, NAB1, NAB2, NLGN3, NPR1, NTF3, P2RX1, P2RY2, …	[ABCB5, ABCB6, ABCB7, ACSBG1, ADIPOQ, ADM, ADORA1, ADORA2A, ADRA1A, AFG3L2, AGTR1, AGXT, AIFM3, ALAS2, AMELX, AMIGO1, ANXA7, APOE, APP, AQP11, ASNA1, ATOX1, ATP1A2, ATP1A4, ATP2A1, ATP2A2, ATP2C1, ATP4A, ATP5B, ATP6V0A4, ATP6V0E1, ATP6V0E2, ATP6V1B1, ATP6V1H, ATP7A, ATP7B, ATXN1, AVP, AVPR1A, AVPR1B, BAK1, BAX, BCL2, BCL2L1, BDH2, BDKRB1, BDKRB2, BEST2, BNIP3, C11orf9, C3AR1, C5AR1, C7, CACNA1A, …	[ATP7B, BAK1, CD24, CLDN1, CNOT6, CP, CXCL13, EDN2, ERBB2, FOXA2, GNA15, ITPR3, KLK6, LCN2, LPAR2, LPAR3, MFI2, P2RY2, POU3F1, PRKCZ, RHCG, SAA1, SCO2, SLC39A4, SLC4A11, SLC9A1, SLC9A2, SLC9A3R1, TAC1, TFRC, TRIM24, TRPV4]	[ADIPOQ, AGTR1, ATP1A2, ATXN1, BCL2, BDKRB1, BDKRB2, BNIP3, C7, CACNA1C, CCL11, CCL2, CCRL1, CKB, CLDN11, CUTC, CXCL12, DMPK, EDNRA, EGR2, ENPP1, EPHX2, FXYD1, GLRB, GNAQ, GRIK5, IL1B, ILK, ITPR1, JPH2, JUN, KCNA5, KCNH2, KCNK3, KCNMB4, LGI4, NAB1, NAB2, NLGN3, NPR1, NTF3, P2RX1, PGM5, PKD2, PLN, PLP1, PYGM, RGN, RIC3, RYR2, RYR3, S1PR3, SCARA5, SFRP4, SLC22A17, SLC24A3, SLC8A1, SLC9A9, SYPL2, TG…	34.4086	65.5914	Common
GO:0016202	GO_BiologicalProcess_16.11.2010_17h17	regulation of striated muscle tissue development	19	35.8491	0.000450117	0.00334653	[ACVR1, AGRN, BCL2, BMP4, BOC, CCNB1, CDC2, CENPF, FGF13, FGF9, FGFR1, HDAC4, IGFBP3, ILK, RBP4, SMAD3, TBX5, THRA, TWIST1]	[ACVR1, ADRB2, AGRN, BCL2, BMP10, BMP4, BOC, BTG1, CCNB1, CDC2, CENPF, CSDA, CXADR, FGF13, FGF9, FGFR1, GATA4, GJA1, HDAC1, HDAC3, HDAC4, HDAC5, HDAC9, HEY2, IGFBP3, ILK, ITGB1BP3, LEF1, LUC7L, MBNL3, MKL2, MSTN, MTPN, NEU2, NKX2-5, NOG, NOTCH1, NRG1, RBP4, RPS6KB1, SHH, SIRT2, SMAD3, SOX8, SOX9, TBX3, TBX5, TGFB1, THRA, TWIST1, WNT10B, WNT2, ZFHX3]	[AGRN, CCNB1, CDC2, CENPF, IGFBP3, SMAD3]	[ACVR1, BCL2, BMP4, BOC, FGF13, FGF9, FGFR1, HDAC4, ILK, RBP4, TBX5, THRA, TWIST1]	31.5789	68.4211	Specific for Cluster 2
GO:0030036	GO_BiologicalProcess_16.11.2010_17h17	actin cytoskeleton organization	59	24.7899	0.000497308	0.00344755	[ABL1, ACTC1, ADRA2A, ANG, ANTXR1, AQP1, ARRB1, BCL2, CALD1, CAPZA1, CDC42, CDC42BPG, CDC42EP2, CNN1, CNN2, CXCL1, DAAM2, DIAPH2, DIAPH3, DSTN, EHD2, ELMO1, EPB41L2, ESPN, FERMT2, FGF7, FHDC1, FHL3, FLNA, FOXJ1, FSCN1, GAS7, GSN, KRT19, MRAS, MYH11, NCKAP1L, OBSL1, PARVA, PDLIM3, PDLIM7, PLEK2, PRKCZ, PRSS8, RACGAP1, RHOJ, RND1, ROCK2, SDCBP, SHROOM2, SIPA1L1, SORBS1, SRF, TMOD1, TNNT2, TPM1, VAS…	[ABI1, ABI2, ABL1, ACTA1, ACTC1, ACTN4, ADD1, ADD2, ADRA2A, AIF1, ALDOA, AMOT, ANG, ANTXR1, AQP1, AQP2, ARAP1, ARF6, ARFIP2, ARHGAP17, ARHGAP26, ARHGAP6, ARHGDIB, ARHGEF11, ARHGEF17, ARHGEF18, ARHGEF2, ARPC1A, ARPC4, ARPC5, ARRB1, ATP2C1, BCAR1, BCL2, BCL6, BIN3, BMP10, CALD1, CALR, CAPN10, CAPZA1, CAPZA2, CAPZA3, CAPZB, CCKAR, CDC42, CDC42BPA, CDC42BPB, CDC42BPG, CDC42EP2, CDK5, CNN1, CNN2, CNN3…	[CAPZA1, CDC42, CDC42BPG, CNN2, CXCL1, DIAPH3, ESPN, FHDC1, FOXJ1, FSCN1, KRT19, PLEK2, PRKCZ, PRSS8, RACGAP1, SHROOM2, SIPA1L1]	[ABL1, ACTC1, ADRA2A, ANG, ANTXR1, AQP1, ARRB1, BCL2, CALD1, CDC42EP2, CNN1, DAAM2, DIAPH2, DSTN, EHD2, ELMO1, EPB41L2, FERMT2, FGF7, FHL3, FLNA, GAS7, GSN, MRAS, MYH11, NCKAP1L, OBSL1, PARVA, PDLIM3, PDLIM7, RHOJ, RND1, ROCK2, SDCBP, SORBS1, SRF, TMOD1, TNNT2, TPM1, VASP, WASF2, WASF3]	28.8136	71.1864	Specific for Cluster 2
GO:0006873	GO_BiologicalProcess_16.11.2010_17h17	cellular ion homeostasis	86	22.9333	0.000504466	0.00345054	[ADIPOQ, AGTR1, ATP1A2, ATP7B, ATXN1, BAK1, BCL2, BDKRB1, BDKRB2, BNIP3, C7, CACNA1C, CCL11, CCL2, CCRL1, CD24, CKB, CLDN1, CLDN11, CNOT6, CP, CXCL12, CXCL13, DMPK, EDN2, EDNRA, EGR2, ENPP1, EPHX2, ERBB2, FOXA2, FXYD1, GLRB, GNA15, GNAQ, GRIK5, IL1B, ILK, ITPR1, ITPR3, JPH2, JUN, KCNA5, KCNH2, KCNK3, KCNMB4, KLK6, LCN2, LGI4, LPAR2, LPAR3, MFI2, NAB1, NAB2, NLGN3, NTF3, P2RX1, P2RY2, PGM5, PKD2, …	[ABCB5, ABCB6, ABCB7, ACSBG1, ADIPOQ, ADM, ADORA1, ADORA2A, ADRA1A, AFG3L2, AGTR1, AGXT, AIFM3, ALAS2, AMIGO1, ANXA7, APOE, APP, AQP11, ASNA1, ATOX1, ATP1A2, ATP1A4, ATP2A1, ATP2A2, ATP2C1, ATP5B, ATP6V0E1, ATP6V0E2, ATP6V1H, ATP7A, ATP7B, ATXN1, AVP, AVPR1A, AVPR1B, BAK1, BAX, BCL2, BCL2L1, BDKRB1, BDKRB2, BEST2, BNIP3, C11orf9, C3AR1, C5AR1, C7, CACNA1A, CACNA1C, CACNA1F, CACNA1G, CACNB4, CACNG…	[ATP7B, BAK1, CD24, CLDN1, CNOT6, CP, CXCL13, EDN2, ERBB2, FOXA2, GNA15, ITPR3, KLK6, LCN2, LPAR2, LPAR3, MFI2, P2RY2, POU3F1, PRKCZ, RHCG, SAA1, SCO2, SLC39A4, SLC4A11, SLC9A3R1, TAC1, TFRC, TRPV4]	[ADIPOQ, AGTR1, ATP1A2, ATXN1, BCL2, BDKRB1, BDKRB2, BNIP3, C7, CACNA1C, CCL11, CCL2, CCRL1, CKB, CLDN11, CXCL12, DMPK, EDNRA, EGR2, ENPP1, EPHX2, FXYD1, GLRB, GNAQ, GRIK5, IL1B, ILK, ITPR1, JPH2, JUN, KCNA5, KCNH2, KCNK3, KCNMB4, LGI4, NAB1, NAB2, NLGN3, NTF3, P2RX1, PGM5, PKD2, PLN, PLP1, PYGM, RGN, RIC3, RYR2, RYR3, S1PR3, SCARA5, SLC22A17, SLC24A3, SLC8A1, SYPL2, TGM2, TRPC1]	33.7209	66.2791	Specific for Cluster 2
GO:0055082	GO_BiologicalProcess_16.11.2010_17h17	cellular chemical homeostasis	87	22.8947	0.000496907	0.00349197	[ADIPOQ, AGTR1, ATP1A2, ATP7B, ATXN1, BAK1, BCL2, BDKRB1, BDKRB2, BNIP3, C7, CACNA1C, CCL11, CCL2, CCRL1, CD24, CKB, CLDN1, CLDN11, CNOT6, CP, CXCL12, CXCL13, DMPK, EDN2, EDNRA, EGR2, ENPP1, EPHX2, ERBB2, FOXA2, FXYD1, GLRB, GNA15, GNAQ, GRIK5, IL1B, ILK, ITPR1, ITPR3, JPH2, JUN, KCNA5, KCNH2, KCNK3, KCNMB4, KLK6, LCN2, LGI4, LPAR2, LPAR3, MFI2, NAB1, NAB2, NLGN3, NTF3, P2RX1, P2RY2, PGM5, PKD2, …	[ABCB5, ABCB6, ABCB7, ACSBG1, ADIPOQ, ADM, ADORA1, ADORA2A, ADRA1A, AFG3L2, AGTR1, AGXT, AIFM3, ALAS2, AMIGO1, ANXA7, APOE, APP, AQP11, ASNA1, ATOX1, ATP1A2, ATP1A4, ATP2A1, ATP2A2, ATP2C1, ATP5B, ATP6V0E1, ATP6V0E2, ATP6V1H, ATP7A, ATP7B, ATXN1, AVP, AVPR1A, AVPR1B, BAK1, BAX, BCL2, BCL2L1, BDKRB1, BDKRB2, BEST2, BNIP3, C11orf9, C3AR1, C5AR1, C7, CACNA1A, CACNA1C, CACNA1F, CACNA1G, CACNB4, CACNG…	[ATP7B, BAK1, CD24, CLDN1, CNOT6, CP, CXCL13, EDN2, ERBB2, FOXA2, GNA15, ITPR3, KLK6, LCN2, LPAR2, LPAR3, MFI2, P2RY2, POU3F1, PRKCZ, RHCG, SAA1, SCO2, SLC39A4, SLC4A11, SLC9A3R1, TAC1, TFRC, TRPV4]	[ADIPOQ, AGTR1, ATP1A2, ATXN1, BCL2, BDKRB1, BDKRB2, BNIP3, C7, CACNA1C, CCL11, CCL2, CCRL1, CKB, CLDN11, CXCL12, DMPK, EDNRA, EGR2, ENPP1, EPHX2, FXYD1, GLRB, GNAQ, GRIK5, IL1B, ILK, ITPR1, JPH2, JUN, KCNA5, KCNH2, KCNK3, KCNMB4, LGI4, NAB1, NAB2, NLGN3, NTF3, P2RX1, PGM5, PKD2, PLN, PLP1, PPARGC1A, PYGM, RGN, RIC3, RYR2, RYR3, S1PR3, SCARA5, SLC22A17, SLC24A3, SLC8A1, SYPL2, TGM2, TRPC1]	33.3333	66.6667	Specific for Cluster 2
GO:0010810	GO_BiologicalProcess_16.11.2010_17h17	regulation of cell-substrate adhesion	19	35.1852	0.000589328	0.00387597	[ACVRL1, ANGPT2, BCL2, C4orf31, CCDC80, CD36, CYR61, ECM2, EMILIN1, EPB41L5, FZD4, FZD7, ILK, MMP14, ONECUT2, PRKCZ, SMAD3, THBS1, TSC2]	[ACVRL1, ANGPT2, ARHGAP6, ASAH3L, BCL2, BCL6, C4orf31, CCDC80, CD36, CDH13, CDK6, CDKN2A, COL1A1, CSF1, CYR61, DMTF1, ECM2, EDIL3, EGFLAM, EMID2, EMILIN1, EPB41L5, FZD4, FZD7, GSK3B, HOXA7, HSD17B12, ILK, KDR, LGALS1, MMP14, MYF5, NF1, NF2, NOTCH1, ONECUT1, ONECUT2, PIK3CB, PLEKHA2, PLG, PRKCZ, PTEN, RELL2, SDC4, SFRP1, SMAD3, SYNGAP1, TDGF3, THBS1, TSC1, TSC2, UTRN, VTN, WNT1]	[ANGPT2, MMP14, ONECUT2, PRKCZ, SMAD3]	[ACVRL1, BCL2, C4orf31, CCDC80, CD36, CYR61, ECM2, EMILIN1, EPB41L5, FZD4, FZD7, ILK, THBS1, TSC2]	26.3158	73.6842	Specific for Cluster 2
GO:0048634	GO_BiologicalProcess_16.11.2010_17h17	regulation of muscle organ development	19	35.1852	0.000589328	0.00387597	[ACVR1, AGRN, BCL2, BMP4, BOC, CCNB1, CDC2, CENPF, FGF13, FGF9, FGFR1, HDAC4, IGFBP3, ILK, RBP4, SMAD3, TBX5, THRA, TWIST1]	[ACVR1, ADRB2, AGRN, BCL2, BMP10, BMP4, BOC, BTG1, CCNB1, CDC2, CENPF, CSDA, CXADR, FGF13, FGF9, FGFR1, GATA4, GJA1, HDAC1, HDAC3, HDAC4, HDAC5, HDAC9, HEY2, IGFBP3, ILK, ITGB1BP3, LEF1, LUC7L, MBNL3, MKL2, MSTN, MTPN, NEU2, NGFR, NKX2-5, NOG, NOTCH1, NRG1, RBP4, RPS6KB1, SHH, SIRT2, SMAD3, SOX8, SOX9, TBX3, TBX5, TGFB1, THRA, TWIST1, WNT10B, WNT2, ZFHX3]	[AGRN, CCNB1, CDC2, CENPF, IGFBP3, SMAD3]	[ACVR1, BCL2, BMP4, BOC, FGF13, FGF9, FGFR1, HDAC4, ILK, RBP4, TBX5, THRA, TWIST1]	31.5789	68.4211	Specific for Cluster 2
GO:0007584	GO_BiologicalProcess_16.11.2010_17h17	response to nutrient	45	26.3158	0.000582084	0.00387804	[A2M, ADIPOQ, ALDH1A2, ANGPT1, AQP1, BCHE, BCL2, BMP4, CCL2, CCND1, CCNE1, CDKN2B, CTSH, CXCL10, CYP24A1, DDIT3, DUSP1, FZD4, FZD7, GATM, GSN, HMGCS2, HSD17B2, IL1B, ITGA2, KRT13, KYNU, LIPG, MAP1B, MEST, MGP, MUC1, PTCH1, RBP4, RYR2, SERPINF1, SLC6A19, SLC8A1, SOX2, SPP1, SSTR1, STAT1, TFRC, TIMP3, VLDLR]	[A2M, AACS, ABCG5, ACSL3, ACSL4, ACSL5, ACSL6, ADIPOQ, ADIPOR2, ADNP2, ALDH1A2, ALOX5, ALPL, ANGPT1, AQP1, AQP3, ARSA, ARSB, ASAH3L, ASCL1, ASS1, BCHE, BCKDHB, BCL2, BGLAP, BMP2, BMP4, BMP7, BRCA2, BTF3L1, CAV1, CCKAR, CCL2, CCND1, CCNE1, CD38, CD44, CDKN2B, CDKN2D, CEBPA, CHMP1A, COL1A1, COX4I1, CTSH, CUBN, CXCL10, CYP11A1, CYP1A1, CYP24A1, CYP27B1, DAD1, DDIT3, DUSP1, ENSA, EP300, EPX, F7, FADS…	[CCND1, CCNE1, CTSH, CXCL10, CYP24A1, HMGCS2, HSD17B2, ITGA2, KRT13, KYNU, LIPG, MEST, MUC1, SLC6A19, SOX2, SPP1, STAT1, TFRC]	[A2M, ADIPOQ, ALDH1A2, ANGPT1, AQP1, BCHE, BCL2, BMP4, CCL2, CDKN2B, DDIT3, DUSP1, FZD4, FZD7, GATM, GSN, IL1B, MAP1B, MGP, PTCH1, RBP4, RYR2, SERPINF1, SLC8A1, SSTR1, TIMP3, VLDLR]	40	60	Common
GO:0007088	GO_BiologicalProcess_16.11.2010_17h17	regulation of mitosis	20	34.4828	0.000575958	0.00388772	[ANAPC10, ATM, BMP4, BUB1, C13orf34, CDC25C, CENPE, CENPF, EREG, ESPL1, HOXA13, IGF1, IL1B, NEK2, NUSAP1, PKMYT1, PRMT5, TGFA, TTK, UBD]	[ANAPC10, APC, ATM, AURKAIP1, BMP4, BMP7, BTC, BUB1, C13orf34, CAV2, CD28, CDC16, CDC23, CDC25C, CENPE, CENPF, CUL7, DLGAP5, DRD3, EDN1, EDN3, EGF, EPGN, EREG, ESPL1, HECTD3, HERC2, HOXA13, IGF1, IGF2, IL1A, IL1B, INS, INSR, KIF20B, L3MBTL, LRP5, MAD2L2, MYCBP2, NEK2, NEK6, NME6, NUSAP1, PEBP1, PHIP, PIN1, PKMYT1, PRMT5, PSMG2, RCC1, TERF1, TGFA, TNF, TPR, TTK, UBD, USP44, ZZEF1]	[ANAPC10, BUB1, C13orf34, CDC25C, CENPE, CENPF, EREG, ESPL1, NEK2, NUSAP1, PKMYT1, PRMT5, TGFA, TTK, UBD]	[ATM, BMP4, HOXA13, IGF1, IL1B]	75	25	Specific for Cluster 1
GO:0050920	GO_BiologicalProcess_16.11.2010_17h17	regulation of chemotaxis	20	34.4828	0.000575958	0.00388772	[ANGPT2, C5, CNOT6, CREB3L4, CXCL10, CXCL12, EDN2, FIGF, IL16, ITGA2, NCKAP1L, S100A7, SEMA3F, SLIT2, SLIT3, SMAD3, THBS1, THBS4, VEGFA, VEGFB]	[ADAM10, ADAM17, AGER, AKT2, ANGPT2, AZU1, C3AR1, C5, C5AR1, CDH13, CNOT6, CREB3L4, CXCL10, CXCL12, CXCR4, DSCAM, EDN2, EDN3, F2RL1, F3, F7, FGF10, FIGF, GREM1, IL16, IL6, IL6R, IL8, ITGA2, KDR, KIF20B, LBP, NCKAP1L, NOD2, NRP1, PDGFB, PLXNA3, PRKCA, ROBO1, ROBO2, RYK, S100A11P, S100A7, SCG2, SEMA3A, SEMA3F, SERPINE1, SLIT2, SLIT3, SMAD3, TGFB1, THBS1, THBS4, USP14, VEGFA, VEGFB, VEGFC, WNT5A]	[ANGPT2, CNOT6, CREB3L4, CXCL10, EDN2, ITGA2, S100A7, SEMA3F, SMAD3, VEGFA]	[C5, CXCL12, FIGF, IL16, NCKAP1L, SLIT2, SLIT3, THBS1, THBS4, VEGFB]	50	50	Common
GO:0051783	GO_BiologicalProcess_16.11.2010_17h17	regulation of nuclear division	20	34.4828	0.000575958	0.00388772	[ANAPC10, ATM, BMP4, BUB1, C13orf34, CDC25C, CENPE, CENPF, EREG, ESPL1, HOXA13, IGF1, IL1B, NEK2, NUSAP1, PKMYT1, PRMT5, TGFA, TTK, UBD]	[ANAPC10, APC, ATM, AURKAIP1, BMP4, BMP7, BTC, BUB1, C13orf34, CAV2, CD28, CDC16, CDC23, CDC25C, CENPE, CENPF, CUL7, DLGAP5, DRD3, EDN1, EDN3, EGF, EPGN, EREG, ESPL1, HECTD3, HERC2, HOXA13, IGF1, IGF2, IL1A, IL1B, INS, INSR, KIF20B, L3MBTL, LRP5, MAD2L2, MYCBP2, NEK2, NEK6, NME6, NUSAP1, PEBP1, PHIP, PIN1, PKMYT1, PRMT5, PSMG2, RCC1, TERF1, TGFA, TNF, TPR, TTK, UBD, USP44, ZZEF1]	[ANAPC10, BUB1, C13orf34, CDC25C, CENPE, CENPF, EREG, ESPL1, NEK2, NUSAP1, PKMYT1, PRMT5, TGFA, TTK, UBD]	[ATM, BMP4, HOXA13, IGF1, IL1B]	75	25	Specific for Cluster 1
GO:0033273	GO_BiologicalProcess_16.11.2010_17h17	response to vitamin	31	29.2453	0.000612901	0.00397998	[ALDH1A2, ANGPT1, AQP1, BCHE, BCL2, BMP4, CCL2, CCND1, CCNE1, CTSH, CXCL10, CYP24A1, DUSP1, FZD4, FZD7, GSN, HSD17B2, IL1B, ITGA2, KRT13, KYNU, MAP1B, MEST, MUC1, PTCH1, RBP4, SERPINF1, SOX2, SPP1, TFRC, TIMP3]	[ADNP2, ALDH1A2, ALPL, ANGPT1, AQP1, AQP3, ASAH3L, ASCL1, BCHE, BCL2, BGLAP, BMP2, BMP4, BMP7, CCL2, CCND1, CCNE1, CD38, CD44, CDKN2D, CEBPA, COL1A1, CTSH, CXCL10, CYP1A1, CYP24A1, CYP27B1, DUSP1, EP300, EPX, F7, FADS1, FZD10, FZD4, FZD7, GDAP1, GGCX, GSN, HLCS, HSD17B2, IGF1R, IGF2R, IGFBP2, IGFBP7, IL1A, IL1B, INSR, ITGA2, KRT13, KYNU, LRP5L, LTC4S, MAP1B, MEST, MICB, MLL5, MUC1, OVCA2, OXT, PD…	[CCND1, CCNE1, CTSH, CXCL10, CYP24A1, HSD17B2, ITGA2, KRT13, KYNU, MEST, MUC1, SOX2, SPP1, TFRC]	[ALDH1A2, ANGPT1, AQP1, BCHE, BCL2, BMP4, CCL2, DUSP1, FZD4, FZD7, GSN, IL1B, MAP1B, PTCH1, RBP4, SERPINF1, TIMP3]	45.1613	54.8387	Common
GO:0048754	GO_BiologicalProcess_16.11.2010_17h17	branching morphogenesis of a tube	30	29.4118	0.000671276	0.00430455	[ACVR1, BCL2, BMP4, CCL11, CTSH, EDNRA, ESR1, EYA1, FGF13, FOXA1, FOXA2, GLI2, HHEX, HOXA11, IGF1, IHH, ILK, MGP, MMP14, NOTCH4, PBX1, PGR, SFRP2, SIX1, SLIT2, SOX2, SRF, TCF21, TIMELESS, VEGFA]	[ACVR1, AGXT, AREG, B4GALT1, BCL2, BMP2, BMP4, BMP7, BTRC, CCL11, CD44, CITED1, CSF1, CTNNB1, CTNNBIP1, CTSH, CTSZ, DAG1, DICER1, EDN1, EDNRA, EGF, ENG, ESR1, EYA1, FGF10, FGF13, FLT1, FOXA1, FOXA2, FOXC2, FOXD1, FOXD2, FOXD3, FOXD4, FOXD4L1, FOXD4L3, FOXD4L4, FOXD4L5, FOXD4L6, FOXS1, GBX2, GDF7, GLI2, GLI3, GNA13, GPC3, GZF1, HHEX, HOXA11, HOXA5, HOXD11, IGF1, IHH, ILK, KDR, LAMA1, LAMA5, MBD4, …	[CTSH, FOXA1, FOXA2, IHH, MMP14, SIX1, SOX2, TIMELESS, VEGFA]	[ACVR1, BCL2, BMP4, CCL11, EDNRA, ESR1, EYA1, FGF13, GLI2, HHEX, HOXA11, IGF1, ILK, MGP, NOTCH4, PBX1, PGR, SFRP2, SLIT2, SRF, TCF21]	30	70	Specific for Cluster 2
GO:0051291	GO_BiologicalProcess_16.11.2010_17h17	protein heterooligomerization	20	33.8983	0.000739209	0.00468166	[BIRC3, COL1A2, FADD, GLRB, HRAS, ILK, ITPR3, JUP, KCNH2, NLGN1, P2RX1, PARVA, PCBD1, PDSS1, PRKAA2, PRKCZ, RRM1, RRM2, TSC2, UQCRH]	[ALDOC, BCL10, BIRC2, BIRC3, BRAF, CASP8, CDH2, CNTF, COL1A1, COL1A2, CTNNB1, FADD, GABRA6, GCHFR, GLRB, GRB2, HR, HRAS, IDE, IGF1R, ILK, INSR, IRS1, ITPR3, JUP, KCND2, KCNH2, KCNH6, KCNH7, MAP2K1, NLGN1, P2RX1, P2RX6, PARVA, PCBD1, PCBD2, PDSS1, PDSS2, PPP5C, PRKAA2, PRKAB1, PRKAG1, PRKAR2A, PRKCZ, RRM1, RRM2, SCUBE3, SEPT11, SEPT7, SEPT9, SKI, SKIL, STXBP3, TNFRSF1A, TSC1, TSC2, UQCRH, VHL, YWH…	[BIRC3, FADD, HRAS, ITPR3, JUP, PCBD1, PDSS1, PRKCZ, RRM1, RRM2, UQCRH]	[COL1A2, GLRB, ILK, KCNH2, NLGN1, P2RX1, PARVA, PRKAA2, TSC2]	55	45	Common
GO:0048568	GO_BiologicalProcess_16.11.2010_17h17	embryonic organ development	55	24.7748	0.000768858	0.00481005	[ALDH1A2, ASCL2, BMP4, CHD7, CYR61, DDIT3, DSCAML1, EYA1, FGF9, FGFR1, FOXF2, GAS1, GJB5, GJB6, GLI2, HAND1, HHEX, HOXB3, HOXB4, HOXB5, HOXB6, HOXB7, HOXB8, ID3, IHH, KRT19, MDFI, NR4A3, NSDHL, OSR2, PBX1, PKD2, PLK4, PRRX1, RBP4, RORA, SH2B3, SIX1, SIX2, SIX4, SMAD3, SNAI1, SOBP, SOX2, SPINT1, TBX1, TCF21, TFAP2A, TFEB, TGFB3, TGFBR1, TH, THRA, VEGFA, ZEB1]	[ADA, ADM, AKT1, ALDH1A2, ALDH1A3, ALX1, ALX3, ALX4, ARNT, ASCL2, ATOH1, AXIN1, BIRC6, BMP4, BMP7, BMPR1A, BPTF, CDX2, CDX4, CEBPA, CEBPB, CEP290, CHD7, CHRNA10, CHRNA9, CHST11, CITED1, CLIC5, COL2A1, CRYAA, CYR61, DDIT3, DLX5, DLX6, DNAJB6, DSCAML1, EDN1, EFNA1, EGFR, EGLN1, EOMES, EPAS1, EPHA2, ESX1, EYA1, FBXW8, FGF10, FGF9, FGFR1, FOXC2, FOXD3, FOXE1, FOXE3, FOXF2, FOXG1, FOXI1, FOXI2, FOXI3,…	[ASCL2, CHD7, GJB5, GJB6, HOXB3, HOXB4, HOXB5, HOXB6, HOXB7, HOXB8, IHH, KRT19, MDFI, NSDHL, PLK4, SIX1, SIX2, SIX4, SMAD3, SOX2, SPINT1, TBX1, TFAP2A, TH, VEGFA]	[ALDH1A2, BMP4, CYR61, DDIT3, DSCAML1, EYA1, FGF9, FGFR1, FOXF2, GAS1, GLI2, HAND1, HHEX, ID3, NR4A3, OSR2, PBX1, PKD2, PRRX1, RBP4, RORA, SH2B3, SNAI1, SOBP, TCF21, TFEB, TGFB3, TGFBR1, THRA, ZEB1]	45.4545	54.5455	Common
GO:0060548	GO_BiologicalProcess_16.11.2010_17h17	negative regulation of cell death	88	22.5064	0.000820596	0.00507188	[ACVR1, ALOX12, AMIGO2, ANGPT1, AQP1, ARNT2, ATM, BAG3, BCL11B, BCL2, BCL2A1, BCL2L2, BDKRB2, BDNF, BIRC3, BIRC5, BMP4, BNIP3, BTG2, CASP3, CCL2, CDC2, CFDP1, CIDEA, CRYAB, DDAH2, DHCR24, ERBB2, ERBB3, ESR1, EYA1, FAIM2, FAIM3, FGF13, FGFR1, FOXA1, FURIN, GRIK5, GSTP1, HELLS, HSPA5, HTATIP2, IER3, IGF1, IHH, IL1B, ILK, INDO, IRAK1, KITLG, MAD2L1, MEF2C, MITF, MSH2, MSX2, NCKAP1L, NOTCH2, NPM1, PA…	[AATF, ACVR1, ADA, ADAM17, ADAMTS20, ADNP, ADNP2, ADORA1, ADORA2A, AGXT, AIPL1, AKT1, AKT1S1, AKT2, ALB, ALOX12, AMIGO2, ANGPT1, ANGPT4, ANGPTL4, ANXA1, ANXA4, ANXA5, APC, API5, APOE, APOH, AQP1, ARHGDIA, ARNT2, ASCL1, ASNS, ATF5, ATG5, ATM, AVEN, AZU1, BAG1, BAG3, BAG4, BARD1, BARHL1, BAX, BCL10, BCL11B, BCL2, BCL2A1, BCL2L1, BCL2L10, BCL2L2, BCL3, BCL6, BDKRB2, BDNF, BECN1, BFAR, BIRC3, BIRC5, …	[ALOX12, AMIGO2, BCL11B, BCL2A1, BIRC3, BIRC5, CASP3, CDC2, DHCR24, ERBB2, ERBB3, FAIM3, FOXA1, FURIN, GSTP1, HELLS, HSPA5, HTATIP2, IHH, INDO, IRAK1, MAD2L1, MSH2, NPM1, PAX7, PRAME, PRKCZ, S100A9, SERPINB2, SIX1, SIX4, SMAD3, SOX4, SPHK2, TNFRSF18, TP53, TP63, TP73, TWIST2, VEGFA, XRCC5, YWHAZ]	[ACVR1, ANGPT1, AQP1, ARNT2, ATM, BAG3, BCL2, BCL2L2, BDKRB2, BDNF, BMP4, BNIP3, BTG2, CCL2, CFDP1, CIDEA, CRYAB, DDAH2, ESR1, EYA1, FAIM2, FGF13, FGFR1, GRIK5, IER3, IGF1, IL1B, ILK, KITLG, MEF2C, MITF, MSX2, NCKAP1L, NOTCH2, PEA15, RBPJ, SLC25A4, SOCS2, SQSTM1, STAT5B, TGFB3, TGFBR1, THBS1, TNFAIP3, TSC22D3, VEGFB]	47.7273	52.2727	Common
GO:0043066	GO_BiologicalProcess_16.11.2010_17h17	negative regulation of apoptosis	86	22.5722	0.000850886	0.00519648	[ACVR1, ALOX12, AMIGO2, ANGPT1, AQP1, ARNT2, ATM, BAG3, BCL11B, BCL2, BCL2A1, BCL2L2, BDKRB2, BDNF, BIRC3, BIRC5, BMP4, BNIP3, BTG2, CASP3, CCL2, CDC2, CFDP1, CIDEA, CRYAB, DDAH2, DHCR24, ERBB2, ERBB3, ESR1, EYA1, FAIM2, FAIM3, FGFR1, FOXA1, FURIN, GRIK5, GSTP1, HELLS, HSPA5, HTATIP2, IER3, IGF1, IHH, IL1B, ILK, INDO, IRAK1, KITLG, MAD2L1, MEF2C, MITF, MSH2, MSX2, NCKAP1L, NOTCH2, NPM1, PAX7, PEA…	[AATF, ACVR1, ADA, ADAM17, ADAMTS20, ADNP, ADORA1, ADORA2A, AGXT, AIPL1, AKT1, AKT1S1, AKT2, ALB, ALOX12, AMIGO2, ANGPT1, ANGPT4, ANGPTL4, ANXA1, ANXA4, ANXA5, APC, API5, APOE, APOH, AQP1, ARHGDIA, ARNT2, ASCL1, ASNS, ATF5, ATG5, ATM, AVEN, AZU1, BAG1, BAG3, BAG4, BARD1, BARHL1, BAX, BCL10, BCL11B, BCL2, BCL2A1, BCL2L1, BCL2L10, BCL2L2, BCL3, BCL6, BDKRB2, BDNF, BECN1, BFAR, BIRC3, BIRC5, BIRC6, …	[ALOX12, AMIGO2, BCL11B, BCL2A1, BIRC3, BIRC5, CASP3, CDC2, DHCR24, ERBB2, ERBB3, FAIM3, FOXA1, FURIN, GSTP1, HELLS, HSPA5, HTATIP2, IHH, INDO, IRAK1, MAD2L1, MSH2, NPM1, PAX7, PRAME, PRKCZ, S100A9, SERPINB2, SIX1, SIX4, SMAD3, SOX4, SPHK2, TNFRSF18, TP53, TP63, TP73, TWIST2, VEGFA, XRCC5, YWHAZ]	[ACVR1, ANGPT1, AQP1, ARNT2, ATM, BAG3, BCL2, BCL2L2, BDKRB2, BDNF, BMP4, BNIP3, BTG2, CCL2, CFDP1, CIDEA, CRYAB, DDAH2, ESR1, EYA1, FAIM2, FGFR1, GRIK5, IER3, IGF1, IL1B, ILK, KITLG, MEF2C, MITF, MSX2, NCKAP1L, NOTCH2, PEA15, RBPJ, SOCS2, SQSTM1, STAT5B, TGFB3, TGFBR1, THBS1, TNFAIP3, TSC22D3, VEGFB]	48.8372	51.1628	Common
GO:0003007	GO_BiologicalProcess_16.11.2010_17h17	heart morphogenesis	29	29.2929	0.000878963	0.0053048	[ACTC1, ADAMTS1, ALDH1A2, BBS4, CHD7, CPE, FHL2, FOXJ1, GATA6, HAND1, HAND2, LY6E, MSX2, PTCH1, RBP4, SFRP2, SMAD3, SMAD7, SMARCD3, SOX17, SOX18, SRF, TBX5, TGFBR3, TH, TNNT2, TPM1, VANGL2, VEGFA]	[ACTC1, ADAMTS1, ALDH1A2, BAZ1B, BBS4, BBS5, BBS7, BMP10, BMP2, BMPR1A, C2CD3, CHD7, COL2A1, COL4A3BP, COL5A1, CPE, DLEC1, EGLN1, ENG, FGFRL1, FHL2, FKBP1A, FOXC1, FOXC2, FOXH1, FOXJ1, GAA, GATA4, GATA6, GJA1, GSK3B, HAND1, HAND2, HTR2B, IFT52, IFT88, INSR, LBX1, LRP6, LY6E, MAP3K7IP1, MESP1, MIB1, MKKS, MKL2, MSX1, MSX2, MYBPC3, MYH6, MYH7, MYL2, MYL3, MYLK2, NIPBL, NKX2-5, NODAL, NPY1R, NPY2R, …	[CHD7, FOXJ1, LY6E, SMAD3, TH, VANGL2, VEGFA]	[ACTC1, ADAMTS1, ALDH1A2, BBS4, CPE, FHL2, GATA6, HAND1, HAND2, MSX2, PTCH1, RBP4, SFRP2, SMAD7, SMARCD3, SOX17, SOX18, SRF, TBX5, TGFBR3, TNNT2, TPM1]	24.1379	75.8621	Specific for Cluster 2
GO:0006461	GO_BiologicalProcess_16.11.2010_17h17	protein complex assembly	109	21.67	0.000901652	0.00537846	[ADIPOQ, ADRM1, AGRN, AHCTF1, ANG, ANGPT1, ANLN, APITD1, ATL1, ATL3, BIRC3, C1QTNF1, C1QTNF7, CAPG, CAPZA1, CBR4, CCNB1, CD2AP, CDC2, CDH1, CDK7, CENPA, CENPE, CENPF, CHAF1A, COASY, COL1A2, COLEC12, CRYAB, CUTC, FADD, FANCA, FBXO5, FLNA, GAS7, GLRB, GMNN, GPX3, GRIK5, GSN, GTF2H3, HMGA1, HRAS, IL1RAP, ILK, IRAK1, ITPR3, JUP, KCNA5, KCNH2, KNTC1, KPNA3, LAMC1, LNX1, MAPK8IP2, MAZ, MED24, MGP, MLH1…	[AASS, ACTN2, ADIPOQ, ADRB2, ADRM1, ADSL, AGRN, AHCTF1, AKR1C1, ALAD, ALDH5A1, ALDOB, ALDOC, ALOX5AP, AMFR, ANG, ANGPT1, ANGPTL4, ANLN, ANXA5, AP2S1, APBA1, APC, APCS, APITD1, AQP11, ARHGAP6, ARL2, ARPC4, ATF1, ATG16L1, ATL1, ATL2, ATL3, ATPAF1, ATPAF2, ATPIF1, AXIN1, BAX, BCL10, BCS1L, BIRC2, BIRC3, BLM, BRAF, BRF2, C10orf2, C1QTNF1, C1QTNF2, C1QTNF7, C20orf7, C2orf56, C9orf24, CACNA1A, CALR, CA…	[ADRM1, AGRN, ANLN, APITD1, ATL3, BIRC3, CAPG, CAPZA1, CBR4, CCNB1, CD2AP, CDC2, CDH1, CDK7, CENPA, CENPE, CENPF, CHAF1A, COASY, FADD, FANCA, FBXO5, GMNN, GTF2H3, HMGA1, HRAS, IL1RAP, IRAK1, ITPR3, JUP, KNTC1, LNX1, MAPK8IP2, MAZ, MED24, MUC20, NACC1, NPM1, OCLN, PCBD1, PDSS1, PFDN6, PFKL, PPIH, PRKCZ, REPS2, RRM1, RRM2, S100A9, SCO2, SLC9A3R1, SMAD3, TAF10, TAF4, TAPBP, TK1, TMEM48, TP53, TP63, …	[ADIPOQ, AHCTF1, ANG, ANGPT1, ATL1, C1QTNF1, C1QTNF7, COL1A2, COLEC12, CRYAB, CUTC, FLNA, GAS7, GLRB, GPX3, GRIK5, GSN, ILK, KCNA5, KCNH2, KPNA3, LAMC1, MGP, MLH1, MYH11, NCKAP1L, NLGN1, OLFM1, P2RX1, PARVA, PEX14, PPARGC1A, PRKAA2, PTRF, SCARA5, SRR, STOM, TGM2, TSC2, TSPAN4, TUBA1A, UPK1A, WASF3]	60.5505	39.4495	Common
GO:0048699	GO_BiologicalProcess_16.11.2010_17h17	generation of neurons	129	21.1129	0.000943789	0.0055651	[AGRN, ALDH1A2, APBB1, ASCL2, ASPM, ATL1, BBS4, BCL11B, BCL2, BDNF, BMP4, BMP6, BTG2, CCDC64, CCND2, CDC20, CDH1, CDK5R1, CELSR2, CNOT6, CTF1, DAPK3, DCDC2, DCLK1, DFNA5, DPYSL2, DSCAML1, EFNA5, EGR2, EPHA4, EPHA7, ERBB2, ERBB3, ETV4, EYA1, FEZ1, FGFR1, FOXA1, FOXA2, FREQ, FYN, FZD1, FZD4, FZD7, GAS1, GAS7, GFRA3, GLI2, GNAO1, GNAQ, GPC2, GPR98, HOXC10, ID3, IGSF9, IHH, ILK, IRX5, ISL2, ITGA1, IT…	[ABI2, ABT1, ACSL4, ACSL6, ACTB, ACTR3, ADCY1, ADM, ADNP, ADNP2, ADORA2A, ADRA2B, ADRA2C, AFG3L2, AGER, AGRN, AKAP5, AKT1, ALCAM, ALDH1A2, ALKBH1, ALMS1, ALS2, AMIGO1, ANAPC2, APBB1, APC, APOE, APP, ARHGDIA, ARHGEF1, ARTN, ARX, ASCL1, ASCL2, ASPM, ATF1, ATF5, ATL1, ATN1, ATOH1, ATP2B2, ATP7A, ATXN10, AXIN1, B3GNT2, BAI1, BAIAP2, BARHL1, BARHL2, BBS4, BCL11B, BCL2, BDNF, BMP2, BMP4, BMP6, BMP7, BM…	[AGRN, ASCL2, ASPM, BCL11B, CCDC64, CDC20, CDH1, CDK5R1, CELSR2, CNOT6, DCDC2, DFNA5, EFNA5, EPHA4, ERBB2, ERBB3, ETV4, FOXA1, FOXA2, GPC2, GPR98, HOXC10, IGSF9, IHH, IRX5, ISL2, ITGA3, JAG2, LMNB2, MNX1, NR2F6, ONECUT2, P2RY2, PAX7, PLXNB1, PTPRR, PTPRZ1, PVRL1, RACGAP1, S1PR5, SEMA3F, SIPA1L1, SIX1, SIX4, SLC1A3, SLITRK6, SOX2, SPP1, TH, TP53, TP73, VEGFA, XRCC5, ZNF488]	[ALDH1A2, APBB1, ATL1, BBS4, BCL2, BDNF, BMP4, BMP6, BTG2, CCND2, CTF1, DAPK3, DCLK1, DPYSL2, DSCAML1, EGR2, EPHA7, EYA1, FEZ1, FGFR1, FREQ, FYN, FZD1, FZD4, FZD7, GAS1, GAS7, GFRA3, GLI2, GNAO1, GNAQ, ID3, ILK, ITGA1, LAMC1, LDB2, LGI4, LPPR4, MAP1B, MAPT, MEF2C, NDN, NLGN1, NNAT, NOTCH4, NR2F1, NRP2, NRTN, NRXN1, NTF3, NTN1, NTRK3, PBX1, PIP5K1C, PRTFDC1, RBPJ, RND1, ROBO3, RORA, RTN4, S100B, S…	41.8605	58.1395	Common
GO:0030326	GO_BiologicalProcess_16.11.2010_17h17	embryonic limb morphogenesis	27	29.6703	0.00105289	0.00613785	[ALDH1A2, BMP4, CHD7, CRABP2, FGF9, FGFR1, GAS1, GLI2, GNA12, GNAQ, HOXA10, HOXA11, HOXA13, HOXC10, MBNL1, MSX2, NOTCH2, PBX1, PRRX1, PTCH1, RAB23, SFRP2, TBX5, TP63, TWIST1, ZBTB16, ZNF358]	[ACD, ALDH1A2, ALX1, ALX3, ALX4, BMP4, BMP7, BMPR1A, C2CD3, CHD7, CHST11, CRABP2, CTNNB1, CYP26B1, DICER1, DKK1, DLX5, DLX6, ECE1, EN1, FBN2, FBXW4, FGF4, FGF9, FGFR1, FLVCR1, GAS1, GDF5, GJA5, GLI2, GLI3, GNA12, GNAQ, GNAS, GREM1, HNF1A, HOXA10, HOXA11, HOXA13, HOXC10, HOXC11, HOXD10, HOXD11, HOXD12, HOXD13, HOXD9, IFT52, IFT88, IMPAD1, KIAA1715, LEF1, LRP5, LRP6, MBD4, MBNL1, MSX1, MSX2, NIPBL,…	[CHD7, CRABP2, HOXC10, TP63]	[ALDH1A2, BMP4, FGF9, FGFR1, GAS1, GLI2, GNA12, GNAQ, HOXA10, HOXA11, HOXA13, MBNL1, MSX2, NOTCH2, PBX1, PRRX1, PTCH1, RAB23, SFRP2, TBX5, TWIST1, ZBTB16, ZNF358]	14.8148	85.1852	Specific for Cluster 2
GO:0035113	GO_BiologicalProcess_16.11.2010_17h17	embryonic appendage morphogenesis	27	29.6703	0.00105289	0.00613785	[ALDH1A2, BMP4, CHD7, CRABP2, FGF9, FGFR1, GAS1, GLI2, GNA12, GNAQ, HOXA10, HOXA11, HOXA13, HOXC10, MBNL1, MSX2, NOTCH2, PBX1, PRRX1, PTCH1, RAB23, SFRP2, TBX5, TP63, TWIST1, ZBTB16, ZNF358]	[ACD, ALDH1A2, ALX1, ALX3, ALX4, BMP4, BMP7, BMPR1A, C2CD3, CHD7, CHST11, CRABP2, CTNNB1, CYP26B1, DICER1, DKK1, DLX5, DLX6, ECE1, EN1, FBN2, FBXW4, FGF4, FGF9, FGFR1, FLVCR1, GAS1, GDF5, GJA5, GLI2, GLI3, GNA12, GNAQ, GNAS, GREM1, HNF1A, HOXA10, HOXA11, HOXA13, HOXC10, HOXC11, HOXD10, HOXD11, HOXD12, HOXD13, HOXD9, IFT52, IFT88, IMPAD1, KIAA1715, LEF1, LRP5, LRP6, MBD4, MBNL1, MSX1, MSX2, NIPBL,…	[CHD7, CRABP2, HOXC10, TP63]	[ALDH1A2, BMP4, FGF9, FGFR1, GAS1, GLI2, GNA12, GNAQ, HOXA10, HOXA11, HOXA13, MBNL1, MSX2, NOTCH2, PBX1, PRRX1, PTCH1, RAB23, SFRP2, TBX5, TWIST1, ZBTB16, ZNF358]	14.8148	85.1852	Specific for Cluster 2
GO:0014706	GO_BiologicalProcess_16.11.2010_17h17	striated muscle tissue development	35	27.3438	0.00109609	0.0062477	[ACTC1, AGRN, CACNB2, CCNB1, CDC2, COL19A1, DCN, ERBB2, ERBB3, FHL2, FOXP1, GATA6, HAND1, IGFBP5, LY6E, MBNL1, MEOX2, MYH11, MYL6, OBSL1, PAX7, PLN, RBP4, RCAN1, SIX1, SIX4, SMAD7, SNTA1, SVIL, TBX5, TGFBR3, TNNC1, TNNT2, TPM1, VEGFA]	[ACTA1, ACTC1, AFG3L2, AGRN, ALS2, APP, ATG5, BMP10, BMP2, CACNA1S, CACNB2, CACNB4, CACNG2, CAV1, CAV2, CBY1, CCNB1, CDC2, CDK5, CHAT, CHRNA1, CHRND, COL19A1, CSRP3, CTSB, CXADR, DCN, DICER1, DMD, DNAJA3, DNER, DVL1, EGLN1, EP300, ERBB2, ERBB3, F2R, FHL2, FKBP1A, FOXC1, FOXC2, FOXL2, FOXP1, FOXP2, GAA, GATA6, GJD3, GPX1, HAND1, HLX, HOMER1, HOXD10, HOXD9, IGFBP5, IGSF8, LMNA, LY6E, MBNL1, MEOX2, …	[AGRN, CCNB1, CDC2, ERBB2, ERBB3, LY6E, PAX7, SIX1, SIX4, TNNC1, VEGFA]	[ACTC1, CACNB2, COL19A1, DCN, FHL2, FOXP1, GATA6, HAND1, IGFBP5, MBNL1, MEOX2, MYH11, MYL6, OBSL1, PLN, RBP4, RCAN1, SMAD7, SNTA1, SVIL, TBX5, TGFBR3, TNNT2, TPM1]	31.4286	68.5714	Specific for Cluster 2
GO:0043069	GO_BiologicalProcess_16.11.2010_17h17	negative regulation of programmed cell death	86	22.3958	0.0010939	0.00630529	[ACVR1, ALOX12, AMIGO2, ANGPT1, AQP1, ARNT2, ATM, BAG3, BCL11B, BCL2, BCL2A1, BCL2L2, BDKRB2, BDNF, BIRC3, BIRC5, BMP4, BNIP3, BTG2, CASP3, CCL2, CDC2, CFDP1, CIDEA, CRYAB, DDAH2, DHCR24, ERBB2, ERBB3, ESR1, EYA1, FAIM2, FAIM3, FGFR1, FOXA1, FURIN, GRIK5, GSTP1, HELLS, HSPA5, HTATIP2, IER3, IGF1, IHH, IL1B, ILK, INDO, IRAK1, KITLG, MAD2L1, MEF2C, MITF, MSH2, MSX2, NCKAP1L, NOTCH2, NPM1, PAX7, PEA…	[AATF, ACVR1, ADA, ADAM17, ADAMTS20, ADNP, ADORA1, ADORA2A, AGXT, AIPL1, AKT1, AKT1S1, AKT2, ALB, ALOX12, AMIGO2, ANGPT1, ANGPT4, ANGPTL4, ANXA1, ANXA4, ANXA5, APC, API5, APOE, APOH, AQP1, ARHGDIA, ARNT2, ASCL1, ASNS, ATF5, ATG5, ATM, AVEN, AZU1, BAG1, BAG3, BAG4, BARD1, BARHL1, BAX, BCL10, BCL11B, BCL2, BCL2A1, BCL2L1, BCL2L10, BCL2L2, BCL3, BCL6, BDKRB2, BDNF, BECN1, BFAR, BIRC3, BIRC5, BIRC6, …	[ALOX12, AMIGO2, BCL11B, BCL2A1, BIRC3, BIRC5, CASP3, CDC2, DHCR24, ERBB2, ERBB3, FAIM3, FOXA1, FURIN, GSTP1, HELLS, HSPA5, HTATIP2, IHH, INDO, IRAK1, MAD2L1, MSH2, NPM1, PAX7, PRAME, PRKCZ, S100A9, SERPINB2, SIX1, SIX4, SMAD3, SOX4, SPHK2, TNFRSF18, TP53, TP63, TP73, TWIST2, VEGFA, XRCC5, YWHAZ]	[ACVR1, ANGPT1, AQP1, ARNT2, ATM, BAG3, BCL2, BCL2L2, BDKRB2, BDNF, BMP4, BNIP3, BTG2, CCL2, CFDP1, CIDEA, CRYAB, DDAH2, ESR1, EYA1, FAIM2, FGFR1, GRIK5, IER3, IGF1, IL1B, ILK, KITLG, MEF2C, MITF, MSX2, NCKAP1L, NOTCH2, PEA15, RBPJ, SOCS2, SQSTM1, STAT5B, TGFB3, TGFBR1, THBS1, TNFAIP3, TSC22D3, VEGFB]	48.8372	51.1628	Common
GO:0046546	GO_BiologicalProcess_16.11.2010_17h17	development of primary male sexual characteristics	24	30.7692	0.00111932	0.00631002	[BCL2, BCL2L11, BIK, BMP6, CCND1, DHCR24, ESR1, FANCA, FGF9, GATA6, GJB2, HOXA13, INHBA, JAG2, KITLG, MGST1, MSH2, PATZ1, RBP4, SDC1, SGPL1, SOX2, TFAP2C, WNT2B]	[ACVR2A, ANKRD7, AREG, ASB1, BCL2, BCL2L1, BCL2L11, BIK, BMP5, BMP6, CCND1, CSDA, CSDE1, CTNNB1, DHCR24, DHH, DMRT1, DMRT2, ESR1, FANCA, FGF10, FGF9, FNDC3A, FSHB, FSHR, GATA4, GATA6, GJB2, HMGB2, HOXA13, HOXD13, HSD17B10, HSD17B3, INHA, INHBA, JAG2, KIT, KITLG, KLHL10, LHB, LHCGR, LHX9, MAMLD1, MAS1, MEA1, MGST1, MSH2, NCOA4, NKX2-1, NR0B1, NR5A1, PATZ1, PDGFRA, PLEKHA1, PRKACG, RBMY1B, RBP4, RE…	[BCL2L11, BIK, CCND1, DHCR24, FANCA, GJB2, INHBA, JAG2, MGST1, MSH2, PATZ1, SDC1, SGPL1, SOX2, TFAP2C]	[BCL2, BMP6, ESR1, FGF9, GATA6, HOXA13, KITLG, RBP4, WNT2B]	62.5	37.5	Common
GO:0051338	GO_BiologicalProcess_16.11.2010_17h17	regulation of transferase activity	90	22.113	0.00128561	0.00716869	[ADCY5, ADORA2B, ADRA2A, ANG, ANGPT1, BDKRB1, BMP4, C5, CAMKK2, CASP3, CBLC, CCND1, CCND2, CCNE2, CD24, CDC25C, CDC6, CDK5R1, CDK7, CDKN2B, CDKN3, CENPE, CERK, CHEK1, CKS1B, CKS2, DGKA, DGKB, DGKZ, DUSP16, DUSP3, DUSP8, DUSP9, EDN2, EDNRA, ERBB2, EREG, FGF13, GADD45B, GADD45G, GHR, GNAQ, HSPA5, IL1B, ILK, IRAK1, ITGA1, KAT2B, KITLG, LATS2, LPAR2, LPAR3, LRRK2, MAP3K5, MAP3K6, MDFI, MS4A1, NPM1, P…	[ACD, ACVR2B, ADAM17, ADAM9, ADCY1, ADCY2, ADCY4, ADCY5, ADCY6, ADCY7, ADCY8, ADNP, ADORA1, ADORA2A, ADORA2B, ADRA2A, ADRA2B, ADRA2C, ADRB2, AGK, AIDA, AKT1, AKT1S1, ALS2, ANAPC2, ANG, ANGPT1, ANKRD54, APC, APOA1, APOE, APP, ARTN, AXIN1, AZU1, BCCIP, BDKRB1, BIRC7, BLM, BMP4, BMP7, C13orf15, C1QTNF2, C5, C5AR1, CALCA, CAMKK2, CARD10, CARD14, CARTPT, CASP3, CAV1, CAV3, CBLC, CCDC88A, CCK, CCND1, C…	[ADORA2B, CASP3, CBLC, CCND1, CCNE2, CD24, CDC25C, CDC6, CDK5R1, CDK7, CDKN3, CENPE, CHEK1, CKS1B, CKS2, DGKA, DGKZ, DUSP9, EDN2, ERBB2, EREG, HSPA5, IRAK1, LPAR2, LPAR3, MAP3K5, MDFI, NPM1, PKIA, PKIB, PKMYT1, PRKCZ, S100A9, SFN, SPHK2, SPRY4, TARBP2, TGFA, TP73, TPX2, TRAF4, TRIB3, VAV2, VAV3]	[ADCY5, ADRA2A, ANG, ANGPT1, BDKRB1, BMP4, C5, CAMKK2, CCND2, CDKN2B, CERK, DGKB, DUSP16, DUSP3, DUSP8, EDNRA, FGF13, GADD45B, GADD45G, GHR, GNAQ, IL1B, ILK, ITGA1, KAT2B, KITLG, LATS2, LRRK2, MAP3K6, MS4A1, PKIG, PKN1, PRKACB, PRKAG2, PRKAR2B, SERTAD1, SFRP2, TGFB3, TGFBR1, THBS1, TPD52L1, TSC2, TSPYL2, VLDLR, ZAK, ZEB2]	48.8889	51.1111	Common
GO:0048565	GO_BiologicalProcess_16.11.2010_17h17	digestive tract development	18	33.9623	0.00130507	0.00719893	[ALDH1A2, BMP4, CCNB1, COL3A1, EPB41L5, FGF9, FOXF2, GATA5, GATA6, GLI2, IHH, SMAD3, TCF21, TGFB3, TGFBR1, THRA, TP63, TP73]	[ACVR2B, ADA, ALDH1A2, ALX4, ASCL1, BBS7, BMP4, CCNB1, COL3A1, CTNNB1, CYP1A1, EDNRB, EP300, EPB41L5, FGF10, FGF9, FOXF2, FOXL1, FOXP4, GATA4, GATA5, GATA6, GLI2, GLI3, HOXA5, IHH, MIXL1, NIPBL, NKX2-2, NKX2-3, NKX2-6, NODAL, NOTCH1, NR1H4, OXTR, PCSK5, RET, RXRA, SALL1, SHH, SMAD2, SMAD3, TCF21, TCF7L2, TGFB1, TGFB3, TGFBR1, THRA, TINAG, TP63, TP73, WNT11, WNT5A]	[CCNB1, IHH, SMAD3, TP63, TP73]	[ALDH1A2, BMP4, COL3A1, EPB41L5, FGF9, FOXF2, GATA5, GATA6, GLI2, TCF21, TGFB3, TGFBR1, THRA]	27.7778	72.2222	Specific for Cluster 2
GO:0006916	GO_BiologicalProcess_16.11.2010_17h17	anti-apoptosis	50	24.7525	0.00132766	0.00724562	[ALOX12, AMIGO2, ANGPT1, BAG3, BCL2, BCL2A1, BCL2L2, BDNF, BIRC3, BIRC5, BNIP3, CCL2, CDC2, CFDP1, CRYAB, DDAH2, DHCR24, ESR1, FAIM2, FAIM3, FOXA1, GSTP1, HELLS, HSPA5, HTATIP2, IER3, IGF1, IL1B, IRAK1, MEF2C, NOTCH2, NPM1, PAX7, PEA15, PRKCZ, SERPINB2, SOCS2, SPHK2, SQSTM1, STAT5B, TGFBR1, THBS1, TNFAIP3, TNFRSF18, TP63, TSC22D3, TWIST2, VEGFA, VEGFB, YWHAZ]	[AATF, ADAM17, AKT1, AKT1S1, ALOX12, AMIGO2, ANGPT1, ANGPT4, ANXA1, ANXA4, ANXA5, API5, APOE, ARHGDIA, ATF5, AVEN, AZU1, BAG1, BAG3, BAG4, BAX, BCL2, BCL2A1, BCL2L1, BCL2L10, BCL2L2, BDNF, BECN1, BFAR, BIRC3, BIRC5, BIRC6, BIRC7, BIRC8, BNIP1, BNIP2, BNIP3, BNIP3L, BRAF, CBX4, CCL2, CD27, CD40LG, CDC2, CDH13, CDKN2D, CEBPB, CERKL, CFDP1, CFLAR, CIAPIN1, CITED2, CLU, COMP, CRYAA, CRYAB, CSF2, DAD1…	[ALOX12, AMIGO2, BCL2A1, BIRC3, BIRC5, CDC2, DHCR24, FAIM3, FOXA1, GSTP1, HELLS, HSPA5, HTATIP2, IRAK1, NPM1, PAX7, PRKCZ, SERPINB2, SPHK2, TNFRSF18, TP63, TWIST2, VEGFA, YWHAZ]	[ANGPT1, BAG3, BCL2, BCL2L2, BDNF, BNIP3, CCL2, CFDP1, CRYAB, DDAH2, ESR1, FAIM2, IER3, IGF1, IL1B, MEF2C, NOTCH2, PEA15, SOCS2, SQSTM1, STAT5B, TGFBR1, THBS1, TNFAIP3, TSC22D3, VEGFB]	48	52	Common
GO:0000070	GO_BiologicalProcess_16.11.2010_17h17	mitotic sister chromatid segregation	14	37.8378	0.00135845	0.00733563	[CCNB1, CDCA5, CENPE, ESPL1, KIF18A, KIFC1, MAD2L1, NCAPG, NCAPH, NDC80, NEK2, NUSAP1, SMC4, ZWINT]	[AKAP8, BUB3, CCDC99, CCNB1, CDC23, CDCA5, CENPE, CHMP1A, DDX11, DLGAP5, DSCC1, ESPL1, KIAA0892, KIF18A, KIF25, KIFC1, MAD2L1, NCAPD2, NCAPD3, NCAPG, NCAPH, NDC80, NEK2, NIPBL, NUSAP1, PDS5B, PINX1, POGZ, PSRC1, RRS1, SEH1L, SMC1A, SMC2, SMC4, TTN, ZW10, ZWINT]	[CCNB1, CDCA5, CENPE, ESPL1, KIF18A, KIFC1, MAD2L1, NCAPG, NCAPH, NDC80, NEK2, NUSAP1, SMC4, ZWINT]	[]	100	0	Specific for Cluster 1
GO:0060348	GO_BiologicalProcess_16.11.2010_17h17	bone development	15	36.5854	0.00138181	0.00738404	[BMP4, BMP6, GHR, HOXA11, HOXB4, MEF2D, NAB1, NAB2, NPR2, OSR2, SFRP2, TGFB3, THBS1, THBS3, TWIST1]	[ACP5, ANKRD11, BGLAP, BMP4, BMP6, CDX1, COL13A1, COL1A1, COL2A1, COL9A1, COMP, DLX5, FGF18, FGF4, FGF8, GHR, GNAS, HOXA11, HOXB4, HOXD11, IMPAD1, LRP5, LRRC17, MEF2D, NAB1, NAB2, NPPC, NPR2, OSR2, PAX1, PEX7, RARG, SBDS, SFRP2, SKI, SOX9, TGFB1, TGFB3, THBS1, THBS3, TWIST1]	[HOXB4]	[BMP4, BMP6, GHR, HOXA11, MEF2D, NAB1, NAB2, NPR2, OSR2, SFRP2, TGFB3, THBS1, THBS3, TWIST1]	6.66667	93.3333	Specific for Cluster 2
GO:0000904	GO_BiologicalProcess_16.11.2010_17h17	cell morphogenesis involved in differentiation	60	23.7154	0.00145234	0.00768094	[ANTXR1, APBB1, ATL1, BCL11B, BCL2, BDNF, BMP4, BVES, CDK5R1, CELSR2, DAB2, DCLK1, DSCAML1, EFNA5, EGR2, EPB41L5, EPHA4, EPHA7, ERBB2, ERBB3, ETV4, FEZ1, FN1, FOXF2, FZD7, GAS1, GLI2, HOXA13, ID1, IHH, ILK, ISL2, LAMC1, LMNB2, LPPR4, MAP1B, MNX1, NDN, NOTCH4, NRP2, NRXN1, NTF3, NTN1, PIP5K1C, PRTFDC1, PTPRZ1, PVRL1, ROBO3, S100B, SDC2, SEMA3B, SIX2, SLC1A3, SLIT2, SLIT3, SLITRK6, SNAI1, SPON2, TG…	[ACTB, ADCY1, AFG3L2, ALCAM, ALS2, AMELX, AMIGO1, ANTXR1, APBB1, APC, APOE, APP, ARX, ATL1, ATOH1, B3GNT2, BAI1, BAIAP2, BCL11B, BCL2, BDNF, BMP2, BMP4, BMP7, BMPR1B, BVES, C1orf187, C21orf33, C22orf28, C5orf13, CABP4, CACNA1A, CACNA1F, CCK, CCKAR, CDH4, CDK5, CDK5R1, CELSR2, CELSR3, CHRNB2, CHST3, CITED1, CLIC5, CNTN2, CNTN4, COL18A1, CREB1, CRYAA, CRYGB, CTNNA2, CTNNB1, CUL3, DAB2, DCC, DCLK1, …	[BCL11B, CDK5R1, CELSR2, EFNA5, EPHA4, ERBB2, ERBB3, ETV4, ID1, IHH, ISL2, LMNB2, MNX1, PTPRZ1, PVRL1, SIX2, SLC1A3, SLITRK6]	[ANTXR1, APBB1, ATL1, BCL2, BDNF, BMP4, BVES, DAB2, DCLK1, DSCAML1, EGR2, EPB41L5, EPHA7, FEZ1, FN1, FOXF2, FZD7, GAS1, GLI2, HOXA13, ILK, LAMC1, LPPR4, MAP1B, NDN, NOTCH4, NRP2, NRXN1, NTF3, NTN1, PIP5K1C, PRTFDC1, ROBO3, S100B, SDC2, SEMA3B, SLIT2, SLIT3, SNAI1, SPON2, TGFBR3, VASP]	30	70	Specific for Cluster 2
GO:0042306	GO_BiologicalProcess_16.11.2010_17h17	regulation of protein import into nucleus	23	30.6667	0.00147833	0.00773858	[AXIN2, BMP4, CDC2, CDH1, FLNA, FZD7, GNAQ, JUP, MDFI, MXI1, PKIA, PKIG, POU5F1, RBPMS, SLC25A23, SMAD3, TACC3, TGFB3, TGFBR1, THRA, TLR2, TXN, WWTR1]	[AKAP1, AKAP5, AXIN1, AXIN2, BAMBI, BCL3, BMP4, BMPR1A, CD27, CDC2, CDH1, CYLD, EDA, EGF, EGFR, EMD, EP300, FAF1, FLNA, FZD7, G3BP2, GLI3, GNAQ, GREM1, IL10, JAK2, JUP, LACRT, MBTPS1, MDFI, MXI1, NF1, NFKBIA, NFKBIB, NFKBIE, NFKBIL1, NFKBIL2, NLRP12, NLRP3, OGG1, PKIA, PKIG, POU5F1, PRDX1, PRKCQ, PSMD10, RBPMS, RHOA, SFRP5, SHH, SIRT1, SLC25A23, SMAD3, SMAD4, SMO, SPHK1, SUFU, TACC3, TAZ, TGFB1, …	[CDC2, CDH1, JUP, MDFI, PKIA, POU5F1, SMAD3, TACC3, TLR2, TXN, WWTR1]	[AXIN2, BMP4, FLNA, FZD7, GNAQ, MXI1, PKIG, RBPMS, SLC25A23, TGFB3, TGFBR1, THRA]	47.8261	52.1739	Common
GO:0042770	GO_BiologicalProcess_16.11.2010_17h17	signal transduction in response to DNA damage	27	29.0323	0.00150635	0.00780564	[ABL1, AEN, ANTXR1, ATM, BRCC3, CCNA2, CCND1, CDC2, CHEK1, CIDEA, DGKZ, DTL, FAM175A, FOXN3, IKBKE, MLH1, MSH2, PLK1, RBM38, RFWD3, RINT1, RRAD, SFN, TP53, TP63, TP73, ZAK]	[ABL1, AEN, AIFM1, ANTXR1, ARTN, ATM, ATRIP, BCL3, BLM, BRCA1, BRCA2, BRCC3, BRE, BRIP1, BRSK1, C16orf5, CCNA2, CCND1, CCNG1, CDC14B, CDC2, CEP63, CHEK1, CHEK2, CIDEA, CIDEB, CLSPN, DGKZ, DTL, DYRK2, ERCC6, FAM175A, FBXO31, FBXO6, FOXN3, FOXO3, FOXO4, FRAG1, FZR1, GADD45A, GML, GRB2, GTSE1, H2AFX, HIPK1, HIPK2, HUS1, IFI16, IKBKE, ING4, KAT5, MAPK14, MBD4, MDC1, MIZF, MLH1, MSH2, MSH6, MYO6, NEK1…	[BRCC3, CCNA2, CCND1, CDC2, CHEK1, DGKZ, DTL, IKBKE, MSH2, PLK1, RFWD3, SFN, TP53, TP63, TP73]	[ABL1, AEN, ANTXR1, ATM, CIDEA, FAM175A, FOXN3, MLH1, RBM38, RINT1, RRAD, ZAK]	55.5556	44.4444	Common
GO:0006260	GO_BiologicalProcess_16.11.2010_17h17	DNA replication	44	25.2874	0.00159773	0.00819634	[ANTXR1, CCNE2, CDC25C, CDC45L, CDC6, CDC7, CDT1, CENPF, CHAF1A, CHEK1, CHTF18, CINP, CTGF, DKC1, DNA2, DTL, FEN1, GINS1, GINS2, HMGA1, IGF1, KRT7, MCM10, MCM3, MCM4, MCM5, MCM7, NFIB, NFIC, NFIX, ORC1L, POLD1, RBBP7, REV3L, RNASEH2A, RRAD, RRM1, RRM2, SSRP1, TERF2IP, TK1, TOP2A, TYMP, TYMS]	[ACHE, ANTXR1, ATRIP, BLM, BRCA2, C10orf2, C8orf45, CCDC111, CCNE2, CDC25A, CDC25C, CDC34, CDC45L, CDC6, CDC7, CDK2, CDK2AP1, CDT1, CENPF, CHAF1A, CHAF1B, CHEK1, CHTF18, CINP, CLSPN, CTGF, DBF4, DKC1, DNA2, DNAJA3, DNAJC2, DNTT, DTL, DUT, E4F1, EGF, ERVK2, ERVK6, FEN1, FHIT, GINS1, GINS2, GINS3, GINS4, HELB, HMGA1, HUS1, IGF1, IGHMBP2, ING4, ING5, KCTD13, KIN, KRT7, LIG1, LIG3, LIG4, LIN9, MBD4, …	[CCNE2, CDC25C, CDC45L, CDC6, CDC7, CDT1, CENPF, CHAF1A, CHEK1, CHTF18, CINP, DKC1, DNA2, DTL, FEN1, GINS1, GINS2, HMGA1, KRT7, MCM10, MCM3, MCM4, MCM5, MCM7, ORC1L, POLD1, RNASEH2A, RRM1, RRM2, SSRP1, TK1, TOP2A, TYMP, TYMS]	[ANTXR1, CTGF, IGF1, NFIB, NFIC, NFIX, RBBP7, REV3L, RRAD, TERF2IP]	77.2727	22.7273	Specific for Cluster 1
GO:0060349	GO_BiologicalProcess_16.11.2010_17h17	bone morphogenesis	13	38.2353	0.00179102	0.00909697	[BMP4, BMP6, GHR, HOXA11, MEF2D, NAB1, NAB2, OSR2, SFRP2, TGFB3, THBS1, THBS3, TWIST1]	[ACP5, BMP4, BMP6, CDX1, COL13A1, COL1A1, COL2A1, COL9A1, COMP, DLX5, FGF18, FGF4, GHR, GNAS, HOXA11, HOXD11, IMPAD1, LRP5, MEF2D, NAB1, NAB2, NPPC, OSR2, PAX1, PEX7, RARG, SFRP2, SKI, SOX9, TGFB1, TGFB3, THBS1, THBS3, TWIST1]	[]	[BMP4, BMP6, GHR, HOXA11, MEF2D, NAB1, NAB2, OSR2, SFRP2, TGFB3, THBS1, THBS3, TWIST1]	0	100	Specific for Cluster 2
GO:0000819	GO_BiologicalProcess_16.11.2010_17h17	sister chromatid segregation	14	36.8421	0.00183139	0.0091214	[CCNB1, CDCA5, CENPE, ESPL1, KIF18A, KIFC1, MAD2L1, NCAPG, NCAPH, NDC80, NEK2, NUSAP1, SMC4, ZWINT]	[AKAP8, BUB3, CCDC99, CCNB1, CDC23, CDCA5, CENPE, CHMP1A, DDX11, DLGAP5, DSCC1, ESPL1, KIAA0892, KIF18A, KIF25, KIFC1, LATS1, MAD2L1, NCAPD2, NCAPD3, NCAPG, NCAPH, NDC80, NEK2, NIPBL, NUSAP1, PDS5B, PINX1, POGZ, PSRC1, RRS1, SEH1L, SMC1A, SMC2, SMC4, TTN, ZW10, ZWINT]	[CCNB1, CDCA5, CENPE, ESPL1, KIF18A, KIFC1, MAD2L1, NCAPG, NCAPH, NDC80, NEK2, NUSAP1, SMC4, ZWINT]	[]	100	0	Specific for Cluster 1
GO:0006633	GO_BiologicalProcess_16.11.2010_17h17	fatty acid biosynthetic process	25	29.4118	0.00181501	0.00912843	[ACACB, ACSM3, ALOX12, ALOX15, C5orf4, CBR4, CH25H, EDN2, ELOVL6, FASN, LPL, MCAT, MGLL, PLA2G5, PLP1, PRKAA2, PRKAB2, PRKAG2, PTGDS, PTGIS, PTGS1, PTPLA, PTPLAD2, S100A9, SCD5]	[ACACA, ACACB, ACSL3, ACSM3, AIFM2, ALOX12, ALOX12B, ALOX15, ALOX15B, ALOX5, ALOX5AP, ALOXE3, C5orf4, CBR4, CD74, CH25H, DEGS1, DEGS2, DGAT2L4, EDN1, EDN2, ELOVL1, ELOVL2, ELOVL3, ELOVL4, ELOVL5, ELOVL6, ELOVL7, FA2H, FADS1, FADS2, FADS3, FAR1, FASN, FCER1A, GGT5, HNF1A, HSD17B8, LIAS, LIPC, LPL, LTA4H, LTC4S, MCAT, MECR, MGLL, MGST2, MLYCD, NDUFAB1, OLAH, OXSM, PECR, PLA2G1B, PLA2G5, PLP1, PRKAA…	[ACSM3, ALOX12, ALOX15, CBR4, EDN2, ELOVL6, FASN, MCAT, S100A9]	[ACACB, C5orf4, CH25H, LPL, MGLL, PLA2G5, PLP1, PRKAA2, PRKAB2, PRKAG2, PTGDS, PTGIS, PTGS1, PTPLA, PTPLAD2, SCD5]	36	64	Common
GO:0046661	GO_BiologicalProcess_16.11.2010_17h17	male sex differentiation	25	29.4118	0.00181501	0.00912843	[BCL2, BCL2L11, BIK, BMP6, CCND1, DHCR24, ESR1, FANCA, FGF9, GATA6, GJB2, HOXA13, INHBA, JAG2, KITLG, MGST1, MSH2, PATZ1, RBP4, SDC1, SGPL1, SOX2, STAT5B, TFAP2C, WNT2B]	[ACVR2A, AMH, AMHR2, ANKRD7, AREG, ASB1, BCL2, BCL2L1, BCL2L11, BIK, BMP5, BMP6, BMPR1A, CCND1, CSDA, CSDE1, CTNNB1, DHCR24, DHH, DMRT1, DMRT2, ESR1, FANCA, FGF10, FGF9, FKBP4, FNDC3A, FSHB, FSHR, GATA4, GATA6, GJB2, HMGB2, HOXA13, HOXD13, HSD17B10, HSD17B3, INHA, INHBA, JAG2, KIT, KITLG, KLHL10, LHB, LHCGR, LHX9, MAMLD1, MAS1, MEA1, MGST1, MSH2, NCOA4, NKX2-1, NR0B1, NR5A1, PATZ1, PDGFRA, PLEKHA…	[BCL2L11, BIK, CCND1, DHCR24, FANCA, GJB2, INHBA, JAG2, MGST1, MSH2, PATZ1, SDC1, SGPL1, SOX2, TFAP2C]	[BCL2, BMP6, ESR1, FGF9, GATA6, HOXA13, KITLG, RBP4, STAT5B, WNT2B]	60	40	Common
GO:0042327	GO_BiologicalProcess_16.11.2010_17h17	positive regulation of phosphorylation	38	26.0274	0.00185394	0.00914491	[ADIPOQ, ANG, ANGPT1, AXIN2, BCL2, BMP4, BMP6, CCNB1, CCND1, CCND2, CTGF, DAB2, EDNRA, EREG, FAM129A, FGF13, FGF7, FZD1, FZD7, GHR, IGF1, IL1B, ILK, ITGA5, KITLG, NCKAP1L, PRKAG2, RBPMS, S100A9, SDCBP, TGFB3, TGFBR1, THBS1, THBS4, TP53, TTK, VEGFA, VEGFB]	[ACVR1B, ADAM17, ADIPOQ, ADNP, AGXT, AKAP5, AKT2, AKTIP, ANG, ANGPT1, ANGPT4, ARTN, AXIN1, AXIN2, BCL10, BCL2, BMP10, BMP2, BMP4, BMP6, BMP7, BMPR1A, BMPR2, CAMP, CARD14, CAV1, CCK, CCNB1, CCND1, CCND2, CCND3, CD3E, CD4, CD44, CD74, CD80, CD81, CLCF1, CNTF, CRYAA, CSF2, CSNK1D, CTGF, DAB2, DOCK7, DSCAM, DVL2, DVL3, EDNRA, EGF, EGFR, ENG, EP300, EPX, EREG, F2, FAM129A, FCER1A, FGF1, FGF10, FGF13, …	[CCNB1, CCND1, EREG, S100A9, TP53, TTK, VEGFA]	[ADIPOQ, ANG, ANGPT1, AXIN2, BCL2, BMP4, BMP6, CCND2, CTGF, DAB2, EDNRA, FAM129A, FGF13, FGF7, FZD1, FZD7, GHR, IGF1, IL1B, ILK, ITGA5, KITLG, NCKAP1L, PRKAG2, RBPMS, SDCBP, TGFB3, TGFBR1, THBS1, THBS4, VEGFB]	18.4211	81.5789	Specific for Cluster 2
GO:0060562	GO_BiologicalProcess_16.11.2010_17h17	epithelial tube morphogenesis	38	26.0274	0.00185394	0.00914491	[BBS4, BCL2, BMP4, CCL11, CELSR1, CTSH, ESR1, EYA1, FGF13, FOXA1, FOXA2, FOXJ1, GLI2, HAND1, HAND2, HHEX, HOXA11, ILK, NTN1, PBX1, PGR, PTCH1, SIX1, SLIT2, SMAD3, SOX17, SOX18, SOX2, SRF, TCF21, TFAP2A, TIMELESS, TSC2, TWIST1, VANGL2, VASP, ZEB2, ZIC2]	[ADM, AGXT, ALX1, APAF1, AREG, BBS4, BBS5, BBS7, BCL10, BCL2, BMP2, BMP4, BTRC, C2CD3, CASP8, CCL11, CD44, CELSR1, CITED1, COQ7, CSF1, CTNNB1, CTNNBIP1, CTSH, CTSZ, DAG1, DEAF1, DLEC1, DVL2, ENG, ESR1, EYA1, FGF10, FGF13, FOXA1, FOXA2, FOXD1, FOXD2, FOXD3, FOXD4, FOXD4L1, FOXD4L3, FOXD4L4, FOXD4L5, FOXD4L6, FOXH1, FOXJ1, FZD6, FZD9, GATA4, GDF7, GJA1, GLI2, GLI3, GPC3, GREM1, GRLF1, GSK3B, GZF1, …	[CELSR1, CTSH, FOXA1, FOXA2, FOXJ1, SIX1, SMAD3, SOX2, TFAP2A, TIMELESS, VANGL2, ZIC2]	[BBS4, BCL2, BMP4, CCL11, ESR1, EYA1, FGF13, GLI2, HAND1, HAND2, HHEX, HOXA11, ILK, NTN1, PBX1, PGR, PTCH1, SLIT2, SOX17, SOX18, SRF, TCF21, TSC2, TWIST1, VASP, ZEB2]	31.5789	68.4211	Specific for Cluster 2
GO:0030336	GO_BiologicalProcess_16.11.2010_17h17	negative regulation of cell migration	21	30.8824	0.00211645	0.0102428	[ACVRL1, ANGPT2, BCL2, C5, CHRD, CLIC4, FGF13, IGFBP3, IGFBP5, ILK, PODN, PTPRU, RBPJ, RRAS, SFRP2, SLIT2, SMAD7, TBX5, THBS1, TPM1, VCL]	[ABHD2, ACVRL1, ADA, ADORA1, AGTR2, ALOX15B, ANGPT2, ANGPT4, APOE, APOH, ARAP3, BCL2, BMP10, C5, CD63, CHRD, CITED2, CLIC4, DAG1, DLEC1, DLL4, DRD1, DRD2, DRD5, EGFL7, FGF13, GDF2, GREM1, GTPBP4, HDAC5, HOXA7, IGFBP3, IGFBP5, ILK, MCC, MIA3, NF1, NF2, NISCH, NKX2-1, NR2F2, PDGFB, PODN, PTEN, PTPRK, PTPRM, PTPRU, RAP2C, RBPJ, RNF20, RRAS, SEMA3A, SERPINE1, SFRP1, SFRP2, SHH, SLIT2, SMAD7, TBX5, TG…	[ANGPT2, IGFBP3, PTPRU]	[ACVRL1, BCL2, C5, CHRD, CLIC4, FGF13, IGFBP5, ILK, PODN, RBPJ, RRAS, SFRP2, SLIT2, SMAD7, TBX5, THBS1, TPM1, VCL]	14.2857	85.7143	Specific for Cluster 2
GO:2000146	GO_BiologicalProcess_16.11.2010_17h17	negative regulation of cell motility	21	30.8824	0.00211645	0.0102428	[ACVRL1, ANGPT2, BCL2, C5, CHRD, CLIC4, FGF13, IGFBP3, IGFBP5, ILK, PODN, PTPRU, RBPJ, RRAS, SFRP2, SLIT2, SMAD7, TBX5, THBS1, TPM1, VCL]	[ABHD2, ACVRL1, ADA, ADORA1, AGTR2, ALOX15B, ANGPT2, ANGPT4, APOE, APOH, ARAP3, BCL2, BMP10, C5, CD63, CHRD, CITED2, CLIC4, DAG1, DLEC1, DLL4, DRD1, DRD2, DRD5, EGFL7, FGF13, GDF2, GREM1, GTPBP4, HDAC5, HOXA7, IGFBP3, IGFBP5, ILK, MCC, MIA3, NF1, NF2, NISCH, NKX2-1, NR2F2, PDGFB, PODN, PTEN, PTPRK, PTPRM, PTPRU, RAP2C, RBPJ, RNF20, RRAS, SEMA3A, SERPINE1, SFRP1, SFRP2, SHH, SLIT2, SMAD7, TBX5, TG…	[ANGPT2, IGFBP3, PTPRU]	[ACVRL1, BCL2, C5, CHRD, CLIC4, FGF13, IGFBP5, ILK, PODN, RBPJ, RRAS, SFRP2, SLIT2, SMAD7, TBX5, THBS1, TPM1, VCL]	14.2857	85.7143	Specific for Cluster 2
GO:0017015	GO_BiologicalProcess_16.11.2010_17h17	regulation of transforming growth factor beta receptor signaling pathway	18	32.7273	0.00210019	0.0102609	[ASPN, CDKN2B, CIDEA, FBN1, FURIN, HSPA5, HTRA1, LTBP1, LTBP4, ONECUT2, SMAD3, SMAD7, SMURF1, TGFB1I1, TGFB3, THBS1, TP53, ZEB1]	[ADAM17, ADAMTSL2, ASPN, BAMBI, BCL9, BCL9L, C5orf13, CDKN1C, CDKN2B, CHST11, CIDEA, CITED1, CITED2, DAND5, EID2, ENG, FBN1, FBN2, FURIN, GIPC1, HIPK2, HSPA5, HTRA1, IL17F, ING3, ITGA8, LEMD3, LTBP1, LTBP4, MEN1, NKX2-1, ONECUT1, ONECUT2, PEG10, PIN1, PRDM16, SKI, SKIL, SMAD2, SMAD3, SMAD4, SMAD6, SMAD7, SMURF1, SMURF2, SNX6, STK11, TDGF3, TGFB1, TGFB1I1, TGFB3, THBS1, TP53, TRIM33, ZEB1]	[FURIN, HSPA5, ONECUT2, SMAD3, SMURF1, TP53]	[ASPN, CDKN2B, CIDEA, FBN1, HTRA1, LTBP1, LTBP4, SMAD7, TGFB1I1, TGFB3, THBS1, ZEB1]	33.3333	66.6667	Specific for Cluster 2
GO:0007050	GO_BiologicalProcess_16.11.2010_17h17	cell cycle arrest	30	27.5229	0.00214802	0.0102985	[APBB1, ATM, CDKN2B, CDKN3, COMMD5, DDIT3, DHCR24, GAS1, GAS2, GAS7, HRAS, ILK, INHBA, IRF6, KAT2B, MSH2, NOTCH2, PKD1, PKD2, PLAGL1, PPM1G, PPP1R15A, RBM38, SMAD3, SOX2, THBS1, TP53, TP63, TP73, ZAK]	[AIF1, APBB1, APBB2, APC, ARTN, ATM, BARD1, BTG4, CALR, CDC123, CDKN1B, CDKN1C, CDKN2A, CDKN2B, CDKN2C, CDKN2D, CDKN3, CGREF1, CGRRF1, COMMD5, CUL1, CUL2, CUL3, CUL4A, CUL5, CYP27B1, DDIT3, DHCR24, DST, EIF4G2, ERN1, ERN2, FOXO4, GADD45A, GAS1, GAS2, GAS2L1, GAS2L2, GAS2L3, GAS7, HBP1, HEPACAM, HRAS, IFNG, IFNW1, IL12A, IL12B, IL8, ILK, ING4, INHA, INHBA, IRF6, JMY, KAT2B, KHDRBS1, KIAA1967, KIF2…	[CDKN3, COMMD5, DHCR24, GAS2, HRAS, INHBA, IRF6, MSH2, PPM1G, SMAD3, SOX2, TP53, TP63, TP73]	[APBB1, ATM, CDKN2B, DDIT3, GAS1, GAS7, ILK, KAT2B, NOTCH2, PKD1, PKD2, PLAGL1, PPP1R15A, RBM38, THBS1, ZAK]	46.6667	53.3333	Common
GO:0051271	GO_BiologicalProcess_16.11.2010_17h17	negative regulation of cellular component movement	22	30.137	0.00237197	0.0112669	[ACVRL1, ANGPT2, BCL2, C5, CHRD, CLIC4, FGF13, IGFBP3, IGFBP5, ILK, PODN, PTPRU, RBPJ, RRAS, SFRP2, SLIT2, SMAD7, TBX5, TGFBR3, THBS1, TPM1, VCL]	[ABHD2, ACTN1, ACTN4, ACVRL1, ADA, ADORA1, AGTR2, ALOX15B, ANGPT2, ANGPT4, APOE, APOH, ARAP3, BCL2, BMP10, C5, CD63, CHRD, CITED2, CLIC4, DAG1, DLEC1, DLL4, DRD1, DRD2, DRD5, EGFL7, FGF13, GDF2, GREM1, GTPBP4, HDAC5, HOXA7, IGFBP3, IGFBP5, ILK, MCC, MIA3, NF1, NF2, NISCH, NKX2-1, NR2F2, PDGFB, PKHD1, PODN, PTEN, PTPRK, PTPRM, PTPRU, RAP2C, RBPJ, RNF20, RRAS, SEMA3A, SERPINE1, SFRP1, SFRP2, SHH, S…	[ANGPT2, IGFBP3, PTPRU]	[ACVRL1, BCL2, C5, CHRD, CLIC4, FGF13, IGFBP5, ILK, PODN, RBPJ, RRAS, SFRP2, SLIT2, SMAD7, TBX5, TGFBR3, THBS1, TPM1, VCL]	13.6364	86.3636	Specific for Cluster 2
GO:0051147	GO_BiologicalProcess_16.11.2010_17h17	regulation of muscle cell differentiation	14	35.8974	0.00243313	0.0114513	[AGRN, BCL2, BMP4, BOC, CAMK1, EREG, HDAC4, IGFBP3, ILK, PRDM6, SRF, THRA, TSHZ3, ZEB1]	[AGRN, BCL2, BMP4, BOC, BTG1, CAMK1, CAV3, EDN1, EP300, EREG, FOXO4, FOXO6, HDAC1, HDAC3, HDAC4, HDAC5, HDAC9, IGFBP3, ILK, ITGB1BP3, MBNL3, MESP1, MYOCD, NEU2, NKX2-5, NOTCH1, NRG1, PIAS1, PRDM6, PROX1, SHH, SOX8, SOX9, SRF, TBX3, THRA, TSHZ3, ZEB1, ZFHX3]	[AGRN, EREG, IGFBP3]	[BCL2, BMP4, BOC, CAMK1, HDAC4, ILK, PRDM6, SRF, THRA, TSHZ3, ZEB1]	21.4286	78.5714	Specific for Cluster 2
GO:0031325	GO_BiologicalProcess_16.11.2010_17h17	positive regulation of cellular metabolic process	202	19.5736	0.00245547	0.0114514	[AADAC, ACVR1, ACVRL1, ADIPOQ, ADORA2B, ADRA2A, ADRB1, AGRN, AGTR1, AKAP12, ANAPC10, ANG, ANGPT1, APEX1, ARNT2, ARRB1, ATF7IP, ATXN1, ATXN7L3, AXIN2, BARX2, BCL11B, BCL2, BMP3, BMP4, BMP6, BRCC3, BVES, C19orf10, CAMKK2, CARD11, CCNA2, CCNB1, CCND1, CCND2, CCNE1, CDC2, CDC20, CDK7, COMT, CREB3L4, CREB5, CTGF, DAB2, DDIT3, DNA2, E2F1, EBF1, EBF3, EDNRA, EGR2, EHF, EIF5A2, EREG, ESRRA, EYA1, F12, FA…	[AADAC, AATF, ABCA1, ABHD5, ABLIM3, ABRA, ACSL5, ACSL6, ACVR1, ACVR1B, ACVRL1, ADAM17, ADAM9, ADCY7, ADIPOQ, ADNP, ADORA1, ADORA2A, ADORA2B, ADRA1B, ADRA2A, ADRB1, ADRB2, AFAP1L2, AGRN, AGTR1, AGTR2, AGXT, AHR, AIFM2, AKAP12, AKAP5, AKIRIN2, AKT1, AKT2, AKTIP, ALX1, ALX4, ANAPC1, ANAPC10, ANAPC11, ANAPC2, ANAPC4, ANAPC5, ANAPC7, ANG, ANGPT1, ANGPT4, ANKRD49, ANXA3, APEX1, APOA1, APOA4, APOA5, APO…	[AADAC, ADORA2B, ADRB1, AGRN, ANAPC10, APEX1, ATF7IP, ATXN7L3, BARX2, BCL11B, BMP3, BRCC3, C19orf10, CARD11, CCNA2, CCNB1, CCND1, CCNE1, CDC2, CDC20, CDK7, COMT, CREB3L4, DNA2, E2F1, EHF, EREG, ESRRA, F12, FBXO5, FOXA1, FOXA2, FURIN, GRHL3, HMGA1, HRAS, HSPA5, IHH, IKZF2, INHBA, IRAK1, IRF6, ITGA2, KLF5, MUC1, NPM1, ONECUT2, PAX8, PAX9, PCBD1, PLK1, POU2F1, POU5F1, PRKDC, PSMA4, PSMA5, PSMB2, PSM…	[ACVR1, ACVRL1, ADIPOQ, ADRA2A, AGTR1, AKAP12, ANG, ANGPT1, ARNT2, ARRB1, ATXN1, AXIN2, BCL2, BMP4, BMP6, BVES, CAMKK2, CCND2, CREB5, CTGF, DAB2, DDIT3, EBF1, EBF3, EDNRA, EGR2, EIF5A2, EYA1, FAM129A, FAM175A, FGF13, FGF7, FHL2, FOXF1, FOXF2, FOXJ2, FSTL3, FZD1, FZD4, FZD7, GATA6, GHR, GLI2, GLIS2, HAND1, HAND2, HDAC4, HHEX, HOXA13, ICAM1, IGF1, IL1B, ILK, ITGA5, JUN, KAT2B, KITLG, KLF15, LPIN2, …	42.5743	57.4257	Common
GO:0006874	GO_BiologicalProcess_16.11.2010_17h17	cellular calcium ion homeostasis	46	24.4681	0.00258115	0.011718	[AGTR1, ATP1A2, ATP7B, BCL2, BDKRB1, BDKRB2, CACNA1C, CCL11, CCL2, CCRL1, CD24, CNOT6, CXCL12, CXCL13, EDN2, EDNRA, EPHX2, FXYD1, GNA15, GRIK5, IL1B, ITPR1, ITPR3, JPH2, KCNA5, KCNK3, LPAR2, LPAR3, P2RY2, PGM5, PKD2, PLN, PYGM, RGN, RIC3, RYR2, RYR3, S1PR3, SAA1, SLC24A3, SLC8A1, SYPL2, TAC1, TGM2, TRPC1, TRPV4]	[ADM, ADRA1A, AGTR1, ANXA7, APOE, APP, ATP1A2, ATP2A1, ATP2A2, ATP2C1, ATP7B, AVP, AVPR1A, AVPR1B, BCL2, BDKRB1, BDKRB2, C3AR1, C5AR1, CACNA1A, CACNA1C, CACNA1F, CACNA1G, CACNB4, CALCA, CALCB, CALCR, CALR, CASR, CAV1, CAV3, CBARA1, CCBP2, CCKAR, CCKBR, CCL1, CCL11, CCL13, CCL14, CCL15, CCL19, CCL2, CCL23, CCL3, CCL5, CCL7, CCR1, CCR2, CCR3, CCR5, CCR6, CCR7, CCR8, CCRL1, CD24, CD38, CD52, CD55, C…	[ATP7B, CD24, CNOT6, CXCL13, EDN2, GNA15, ITPR3, LPAR2, LPAR3, P2RY2, SAA1, TAC1, TRPV4]	[AGTR1, ATP1A2, BCL2, BDKRB1, BDKRB2, CACNA1C, CCL11, CCL2, CCRL1, CXCL12, EDNRA, EPHX2, FXYD1, GRIK5, IL1B, ITPR1, JPH2, KCNA5, KCNK3, PGM5, PKD2, PLN, PYGM, RGN, RIC3, RYR2, RYR3, S1PR3, SLC24A3, SLC8A1, SYPL2, TGM2, TRPC1]	28.2609	71.7391	Specific for Cluster 2
GO:0051146	GO_BiologicalProcess_16.11.2010_17h17	striated muscle cell differentiation	25	28.7356	0.00257983	0.0118165	[ACTC1, AGRN, BARX2, CACNA1H, CACNB2, CCNB1, CDC2, CDON, ERBB2, FHL2, FOXP1, GATA6, IGF1, KRT19, MYH11, OBSL1, RCAN1, SDC1, SNTA1, TBX5, TMOD1, TNNC1, TNNT2, TPM1, VEGFA]	[ACTA1, ACTC1, ADAM12, AFG3L2, AGRN, ALS2, APP, ATG5, AVPR1A, BARX2, BMP10, CACNA1H, CACNA1S, CACNB2, CACNB4, CACNG2, CAPN2, CASP1, CAV2, CBY1, CCNB1, CDC2, CDON, CHAT, CHRNA1, CHRNB1, CHUK, CXADR, DICER1, DNAJA3, DNER, DVL1, DYRK1B, ERBB2, F2R, FHL2, FOXP1, GATA6, GPX1, HOMER1, IGF1, KCNH1, KRT19, LMNA, MESP1, MTPN, MUSK, MYH11, MYH6, MYH9, MYL2, MYOD1, MYOG, MYOZ1, NEO1, NEURL2, NKX2-5, NKX2-6,…	[AGRN, BARX2, CCNB1, CDC2, ERBB2, KRT19, SDC1, TNNC1, VEGFA]	[ACTC1, CACNA1H, CACNB2, CDON, FHL2, FOXP1, GATA6, IGF1, MYH11, OBSL1, RCAN1, SNTA1, TBX5, TMOD1, TNNT2, TPM1]	36	64	Common
GO:0051260	GO_BiologicalProcess_16.11.2010_17h17	protein homooligomerization	28	27.7228	0.00264438	0.0118997	[ADIPOQ, ANGPT1, ATL1, ATL3, C1QTNF1, C1QTNF7, CBR4, CDH1, COASY, COLEC12, CRYAB, GPX3, ITPR3, LNX1, MUC20, NACC1, P2RX1, PCBD1, PEX14, S100A9, SCARA5, SRR, STOM, TAF10, TGM2, TK1, TP63, TSC2]	[ACTN2, ADIPOQ, AKR1C1, ALAD, ALDH5A1, ALDOC, ALOX5AP, ANGPT1, ANGPTL4, ANXA5, AQP11, ATG16L1, ATL1, ATL2, ATL3, ATPIF1, BAX, BCL10, C10orf2, C1QTNF1, C1QTNF2, C1QTNF7, CAV1, CBR4, CCDC88C, CDA, CDH1, CEP57, COASY, COLEC12, CPT1A, CRYAA, CRYAB, CRYZ, DECR1, DGKD, DHPS, DPYS, EIF2AK3, GCH1, GNMT, GOPC, GPX3, HAO2, HPRT1, HSD17B10, HSF4, IDE, IGHMBP2, ITPR3, LGI1, LNX1, LNX2, LONP1, MUC20, NACC1, N…	[ATL3, CBR4, CDH1, COASY, ITPR3, LNX1, MUC20, NACC1, PCBD1, S100A9, TAF10, TK1, TP63]	[ADIPOQ, ANGPT1, ATL1, C1QTNF1, C1QTNF7, COLEC12, CRYAB, GPX3, P2RX1, PEX14, SCARA5, SRR, STOM, TGM2, TSC2]	46.4286	53.5714	Common
GO:0019318	GO_BiologicalProcess_16.11.2010_17h17	hexose metabolic process	45	24.5902	0.00257555	0.0119032	[ADIPOQ, ATF3, CREM, CRYAB, DHTKD1, ENO1, ENO2, EPM2A, FBP1, FUT2, GALE, GALK2, GAPDH, GFPT2, GMDS, GPD2, GYG1, GYG2, HIBADH, HOOK1, KHK, KIF2A, LDHA, MAN2A2, PDHA1, PDK3, PDK4, PFKFB4, PFKL, PGD, PGK1, PGLS, PGM5, PKM2, PPARGC1A, PPP1CA, PPP1R1A, PPP1R3B, PRKAG2, PYGB, PYGM, RBP4, RPIA, SLC35A2, TSTA3]	[ADIPOQ, ADPGK, AGL, AKR1A1, ALDH5A1, ALDOA, ALDOB, ALDOC, ATF3, ATF4, B3GALTL, B4GALT1, BAD, BPGM, BRS3, CACNA1A, CHST1, CPT1A, CREM, CRYAB, CYP21A2, DCXR, DHTKD1, DLAT, ENO1, ENO2, ENO3, EPM2A, FBP1, FBP2, FPGT, FUCA1, FUCA2, FUT1, FUT10, FUT2, FUT4, FUT5, FUT6, FUT7, FUT8, FUT9, G6PC, G6PC2, G6PC3, GAA, GALE, GALK1, GALK2, GALM, GALT, GAPDH, GAPDHS, GBE1, GFPT1, GFPT2, GHRL, GMDS, GNMT, GPD1, …	[DHTKD1, ENO1, FBP1, FUT2, GALE, GALK2, GAPDH, GMDS, GPD2, HOOK1, KIF2A, LDHA, PDHA1, PDK3, PFKFB4, PFKL, PGD, PGK1, PGLS, PKM2, PPP1CA, RPIA, SLC35A2, TSTA3]	[ADIPOQ, ATF3, CREM, CRYAB, ENO2, EPM2A, GFPT2, GYG1, GYG2, HIBADH, KHK, MAN2A2, PDK4, PGM5, PPARGC1A, PPP1R1A, PPP1R3B, PRKAG2, PYGB, PYGM, RBP4]	53.3333	46.6667	Common
GO:0010562	GO_BiologicalProcess_16.11.2010_17h17	positive regulation of phosphorus metabolic process	38	25.5034	0.00273099	0.0121826	[ADIPOQ, ANG, ANGPT1, AXIN2, BCL2, BMP4, BMP6, CCNB1, CCND1, CCND2, CTGF, DAB2, EDNRA, EREG, FAM129A, FGF13, FGF7, FZD1, FZD7, GHR, IGF1, IL1B, ILK, ITGA5, KITLG, NCKAP1L, PRKAG2, RBPMS, S100A9, SDCBP, TGFB3, TGFBR1, THBS1, THBS4, TP53, TTK, VEGFA, VEGFB]	[ACVR1B, ADAM17, ADIPOQ, ADNP, ADORA1, AGXT, AKAP5, AKT2, AKTIP, ANG, ANGPT1, ANGPT4, ARTN, AXIN1, AXIN2, BCL10, BCL2, BMP10, BMP2, BMP4, BMP6, BMP7, BMPR1A, BMPR2, CAMP, CARD14, CAV1, CCK, CCNB1, CCND1, CCND2, CCND3, CD3E, CD4, CD44, CD74, CD80, CD81, CLCF1, CNTF, CRYAA, CSF2, CSNK1D, CTGF, DAB2, DLEC1, DOCK7, DSCAM, DVL2, DVL3, EDNRA, EGF, EGFR, ENG, EP300, EPX, EREG, F2, FAM129A, FCER1A, FGF1,…	[CCNB1, CCND1, EREG, S100A9, TP53, TTK, VEGFA]	[ADIPOQ, ANG, ANGPT1, AXIN2, BCL2, BMP4, BMP6, CCND2, CTGF, DAB2, EDNRA, FAM129A, FGF13, FGF7, FZD1, FZD7, GHR, IGF1, IL1B, ILK, ITGA5, KITLG, NCKAP1L, PRKAG2, RBPMS, SDCBP, TGFB3, TGFBR1, THBS1, THBS4, VEGFB]	18.4211	81.5789	Specific for Cluster 2
GO:0045937	GO_BiologicalProcess_16.11.2010_17h17	positive regulation of phosphate metabolic process	38	25.5034	0.00273099	0.0121826	[ADIPOQ, ANG, ANGPT1, AXIN2, BCL2, BMP4, BMP6, CCNB1, CCND1, CCND2, CTGF, DAB2, EDNRA, EREG, FAM129A, FGF13, FGF7, FZD1, FZD7, GHR, IGF1, IL1B, ILK, ITGA5, KITLG, NCKAP1L, PRKAG2, RBPMS, S100A9, SDCBP, TGFB3, TGFBR1, THBS1, THBS4, TP53, TTK, VEGFA, VEGFB]	[ACVR1B, ADAM17, ADIPOQ, ADNP, ADORA1, AGXT, AKAP5, AKT2, AKTIP, ANG, ANGPT1, ANGPT4, ARTN, AXIN1, AXIN2, BCL10, BCL2, BMP10, BMP2, BMP4, BMP6, BMP7, BMPR1A, BMPR2, CAMP, CARD14, CAV1, CCK, CCNB1, CCND1, CCND2, CCND3, CD3E, CD4, CD44, CD74, CD80, CD81, CLCF1, CNTF, CRYAA, CSF2, CSNK1D, CTGF, DAB2, DLEC1, DOCK7, DSCAM, DVL2, DVL3, EDNRA, EGF, EGFR, ENG, EP300, EPX, EREG, F2, FAM129A, FCER1A, FGF1,…	[CCNB1, CCND1, EREG, S100A9, TP53, TTK, VEGFA]	[ADIPOQ, ANG, ANGPT1, AXIN2, BCL2, BMP4, BMP6, CCND2, CTGF, DAB2, EDNRA, FAM129A, FGF13, FGF7, FZD1, FZD7, GHR, IGF1, IL1B, ILK, ITGA5, KITLG, NCKAP1L, PRKAG2, RBPMS, SDCBP, TGFB3, TGFBR1, THBS1, THBS4, VEGFB]	18.4211	81.5789	Specific for Cluster 2
GO:0043410	GO_BiologicalProcess_16.11.2010_17h17	positive regulation of MAPKKK cascade	26	28.2609	0.00276317	0.0122199	[ANGPT1, ARRB1, ARRB2, BMP4, CD36, EDA2R, ERBB2, FGF13, FGF9, FGFR1, FZD7, HRAS, IL1B, ILK, KL, LPAR2, LPAR3, MAPK8IP2, S100A7, S100A9, SDCBP, SORBS3, SOX2, TPD52L1, TRAF4, VEGFB]	[ADRA1A, ADRB2, ADRB3, AGXT, ANGPT1, AREG, ARRB1, ARRB2, AXIN1, BMP4, BMPER, BRAF, C11orf59, CARD9, CD27, CD36, CD44, CD74, CNTF, CTNNB1, DCC, EDA2R, ERBB2, F2R, FGF10, FGF13, FGF18, FGF19, FGF21, FGF23, FGF4, FGF9, FGFR1, FZD7, GPR55, GRM4, HIPK2, HRAS, IGF1R, IGF2, IL11, IL1A, IL1B, IL26, IL6, IL6R, ILK, INS, INSR, KL, KLB, LEP, LEPROT, LIF, LPAR2, LPAR3, MAP3K7, MAPK8IP2, MID1, NENF, NOD1, NOD…	[ERBB2, HRAS, LPAR2, LPAR3, MAPK8IP2, S100A7, S100A9, SOX2, TRAF4]	[ANGPT1, ARRB1, ARRB2, BMP4, CD36, EDA2R, FGF13, FGF9, FGFR1, FZD7, IL1B, ILK, KL, SDCBP, SORBS3, TPD52L1, VEGFB]	34.6154	65.3846	Common
GO:0012502	GO_BiologicalProcess_16.11.2010_17h17	induction of programmed cell death	71	22.327	0.00307468	0.013367	[ABL1, AEN, ARHGEF16, ARHGEF9, ATM, BAK1, BCL2L11, BID, BIK, BNIP3, CASP2, CASP3, CD24, CD70, CIDEA, COL4A3, CRH, DAPK3, DEDD2, ECT2, EI24, FADD, GRIK5, HTATIP2, IFI27, IKBKE, INHBA, MAP3K5, MLH1, MSH2, NACC1, NGEF, NGFRAP1, NOTCH2, NR4A1, NUPR1, OBSCN, PDCD6, PERP, PLAGL1, PMAIP1, PRODH, PRUNE2, PYCARD, RYR2, SFN, SH3RF1, SMAD3, SMPD2, SQSTM1, STAT1, TBX5, TFPT, TGFB3, TGFBR1, TGM2, THBS1, TIAM2…	[AATF, ABL1, ABR, ACVR1B, ADORA1, ADORA2A, AEN, AIFM1, AIFM2, AIFM3, AKAP13, ALOX15B, APH1A, APH1B, APOE, APP, ARHGAP4, ARHGEF11, ARHGEF12, ARHGEF16, ARHGEF17, ARHGEF18, ARHGEF2, ARHGEF3, ARHGEF4, ARHGEF6, ARHGEF7, ARHGEF9, ATM, BAD, BAK1, BAX, BBC3, BCL10, BCL2L11, BCL2L13, BCL3, BCLAF1, BID, BIK, BNIP1, BNIP3, BNIP3L, BNIPL, BOK, BRCA1, BRCA2, BTK, C16orf5, C6, C9, CADM1, CASP1, CASP10, CASP2, …	[ARHGEF16, BAK1, BCL2L11, BID, BIK, CASP2, CASP3, CD24, CD70, CRH, DEDD2, ECT2, EI24, FADD, HTATIP2, IFI27, IKBKE, INHBA, MAP3K5, MSH2, NACC1, NGEF, NGFRAP1, OBSCN, PDCD6, PERP, PMAIP1, PRODH, PYCARD, SFN, SH3RF1, SMAD3, SMPD2, STAT1, TFPT, TLR2, TNFRSF25, TNFSF10, TP53, TP53I3, TP63, TP73, TRAF3, TUBB2C, UNC13D, VAV2, VAV3]	[ABL1, AEN, ARHGEF9, ATM, BNIP3, CIDEA, COL4A3, DAPK3, GRIK5, MLH1, NOTCH2, NR4A1, NUPR1, PLAGL1, PRUNE2, RYR2, SQSTM1, TBX5, TGFB3, TGFBR1, TGM2, THBS1, TIAM2, TPD52L1]	66.1972	33.8028	Specific for Cluster 1
GO:0010740	GO_BiologicalProcess_16.11.2010_17h17	positive regulation of intracellular protein kinase cascade	54	23.4783	0.00306131	0.0134227	[ADIPOQ, AKAP12, ANGPT1, ARRB1, ARRB2, BMP4, C18orf32, CARD11, CD36, ECM1, ECT2, EDA2R, ERBB2, FADD, FAM110A, FGF13, FGF9, FGFR1, FLNA, FZD7, GHR, GPR177, HRAS, IGF1, IKBKE, IL1B, ILK, KL, LPAR2, LPAR3, LTBR, MAPK8IP2, PRKCB, S100A7, S100A9, S100B, SDCBP, SLC20A1, SLC35B2, SORBS3, SOX2, TERF2IP, TGFBR1, TGM2, THBS1, TNFSF10, TPD52L1, TRAF4, TRAF5, TSPAN6, UBD, VEGFB, ZDHHC13, ZDHHC17]	[ADIPOQ, ADRA1A, ADRB2, ADRB3, AGXT, AKAP12, AKAP5, ANGPT1, APOL3, AREG, ARRB1, ARRB2, ATP2C1, AXIN1, BCL10, BIRC2, BMP4, BMPER, BRAF, BST2, C11orf59, C18orf32, CANT1, CARD11, CARD9, CASP1, CASP10, CASP8, CC2D1A, CD27, CD36, CD40, CD44, CD74, CFLAR, CHUK, CLCF1, CNTF, CSF2, CTNNB1, CXXC5, DCC, ECM1, ECT2, EDA, EDA2R, EEF1D, EGFR, EPX, ERBB2, F2R, F3, F7, FADD, FAM110A, FASLG, FGF10, FGF13, FGF18,…	[CARD11, ECT2, ERBB2, FADD, FAM110A, HRAS, IKBKE, LPAR2, LPAR3, LTBR, MAPK8IP2, S100A7, S100A9, SLC20A1, SLC35B2, SOX2, TNFSF10, TRAF4, TSPAN6, UBD, ZDHHC13]	[ADIPOQ, AKAP12, ANGPT1, ARRB1, ARRB2, BMP4, C18orf32, CD36, ECM1, EDA2R, FGF13, FGF9, FGFR1, FLNA, FZD7, GHR, GPR177, IGF1, IL1B, ILK, KL, PRKCB, S100B, SDCBP, SORBS3, TERF2IP, TGFBR1, TGM2, THBS1, TPD52L1, TRAF5, VEGFB, ZDHHC17]	38.8889	61.1111	Common
GO:0033674	GO_BiologicalProcess_16.11.2010_17h17	positive regulation of kinase activity	57	23.1707	0.00325721	0.0140416	[ADCY5, ADORA2B, ADRA2A, ANG, ANGPT1, BDKRB1, BMP4, C5, CCND1, CCND2, CD24, CENPE, CERK, DGKA, DGKB, DGKZ, EDN2, EDNRA, ERBB2, EREG, FGF13, GADD45B, GADD45G, GHR, HSPA5, IL1B, ILK, IRAK1, ITGA1, KITLG, LPAR2, LPAR3, LRRK2, MAP3K5, MAP3K6, MDFI, MS4A1, NPM1, PKN1, PRKACB, PRKAG2, PRKAR2B, PRKCZ, S100A9, SPHK2, TGFA, TGFB3, TGFBR1, THBS1, TPD52L1, TPX2, TRAF4, VAV2, VAV3, VLDLR, ZAK, ZEB2]	[ACVR2B, ADAM17, ADAM9, ADCY1, ADCY2, ADCY4, ADCY5, ADCY6, ADCY7, ADCY8, ADNP, ADORA1, ADORA2A, ADORA2B, ADRA2A, ADRA2B, ADRA2C, ADRB2, AGK, AKT1, ALS2, ANG, ANGPT1, ARTN, AXIN1, AZU1, BDKRB1, BIRC7, BMP4, C1QTNF2, C5, C5AR1, CALCA, CARD10, CARD14, CARTPT, CCDC88A, CCK, CCND1, CCND2, CCND3, CCNY, CD24, CD4, CD74, CD81, CDK5, CENPE, CERK, CERKL, CHRFAM7A, CHRM1, CHRNA3, CLSPN, CSF1, CXCR4, DAB1, D…	[ADORA2B, CCND1, CD24, CENPE, DGKA, DGKZ, EDN2, ERBB2, EREG, HSPA5, IRAK1, LPAR2, LPAR3, MAP3K5, MDFI, NPM1, PRKCZ, S100A9, SPHK2, TGFA, TPX2, TRAF4, VAV2, VAV3]	[ADCY5, ADRA2A, ANG, ANGPT1, BDKRB1, BMP4, C5, CCND2, CERK, DGKB, EDNRA, FGF13, GADD45B, GADD45G, GHR, IL1B, ILK, ITGA1, KITLG, LRRK2, MAP3K6, MS4A1, PKN1, PRKACB, PRKAG2, PRKAR2B, TGFB3, TGFBR1, THBS1, TPD52L1, VLDLR, ZAK, ZEB2]	42.1053	57.8947	Common
GO:0007218	GO_BiologicalProcess_16.11.2010_17h17	neuropeptide signaling pathway	24	28.5714	0.00337513	0.0143095	[BAI3, CELSR1, CELSR2, CPE, ELTD1, EMR1, GAL, GLRB, GPR110, GPR115, GPR124, GPR126, GPR98, LPHN2, LPHN3, NMU, NXPH3, PCSK1N, PENK, PKD1, SORCS1, SORCS2, SSTR1, TAC1]	[AGRP, BAI1, BAI2, BAI3, CARTPT, CD97, CELSR1, CELSR2, CELSR3, CPE, ECEL1, ELTD1, EMR1, EMR2, EMR4P, GAL, GALP, GALR1, GALR3, GLRA1, GLRA2, GLRB, GPR110, GPR111, GPR112, GPR113, GPR114, GPR115, GPR116, GPR124, GPR125, GPR126, GPR128, GPR133, GPR144, GPR56, GPR64, GPR97, GPR98, GRP, HCRT, HCRTR1, HCRTR2, LPHN1, LPHN2, LPHN3, NMB, NMS, NMU, NMUR1, NMUR2, NPB, NPFF, NPS, NPVF, NPW, NPY, NXPH2, NXPH3…	[CELSR1, CELSR2, EMR1, GAL, GPR110, GPR115, GPR126, GPR98, NMU, PCSK1N, TAC1]	[BAI3, CPE, ELTD1, GLRB, GPR124, LPHN2, LPHN3, NXPH3, PENK, PKD1, SORCS1, SORCS2, SSTR1]	45.8333	54.1667	Common
GO:0030005	GO_BiologicalProcess_16.11.2010_17h17	cellular di-, tri-valent inorganic cation homeostasis	54	23.3766	0.0033743	0.0144251	[AGTR1, ATP1A2, ATP7B, BCL2, BDKRB1, BDKRB2, CACNA1C, CCL11, CCL2, CCRL1, CD24, CNOT6, CP, CXCL12, CXCL13, EDN2, EDNRA, EPHX2, FXYD1, GNA15, GRIK5, IL1B, ITPR1, ITPR3, JPH2, KCNA5, KCNK3, LCN2, LPAR2, LPAR3, MFI2, P2RY2, PGM5, PKD2, PLN, PYGM, RGN, RIC3, RYR2, RYR3, S1PR3, SAA1, SCARA5, SCO2, SLC22A17, SLC24A3, SLC39A4, SLC8A1, SYPL2, TAC1, TFRC, TGM2, TRPC1, TRPV4]	[ABCB6, ABCB7, ADM, ADRA1A, AGTR1, ALAS2, ANXA7, APOE, APP, ATOX1, ATP1A2, ATP2A1, ATP2A2, ATP2C1, ATP7A, ATP7B, AVP, AVPR1A, AVPR1B, BCL2, BDKRB1, BDKRB2, C3AR1, C5AR1, CACNA1A, CACNA1C, CACNA1F, CACNA1G, CACNB4, CALCA, CALCB, CALCR, CALR, CASR, CAV1, CAV3, CBARA1, CCBP2, CCKAR, CCKBR, CCL1, CCL11, CCL13, CCL14, CCL15, CCL19, CCL2, CCL23, CCL3, CCL5, CCL7, CCR1, CCR2, CCR3, CCR5, CCR6, CCR7, CCR…	[ATP7B, CD24, CNOT6, CP, CXCL13, EDN2, GNA15, ITPR3, LCN2, LPAR2, LPAR3, MFI2, P2RY2, SAA1, SCO2, SLC39A4, TAC1, TFRC, TRPV4]	[AGTR1, ATP1A2, BCL2, BDKRB1, BDKRB2, CACNA1C, CCL11, CCL2, CCRL1, CXCL12, EDNRA, EPHX2, FXYD1, GRIK5, IL1B, ITPR1, JPH2, KCNA5, KCNK3, PGM5, PKD2, PLN, PYGM, RGN, RIC3, RYR2, RYR3, S1PR3, SCARA5, SLC22A17, SLC24A3, SLC8A1, SYPL2, TGM2, TRPC1]	35.1852	64.8148	Common
GO:0071900	GO_BiologicalProcess_16.11.2010_17h17	regulation of protein serine/threonine kinase activity	54	23.3766	0.0033743	0.0144251	[ADORA2B, ADRA2A, BMP4, C5, CASP3, CBLC, CCND1, CCND2, CCNE2, CD24, CDC25C, CDC6, CDK5R1, CDK7, CDKN2B, CDKN3, CHEK1, CKS1B, CKS2, DUSP16, DUSP3, DUSP8, DUSP9, ERBB2, FGF13, GHR, IL1B, ILK, IRAK1, ITGA1, KAT2B, KITLG, LATS2, LPAR2, LPAR3, MAP3K5, MAP3K6, MDFI, PKMYT1, PKN1, S100A9, SERTAD1, SFN, SFRP2, SPRY4, TGFA, TGFB3, THBS1, TP73, TPD52L1, TRIB3, TSC2, ZAK, ZEB2]	[ADAM17, ADORA2B, ADRA2A, ADRA2B, ADRA2C, AIDA, AKT1, ANAPC2, APC, APOE, AXIN1, BCCIP, BIRC7, BLM, BMP4, BMP7, C13orf15, C1QTNF2, C5, C5AR1, CARD10, CARD14, CASP3, CAV1, CAV3, CBLC, CCND1, CCND2, CCND3, CCNE2, CCNG1, CCNK, CCNT1, CCNT2, CCNY, CD24, CD74, CD81, CDC25A, CDC25C, CDC37, CDC6, CDK5R1, CDK5R2, CDK5RAP1, CDK5RAP3, CDK7, CDKN1B, CDKN1C, CDKN2A, CDKN2B, CDKN2C, CDKN2D, CDKN3, CHEK1, CHRFA…	[ADORA2B, CASP3, CBLC, CCND1, CCNE2, CD24, CDC25C, CDC6, CDK5R1, CDK7, CDKN3, CHEK1, CKS1B, CKS2, DUSP9, ERBB2, IRAK1, LPAR2, LPAR3, MAP3K5, MDFI, PKMYT1, S100A9, SFN, SPRY4, TGFA, TP73, TRIB3]	[ADRA2A, BMP4, C5, CCND2, CDKN2B, DUSP16, DUSP3, DUSP8, FGF13, GHR, IL1B, ILK, ITGA1, KAT2B, KITLG, LATS2, MAP3K6, PKN1, SERTAD1, SFRP2, TGFB3, THBS1, TPD52L1, TSC2, ZAK, ZEB2]	51.8519	48.1481	Common
GO:0055074	GO_BiologicalProcess_16.11.2010_17h17	calcium ion homeostasis	47	23.9796	0.00356466	0.0149891	[AGTR1, ATP1A2, ATP7B, BCL2, BDKRB1, BDKRB2, CACNA1C, CCL11, CCL2, CCRL1, CD24, CNOT6, CXCL12, CXCL13, EDN2, EDNRA, EPHX2, FXYD1, GNA15, GRIK5, IL1B, ITPR1, ITPR3, JPH2, KCNA5, KCNK3, LPAR2, LPAR3, P2RY2, PGM5, PKD2, PLN, PYGM, RGN, RIC3, RYR2, RYR3, S1PR3, SAA1, SLC24A3, SLC8A1, SYPL2, TAC1, TGM2, TRIM24, TRPC1, TRPV4]	[ADM, ADRA1A, AGTR1, ANXA7, APOE, APP, ATP1A2, ATP2A1, ATP2A2, ATP2C1, ATP7B, AVP, AVPR1A, AVPR1B, BCL2, BDKRB1, BDKRB2, C3AR1, C5AR1, CACNA1A, CACNA1C, CACNA1F, CACNA1G, CACNB4, CALCA, CALCB, CALCR, CALR, CASR, CAV1, CAV3, CBARA1, CCBP2, CCDC47, CCKAR, CCKBR, CCL1, CCL11, CCL13, CCL14, CCL15, CCL19, CCL2, CCL23, CCL3, CCL5, CCL7, CCR1, CCR2, CCR3, CCR5, CCR6, CCR7, CCR8, CCRL1, CD24, CD38, CD52,…	[ATP7B, CD24, CNOT6, CXCL13, EDN2, GNA15, ITPR3, LPAR2, LPAR3, P2RY2, SAA1, TAC1, TRIM24, TRPV4]	[AGTR1, ATP1A2, BCL2, BDKRB1, BDKRB2, CACNA1C, CCL11, CCL2, CCRL1, CXCL12, EDNRA, EPHX2, FXYD1, GRIK5, IL1B, ITPR1, JPH2, KCNA5, KCNK3, PGM5, PKD2, PLN, PYGM, RGN, RIC3, RYR2, RYR3, S1PR3, SLC24A3, SLC8A1, SYPL2, TGM2, TRPC1]	29.7872	70.2128	Specific for Cluster 2
GO:0008361	GO_BiologicalProcess_16.11.2010_17h17	regulation of cell size	55	23.2067	0.00366993	0.0153063	[ACVRL1, ALOX12, APBB1, BCL2, BDKRB1, CFH, CRYAB, DAB2, DCLK1, DCUN1D3, EI24, EMP3, ENO1, ENPP1, FGF13, FGFR1, ILK, INHBA, LMNB2, MAP1B, MAPT, NDN, NDRG4, NOTCH2, NPM1, NPR1, NTN1, NTRK3, NUPR1, OSGIN1, RBBP7, RERG, RRAD, RTN4, SCGB3A1, SEMA3F, SFN, SFRP2, SLC9A1, SLIT2, SLIT3, SMAD3, SOX17, SPP1, TGFB3, TGFBR1, TGFBR3, TNFRSF12A, TNK1, TP53, TP63, TP73, TSC2, TSPYL2, WFDC1]	[ACTA1, ACVR1B, ACVRL1, ADAM10, ADAM17, ADIPOR1, ADIPOR2, ADNP, ADNP2, ADRA1B, AGTR2, AGXT, AKT1, AKT1S1, ALOX12, AMOT, ANAPC2, APBB1, APBB2, APP, AREG, ARHGAP5, ARIH2, ATP6V0E1, ATP6V0E2, AVP, AVPR1A, BCL2, BCL6, BDKRB1, BIN3, BMP10, BMPR2, BTG1, C11orf59, C6orf108, CACNA1A, CAPRIN2, CAV3, CCDC85B, CCNG1, CD38, CDA, CDH4, CDK4, CDKN1B, CDKN2A, CDKN2AIP, CDKN2C, CDKN2D, CFH, CGRRF1, CLN8, CNTF, C…	[ALOX12, EI24, ENO1, INHBA, LMNB2, NDRG4, NPM1, SEMA3F, SFN, SLC9A1, SMAD3, SPP1, TNK1, TP53, TP63, TP73]	[ACVRL1, APBB1, BCL2, BDKRB1, CFH, CRYAB, DAB2, DCLK1, DCUN1D3, EMP3, ENPP1, FGF13, FGFR1, ILK, MAP1B, MAPT, NDN, NOTCH2, NPR1, NTN1, NTRK3, NUPR1, OSGIN1, RBBP7, RERG, RRAD, RTN4, SCGB3A1, SFRP2, SLIT2, SLIT3, SOX17, TGFB3, TGFBR1, TGFBR3, TNFRSF12A, TSC2, TSPYL2, WFDC1]	29.0909	70.9091	Specific for Cluster 2
GO:0045860	GO_BiologicalProcess_16.11.2010_17h17	positive regulation of protein kinase activity	55	23.2067	0.00366993	0.0153063	[ADCY5, ADORA2B, ADRA2A, ANG, ANGPT1, BDKRB1, BMP4, C5, CCND1, CCND2, CD24, CENPE, CERK, DGKA, DGKB, DGKZ, EDN2, EDNRA, ERBB2, EREG, FGF13, GADD45B, GADD45G, GHR, HSPA5, IL1B, ILK, IRAK1, ITGA1, KITLG, LPAR2, LPAR3, LRRK2, MAP3K5, MAP3K6, MDFI, MS4A1, NPM1, PKN1, PRKACB, PRKAG2, PRKAR2B, PRKCZ, S100A9, SPHK2, TGFA, TGFB3, TGFBR1, THBS1, TPD52L1, TPX2, TRAF4, VLDLR, ZAK, ZEB2]	[ACVR2B, ADAM17, ADAM9, ADCY1, ADCY2, ADCY4, ADCY5, ADCY6, ADCY7, ADCY8, ADNP, ADORA1, ADORA2A, ADORA2B, ADRA2A, ADRA2B, ADRA2C, ADRB2, AGK, AKT1, ALS2, ANG, ANGPT1, AXIN1, AZU1, BDKRB1, BIRC7, BMP4, C1QTNF2, C5, C5AR1, CALCA, CARD10, CARD14, CARTPT, CCDC88A, CCK, CCND1, CCND2, CCND3, CCNY, CD24, CD4, CD74, CD81, CDK5, CENPE, CERK, CERKL, CHRFAM7A, CHRM1, CHRNA3, CLSPN, CSF1, CXCR4, DAB1, DAXX, D…	[ADORA2B, CCND1, CD24, CENPE, DGKA, DGKZ, EDN2, ERBB2, EREG, HSPA5, IRAK1, LPAR2, LPAR3, MAP3K5, MDFI, NPM1, PRKCZ, S100A9, SPHK2, TGFA, TPX2, TRAF4]	[ADCY5, ADRA2A, ANG, ANGPT1, BDKRB1, BMP4, C5, CCND2, CERK, DGKB, EDNRA, FGF13, GADD45B, GADD45G, GHR, IL1B, ILK, ITGA1, KITLG, LRRK2, MAP3K6, MS4A1, PKN1, PRKACB, PRKAG2, PRKAR2B, TGFB3, TGFBR1, THBS1, TPD52L1, VLDLR, ZAK, ZEB2]	40	60	Common
GO:0008584	GO_BiologicalProcess_16.11.2010_17h17	male gonad development	19	30.6452	0.00371444	0.015367	[BCL2, BCL2L11, BIK, CCND1, ESR1, FANCA, FGF9, GATA6, INHBA, JAG2, KITLG, MGST1, MSH2, PATZ1, RBP4, SDC1, SGPL1, TFAP2C, WNT2B]	[ACVR2A, ANKRD7, AREG, BCL2, BCL2L1, BCL2L11, BIK, CCND1, CSDA, CSDE1, DHH, DMRT1, DMRT2, ESR1, FANCA, FGF9, FNDC3A, FSHB, FSHR, GATA4, GATA6, HMGB2, HSD17B10, INHA, INHBA, JAG2, KIT, KITLG, KLHL10, LHB, LHCGR, LHX9, MAMLD1, MAS1, MEA1, MGST1, MSH2, NCOA4, NKX2-1, NR0B1, NR5A1, PATZ1, PDGFRA, PLEKHA1, PRKACG, RBMY1B, RBP4, REN, RXFP2, SDC1, SGPL1, SOX15, SOX8, SOX9, SRD5A2, TFAP2C, UTF1, WNT2B, W…	[BCL2L11, BIK, CCND1, FANCA, INHBA, JAG2, MGST1, MSH2, PATZ1, SDC1, SGPL1, TFAP2C]	[BCL2, ESR1, FGF9, GATA6, KITLG, RBP4, WNT2B]	63.1579	36.8421	Common
GO:0000226	GO_BiologicalProcess_16.11.2010_17h17	microtubule cytoskeleton organization	35	25.5474	0.00380488	0.0156152	[AURKA, BBS4, BUB1B, CENPA, CKS2, CRYAB, ESPL1, FBXO5, GABARAP, HOOK1, KIAA1543, KIF11, KIF18A, KIF23, KIF2A, KIF2C, MAP1B, MAP7, MAPT, MLH1, NDC80, NEK2, NPM1, NUSAP1, PPP4C, PRC1, PRKCZ, SAC3D1, SGOL1, SPAG5, STMN1, TACC3, TEKT1, TTK, ZWINT]	[AURKA, AXIN1, BBS2, BBS4, BLOC1S2, BRCA2, BUB1B, BUB3, C16orf63, C19orf20, CASC5, CCDC105, CCDC99, CDK5RAP2, CENPA, CENPJ, CEP110, CEP120, CEP135, CEP192, CEP250, CEP63, CEP68, CEP72, CETN2, CETN3, CKAP5, CKS2, CLASP1, CLASP2, CNTROB, CROCC, CRYAB, CTNNB1, DAG1, DCTN2, DISC1, DOCK7, DYNC1H1, DYNLT1, ESPL1, FBXO5, FGFR1OP, FMN2, GABARAP, GADD45A, GCC2, HDAC3, HOOK1, HOOK3, KATNA1, KIAA1543, KIF11…	[AURKA, BUB1B, CENPA, CKS2, ESPL1, FBXO5, HOOK1, KIAA1543, KIF11, KIF18A, KIF23, KIF2A, KIF2C, MAP7, NDC80, NEK2, NPM1, NUSAP1, PPP4C, PRC1, PRKCZ, SAC3D1, SGOL1, SPAG5, STMN1, TACC3, TEKT1, TTK, ZWINT]	[BBS4, CRYAB, GABARAP, MAP1B, MAPT, MLH1]	82.8571	17.1429	Specific for Cluster 1
GO:0009967	GO_BiologicalProcess_16.11.2010_17h17	positive regulation of signal transduction	66	22.3729	0.00400042	0.0159087	[ADIPOQ, AKAP12, ANGPT1, ANTXR1, ARRB1, ARRB2, ATM, BMP4, C18orf32, CARD11, CD36, ECM1, ECT2, EDA2R, ERBB2, ERBB3, FADD, FAM110A, FGF13, FGF9, FGFR1, FLNA, FZD7, GHR, GPR177, HRAS, IGF1, IKBKE, IL1B, ILK, ITPKB, KITLG, KL, LMCD1, LPAR2, LPAR3, LTBR, MAD2L1, MAPK8IP2, NCAM1, NOTCH2, PRKCB, RHEB, RRAGD, S100A7, S100A9, S100B, SDCBP, SLC20A1, SLC35B2, SORBS3, SOX2, TERF2IP, TGFBR1, TGM2, THBS1, TNFS…	[ABRA, ADA, ADAMTS20, ADIPOQ, ADRA1A, ADRB2, ADRB3, AGXT, AKAP12, AKAP5, AKT2, ALS2, ANGPT1, ANTXR1, APOL3, AREG, ARRB1, ARRB2, ATM, ATP2C1, AXIN1, BCL10, BIRC2, BMP4, BMPER, BRAF, BST2, C11orf59, C18orf32, CANT1, CARD11, CARD9, CASP1, CASP10, CASP8, CAT, CAV1, CC2D1A, CD27, CD36, CD3E, CD4, CD40, CD44, CD74, CD80, CD8A, CDH13, CDKN2A, CDKN2AIP, CFLAR, CHUK, CLCF1, CNTF, CSF1, CSF2, CTNNB1, CXXC5…	[CARD11, ECT2, ERBB2, ERBB3, FADD, FAM110A, HRAS, IKBKE, LPAR2, LPAR3, LTBR, MAD2L1, MAPK8IP2, S100A7, S100A9, SLC20A1, SLC35B2, SOX2, TNFSF10, TRAF4, TSPAN6, UBD, VEGFA, ZDHHC13]	[ADIPOQ, AKAP12, ANGPT1, ANTXR1, ARRB1, ARRB2, ATM, BMP4, C18orf32, CD36, ECM1, EDA2R, FGF13, FGF9, FGFR1, FLNA, FZD7, GHR, GPR177, IGF1, IL1B, ILK, ITPKB, KITLG, KL, LMCD1, NCAM1, NOTCH2, PRKCB, RHEB, RRAGD, S100B, SDCBP, SORBS3, TERF2IP, TGFBR1, TGM2, THBS1, TPD52L1, TRAF5, VEGFB, ZDHHC17]	36.3636	63.6364	Common
GO:0003205	GO_BiologicalProcess_16.11.2010_17h17	cardiac chamber development	15	33.3333	0.00394292	0.0159269	[ADAMTS1, BMP4, CPE, FHL2, GATA6, HAND1, HOXA13, LY6E, RBP4, SFRP2, SMAD7, TBX5, TGFBR3, TNNT2, TPM1]	[ADAMTS1, BMP10, BMP4, CPE, CRELD1, EGLN1, FGFRL1, FHL2, FKBP1A, FOXC1, FOXC2, FRS2, GAA, GATA4, GATA6, HAND1, HOXA13, IFT88, LY6E, MESP1, MYBPC3, MYH6, MYH7, MYL2, MYL3, NKX2-5, NPY2R, NPY5R, OVOL2, PROX1, PTCD2, RBM15, RBP4, RXRA, SALL1, SEMA3C, SFRP2, SMAD7, TBX5, TGFBR3, TNNI3, TNNT2, TPM1, WNT11, WNT2]	[LY6E]	[ADAMTS1, BMP4, CPE, FHL2, GATA6, HAND1, HOXA13, RBP4, SFRP2, SMAD7, TBX5, TGFBR3, TNNT2, TPM1]	6.66667	93.3333	Specific for Cluster 2
GO:0010552	GO_BiologicalProcess_16.11.2010_17h17	positive regulation of gene-specific transcription from RNA polymerase II promoter	31	26.2712	0.00398653	0.0159773	[ARRB1, BMP4, FGF13, FOXA1, FOXA2, FOXF1, FOXF2, GATA6, HAND1, HDAC4, HHEX, HOXA13, IGF1, IHH, IKZF2, IL1B, MEF2C, NFIC, NFIX, POU5F1, PRKDC, SMAD3, SOX18, SRF, TBX5, TFEB, TLR2, TP53, TP63, TP73, WNT10A]	[AREG, ARRB1, BCL9L, BMP2, BMP4, BRCA1, C21orf33, CEBPA, CITED2, CREB1, CTNNB1, ENG, ETS1, FGF1, FGF10, FGF13, FGF4, FOXA1, FOXA2, FOXF1, FOXF2, FOXI1, FOXM1, FOXP3, GABPA, GABPAP, GABPB1, GATA2, GATA6, GDNF, GLI3, GTF2A2, HAND1, HDAC1, HDAC2, HDAC4, HDAC5, HES3, HES5, HHEX, HMGB2, HNF1B, HNF4A, HOXA13, IGF1, IHH, IKZF2, IL1B, IL26, IRF4, LEF1, LIF, MAP3K1, MC1R, MEF2C, MESP1, MLL4, MLXIPL, MSX1,…	[FOXA1, FOXA2, IHH, IKZF2, POU5F1, PRKDC, SMAD3, TLR2, TP53, TP63, TP73, WNT10A]	[ARRB1, BMP4, FGF13, FOXF1, FOXF2, GATA6, HAND1, HDAC4, HHEX, HOXA13, IGF1, IL1B, MEF2C, NFIC, NFIX, SOX18, SRF, TBX5, TFEB]	38.7097	61.2903	Common
GO:0010628	GO_BiologicalProcess_16.11.2010_17h17	positive regulation of gene expression	132	20.2765	0.00393739	0.0160308	[ACVR1, ACVRL1, AGRN, ALDH1A2, ALOX12, ARNT2, ARRB1, ATF7IP, ATXN1, ATXN7L3, BARX2, BCL11B, BMP3, BMP4, BMP6, CAMKK2, CCNA2, CCNE1, CDC2, CDK7, CREB3L4, CREB5, CTGF, DAB2, DDIT3, E2F1, EBF1, EBF3, EGR2, EHF, ESR1, ESRRA, FGF13, FGF9, FHL2, FOXA1, FOXA2, FOXF1, FOXF2, FOXJ2, FSTL3, FZD1, FZD4, FZD7, GATA6, GLI2, GLIS2, GRHL3, HAND1, HAND2, HDAC4, HHEX, HMGA1, HOXA13, IGF1, IHH, IKZF2, IL1B, ILK, I…	[AATF, ABLIM3, ABRA, ACVR1, ACVR1B, ACVRL1, ADRB2, AFAP1L2, AGRN, AHR, AKIRIN2, AKT2, ALDH1A2, ALOX12, ALX1, ALX4, ANKRD49, APP, AREG, ARHGEF11, ARID1A, ARID1B, ARNT, ARNT2, ARNTL, ARRB1, ASCL1, ASF1A, ATF1, ATF4, ATF6, ATF7IP, ATOH1, ATXN1, ATXN7L3, AVP, AVPR2, AXIN1, BAMBI, BARX2, BAZ1B, BCL10, BCL11B, BCL3, BCL9L, BLM, BLOC1S2, BMP10, BMP15, BMP2, BMP3, BMP4, BMP6, BMP7, BPTF, BRCA1, BRPF1, BS…	[AGRN, ALOX12, ATF7IP, ATXN7L3, BARX2, BCL11B, BMP3, CCNA2, CCNE1, CDC2, CDK7, CREB3L4, E2F1, EHF, ESRRA, FOXA1, FOXA2, GRHL3, HMGA1, IHH, IKZF2, INHBA, IRAK1, IRF6, KLF5, ONECUT2, PAX8, PAX9, PCBD1, POU2F1, POU3F1, POU5F1, PRKDC, PUS1, SEC14L2, SIX1, SIX2, SIX4, SMAD3, SMARCD1, SOX2, SOX4, TAF8, TLR2, TP53, TP63, TP73, VEGFA, WNT10A, WWTR1, ZBTB7B]	[ACVR1, ACVRL1, ALDH1A2, ARNT2, ARRB1, ATXN1, BMP4, BMP6, CAMKK2, CREB5, CTGF, DAB2, DDIT3, EBF1, EBF3, EGR2, ESR1, FGF13, FGF9, FHL2, FOXF1, FOXF2, FOXJ2, FSTL3, FZD1, FZD4, FZD7, GATA6, GLI2, GLIS2, HAND1, HAND2, HDAC4, HHEX, HOXA13, IGF1, IL1B, ILK, JUN, KAT2B, KLF15, LPIN2, MEF2C, MEIS2, MEOX1, MITF, NFIC, NFIX, NOTCH4, NR4A1, NR4A3, NTF3, OSR2, PBX1, PGR, PLAGL1, PPARGC1A, RASL11A, RBPJ, ROR…	38.6364	61.3636	Common
GO:0006917	GO_BiologicalProcess_16.11.2010_17h17	induction of apoptosis	70	22.082	0.00433766	0.0171171	[ABL1, AEN, ARHGEF16, ARHGEF9, ATM, BAK1, BCL2L11, BID, BIK, BNIP3, CASP2, CASP3, CD24, CD70, CIDEA, COL4A3, CRH, DAPK3, DEDD2, ECT2, EI24, FADD, HTATIP2, IFI27, IKBKE, INHBA, MAP3K5, MLH1, MSH2, NACC1, NGEF, NGFRAP1, NOTCH2, NR4A1, NUPR1, OBSCN, PDCD6, PERP, PLAGL1, PMAIP1, PRODH, PRUNE2, PYCARD, RYR2, SFN, SH3RF1, SMAD3, SMPD2, SQSTM1, STAT1, TBX5, TFPT, TGFB3, TGFBR1, TGM2, THBS1, TIAM2, TLR2,…	[AATF, ABL1, ABR, ACVR1B, ADORA1, ADORA2A, AEN, AIFM1, AIFM2, AIFM3, AKAP13, ALOX15B, APH1A, APH1B, APOE, APP, ARHGAP4, ARHGEF11, ARHGEF12, ARHGEF16, ARHGEF17, ARHGEF18, ARHGEF2, ARHGEF3, ARHGEF4, ARHGEF6, ARHGEF7, ARHGEF9, ATM, BAD, BAK1, BAX, BBC3, BCL10, BCL2L11, BCL2L13, BCL3, BCLAF1, BID, BIK, BNIP1, BNIP3, BNIP3L, BNIPL, BOK, BRCA1, BRCA2, BTK, C16orf5, C6, C9, CADM1, CASP1, CASP10, CASP2, …	[ARHGEF16, BAK1, BCL2L11, BID, BIK, CASP2, CASP3, CD24, CD70, CRH, DEDD2, ECT2, EI24, FADD, HTATIP2, IFI27, IKBKE, INHBA, MAP3K5, MSH2, NACC1, NGEF, NGFRAP1, OBSCN, PDCD6, PERP, PMAIP1, PRODH, PYCARD, SFN, SH3RF1, SMAD3, SMPD2, STAT1, TFPT, TLR2, TNFRSF25, TNFSF10, TP53, TP53I3, TP63, TP73, TRAF3, TUBB2C, UNC13D, VAV2, VAV3]	[ABL1, AEN, ARHGEF9, ATM, BNIP3, CIDEA, COL4A3, DAPK3, MLH1, NOTCH2, NR4A1, NUPR1, PLAGL1, PRUNE2, RYR2, SQSTM1, TBX5, TGFB3, TGFBR1, TGM2, THBS1, TIAM2, TPD52L1]	67.1429	32.8571	Specific for Cluster 1
GO:0006875	GO_BiologicalProcess_16.11.2010_17h17	cellular metal ion homeostasis	47	23.7374	0.00438437	0.0171693	[AGTR1, ATP1A2, ATP7B, BCL2, BDKRB1, BDKRB2, C7, CACNA1C, CCL11, CCL2, CCRL1, CD24, CNOT6, CXCL12, CXCL13, EDN2, EDNRA, EPHX2, FXYD1, GNA15, GRIK5, IL1B, ITPR1, ITPR3, JPH2, KCNA5, KCNK3, LPAR2, LPAR3, P2RY2, PGM5, PKD2, PLN, PYGM, RGN, RIC3, RYR2, RYR3, S1PR3, SAA1, SLC24A3, SLC8A1, SYPL2, TAC1, TGM2, TRPC1, TRPV4]	[ADM, ADRA1A, AGTR1, AGXT, ANXA7, APOE, APP, ASNA1, ATP1A2, ATP2A1, ATP2A2, ATP2C1, ATP7B, AVP, AVPR1A, AVPR1B, BCL2, BDKRB1, BDKRB2, C3AR1, C5AR1, C7, CACNA1A, CACNA1C, CACNA1F, CACNA1G, CACNB4, CALCA, CALCB, CALCR, CALR, CASR, CAV1, CAV3, CBARA1, CCBP2, CCKAR, CCKBR, CCL1, CCL11, CCL13, CCL14, CCL15, CCL19, CCL2, CCL23, CCL3, CCL5, CCL7, CCR1, CCR2, CCR3, CCR5, CCR6, CCR7, CCR8, CCRL1, CD24, CD…	[ATP7B, CD24, CNOT6, CXCL13, EDN2, GNA15, ITPR3, LPAR2, LPAR3, P2RY2, SAA1, TAC1, TRPV4]	[AGTR1, ATP1A2, BCL2, BDKRB1, BDKRB2, C7, CACNA1C, CCL11, CCL2, CCRL1, CXCL12, EDNRA, EPHX2, FXYD1, GRIK5, IL1B, ITPR1, JPH2, KCNA5, KCNK3, PGM5, PKD2, PLN, PYGM, RGN, RIC3, RYR2, RYR3, S1PR3, SLC24A3, SLC8A1, SYPL2, TGM2, TRPC1]	27.6596	72.3404	Specific for Cluster 2
GO:0045786	GO_BiologicalProcess_16.11.2010_17h17	negative regulation of cell cycle	43	24.1573	0.00447128	0.017377	[APBB1, ATM, BCL2, BMP4, BUB1, CASP3, CDKN2B, CDKN3, CENPE, CENPF, COMMD5, CREB3L4, DCUN1D3, DDIT3, DGKZ, DHCR24, GAS1, GAS2, GAS7, GMNN, HRAS, ILK, INHBA, IRF6, KAT2B, LATS2, MSH2, NOTCH2, PKD1, PKD2, PLAGL1, PPM1G, PPP1R15A, RBM38, SMAD3, SOX2, THBS1, TP53, TP63, TP73, TSPYL2, TTK, ZAK]	[ADCYAP1, AIF1, ALOX15B, APBB1, APBB2, APC, ARTN, ATM, AURKAIP1, BARD1, BCL2, BCL6, BMP2, BMP4, BMP7, BTG3, BTG4, BUB1, CALR, CASP3, CDC123, CDK5, CDK5RAP1, CDK6, CDKN1B, CDKN1C, CDKN2A, CDKN2B, CDKN2C, CDKN2D, CDKN3, CENPE, CENPF, CGREF1, CGRRF1, CHMP1A, COMMD5, CREB3L4, CUL1, CUL2, CUL3, CUL4A, CUL5, CYP27B1, DCUN1D3, DDIT3, DGKZ, DHCR24, DLGAP5, DST, EGFR, EIF4G2, ERN1, ERN2, ETS1, FAM5B, FAM5…	[BUB1, CASP3, CDKN3, CENPE, CENPF, COMMD5, CREB3L4, DGKZ, DHCR24, GAS2, GMNN, HRAS, INHBA, IRF6, MSH2, PPM1G, SMAD3, SOX2, TP53, TP63, TP73, TTK]	[APBB1, ATM, BCL2, BMP4, CDKN2B, DCUN1D3, DDIT3, GAS1, GAS7, ILK, KAT2B, LATS2, NOTCH2, PKD1, PKD2, PLAGL1, PPP1R15A, RBM38, THBS1, TSPYL2, ZAK]	51.1628	48.8372	Common
GO:0006937	GO_BiologicalProcess_16.11.2010_17h17	regulation of muscle contraction	21	29.1667	0.00452441	0.0174513	[ADORA2B, ANXA6, ATP1A2, CHRM3, CNN1, CTGF, DMPK, EDN2, HDAC4, ITGA2, MYL9, NMU, P2RX1, PPP1R12B, PTGS1, RYR2, SMAD7, SRF, TNNT1, TNNT3, TPM1]	[ADA, ADORA2B, ADRA1A, ADRA2B, ADRB2, ADRBK1, ANXA6, ARG2, ATP1A2, ATP1A4, ATP2A1, CALCRL, CAV1, CAV3, CHRM2, CHRM3, CHRNA3, CHRNB4, CNN1, CTGF, DMPK, EDN1, EDN2, F2R, FKBP1B, FLT1, GHSR, HDAC4, ITGA2, KCNB2, MAP2K1, MYBPC3, MYBPH, MYL2, MYL3, MYL5, MYL9, MYLK2, MYOCD, NCF1B, NKX2-5, NMS, NMU, NMUR2, NOS1, OXT, OXTR, P2RX1, P2RX4, PLCE1, PPP1R12B, PRKCA, PROK2, PTGS1, PTGS2, RYR2, SDC4, SMAD7, SO…	[ADORA2B, EDN2, ITGA2, NMU, TNNT1]	[ANXA6, ATP1A2, CHRM3, CNN1, CTGF, DMPK, HDAC4, MYL9, P2RX1, PPP1R12B, PTGS1, RYR2, SMAD7, SRF, TNNT3, TPM1]	23.8095	76.1905	Specific for Cluster 2
GO:0045596	GO_BiologicalProcess_16.11.2010_17h17	negative regulation of cell differentiation	57	22.8	0.00469731	0.017983	[ADIPOQ, ASCL2, ASPM, AXIN2, BDNF, BMP4, CCND1, CHRD, CSRP1, EFEMP1, ENPP1, EREG, FOXA2, FOXJ1, FSTL3, FZD7, GLI2, GPR98, HDAC4, IGF1, IHH, INHBA, ISL2, JUP, LDB2, NOTCH2, NOTCH4, NTN1, PBX1, POU5F1, PRAME, PRDM6, PTHLH, RTN4, SEMA3F, SFRP2, SIX2, SLIT3, SMAD3, SMAD7, SNAI1, SOX2, SPP1, STAT5B, TGFB1I1, TGFBR1, TP53, TP63, TRIB3, TWIST1, TWIST2, WWTR1, XYLT1, ZBTB16, ZEB1, ZFP36, ZNF358]	[ABCA1, ABCA5, ABCG1, ADIPOQ, APC, ARHGDIA, ARHGEF1, ARTN, ASCL1, ASCL2, ASPM, ATF5, AXIN1, AXIN2, BCL6, BDNF, BMP4, BMP7, BMPR1A, C10orf49, C14orf169, C1QC, C21orf33, CALCA, CALR, CARTPT, CAV1, CCDC85B, CCND1, CD74, CDK6, CDX2, CETP, CHRD, CITED1, CNTF, CNTN4, CREBBP, CSRP1, CTLA4, CTNNB1, DICER1, DLL1, DLL3, DLX1, DRD3, DTX1, DYNLT1, EFEMP1, ENPP1, EPHB2, EREG, F2, FGF10, FGF23, FGF4, FLT3, FOX…	[ASCL2, ASPM, CCND1, EREG, FOXA2, FOXJ1, GPR98, IHH, INHBA, ISL2, JUP, POU5F1, PRAME, PTHLH, SEMA3F, SIX2, SMAD3, SOX2, SPP1, TP53, TP63, TRIB3, TWIST2, WWTR1]	[ADIPOQ, AXIN2, BDNF, BMP4, CHRD, CSRP1, EFEMP1, ENPP1, FSTL3, FZD7, GLI2, HDAC4, IGF1, LDB2, NOTCH2, NOTCH4, NTN1, PBX1, PRDM6, RTN4, SFRP2, SLIT3, SMAD7, SNAI1, STAT5B, TGFB1I1, TGFBR1, TWIST1, XYLT1, ZBTB16, ZEB1, ZFP36, ZNF358]	42.1053	57.8947	Common
GO:0007417	GO_BiologicalProcess_16.11.2010_17h17	central nervous system development	97	20.9503	0.00484393	0.0184069	[ALDH1A2, AQP1, ARNT2, ASCL2, ASPM, ATM, AXIN2, BBS4, BCL11B, BCL2, BMP4, CDH1, CDK5R1, CELSR1, CHD7, CHRD, CKB, DCLK1, DPYSL2, DSCAML1, E2F1, ECE2, EFNA5, EGR2, EYA1, FAIM2, FGF13, FGFR1, FOXA2, FYN, GAS1, GDF10, GLI2, GNAO1, GNAQ, GNG12, GSN, GSTP1, HHEX, HOXB8, HOXC10, HSPA5, ID3, ISL2, JAG2, KCNK3, KLK6, LDB2, MAP1B, MAPT, MNX1, NDN, NES, NNAT, NOTCH4, NPTX1, NR2F1, NR3C1, NTF3, PAX7, PCDH18,…	[ABT1, ACCN1, ACSL3, ACVR1B, ADAM22, ADAM23, ADORA2A, AFF2, AGER, AGTR2, AGXT, AKAP5, ALDH1A2, ALDH1A3, ALDH3A2, ALDH5A1, ALX1, ANXA3, APAF1, APP, AQP1, ARF4, ARNT2, ARSA, ARSB, ARX, ASCL1, ASCL2, ASPM, ATM, ATN1, ATOH1, ATP6V0D1, ATP7A, ATRX, AVPR1A, AXIN1, AXIN2, B3GNT5, BARHL1, BBS2, BBS4, BCAN, BCL11B, BCL2, BCR, BMP2, BMP4, BMPR1A, BPTF, BRCA2, BTD, C11orf9, C1QB, C1orf187, C21orf33, C2CD3, …	[ASCL2, ASPM, BCL11B, CDH1, CDK5R1, CELSR1, CHD7, E2F1, ECE2, EFNA5, FOXA2, GSTP1, HOXB8, HOXC10, HSPA5, ISL2, JAG2, KLK6, MNX1, PAX7, PCSK1N, PITPNM1, POU3F1, PRKDC, PTPRZ1, SBK1, SHROOM2, SOX2, TACC3, TP53, TP73, ZIC2, ZNF488]	[ALDH1A2, AQP1, ARNT2, ATM, AXIN2, BBS4, BCL2, BMP4, CHRD, CKB, DCLK1, DPYSL2, DSCAML1, EGR2, EYA1, FAIM2, FGF13, FGFR1, FYN, GAS1, GDF10, GLI2, GNAO1, GNAQ, GNG12, GSN, HHEX, ID3, KCNK3, LDB2, MAP1B, MAPT, NDN, NES, NNAT, NOTCH4, NPTX1, NR2F1, NR3C1, NTF3, PCDH18, PCP4, PLP1, PNMA1, PRTFDC1, RAB23, RCAN1, RCAN2, RORA, RTN4, S100B, SH3GL2, SLIT2, SLIT3, SOX10, SRR, THRA, TIMP3, TIMP4, TSC2, WNT2B…	34.0206	65.9794	Common
GO:0046822	GO_BiologicalProcess_16.11.2010_17h17	regulation of nucleocytoplasmic transport	25	27.4725	0.00494518	0.0185173	[AXIN2, BMP4, CDC2, CDH1, FLNA, FZD7, GNAQ, IL1B, JUP, MDFI, MXI1, PKIA, PKIG, POU5F1, PPP1R12A, RBPMS, SLC25A23, SMAD3, TACC3, TGFB3, TGFBR1, THRA, TLR2, TXN, WWTR1]	[AAAS, AKAP1, AKAP5, AXIN1, AXIN2, BAMBI, BARD1, BCL3, BMP4, BMPR1A, CD27, CDC2, CDH1, CDK5, CDKN2A, CYLD, EDA, EGF, EGFR, EMD, EP300, FAF1, FLNA, FZD7, G3BP2, GLI3, GNAQ, GREM1, GSK3B, IL10, IL1B, JAK2, JUP, KHDRBS1, LACRT, MBTPS1, MDFI, MXI1, NCBP2, NEDD4, NF1, NFKBIA, NFKBIB, NFKBIE, NFKBIL1, NFKBIL2, NLRP12, NLRP3, NUDT4, OGG1, PKIA, PKIG, POU5F1, PPP1R12A, PRDX1, PRKCA, PRKCQ, PSMD10, PTPN11…	[CDC2, CDH1, JUP, MDFI, PKIA, POU5F1, SMAD3, TACC3, TLR2, TXN, WWTR1]	[AXIN2, BMP4, FLNA, FZD7, GNAQ, IL1B, MXI1, PKIG, PPP1R12A, RBPMS, SLC25A23, TGFB3, TGFBR1, THRA]	44	56	Common
GO:0050727	GO_BiologicalProcess_16.11.2010_17h17	regulation of inflammatory response	25	27.4725	0.00494518	0.0185173	[A2M, ADIPOQ, ADORA2B, AGTR1, CMA1, EDNRA, F12, GPX2, IL1B, INDO, ITGA2, MASP1, MGLL, PDE5A, PTGER3, SAA1, SCGB1A1, SELE, SERPINF1, SERPING1, STAT5B, TAC1, TGM2, TLR2, ZFP36]	[A2M, ACE2, ACP5, ADA, ADIPOQ, ADORA1, ADORA2A, ADORA2B, ADRB2, AGER, AGTR1, AGXT, AHSG, APOE, BCL6, C3, CALCRL, CCL5, CD276, CD47, CMA1, CX3CL1, EDNRA, F12, FABP4, FCER1A, FOXP3, GHRL, GHSR, GPX1, GPX2, GPX4, IL10, IL1B, IL2, IL20, IL2RA, IL33, IL6, IL6ST, INDO, INS, ITGA2, JAK2, KLKB1, LBP, LTA, MASP1, MGLL, MYD88, NDFIP1, NLRP12, NPY5R, NT5E, OSM, OSMR, PCDHA4, PCDHA6, PDE5A, PLA2G2A, PLA2G4A,…	[ADORA2B, F12, GPX2, INDO, ITGA2, SAA1, SCGB1A1, TAC1, TLR2]	[A2M, ADIPOQ, AGTR1, CMA1, EDNRA, IL1B, MASP1, MGLL, PDE5A, PTGER3, SELE, SERPINF1, SERPING1, STAT5B, TGM2, ZFP36]	36	64	Common
GO:0055001	GO_BiologicalProcess_16.11.2010_17h17	muscle cell development	18	30.5085	0.00492611	0.0185816	[ACTC1, AGRN, CACNB2, CCNB1, CDC2, ERBB2, FHL2, KRT19, MYH11, OBSL1, RCAN1, SDC1, SNTA1, TMOD1, TNNC1, TNNT2, TPM1, VEGFA]	[ACTA1, ACTC1, AFG3L2, AGRN, ALS2, APP, ATG5, AXIN1, BMP10, CACNA1S, CACNB2, CACNB4, CACNG2, CAV2, CAV3, CCNB1, CDC2, CHAT, CHRNA1, CHRNB1, CXADR, DICER1, DNAJA3, DNER, DVL1, ERBB2, F2R, FHL2, GPX1, HOMER1, KRT19, LMNA, MUSK, MYH11, MYH6, MYL2, MYOG, MYOZ1, NEURL2, NKX2-5, NKX2-6, NRD1, OBSL1, PPP3CA, PROX1, PTCD2, RCAN1, SDC1, SKI, SNTA1, TCAP, TMOD1, TNNC1, TNNT2, TPM1, TTN, VEGFA, WNT10B, XIRP…	[AGRN, CCNB1, CDC2, ERBB2, KRT19, SDC1, TNNC1, VEGFA]	[ACTC1, CACNB2, FHL2, MYH11, OBSL1, RCAN1, SNTA1, TMOD1, TNNT2, TPM1]	44.4444	55.5556	Common
GO:0055066	GO_BiologicalProcess_16.11.2010_17h17	di-, tri-valent inorganic cation homeostasis	56	22.7642	0.00521879	0.0194003	[AGTR1, ATP1A2, ATP7B, BCL2, BDKRB1, BDKRB2, CACNA1C, CCL11, CCL2, CCRL1, CD24, CNOT6, CP, CUTC, CXCL12, CXCL13, EDN2, EDNRA, EPHX2, FXYD1, GNA15, GRIK5, IL1B, ITPR1, ITPR3, JPH2, KCNA5, KCNK3, LCN2, LPAR2, LPAR3, MFI2, P2RY2, PGM5, PKD2, PLN, PYGM, RGN, RIC3, RYR2, RYR3, S1PR3, SAA1, SCARA5, SCO2, SLC22A17, SLC24A3, SLC39A4, SLC8A1, SYPL2, TAC1, TFRC, TGM2, TRIM24, TRPC1, TRPV4]	[ABCB6, ABCB7, ADM, ADRA1A, AGTR1, ALAS2, ANXA7, APOE, APP, ATOX1, ATP1A2, ATP2A1, ATP2A2, ATP2C1, ATP7A, ATP7B, AVP, AVPR1A, AVPR1B, BCL2, BDH2, BDKRB1, BDKRB2, C3AR1, C5AR1, CACNA1A, CACNA1C, CACNA1F, CACNA1G, CACNB4, CALCA, CALCB, CALCR, CALR, CASR, CAV1, CAV3, CBARA1, CCBP2, CCDC47, CCKAR, CCKBR, CCL1, CCL11, CCL13, CCL14, CCL15, CCL19, CCL2, CCL23, CCL3, CCL5, CCL7, CCR1, CCR2, CCR3, CCR5, C…	[ATP7B, CD24, CNOT6, CP, CXCL13, EDN2, GNA15, ITPR3, LCN2, LPAR2, LPAR3, MFI2, P2RY2, SAA1, SCO2, SLC39A4, TAC1, TFRC, TRIM24, TRPV4]	[AGTR1, ATP1A2, BCL2, BDKRB1, BDKRB2, CACNA1C, CCL11, CCL2, CCRL1, CUTC, CXCL12, EDNRA, EPHX2, FXYD1, GRIK5, IL1B, ITPR1, JPH2, KCNA5, KCNK3, PGM5, PKD2, PLN, PYGM, RGN, RIC3, RYR2, RYR3, S1PR3, SCARA5, SLC22A17, SLC24A3, SLC8A1, SYPL2, TGM2, TRPC1]	35.7143	64.2857	Common
GO:0043408	GO_BiologicalProcess_16.11.2010_17h17	regulation of MAPKKK cascade	42	24	0.0055554	0.0200699	[ANGPT1, ARRB1, ARRB2, BMP4, CD24, CD36, CNKSR3, DUSP3, EDA2R, ERBB2, FGF13, FGF9, FGFR1, FZD7, GRIK5, HRAS, ID1, IGF1, IL1B, ILK, KL, LPAR2, LPAR3, MAP3K5, MAP3K6, MAPK8IP2, MDFI, PKN1, S100A7, S100A9, SDCBP, SFRP2, SH3RF1, SORBS3, SOX2, TIMP2, TP73, TPD52L1, TRAF4, VEGFB, ZAK, ZEB2]	[ADRA1A, ADRB2, ADRB3, AGXT, AIDA, AKT1, AKT2, AMBP, ANGPT1, APC, AREG, ARRB1, ARRB2, ATP6AP2, AXIN1, BIRC7, BMP4, BMPER, BRAF, C11orf59, CARD9, CAV1, CAV3, CD24, CD27, CD36, CD44, CD74, CNKSR3, CNTF, CTNNB1, DAG1, DAXX, DBNL, DCC, DUSP3, DUSP6, DVL2, DVL3, EDA2R, EDN1, ERBB2, ERCC6, F2R, FCER1A, FGD4, FGF10, FGF13, FGF18, FGF19, FGF21, FGF23, FGF4, FGF9, FGFR1, FOXM1, FOXO1, FZD10, FZD7, GPR55, …	[CD24, ERBB2, HRAS, ID1, LPAR2, LPAR3, MAP3K5, MAPK8IP2, MDFI, S100A7, S100A9, SH3RF1, SOX2, TP73, TRAF4]	[ANGPT1, ARRB1, ARRB2, BMP4, CD36, CNKSR3, DUSP3, EDA2R, FGF13, FGF9, FGFR1, FZD7, GRIK5, IGF1, IL1B, ILK, KL, MAP3K6, PKN1, SDCBP, SFRP2, SORBS3, TIMP2, TPD52L1, VEGFB, ZAK, ZEB2]	35.7143	64.2857	Common
GO:0010604	GO_BiologicalProcess_16.11.2010_17h17	positive regulation of macromolecule metabolic process	193	19.3193	0.00544921	0.0201111	[ACVR1, ACVRL1, ADIPOQ, ADRA2A, AGRN, AGTR1, ALDH1A2, ALOX12, ANAPC10, ANGPT1, APEX1, ARNT2, ARRB1, ATF7IP, ATXN1, ATXN7L3, AXIN2, BARX2, BCL11B, BCL2, BMP3, BMP4, BMP6, BRCC3, BVES, C19orf10, CAMKK2, CARD11, CCNA2, CCNB1, CCND1, CCND2, CCNE1, CDC2, CDC20, CDK7, CREB3L4, CREB5, CTGF, DAB2, DDIT3, DNA2, E2F1, EBF1, EBF3, EDNRA, EGR2, EHF, EIF5A2, EREG, ESR1, ESRRA, EYA1, F12, FAM129A, FAM175A, FBX…	[AATF, ABLIM3, ABRA, ACVR1, ACVR1B, ACVRL1, ADAM17, ADAM9, ADIPOQ, ADNP, ADORA1, ADRA1B, ADRA2A, ADRB2, AFAP1L2, AGRN, AGTR1, AGXT, AHR, AIFM2, AKAP5, AKIRIN2, AKT1, AKT2, AKTIP, ALDH1A2, ALOX12, ALX1, ALX4, AMELX, ANAPC1, ANAPC10, ANAPC11, ANAPC2, ANAPC4, ANAPC5, ANAPC7, ANGPT1, ANGPT4, ANKRD49, ANXA3, APC, APEX1, APOE, APP, AREG, ARHGEF11, ARID1A, ARID1B, ARNT, ARNT2, ARNTL, ARRB1, ARTN, ASCL1,…	[AGRN, ALOX12, ANAPC10, APEX1, ATF7IP, ATXN7L3, BARX2, BCL11B, BMP3, BRCC3, C19orf10, CARD11, CCNA2, CCNB1, CCND1, CCNE1, CDC2, CDC20, CDK7, CREB3L4, DNA2, E2F1, EHF, EREG, ESRRA, F12, FBXO5, FOXA1, FOXA2, FURIN, GRHL3, HMGA1, HRAS, HSPA5, IHH, IKZF2, INHBA, IRAK1, IRF6, ITGA2, KLF5, MUC1, ONECUT2, PAX8, PAX9, PCBD1, PLK1, POU2F1, POU3F1, POU5F1, PRKDC, PSMA4, PSMA5, PSMB2, PSMB3, PSMD11, PSMD2, …	[ACVR1, ACVRL1, ADIPOQ, ADRA2A, AGTR1, ALDH1A2, ANGPT1, ARNT2, ARRB1, ATXN1, AXIN2, BCL2, BMP4, BMP6, BVES, CAMKK2, CCND2, CREB5, CTGF, DAB2, DDIT3, EBF1, EBF3, EDNRA, EGR2, EIF5A2, ESR1, EYA1, FAM129A, FAM175A, FGF13, FGF7, FGF9, FHL2, FOXF1, FOXF2, FOXJ2, FSTL3, FZD1, FZD4, FZD7, GATA6, GHR, GLI2, GLIS2, HAND1, HAND2, HDAC4, HHEX, HOXA13, IGF1, IL1B, ILK, ITGA5, JUN, KAT2B, KITLG, KLF15, LPIN2,…	41.9689	58.0311	Common
GO:0033157	GO_BiologicalProcess_16.11.2010_17h17	regulation of intracellular protein transport	24	27.5862	0.00549872	0.0201489	[AXIN2, BMP4, CDC2, CDH1, FLNA, FZD7, GNAQ, IL1B, JUP, MDFI, MXI1, PKIA, PKIG, POU5F1, RBPMS, SLC25A23, SMAD3, TACC3, TGFB3, TGFBR1, THRA, TLR2, TXN, WWTR1]	[AKAP1, AKAP5, AXIN1, AXIN2, BAMBI, BARD1, BCL3, BMP4, BMPR1A, CD27, CDC2, CDH1, CDK5, CDKN2A, CYLD, EDA, EGF, EGFR, EMD, EP300, FAF1, FLNA, FZD7, G3BP2, GCC2, GLI3, GNAQ, GOPC, GREM1, GSK3B, IL10, IL1B, JAK2, JUP, LACRT, MBTPS1, MDFI, MXI1, NF1, NFKBIA, NFKBIB, NFKBIE, NFKBIL1, NFKBIL2, NLRP12, NLRP3, OGG1, PKIA, PKIG, POU5F1, PRDX1, PRKCA, PRKCQ, PSMD10, PTPN11, RBPMS, RHOA, SFRP5, SHH, SIRT1, …	[CDC2, CDH1, JUP, MDFI, PKIA, POU5F1, SMAD3, TACC3, TLR2, TXN, WWTR1]	[AXIN2, BMP4, FLNA, FZD7, GNAQ, IL1B, MXI1, PKIG, RBPMS, SLC25A23, TGFB3, TGFBR1, THRA]	45.8333	54.1667	Common
GO:0043085	GO_BiologicalProcess_16.11.2010_17h17	positive regulation of catalytic activity	114	20.4301	0.00554866	0.0201877	[ABL1, ABL2, ADCY5, ADORA2B, ADRA2A, ADRB1, AGTR1, ALOX12, ANAPC10, ANG, ANGPT1, BCL2, BDKRB1, BMP4, C5, CCL11, CCNB1, CCND1, CCND2, CD24, CDC2, CDC20, CENPE, CERK, COL4A3, CTGF, DGKA, DGKB, DGKZ, EDN2, EDNRA, ERBB2, EREG, FBXO5, FGF13, FOXJ1, GADD45B, GADD45G, GHR, GNA15, GNAO1, GNAQ, GPIHBP1, HSPA5, HSPE1, IFI27, IL1B, ILK, IRAK1, ITGA1, ITGA2, KITLG, LPAR2, LPAR3, LRRK2, MAP3K5, MAP3K6, MDFI, …	[ABHD5, ABL1, ABL2, ACD, ACR, ACVR2B, ADAM17, ADAM9, ADCY1, ADCY2, ADCY4, ADCY5, ADCY6, ADCY7, ADCY8, ADCYAP1, ADCYAP1R1, ADNP, ADORA1, ADORA2A, ADORA2B, ADORA3, ADRA1A, ADRA2A, ADRA2B, ADRA2C, ADRB1, ADRB2, ADRB3, AGK, AGTR1, AGTR2, AGXT, AIFM1, AIFM3, AKT1, ALDOB, ALOX12, ALS2, ANAPC1, ANAPC10, ANAPC11, ANAPC2, ANAPC4, ANAPC5, ANAPC7, ANG, ANGPT1, APAF1, APH1A, APH1B, APOA1, APOA4, APOA5, APOC2…	[ADORA2B, ADRB1, ALOX12, ANAPC10, CCNB1, CCND1, CD24, CDC2, CDC20, CENPE, DGKA, DGKZ, EDN2, ERBB2, EREG, FBXO5, FOXJ1, GNA15, HSPA5, HSPE1, IFI27, IRAK1, ITGA2, LPAR2, LPAR3, MAP3K5, MDFI, MSH2, NLRP2, NPM1, P2RY2, P2RY6, PDCD6, PLK1, PMAIP1, POR, PRKCZ, PRSS8, PSMA4, PSMA5, PSMB2, PSMB3, PSMD11, PSMD2, PSME2, PTHLH, PYCARD, S100A9, SIPA1L1, SMAD3, SPHK2, STAT1, TGFA, TP53, TPX2, TRAF4, TRIB3, VA…	[ABL1, ABL2, ADCY5, ADRA2A, AGTR1, ANG, ANGPT1, BCL2, BDKRB1, BMP4, C5, CCL11, CCND2, CERK, COL4A3, CTGF, DGKB, EDNRA, FGF13, GADD45B, GADD45G, GHR, GNAO1, GNAQ, GPIHBP1, IL1B, ILK, ITGA1, KITLG, LRRK2, MAP3K6, MOAP1, MS4A1, NTRK2, P2RX1, PKN1, PRKACB, PRKAG2, PRKAR2B, PSMD12, RGN, RGS9, SELE, SYDE1, TGFB3, TGFBR1, TGM2, THBS1, TNNT2, TPD52L1, TPM1, TSC2, VLDLR, ZAK, ZEB2]	51.7544	48.2456	Common
GO:0030182	GO_BiologicalProcess_16.11.2010_17h17	neuron differentiation	95	20.8791	0.00581138	0.020703	[AGRN, ALDH1A2, APBB1, ATL1, BBS4, BCL11B, BCL2, BDNF, BMP4, BTG2, CCDC64, CDH1, CDK5R1, CELSR2, CTF1, DAPK3, DCLK1, DFNA5, DSCAML1, EFNA5, EGR2, EPHA4, EPHA7, ERBB2, ERBB3, ETV4, FEZ1, FGFR1, FOXA1, FOXA2, FZD1, FZD4, FZD7, GAS1, GAS7, GFRA3, GLI2, GNAO1, GNAQ, GPC2, GPR98, HOXC10, ID3, IGSF9, IHH, ILK, IRX5, ISL2, ITGA1, JAG2, LAMC1, LDB2, LGI4, LMNB2, LPPR4, MAP1B, MEF2C, MNX1, NDN, NNAT, NOTC…	[ABI2, ABT1, ACSL4, ACSL6, ACTB, ADCY1, ADM, ADNP2, ADORA2A, AFG3L2, AGER, AGRN, ALCAM, ALDH1A2, ALKBH1, ALMS1, ALS2, AMIGO1, APBB1, APC, APOE, APP, ARX, ASCL1, ATL1, ATOH1, ATP2B2, ATP7A, ATXN10, AXIN1, B3GNT2, BAI1, BAIAP2, BARHL2, BBS4, BCL11B, BCL2, BDNF, BMP4, BMP7, BMPR1B, BRSK1, BRSK2, BTG2, BTG4, C1orf187, C21orf33, C5orf13, CABP4, CACNA1A, CACNA1F, CCDC64, CCK, CCKAR, CD44, CDH1, CDH4, C…	[AGRN, BCL11B, CCDC64, CDH1, CDK5R1, CELSR2, DFNA5, EFNA5, EPHA4, ERBB2, ERBB3, ETV4, FOXA1, FOXA2, GPC2, GPR98, HOXC10, IGSF9, IHH, IRX5, ISL2, JAG2, LMNB2, MNX1, NR2F6, ONECUT2, PAX7, PTPRR, PTPRZ1, PVRL1, SLC1A3, SLITRK6, SOX2, TH, TP73, VEGFA]	[ALDH1A2, APBB1, ATL1, BBS4, BCL2, BDNF, BMP4, BTG2, CTF1, DAPK3, DCLK1, DSCAML1, EGR2, EPHA7, FEZ1, FGFR1, FZD1, FZD4, FZD7, GAS1, GAS7, GFRA3, GLI2, GNAO1, GNAQ, ID3, ILK, ITGA1, LAMC1, LDB2, LGI4, LPPR4, MAP1B, MEF2C, NDN, NNAT, NOTCH4, NRP2, NRTN, NRXN1, NTF3, NTN1, NTRK3, PIP5K1C, PRTFDC1, RBPJ, RND1, ROBO3, RORA, S100B, SDC2, SEMA3B, SLIT2, SLIT3, SPON2, SRF, TGFBR1, VASP, WNT2B]	37.8947	62.1053	Common
GO:0050679	GO_BiologicalProcess_16.11.2010_17h17	positive regulation of epithelial cell proliferation	22	28.2051	0.00577251	0.0207084	[ANG, BMP4, CCL11, CCL2, CCND2, ECM1, ERBB2, FGF13, FGF7, FGF9, FOXP1, FZD7, GAS1, IGF1, IHH, LAMC1, NME1, TGFA, THBS4, VASH2, VEGFA, VEGFB]	[AGGF1, ANG, ARNT, B4GALT1, BMP2, BMP4, BMPR1A, BMPR2, CCL11, CCL2, CCL24, CCL26, CCND2, CCR3, CDH13, CTNNB1, CYP7B1, DLX5, DLX6, ECM1, EGFR, EPGN, ERBB2, ERBB4, F3, FGF1, FGF10, FGF13, FGF7, FGF9, FOXE3, FOXP1, FOXP2, FOXP3, FRAP1, FZD7, GAS1, GRN, HIF1A, HMGB2, HRH3, HTR2B, IGF1, IHH, ITGB3, KDR, KGFLP1, KGFLP2, LACRT, LAMB1, LAMC1, MAP2K5, MBD4, MMP12, NME1, NME1-NME2, NOG, PDGFB, PGF, POLD4, …	[ERBB2, IHH, NME1, TGFA, VASH2, VEGFA]	[ANG, BMP4, CCL11, CCL2, CCND2, ECM1, FGF13, FGF7, FGF9, FOXP1, FZD7, GAS1, IGF1, LAMC1, THBS4, VEGFB]	27.2727	72.7273	Specific for Cluster 2
GO:0090101	GO_BiologicalProcess_16.11.2010_17h17	negative regulation of transmembrane receptor protein serine/threonine kinase signaling pathway	15	31.9149	0.00623333	0.0220531	[ACVR1, ASPN, CHRD, CIDEA, FBN1, FSTL3, HSPA5, HTRA1, LTBP1, ONECUT2, SMAD7, SMURF1, TGFB1I1, TGFB3, TP53]	[ACVR1, ADAMTSL2, ASPN, BAMBI, BCL9L, BMPER, CAV1, CER1, CHRD, CHST11, CIDEA, DAND5, EID2, ENG, FBN1, FBN2, FST, FSTL3, GREM1, HIPK2, HSPA5, HTRA1, LEMD3, LTBP1, NKX2-1, NOG, NOTCH1, ONECUT1, ONECUT2, PEG10, PIN1, PRDM16, SKI, SKIL, SMAD6, SMAD7, SMURF1, SNX6, SOST, TDGF3, TGFB1I1, TGFB3, TP53, TRIM33, TWSG1, VWC2, WNT5A]	[HSPA5, ONECUT2, SMURF1, TP53]	[ACVR1, ASPN, CHRD, CIDEA, FBN1, FSTL3, HTRA1, LTBP1, SMAD7, TGFB1I1, TGFB3]	26.6667	73.3333	Specific for Cluster 2
GO:0051173	GO_BiologicalProcess_16.11.2010_17h17	positive regulation of nitrogen compound metabolic process	143	19.8336	0.00630678	0.0221601	[ACVR1, ACVRL1, ADORA2B, ADRB1, AGRN, AKAP12, APEX1, ARNT2, ARRB1, ATF7IP, ATXN1, ATXN7L3, BARX2, BCL11B, BMP3, BMP4, BMP6, BRCC3, CAMKK2, CCNA2, CCNB1, CCNE1, CDC2, CDK7, COMT, CREB3L4, CREB5, DAB2, DDIT3, DNA2, E2F1, EBF1, EBF3, EGR2, EHF, EREG, ESRRA, EYA1, FAM175A, FGF13, FHL2, FOXA1, FOXA2, FOXF1, FOXF2, FOXJ2, FSTL3, FZD1, FZD4, FZD7, GATA6, GLI2, GLIS2, GRHL3, HAND1, HAND2, HDAC4, HHEX, HM…	[AATF, ABCA1, ABLIM3, ABRA, ACVR1, ACVR1B, ACVRL1, ADCY7, ADNP, ADORA2A, ADORA2B, ADRB1, ADRB2, AFAP1L2, AGRN, AGTR2, AHR, AKAP12, AKAP5, AKIRIN2, AKT1, AKT2, ALX1, ALX4, ANKRD49, ANXA3, APEX1, APOE, APP, AREG, ARHGEF11, ARID1A, ARID1B, ARNT, ARNT2, ARNTL, ARRB1, ASCL1, ASF1A, ATF1, ATF4, ATF6, ATF7IP, ATOH1, ATXN1, ATXN7L3, AVP, AXIN1, BAMBI, BARX2, BAZ1B, BCL10, BCL11B, BCL3, BCL9L, BLM, BLOC1S…	[ADORA2B, ADRB1, AGRN, APEX1, ATF7IP, ATXN7L3, BARX2, BCL11B, BMP3, BRCC3, CCNA2, CCNB1, CCNE1, CDC2, CDK7, COMT, CREB3L4, DNA2, E2F1, EHF, EREG, ESRRA, FOXA1, FOXA2, GRHL3, HMGA1, HRAS, IHH, IKZF2, INHBA, IRAK1, IRF6, KLF5, ONECUT2, PAX8, PAX9, PCBD1, POU2F1, POU5F1, PRKDC, PTHLH, PUS1, SEC14L2, SIX1, SIX2, SIX4, SMAD3, SMARCD1, SOX2, SOX4, TAF8, TLR2, TP53, TP63, TP73, VEGFA, WNT10A, WWTR1, ZBT…	[ACVR1, ACVRL1, AKAP12, ARNT2, ARRB1, ATXN1, BMP4, BMP6, CAMKK2, CREB5, DAB2, DDIT3, EBF1, EBF3, EGR2, EYA1, FAM175A, FGF13, FHL2, FOXF1, FOXF2, FOXJ2, FSTL3, FZD1, FZD4, FZD7, GATA6, GLI2, GLIS2, HAND1, HAND2, HDAC4, HHEX, HOXA13, ICAM1, IGF1, IL1B, ILK, JUN, KAT2B, KITLG, KLF15, LPIN2, MAOB, MEF2C, MEIS2, MEOX1, MITF, NFIC, NFIX, NOTCH4, NPR1, NR4A1, NR4A3, NTF3, PBX1, PGR, PLAGL1, PPARGC1A, PR…	41.2587	58.7413	Common
GO:0043523	GO_BiologicalProcess_16.11.2010_17h17	regulation of neuron apoptosis	24	27.2727	0.00641511	0.0222361	[ATM, BCL2, BDNF, CDK5R1, CRH, DHCR24, EPHA7, ERBB3, ESR1, FURIN, GHR, GRIK5, ILK, ITGA1, JUN, MSH2, NTF3, SIX1, SIX4, TGFB3, TP53, TP63, TP73, VEGFB]	[ADNP, ADORA2A, AGXT, AKT1S1, ALKBH1, ASCL1, ATM, ATP7A, BARHL1, BAX, BCL2, BCL2L1, BDNF, BIRC8, BRAF, CACNA1A, CASP6, CDK5, CDK5R1, CLN3, CNTF, CRH, DHCR24, DLX1, DNAJC5, EPHA7, EPX, ERBB3, ESR1, ESR2, F2R, FASLG, FURIN, GCLC, GCLM, GDNF, GHR, GPX1, GRID2, GRIK5, GRM4, HIPK2, HRK, IL18, ILK, ITGA1, JAK2, JUN, KCNIP3, LIG4, MAP3K11, MSH2, NEFL, NF1, NGF, NMNAT1, NQO1, NRBP2, NTF3, NTRK1, PCSK6, P…	[CDK5R1, CRH, DHCR24, ERBB3, FURIN, MSH2, SIX1, SIX4, TP53, TP63, TP73]	[ATM, BCL2, BDNF, EPHA7, ESR1, GHR, GRIK5, ILK, ITGA1, JUN, NTF3, TGFB3, VEGFB]	45.8333	54.1667	Common
GO:0045765	GO_BiologicalProcess_16.11.2010_17h17	regulation of angiogenesis	24	27.2727	0.00641511	0.0222361	[ADORA2B, ANGPT2, AQP1, C5, CCL11, COL4A2, COL4A3, CXCL10, ECM1, ERBB2, FGF13, HHEX, HTATIP2, ID1, IL1B, NPR1, SERPINF1, SFRP2, SRPX2, THBS1, THBS4, VASH2, VEGFA, VEGFB]	[ADORA2B, AGGF1, AMOT, ANGPT2, ANGPT4, ANGPTL3, ANGPTL4, ANXA3, APOH, AQP1, BTG1, C3, C3AR1, C5, C5AR1, CAMP, CCL11, CCL24, CCR3, CHRFAM7A, COL4A2, COL4A3, CTNNB1, CX3CL1, CX3CR1, CXCL10, ECM1, EFNA1, EPHA2, EPHB4, ERBB2, F3, FASLG, FGF13, FOXO4, FOXO6, GATA2, GATA4, GHRL, HDAC5, HDAC9, HHEX, HIF1A, HOXA5, HTATIP2, ID1, IL17F, IL1A, IL1B, IL6, KLKB1, KRT1, LECT1, MAPK7, NF1, NOS3, NPPB, NPR1, PF4…	[ADORA2B, ANGPT2, CXCL10, ERBB2, HTATIP2, ID1, SRPX2, VASH2, VEGFA]	[AQP1, C5, CCL11, COL4A2, COL4A3, ECM1, FGF13, HHEX, IL1B, NPR1, SERPINF1, SFRP2, THBS1, THBS4, VEGFB]	37.5	62.5	Common
GO:0051216	GO_BiologicalProcess_16.11.2010_17h17	cartilage development	24	27.2727	0.00641511	0.0222361	[BARX2, BMP3, BMP6, CHRDL2, CTGF, ESRRA, FGF13, FGF9, FGFR1, GHR, HOXA11, HOXB3, MEF2D, MGP, PAX7, PKD1, PRRX1, RORA, SFRP2, THBS1, THBS3, THRA, WNT2B, ZEB1]	[ALX1, AMELX, ATP7A, BARX2, BMP1, BMP3, BMP5, BMP6, BMP7, BMP8A, BMP8B, BMPR1A, BMPR1B, CHRDL2, CHST11, COL11A2, COL1A1, COL2A1, COL9A1, COMP, CREB3L2, CTGF, CYTL1, EDN1, EIF2AK3, ESRRA, EVC, FGF13, FGF18, FGF4, FGF6, FGF9, FGFR1, FOXD1, FOXD2, FOXD3, FOXD4, FOXD4L1, FOXD4L3, FOXD4L4, FOXD4L5, FOXD4L6, FOXL1, GFPT1, GHR, GHRL, GNAS, HOXA11, HOXA3, HOXA5, HOXB3, HOXC4, HOXD11, HOXD3, IL17F, IMPAD1…	[BARX2, BMP3, ESRRA, HOXB3, PAX7]	[BMP6, CHRDL2, CTGF, FGF13, FGF9, FGFR1, GHR, HOXA11, MEF2D, MGP, PKD1, PRRX1, RORA, SFRP2, THBS1, THBS3, THRA, WNT2B, ZEB1]	20.8333	79.1667	Specific for Cluster 2
GO:0045935	GO_BiologicalProcess_16.11.2010_17h17	positive regulation of nucleobase, nucleoside, nucleotide and nucleic acid metabolic process	139	19.8856	0.00640315	0.0223457	[ACVR1, ACVRL1, ADORA2B, ADRB1, AGRN, AKAP12, APEX1, ARNT2, ARRB1, ATF7IP, ATXN1, ATXN7L3, BARX2, BCL11B, BMP3, BMP4, BMP6, BRCC3, CAMKK2, CCNA2, CCNB1, CCNE1, CDC2, CDK7, CREB3L4, CREB5, DAB2, DDIT3, DNA2, E2F1, EBF1, EBF3, EGR2, EHF, EREG, ESRRA, EYA1, FAM175A, FGF13, FHL2, FOXA1, FOXA2, FOXF1, FOXF2, FOXJ2, FSTL3, FZD1, FZD4, FZD7, GATA6, GLI2, GLIS2, GRHL3, HAND1, HAND2, HDAC4, HHEX, HMGA1, H…	[AATF, ABCA1, ABLIM3, ABRA, ACVR1, ACVR1B, ACVRL1, ADCY7, ADNP, ADORA2A, ADORA2B, ADRB1, ADRB2, AFAP1L2, AGRN, AHR, AKAP12, AKAP5, AKIRIN2, AKT2, ALX1, ALX4, ANKRD49, ANXA3, APEX1, APOE, APP, AREG, ARHGEF11, ARID1A, ARID1B, ARNT, ARNT2, ARNTL, ARRB1, ASCL1, ASF1A, ATF1, ATF4, ATF6, ATF7IP, ATOH1, ATXN1, ATXN7L3, AVP, AXIN1, BAMBI, BARX2, BAZ1B, BCL10, BCL11B, BCL3, BCL9L, BLM, BLOC1S2, BMP10, BMP…	[ADORA2B, ADRB1, AGRN, APEX1, ATF7IP, ATXN7L3, BARX2, BCL11B, BMP3, BRCC3, CCNA2, CCNB1, CCNE1, CDC2, CDK7, CREB3L4, DNA2, E2F1, EHF, EREG, ESRRA, FOXA1, FOXA2, GRHL3, HMGA1, HRAS, IHH, IKZF2, INHBA, IRAK1, IRF6, KLF5, ONECUT2, PAX8, PAX9, PCBD1, POU2F1, POU5F1, PRKDC, PTHLH, PUS1, SEC14L2, SIX1, SIX2, SIX4, SMAD3, SMARCD1, SOX2, SOX4, TAF8, TLR2, TP53, TP63, TP73, VEGFA, WNT10A, WWTR1, ZBTB7B]	[ACVR1, ACVRL1, AKAP12, ARNT2, ARRB1, ATXN1, BMP4, BMP6, CAMKK2, CREB5, DAB2, DDIT3, EBF1, EBF3, EGR2, EYA1, FAM175A, FGF13, FHL2, FOXF1, FOXF2, FOXJ2, FSTL3, FZD1, FZD4, FZD7, GATA6, GLI2, GLIS2, HAND1, HAND2, HDAC4, HHEX, HOXA13, IGF1, IL1B, ILK, JUN, KAT2B, KITLG, KLF15, LPIN2, MEF2C, MEIS2, MEOX1, MITF, NFIC, NFIX, NOTCH4, NPR1, NR4A1, NR4A3, NTF3, PBX1, PGR, PLAGL1, PPARGC1A, RASL11A, RBPJ, …	41.7266	58.2734	Common
GO:0007611	GO_BiologicalProcess_16.11.2010_17h17	learning or memory	29	25.8929	0.00651446	0.022429	[AMPH, ATP1A2, ATXN1, BCHE, BDNF, CALB1, COMT, CRH, EGR2, FYN, IL1B, ITGA3, ITGA5, JUN, MEF2C, NLGN3, NTF4, PDE1B, PDE5A, PRKAR2B, PRKCZ, PTN, S100B, SERPINF1, TAC1, TH, THRA, TMOD2, VLDLR]	[AAAS, ABI2, ACSL4, ADAM2, ADCY1, ADCY8, ADNP, ADRA1B, AFF2, AMPH, APP, ATP1A2, ATXN1, BCHE, BDNF, CALB1, CASP1, CDK5, CHRFAM7A, CHRNB2, CHST10, CLN3, CLN8, COMT, CRH, CRHBP, CTNND2, CYP7B1, DBH, DRD1, DRD2, DRD3, DRD5, EGR1, EGR2, EPHB2, ESR2, FOS, FOSL1, FOXP2, FYN, FZD9, GABRA5, GALR2, GALR3, GLP1R, GM2A, GRIA1, GRIN1, GRIN2A, GRIN2B, GRM4, GRPR, HRH3, HTR2A, IL1B, ITGA3, ITGA5, ITGA8, JUN, KI…	[CALB1, COMT, CRH, ITGA3, NTF4, PRKCZ, TAC1, TH]	[AMPH, ATP1A2, ATXN1, BCHE, BDNF, EGR2, FYN, IL1B, ITGA5, JUN, MEF2C, NLGN3, PDE1B, PDE5A, PRKAR2B, PTN, S100B, SERPINF1, THRA, TMOD2, VLDLR]	27.5862	72.4138	Specific for Cluster 2
GO:0046365	GO_BiologicalProcess_16.11.2010_17h17	monosaccharide catabolic process	19	29.2308	0.00656087	0.0224382	[DHTKD1, ENO1, ENO2, FUT2, GALE, GAPDH, GNPDA1, HIBADH, HOOK1, KIF2A, LDHA, NUDT5, PDHA1, PFKL, PGD, PGK1, PGLS, PKM2, RPIA]	[ADPGK, ALDOA, ALDOB, ALDOC, BAD, BPGM, DHDH, DHTKD1, DLAT, ENO1, ENO2, ENO3, FUT1, FUT10, FUT2, FUT4, FUT5, FUT6, FUT7, FUT8, FUT9, GALE, GAPDH, GNPDA1, GPI, H6PD, HIBADH, HKDC1, HOOK1, HOOK3, KIF2A, LDHA, LDHAL6A, LDHAL6B, LDHB, LDHC, LRP5, MDH1, MDH2, NUDT5, OGDH, OGDHL, PDHA1, PDHA2, PDHB, PFKFB1, PFKFB2, PFKL, PFKM, PFKP, PGAM2, PGAM4, PGD, PGK1, PGK2, PGLS, PGM1, PKLR, PKM2, RPIA, TALDO1, T…	[DHTKD1, ENO1, FUT2, GALE, GAPDH, GNPDA1, HOOK1, KIF2A, LDHA, NUDT5, PDHA1, PFKL, PGD, PGK1, PGLS, PKM2, RPIA]	[ENO2, HIBADH]	89.4737	10.5263	Specific for Cluster 1
GO:0051347	GO_BiologicalProcess_16.11.2010_17h17	positive regulation of transferase activity	57	22.4409	0.00665216	0.0225997	[ADCY5, ADORA2B, ADRA2A, ANG, ANGPT1, BDKRB1, BMP4, C5, CCND1, CCND2, CD24, CENPE, CERK, DGKA, DGKB, DGKZ, EDN2, EDNRA, ERBB2, EREG, FGF13, GADD45B, GADD45G, GHR, HSPA5, IL1B, ILK, IRAK1, ITGA1, KITLG, LPAR2, LPAR3, LRRK2, MAP3K5, MAP3K6, MDFI, MS4A1, NPM1, PKN1, PRKACB, PRKAG2, PRKAR2B, PRKCZ, S100A9, SPHK2, TGFA, TGFB3, TGFBR1, THBS1, TPD52L1, TPX2, TRAF4, VAV2, VAV3, VLDLR, ZAK, ZEB2]	[ACD, ACVR2B, ADAM17, ADAM9, ADCY1, ADCY2, ADCY4, ADCY5, ADCY6, ADCY7, ADCY8, ADNP, ADORA1, ADORA2A, ADORA2B, ADRA2A, ADRA2B, ADRA2C, ADRB2, AGK, AKT1, ALS2, ANG, ANGPT1, APOA1, ARTN, AXIN1, AZU1, BDKRB1, BIRC7, BMP4, C1QTNF2, C5, C5AR1, CALCA, CARD10, CARD14, CARTPT, CCDC88A, CCK, CCND1, CCND2, CCND3, CCNY, CD24, CD4, CD74, CD81, CDK5, CENPE, CERK, CERKL, CHRFAM7A, CHRM1, CHRNA3, CLSPN, CSF1, CX…	[ADORA2B, CCND1, CD24, CENPE, DGKA, DGKZ, EDN2, ERBB2, EREG, HSPA5, IRAK1, LPAR2, LPAR3, MAP3K5, MDFI, NPM1, PRKCZ, S100A9, SPHK2, TGFA, TPX2, TRAF4, VAV2, VAV3]	[ADCY5, ADRA2A, ANG, ANGPT1, BDKRB1, BMP4, C5, CCND2, CERK, DGKB, EDNRA, FGF13, GADD45B, GADD45G, GHR, IL1B, ILK, ITGA1, KITLG, LRRK2, MAP3K6, MS4A1, PKN1, PRKACB, PRKAG2, PRKAR2B, TGFB3, TGFBR1, THBS1, TPD52L1, VLDLR, ZAK, ZEB2]	42.1053	57.8947	Common
GO:0070201	GO_BiologicalProcess_16.11.2010_17h17	regulation of establishment of protein localization	39	24.0741	0.00695793	0.023483	[ANG, AXIN2, BMP4, C5, CDC2, CDH1, CIDEA, EPB41L5, FLNA, FZD7, GNAQ, IL1B, JUP, KRT20, MDFI, MXI1, NLRP2, PKIA, PKIG, POU5F1, PRKCZ, PYCARD, RBP4, RBPMS, S100A9, SAA1, SCAMP5, SLC25A23, SMAD3, SORBS1, SRGN, TACC3, TGFB3, TGFBR1, THRA, TLR2, TXN, WWP2, WWTR1]	[ACHE, ADAM9, ADORA2A, AKAP1, AKAP5, AKT1, ANG, APOA1, APPL1, ARFIP1, AXIN1, AXIN2, BAMBI, BARD1, BCL3, BMP4, BMPR1A, C5, CADM1, CARD8, CASP1, CD27, CD40, CD40LG, CDC2, CDH1, CDK5, CDKN2A, CHIA, CIDEA, CRTAM, CYLD, DNAJC1, DPH3, DRD2, DRD3, DRD4, EDA, EGF, EGFR, EMD, EP300, EPB41L5, EXOC4, FAF1, FLNA, FOXP3, FZD7, G3BP2, GAPVD1, GCC2, GLI3, GLMN, GNAQ, GOPC, GPAM, GREM1, GSK3B, HTR2B, IFNG, IL10,…	[CDC2, CDH1, JUP, KRT20, MDFI, NLRP2, PKIA, POU5F1, PRKCZ, PYCARD, S100A9, SAA1, SCAMP5, SMAD3, TACC3, TLR2, TXN, WWP2, WWTR1]	[ANG, AXIN2, BMP4, C5, CIDEA, EPB41L5, FLNA, FZD7, GNAQ, IL1B, MXI1, PKIG, RBP4, RBPMS, SLC25A23, SORBS1, SRGN, TGFB3, TGFBR1, THRA]	48.7179	51.2821	Common
GO:0010605	GO_BiologicalProcess_16.11.2010_17h17	negative regulation of macromolecule metabolic process	165	19.4805	0.00714867	0.0236598	[A2M, ADIPOQ, ADORA2B, ANAPC10, ANG, ANTXR1, APBB1, ARID5A, ARID5B, ARRB1, ARRB2, ASCL2, ATF7IP, ATXN1, BARX2, BCL6B, BDKRB1, BDKRB2, BMP4, BNIP3, BUB1B, CCNB1, CDC20, CDC45L, CDC6, CDT1, CENPF, CNKSR3, COLEC12, CRYAB, CRYM, DAB2, DEDD2, DKK3, DNAJB5, E2F1, ENO1, ENPP1, ERCC4, EREG, FAM129A, FBXO5, FGF13, FLNA, FOXA1, FOXF1, FOXF2, FOXJ1, FOXN3, FOXP1, FURIN, FZD1, GATA6, GATAD2A, GLI2, GLIS2, GM…	[A2M, AATF, ACD, ADAR, ADIPOQ, ADNP, ADORA2B, ADRA1B, AES, AIFM2, AKAP1, AKIRIN2, AKT2, ALX1, ANAPC1, ANAPC10, ANAPC11, ANAPC2, ANAPC4, ANAPC5, ANAPC7, ANG, ANKRD13C, ANTXR1, APBB1, APOA4, APOM, ARID4A, ARID5A, ARID5B, ARRB1, ARRB2, ASAH3L, ASB1, ASCL1, ASCL2, ASZ1, ATF7IP, ATG5, ATN1, ATP8B1, ATXN1, AXIN1, BACE2, BAG5, BAHD1, BARD1, BARX2, BASP1, BAX, BAZ2A, BCL2L1, BCL3, BCL6, BCL6B, BCL7A, BCL…	[ADORA2B, ANAPC10, ASCL2, ATF7IP, BARX2, BUB1B, CCNB1, CDC20, CDC45L, CDC6, CDT1, CENPF, DEDD2, E2F1, ENO1, EREG, FBXO5, FOXA1, FOXJ1, FURIN, GATAD2A, GMNN, HELLS, HES2, HEY1, HOXB4, HSBP1, ID1, IGF2BP2, IGF2BP3, IGFBP3, INHBA, LCOR, MAD2L1, MDFI, MSH2, NACC1, NPM1, NR2F6, PAX9, PKIA, POU2F1, PRKCZ, PSMA4, PSMA5, PSMB2, PSMB3, PSMD11, PSMD2, PSME2, PTPRU, RNF128, S100A11, S100A9, SCGB1A1, SIRT6, …	[A2M, ADIPOQ, ANG, ANTXR1, APBB1, ARID5A, ARID5B, ARRB1, ARRB2, ATXN1, BCL6B, BDKRB1, BDKRB2, BMP4, BNIP3, CNKSR3, COLEC12, CRYAB, CRYM, DAB2, DKK3, DNAJB5, ENPP1, ERCC4, FAM129A, FGF13, FLNA, FOXF1, FOXF2, FOXN3, FOXP1, FZD1, GATA6, GLI2, GLIS2, HAND1, HDAC4, HHEX, ID3, IGFBP5, JAZF1, JDP2, JUN, KLF10, KLF4, LDB2, LMCD1, LRRFIP1, MASP1, MEF2C, MEIS2, MLH1, NFIC, NFIX, NR2F1, PBXIP1, PER1, PER2, …	43.0303	56.9697	Common
GO:0015698	GO_BiologicalProcess_16.11.2010_17h17	inorganic anion transport	16	30.7692	0.00712116	0.0237218	[ANO1, APOL1, CLIC3, CLIC4, ENPP1, FXYD1, FXYD3, P2RY6, RACGAP1, SLC20A1, SLC20A2, SLC26A2, SLC26A6, SLC4A11, SLC4A4, TST]	[ANKH, ANO1, APOL1, BEST1, BEST3, CFTR, CLCN4, CLCN6, CLIC1, CLIC3, CLIC4, CLIC5, CLNS1A, ENPP1, ENPP3, FXYD1, FXYD3, GLRA1, MPST, NMUR1, P2RY4, P2RY6, PCYOX1, RACGAP1, SLC11A1, SLC12A2, SLC13A1, SLC13A4, SLC17A1, SLC17A7, SLC20A1, SLC20A2, SLC26A1, SLC26A11, SLC26A2, SLC26A3, SLC26A4, SLC26A5, SLC26A6, SLC26A7, SLC26A8, SLC26A9, SLC34A1, SLC34A2, SLC34A3, SLC4A10, SLC4A11, SLC4A4, SLC4A7, TG, TS…	[ANO1, APOL1, CLIC3, FXYD3, P2RY6, RACGAP1, SLC20A1, SLC26A2, SLC26A6, SLC4A11, SLC4A4, TST]	[CLIC4, ENPP1, FXYD1, SLC20A2]	75	25	Specific for Cluster 1
GO:0000079	GO_BiologicalProcess_16.11.2010_17h17	regulation of cyclin-dependent protein kinase activity	18	29.5082	0.00721963	0.0237415	[CASP3, CCND1, CCND2, CCNE2, CDC25C, CDC6, CDK5R1, CDK7, CDKN2B, CDKN3, CHEK1, CKS1B, CKS2, KAT2B, LATS2, PKMYT1, SERTAD1, SFN]	[ADAM17, AKT1, ANAPC2, APC, BCCIP, BLM, C13orf15, CASP3, CCND1, CCND2, CCND3, CCNE2, CCNG1, CCNK, CCNT1, CCNT2, CCNY, CDC25A, CDC25C, CDC37, CDC6, CDK5R1, CDK5R2, CDK5RAP1, CDK5RAP3, CDK7, CDKN1B, CDKN1C, CDKN2A, CDKN2B, CDKN2C, CDKN2D, CDKN3, CHEK1, CKS1B, CKS2, DIRAS3, EGFR, FGF10, GADD45A, GTF2H1, GTPBP4, HERC5, HEXIM1, HEXIM2, KAT2B, LATS1, LATS2, LONP1, MEN1, MNAT1, NR2F2, PAK3, PKMYT1, PROX…	[CASP3, CCND1, CCNE2, CDC25C, CDC6, CDK5R1, CDK7, CDKN3, CHEK1, CKS1B, CKS2, PKMYT1, SFN]	[CCND2, CDKN2B, KAT2B, LATS2, SERTAD1]	72.2222	27.7778	Specific for Cluster 1
GO:0042326	GO_BiologicalProcess_16.11.2010_17h17	negative regulation of phosphorylation	18	29.5082	0.00721963	0.0237415	[ATXN1, BDKRB1, BDKRB2, BMP4, CCNB1, CDKN2B, CNKSR3, ENPP1, FAM129A, IGFBP3, INHBA, JUN, PPAP2B, PRKCZ, SFRP2, SLIT2, SMAD3, SMAD7]	[ATXN1, BDKRB1, BDKRB2, BMP4, BMP7, CAV1, CCNB1, CDKN1B, CDKN1C, CDKN2A, CDKN2B, CDKN2C, CDKN2D, CNKSR3, DUSP6, DYNLL1, ENG, ENPP1, ERRFI1, FAM129A, GRB10, IBTK, IGFBP3, IL2, INHA, INHBA, INPP5J, INPP5K, INSR, JUN, LRP6, MAS1, MEN1, MLXIPL, NF2, NLRP12, PAK3, PARK2, PEBP1, PPAP2B, PPP2CA, PPP2R1A, PRKCA, PRKCD, PRKCZ, PRKRIP1, PSEN1, PSEN2, PTEN, PTPN6, PTPRC, SFRP1, SFRP2, SLIT2, SMAD3, SMAD6, S…	[CCNB1, IGFBP3, INHBA, PRKCZ, SMAD3]	[ATXN1, BDKRB1, BDKRB2, BMP4, CDKN2B, CNKSR3, ENPP1, FAM129A, JUN, PPAP2B, SFRP2, SLIT2, SMAD7]	27.7778	72.2222	Specific for Cluster 2
GO:0035108	GO_BiologicalProcess_16.11.2010_17h17	limb morphogenesis	27	26.2136	0.00711426	0.0238537	[ALDH1A2, BMP4, CHD7, CRABP2, FGF9, FGFR1, GAS1, GLI2, GNA12, GNAQ, HOXA10, HOXA11, HOXA13, HOXC10, MBNL1, MSX2, NOTCH2, PBX1, PRRX1, PTCH1, RAB23, SFRP2, TBX5, TP63, TWIST1, ZBTB16, ZNF358]	[ACD, ALDH1A2, ALX1, ALX3, ALX4, ASPH, BMP4, BMP7, BMPR1A, BMPR1B, C2CD3, CHD7, CHST11, COL2A1, CRABP2, CTNNB1, CYP26B1, DICER1, DKK1, DLX5, DLX6, ECE1, EN1, EVX2, FBN2, FBXW4, FGF10, FGF4, FGF9, FGFR1, FLVCR1, FOXL1, GAS1, GDF5, GJA1, GJA5, GLI2, GLI3, GNA12, GNAQ, GNAS, GREM1, HNF1A, HOXA10, HOXA11, HOXA13, HOXC10, HOXC11, HOXD10, HOXD11, HOXD12, HOXD13, HOXD9, IFT52, IFT88, IMPAD1, KIAA1715, K…	[CHD7, CRABP2, HOXC10, TP63]	[ALDH1A2, BMP4, FGF9, FGFR1, GAS1, GLI2, GNA12, GNAQ, HOXA10, HOXA11, HOXA13, MBNL1, MSX2, NOTCH2, PBX1, PRRX1, PTCH1, RAB23, SFRP2, TBX5, TWIST1, ZBTB16, ZNF358]	14.8148	85.1852	Specific for Cluster 2
GO:0006468	GO_BiologicalProcess_16.11.2010_17h17	protein phosphorylation	127	20	0.0073738	0.024094	[ABL1, ABL2, ACVR1, ACVRL1, ADORA2B, AKT3, ANTXR1, ATM, AURKA, AURKB, AXL, BCL2, BMP4, BUB1, BUB1B, C5, CAD, CAMK1, CAMKK1, CAMKK2, CCL11, CCL2, CDC2, CDC42BPG, CDC7, CDK5R1, CDK7, CHEK1, CSK, DAPK3, DCLK1, DCLK2, DDR1, DDR2, DMPK, EFEMP1, EPHA1, EPHA3, EPHA4, EPHA7, EPHB6, ERBB2, ERBB3, ERG, FGF13, FGFR1, FYN, GADD45B, GADD45G, GHR, IGFBP3, IKBKE, IL1B, ILK, IRAK1, IRAK2, ITGA1, JAK1, LATS2, LPA…	[AAK1, AATK, ABI1, ABI2, ABI3, ABL1, ABL2, ACVR1, ACVR1B, ACVR1C, ACVR2A, ACVR2B, ACVRL1, ADAM10, ADAM9, ADORA1, ADORA2B, ADRA2B, ADRA2C, ADRBK1, ADRBK2, AKT1, AKT3, ALK, ALPK1, ALPK2, ALPK3, AMHR2, ANKK1, ANTXR1, APP, ARAF, ARHGEF7, ATM, AURKA, AURKB, AURKC, AXIN1, AXL, BAZ1B, BCKDK, BCL2, BCR, BIRC7, BLK, BMP10, BMP2, BMP2K, BMP4, BMP7, BMPR1A, BMPR1B, BMPR2, BMX, BRAF, BRSK1, BRSK2, BTK, BUB1,…	[ADORA2B, AURKA, AURKB, BUB1, BUB1B, CAD, CDC2, CDC42BPG, CDC7, CDK5R1, CDK7, CHEK1, CSK, DDR1, EPHA1, EPHA4, EPHB6, ERBB2, ERBB3, IGFBP3, IKBKE, IRAK1, IRAK2, LPAR2, LPAR3, MAP3K5, MAP4K3, MAPK13, MAPKAPK3, MDFI, MELK, MOCOS, MST1R, NEK2, OBSCN, PBK, PDIK1L, PDK3, PKMYT1, PLK1, PLK4, PPP4R1, PRKCZ, PRKD2, PRKDC, PTK6, PTK7, RIPK4, RPS6KA1, RPS6KA4, SBK1, SRPK1, STAT1, STK32C, TGFA, TLR2, TNK1, T…	[ABL1, ABL2, ACVR1, ACVRL1, AKT3, ANTXR1, ATM, AXL, BCL2, BMP4, C5, CAMK1, CAMKK1, CAMKK2, CCL11, CCL2, DAPK3, DCLK1, DCLK2, DDR2, DMPK, EFEMP1, EPHA3, EPHA7, ERG, FGF13, FGFR1, FYN, GADD45B, GADD45G, GHR, IL1B, ILK, ITGA1, JAK1, LATS2, LRRK2, MAP3K6, MAPK4, MYLK, NEK5, NEK7, NPR1, NPR2, NR4A3, NRK, NTRK2, NTRK3, PDGFRB, PDK4, PKN1, PRKAA2, PRKACB, PRKCB, ROCK2, RORA, SMAD7, SNRK, SPEG, SRPK3, ST…	48.0315	51.9685	Common
GO:0045597	GO_BiologicalProcess_16.11.2010_17h17	positive regulation of cell differentiation	59	22.1805	0.00754697	0.0245038	[ACVR1, ADAMTS9, AGTR1, ALOX12, AXIN2, BCL2, BDNF, BMP4, BMP6, BOC, CA2, CAMK1, CCNE1, CD36, CDKN2B, EPB41L5, FGF13, FOXA1, FOXA2, GATA6, GDF10, GHR, GLI2, HOXA11, IGFBP3, IHH, ILK, INHBA, ITPKB, JUN, KITLG, KLF10, LPL, MAP1B, MAPT, NCKAP1L, NTF3, NTN1, NTRK3, PDLIM7, PLXNB1, RTN4, SERPINF1, SFRP4, SLIT2, SMAD3, SNAI1, SOX2, SRF, STAT5B, TBX5, TGFB1I1, TGFB3, THRA, TNFRSF12A, TSHZ3, WWTR1, XRCC5,…	[ACIN1, ACTR3, ACVR1, ACVR1B, ACVR2A, ACVR2B, ADA, ADAMTS20, ADAMTS9, ADIG, ADNP, ADRA2B, ADRA2C, AGTR1, AGXT, AKAP5, AKT1, ALOX12, AMIGO1, ANAPC2, ANKRD54, AP3B1, APC, APOB, ARHGDIA, ARHGEF1, ARNT, ASCL1, ATOH1, AXIN2, BAD, BAMBI, BCL2, BCL9L, BDNF, BMP2, BMP4, BMP6, BMP7, BMPR1A, BMPR1B, BMPR2, BOC, BTC, BTG1, CA2, CALCA, CAMK1, CCL5, CCNE1, CD27, CD276, CD36, CD74, CD80, CD83, CD86, CDH4, CDKN…	[ALOX12, CA2, CCNE1, FOXA1, FOXA2, IGFBP3, IHH, INHBA, PLXNB1, SMAD3, SOX2, WWTR1, XRCC5, ZNF488]	[ACVR1, ADAMTS9, AGTR1, AXIN2, BCL2, BDNF, BMP4, BMP6, BOC, CAMK1, CD36, CDKN2B, EPB41L5, FGF13, GATA6, GDF10, GHR, GLI2, HOXA11, ILK, ITPKB, JUN, KITLG, KLF10, LPL, MAP1B, MAPT, NCKAP1L, NTF3, NTN1, NTRK3, PDLIM7, RTN4, SERPINF1, SFRP4, SLIT2, SNAI1, SRF, STAT5B, TBX5, TGFB1I1, TGFB3, THRA, TNFRSF12A, TSHZ3]	23.7288	76.2712	Specific for Cluster 2
GO:0005996	GO_BiologicalProcess_16.11.2010_17h17	monosaccharide metabolic process	49	22.8972	0.00764234	0.0246574	[ADIPOQ, ATF3, CREM, CRYAB, CSGALNACT1, DHTKD1, ENO1, ENO2, EPM2A, FBP1, FUT2, GALE, GALK2, GAPDH, GFPT2, GMDS, GNPDA1, GNPDA2, GPD2, GYG1, GYG2, HIBADH, HOOK1, KHK, KIF2A, LDHA, MAN2A2, NUDT5, PDHA1, PDK3, PDK4, PFKFB4, PFKL, PGD, PGK1, PGLS, PGM5, PKM2, PPARGC1A, PPP1CA, PPP1R1A, PPP1R3B, PRKAG2, PYGB, PYGM, RBP4, RPIA, SLC35A2, TSTA3]	[ADIPOQ, ADPGK, AGL, AKR1A1, ALDH5A1, ALDOA, ALDOB, ALDOC, AMDHD2, ATF3, ATF4, B3GALTL, B4GALNT2, B4GALT1, BAD, BPGM, BRS3, CACNA1A, CHST1, CHST2, CHST4, CHST5, CHST6, CHST7, CPT1A, CREM, CRYAB, CSGALNACT1, CYP21A2, DCXR, DHDH, DHTKD1, DLAT, DPAGT1, ENO1, ENO2, ENO3, EPM2A, EXTL2, FBP1, FBP2, FN3K, FPGT, FUCA1, FUCA2, FUT1, FUT10, FUT2, FUT4, FUT5, FUT6, FUT7, FUT8, FUT9, G6PC, G6PC2, G6PC3, GAA,…	[DHTKD1, ENO1, FBP1, FUT2, GALE, GALK2, GAPDH, GMDS, GNPDA1, GPD2, HOOK1, KIF2A, LDHA, NUDT5, PDHA1, PDK3, PFKFB4, PFKL, PGD, PGK1, PGLS, PKM2, PPP1CA, RPIA, SLC35A2, TSTA3]	[ADIPOQ, ATF3, CREM, CRYAB, CSGALNACT1, ENO2, EPM2A, GFPT2, GNPDA2, GYG1, GYG2, HIBADH, KHK, MAN2A2, PDK4, PGM5, PPARGC1A, PPP1R1A, PPP1R3B, PRKAG2, PYGB, PYGM, RBP4]	53.0612	46.9388	Common
GO:0055065	GO_BiologicalProcess_16.11.2010_17h17	metal ion homeostasis	48	22.9665	0.00775872	0.0247219	[AGTR1, ATP1A2, ATP7B, BCL2, BDKRB1, BDKRB2, C7, CACNA1C, CCL11, CCL2, CCRL1, CD24, CNOT6, CXCL12, CXCL13, EDN2, EDNRA, EPHX2, FXYD1, GNA15, GRIK5, IL1B, ITPR1, ITPR3, JPH2, KCNA5, KCNK3, LPAR2, LPAR3, P2RY2, PGM5, PKD2, PLN, PYGM, RGN, RIC3, RYR2, RYR3, S1PR3, SAA1, SLC24A3, SLC8A1, SYPL2, TAC1, TGM2, TRIM24, TRPC1, TRPV4]	[ADM, ADRA1A, AGTR1, AGXT, ANXA7, APOE, APP, ASNA1, ATP1A2, ATP2A1, ATP2A2, ATP2C1, ATP7B, AVP, AVPR1A, AVPR1B, BCL2, BDKRB1, BDKRB2, C3AR1, C5AR1, C7, CACNA1A, CACNA1C, CACNA1F, CACNA1G, CACNB4, CALCA, CALCB, CALCR, CALR, CASR, CAV1, CAV3, CBARA1, CCBP2, CCDC47, CCKAR, CCKBR, CCL1, CCL11, CCL13, CCL14, CCL15, CCL19, CCL2, CCL23, CCL3, CCL5, CCL7, CCR1, CCR2, CCR3, CCR5, CCR6, CCR7, CCR8, CCRL1, …	[ATP7B, CD24, CNOT6, CXCL13, EDN2, GNA15, ITPR3, LPAR2, LPAR3, P2RY2, SAA1, TAC1, TRIM24, TRPV4]	[AGTR1, ATP1A2, BCL2, BDKRB1, BDKRB2, C7, CACNA1C, CCL11, CCL2, CCRL1, CXCL12, EDNRA, EPHX2, FXYD1, GRIK5, IL1B, ITPR1, JPH2, KCNA5, KCNK3, PGM5, PKD2, PLN, PYGM, RGN, RIC3, RYR2, RYR3, S1PR3, SLC24A3, SLC8A1, SYPL2, TGM2, TRPC1]	29.1667	70.8333	Specific for Cluster 2
GO:0001704	GO_BiologicalProcess_16.11.2010_17h17	formation of primary germ layer	15	31.25	0.00772449	0.0247666	[ACVR1, BMP4, CHRD, EPB41L5, FOXA2, INHBA, KLF4, NR4A3, POU5F1, SMAD3, SNAI1, SOX17, SRF, TBX6, TXNRD1]	[ACVR1, AXIN1, BMP4, BMP7, BMPR1A, BMPR2, CHRD, CTNNB1, ECSIT, EOMES, EPB41L5, EPHA2, EXT2, EYA2, FOXA2, FOXC1, FOXC2, HNF1A, INHBA, KLF4, LEF1, LHX1, MACF1, MESP1, MIXL1, NF2, NODAL, NR4A3, POU5F1, PRKAR1A, PRKCA, SLC6A4, SMAD1, SMAD2, SMAD3, SNAI1, SOX17, SOX7, SRF, TBX6, TDGF3, TLX2, TRIM15, TWSG1, TXNRD1, WNT3, WNT3A, WNT8A]	[FOXA2, INHBA, POU5F1, SMAD3, TBX6]	[ACVR1, BMP4, CHRD, EPB41L5, KLF4, NR4A3, SNAI1, SOX17, SRF, TXNRD1]	33.3333	66.6667	Specific for Cluster 2
GO:0051223	GO_BiologicalProcess_16.11.2010_17h17	regulation of protein transport	37	24.026	0.00868942	0.0271809	[ANG, AXIN2, BMP4, C5, CDC2, CDH1, CIDEA, FLNA, FZD7, GNAQ, IL1B, JUP, KRT20, MDFI, MXI1, NLRP2, PKIA, PKIG, POU5F1, PRKCZ, PYCARD, RBP4, RBPMS, S100A9, SAA1, SCAMP5, SLC25A23, SMAD3, SRGN, TACC3, TGFB3, TGFBR1, THRA, TLR2, TXN, WWP2, WWTR1]	[ACHE, ADAM9, ADORA2A, AKAP1, AKAP5, ANG, APOA1, ARFIP1, AXIN1, AXIN2, BAMBI, BARD1, BCL3, BMP4, BMPR1A, C5, CADM1, CARD8, CASP1, CD27, CD40, CD40LG, CDC2, CDH1, CDK5, CDKN2A, CHIA, CIDEA, CRTAM, CYLD, DNAJC1, DPH3, DRD2, DRD3, DRD4, EDA, EGF, EGFR, EMD, EP300, EXOC4, FAF1, FLNA, FOXP3, FZD7, G3BP2, GAPVD1, GCC2, GLI3, GLMN, GNAQ, GOPC, GPAM, GREM1, GSK3B, HTR2B, IFNG, IL10, IL13, IL1A, IL1B, IL2…	[CDC2, CDH1, JUP, KRT20, MDFI, NLRP2, PKIA, POU5F1, PRKCZ, PYCARD, S100A9, SAA1, SCAMP5, SMAD3, TACC3, TLR2, TXN, WWP2, WWTR1]	[ANG, AXIN2, BMP4, C5, CIDEA, FLNA, FZD7, GNAQ, IL1B, MXI1, PKIG, RBP4, RBPMS, SLC25A23, SRGN, TGFB3, TGFBR1, THRA]	51.3514	48.6486	Common
GO:0010627	GO_BiologicalProcess_16.11.2010_17h17	regulation of intracellular protein kinase cascade	72	21.365	0.00874718	0.0271958	[ADIPOQ, AKAP12, ANGPT1, ARRB1, ARRB2, BMP4, C18orf32, CARD11, CD24, CD36, CNKSR3, DUSP3, ECM1, ECT2, EDA2R, ERBB2, FADD, FAM110A, FGF13, FGF9, FGFR1, FLNA, FZD7, GHR, GPR177, GRIK5, HRAS, ID1, IGF1, IKBKE, IL1B, ILK, KL, LPAR2, LPAR3, LTBR, MAP3K5, MAP3K6, MAPK8IP2, MDFI, PKN1, PRKCB, S100A7, S100A9, S100B, SDCBP, SFRP2, SH3RF1, SLC20A1, SLC35B2, SORBS3, SOX2, SQSTM1, TERF2IP, TGFBR1, TGM2, THBS…	[ADIPOQ, ADRA1A, ADRB2, ADRB3, AGXT, AIDA, AKAP12, AKAP5, AKAP7, AKT1, AKT2, AMBP, ANGPT1, ANKRD54, APC, APOL3, AREG, ARRB1, ARRB2, ATP2C1, ATP6AP2, AXIN1, BCL10, BIRC2, BIRC7, BMP4, BMPER, BRAF, BST2, BTRC, C11orf59, C18orf32, C9orf89, CANT1, CARD11, CARD8, CARD9, CASP1, CASP10, CASP8, CAV1, CAV3, CC2D1A, CD24, CD27, CD36, CD40, CD44, CD74, CFLAR, CHUK, CLCF1, CNKSR3, CNTF, CSF2, CTNNB1, CXXC5, …	[CARD11, CD24, ECT2, ERBB2, FADD, FAM110A, HRAS, ID1, IKBKE, LPAR2, LPAR3, LTBR, MAP3K5, MAPK8IP2, MDFI, S100A7, S100A9, SH3RF1, SLC20A1, SLC35B2, SOX2, TNFSF10, TP73, TRAF4, TSPAN6, UBD, ZDHHC13]	[ADIPOQ, AKAP12, ANGPT1, ARRB1, ARRB2, BMP4, C18orf32, CD36, CNKSR3, DUSP3, ECM1, EDA2R, FGF13, FGF9, FGFR1, FLNA, FZD7, GHR, GPR177, GRIK5, IGF1, IL1B, ILK, KL, MAP3K6, PKN1, PRKCB, S100B, SDCBP, SFRP2, SORBS3, SQSTM1, TERF2IP, TGFBR1, TGM2, THBS1, TIMP2, TNFAIP3, TPD52L1, TRAF5, TSC2, VEGFB, ZAK, ZDHHC17, ZEB2]	37.5	62.5	Common
GO:0048738	GO_BiologicalProcess_16.11.2010_17h17	cardiac muscle tissue development	18	29.0323	0.00865357	0.0272348	[ACTC1, CCNB1, CDC2, FHL2, FOXP1, GATA6, HAND1, LY6E, MYH11, OBSL1, PLN, RBP4, SMAD7, TBX5, TGFBR3, TNNT2, TPM1, VEGFA]	[ACTC1, ATG5, BMP10, BMP2, CBY1, CCNB1, CDC2, CSRP3, CXADR, DICER1, EGLN1, FHL2, FKBP1A, FOXC1, FOXC2, FOXP1, GAA, GATA6, GJD3, HAND1, LMNA, LY6E, MESP1, MKL2, MYBPC3, MYH11, MYH6, MYH7, MYL2, MYL3, MYLK2, NDUFV2, NKX2-5, NKX2-6, NRG1, OBSL1, PLN, PROX1, PTCD2, PTEN, RARB, RBP4, RXRA, SIN3B, SMAD7, TAZ, TBX2, TBX3, TBX5, TCAP, TDGF3, TGFB2, TGFBR3, TNNI3, TNNT2, TPM1, TSC1, TTN, VEGFA, WNT2, XIRP…	[CCNB1, CDC2, LY6E, VEGFA]	[ACTC1, FHL2, FOXP1, GATA6, HAND1, MYH11, OBSL1, PLN, RBP4, SMAD7, TBX5, TGFBR3, TNNT2, TPM1]	22.2222	77.7778	Specific for Cluster 2
GO:0051480	GO_BiologicalProcess_16.11.2010_17h17	cytosolic calcium ion homeostasis	31	25	0.00862781	0.0273214	[AGTR1, ATP1A2, BDKRB1, BDKRB2, CACNA1C, CCRL1, CD24, CNOT6, CXCL13, EDN2, EDNRA, GNA15, IL1B, ITPR1, ITPR3, JPH2, KCNA5, KCNK3, LPAR2, LPAR3, P2RY2, PKD2, RIC3, RYR2, S1PR3, SAA1, SLC8A1, TAC1, TGM2, TRPC1, TRPV4]	[ADM, ADRA1A, AGTR1, ATP1A2, AVP, AVPR1A, AVPR1B, BDKRB1, BDKRB2, C3AR1, C5AR1, CACNA1A, CACNA1C, CACNA1G, CALCA, CALCR, CAV1, CAV3, CCBP2, CCKAR, CCKBR, CCR1, CCR2, CCR3, CCR5, CCR6, CCR7, CCR8, CCRL1, CD24, CD38, CD52, CD55, CHRNA10, CHRNA9, CLN3, CNOT6, CUL5, CXCL13, CXCR3, CXCR4, CYSLTR1, DRD1, DRD2, EDN1, EDN2, EDNRA, ENC1, EPOR, F2, F2R, F2RL1, FKBP1B, FZD2, GALR2, GHRH, GHRL, GIPR, GLP1R, …	[CD24, CNOT6, CXCL13, EDN2, GNA15, ITPR3, LPAR2, LPAR3, P2RY2, SAA1, TAC1, TRPV4]	[AGTR1, ATP1A2, BDKRB1, BDKRB2, CACNA1C, CCRL1, EDNRA, IL1B, ITPR1, JPH2, KCNA5, KCNK3, PKD2, RIC3, RYR2, S1PR3, SLC8A1, TGM2, TRPC1]	38.7097	61.2903	Common
GO:0003206	GO_BiologicalProcess_16.11.2010_17h17	cardiac chamber morphogenesis	13	32.5	0.00893487	0.027612	[ADAMTS1, CPE, FHL2, GATA6, HAND1, LY6E, RBP4, SFRP2, SMAD7, TBX5, TGFBR3, TNNT2, TPM1]	[ADAMTS1, BMP10, CPE, EGLN1, FGFRL1, FHL2, FKBP1A, FOXC1, FOXC2, GAA, GATA4, GATA6, HAND1, IFT88, LY6E, MESP1, MYBPC3, MYH6, MYH7, MYL2, MYL3, NKX2-5, NPY2R, NPY5R, OVOL2, PROX1, PTCD2, RBM15, RBP4, RXRA, SEMA3C, SFRP2, SMAD7, TBX5, TGFBR3, TNNI3, TNNT2, TPM1, WNT11, WNT2]	[LY6E]	[ADAMTS1, CPE, FHL2, GATA6, HAND1, RBP4, SFRP2, SMAD7, TBX5, TGFBR3, TNNT2, TPM1]	7.69231	92.3077	Specific for Cluster 2
GO:0032386	GO_BiologicalProcess_16.11.2010_17h17	regulation of intracellular transport	27	25.7143	0.00930202	0.0284044	[AXIN2, BMP4, CDC2, CDH1, CRYAB, FLNA, FZD7, GNAQ, IL1B, JUP, MDFI, MXI1, PKIA, PKIG, POU5F1, PPP1R12A, RBPMS, RYR2, SLC25A23, SMAD3, TACC3, TGFB3, TGFBR1, THRA, TLR2, TXN, WWTR1]	[AAAS, ABCA2, AKAP1, AKAP5, AXIN1, AXIN2, BAMBI, BARD1, BCL3, BMP4, BMPR1A, CALM1, CAPN10, CD27, CDC2, CDH1, CDK5, CDKN2A, CRYAA, CRYAB, CYLD, EDA, EGF, EGFR, EMD, EP300, FAF1, FKBP1B, FLNA, FZD7, G3BP2, GCC2, GLI3, GNAQ, GOPC, GREM1, GSK3B, IL10, IL1B, JAK2, JUP, KHDRBS1, LACRT, MBTPS1, MDFI, MXI1, MYBPC3, MYLK2, NCBP2, NEDD4, NF1, NFKBIA, NFKBIB, NFKBIE, NFKBIL1, NFKBIL2, NLRP12, NLRP3, NUDT4, …	[CDC2, CDH1, JUP, MDFI, PKIA, POU5F1, SMAD3, TACC3, TLR2, TXN, WWTR1]	[AXIN2, BMP4, CRYAB, FLNA, FZD7, GNAQ, IL1B, MXI1, PKIG, PPP1R12A, RBPMS, RYR2, SLC25A23, TGFB3, TGFBR1, THRA]	40.7407	59.2593	Common
GO:0008016	GO_BiologicalProcess_16.11.2010_17h17	regulation of heart contraction	22	27.1605	0.00927697	0.0284975	[ADRB1, ATP1A2, CACNA1H, CTGF, DES, DMPK, EDN2, GNAO1, HDAC4, HSPB7, IRX5, KCNH2, PDE5A, PLN, RYR2, SLC8A1, SMAD7, TAC1, TH, THRA, TNNT2, TPM1]	[ADA, ADORA1, ADORA3, ADRA1A, ADRA1B, ADRA1D, ADRB1, ADRB2, ADRBK1, AGTR2, ATP1A2, ATP1A4, ATP2A2, AVPR1A, AVPR1B, CACNA1H, CAV3, CHRM2, CSRP3, CTGF, CYP2J2, DES, DMPK, DRD2, EDN1, EDN2, EDN3, EPAS1, FKBP1B, FOXN4, GAA, GJA1, GLP1R, GLRX3, GNAO1, HBEGF, HCN2, HCN4, HDAC4, HRC, HSPB7, IFNG, IL2, IRX5, JAK2, KCNE1, KCNE1L, KCNE2, KCNG2, KCNH2, KCNIP2, KCNJ12, KCNQ1, MYH6, MYH7, MYL3, MYL4, NKX2-5, …	[ADRB1, EDN2, IRX5, TAC1, TH]	[ATP1A2, CACNA1H, CTGF, DES, DMPK, GNAO1, HDAC4, HSPB7, KCNH2, PDE5A, PLN, RYR2, SLC8A1, SMAD7, THRA, TNNT2, TPM1]	22.7273	77.2727	Specific for Cluster 2
GO:0022612	GO_BiologicalProcess_16.11.2010_17h17	gland morphogenesis	22	27.1605	0.00927697	0.0284975	[BCL2, BMP4, CCL11, CDH1, CTNND1, ERBB2, ERBB3, ESR1, FGF7, FGFR1, FOXA1, GLI2, HOXA13, IGF1, NTN1, PGR, PTCH1, SLIT2, TGFB3, TGM2, TNNC1, TP63]	[AREG, BCL2, BMP4, BMP7, BSX, BTRC, CAV1, CCL11, CD44, CDH1, CSF1, CTNND1, CYP7B1, DAG1, EDA, EGFR, ELF3, ERBB2, ERBB3, ESR1, ESR2, FEM1B, FGF10, FGF7, FGFR1, FOXA1, FRS2, GDF7, GLI2, GLI3, HOXA13, HOXB13, HOXD13, IGF1, IGF1R, KGFLP1, KGFLP2, LAMA1, LAMA5, MBD4, NCOA3, NKX2-3, NKX3-1, NOG, NOTCH1, NRG3, NRP1, NTN1, PDGFB, PGR, PHB2, PLAG1, PLXNA1, PLXND1, PML, PROP1, PTCH1, RARG, ROBO1, SCRIB, SE…	[CDH1, CTNND1, ERBB2, ERBB3, FOXA1, TNNC1, TP63]	[BCL2, BMP4, CCL11, ESR1, FGF7, FGFR1, GLI2, HOXA13, IGF1, NTN1, PGR, PTCH1, SLIT2, TGFB3, TGM2]	31.8182	68.1818	Specific for Cluster 2
GO:0045941	GO_BiologicalProcess_16.11.2010_17h17	positive regulation of transcription	123	19.9029	0.00966034	0.0291515	[ACVR1, ACVRL1, AGRN, ARNT2, ARRB1, ATF7IP, ATXN1, ATXN7L3, BARX2, BCL11B, BMP3, BMP4, BMP6, CAMKK2, CCNA2, CCNE1, CDK7, CREB3L4, CREB5, DAB2, DDIT3, E2F1, EBF1, EBF3, EGR2, EHF, ESRRA, FGF13, FHL2, FOXA1, FOXA2, FOXF1, FOXF2, FOXJ2, FSTL3, FZD1, FZD4, FZD7, GATA6, GLI2, GLIS2, GRHL3, HAND1, HAND2, HDAC4, HHEX, HMGA1, HOXA13, IGF1, IHH, IKZF2, IL1B, ILK, INHBA, IRAK1, IRF6, JUN, KAT2B, KLF15, KLF…	[AATF, ABLIM3, ABRA, ACVR1, ACVR1B, ACVRL1, ADRB2, AFAP1L2, AGRN, AHR, AKIRIN2, AKT2, ALX1, ALX4, ANKRD49, APP, AREG, ARHGEF11, ARID1A, ARID1B, ARNT, ARNT2, ARNTL, ARRB1, ASCL1, ASF1A, ATF1, ATF4, ATF6, ATF7IP, ATOH1, ATXN1, ATXN7L3, AXIN1, BAMBI, BARX2, BAZ1B, BCL10, BCL11B, BCL3, BCL9L, BLM, BLOC1S2, BMP10, BMP15, BMP2, BMP3, BMP4, BMP6, BMP7, BPTF, BRCA1, BRPF1, BSX, C11orf9, C21orf33, CALCOCO…	[AGRN, ATF7IP, ATXN7L3, BARX2, BCL11B, BMP3, CCNA2, CCNE1, CDK7, CREB3L4, E2F1, EHF, ESRRA, FOXA1, FOXA2, GRHL3, HMGA1, IHH, IKZF2, INHBA, IRAK1, IRF6, KLF5, ONECUT2, PAX8, PAX9, PCBD1, POU2F1, POU5F1, PRKDC, PUS1, SEC14L2, SIX1, SIX2, SIX4, SMAD3, SMARCD1, SOX2, SOX4, TAF8, TLR2, TP53, TP63, TP73, VEGFA, WNT10A, WWTR1, ZBTB7B]	[ACVR1, ACVRL1, ARNT2, ARRB1, ATXN1, BMP4, BMP6, CAMKK2, CREB5, DAB2, DDIT3, EBF1, EBF3, EGR2, FGF13, FHL2, FOXF1, FOXF2, FOXJ2, FSTL3, FZD1, FZD4, FZD7, GATA6, GLI2, GLIS2, HAND1, HAND2, HDAC4, HHEX, HOXA13, IGF1, IL1B, ILK, JUN, KAT2B, KLF15, LPIN2, MEF2C, MEIS2, MEOX1, MITF, NFIC, NFIX, NOTCH4, NR4A1, NR4A3, NTF3, PBX1, PGR, PLAGL1, PPARGC1A, RASL11A, RBPJ, RORA, SMARCD3, SNAI1, SOX10, SOX17, …	39.0244	60.9756	Common
GO:0000902	GO_BiologicalProcess_16.11.2010_17h17	cell morphogenesis	71	21.3213	0.00962707	0.029223	[ANTXR1, APBB1, ATL1, BBS4, BCL11B, BCL2, BDNF, BMP4, BVES, CDK5R1, CELSR2, DAB2, DCLK1, DSCAML1, EFNA5, EGR2, EPB41L5, EPHA4, EPHA7, ERBB2, ERBB3, ETV4, FEZ1, FN1, FOXF2, FOXJ1, FZD7, GAS1, GAS7, GLI2, HOXA13, ID1, IHH, ILK, ISL2, ITGA1, LAMC1, LMNB2, LPPR4, MAP1B, MNX1, NDN, NES, NOTCH4, NRP2, NRXN1, NTF3, NTN1, ONECUT2, PIP5K1C, PRSS8, PRTFDC1, PTPRZ1, PVRL1, RAB3IP, ROBO3, S100B, SDC2, SEMA3B…	[ACTB, ADCY1, ADM, ADORA2A, AFG3L2, ALCAM, ALMS1, ALS2, AMELX, AMIGO1, ANTXR1, APBB1, APC, APOE, APP, ARHGEF2, ARL6, ARX, ATL1, ATOH1, ATP7A, B3GNT2, BAI1, BAIAP2, BBS1, BBS10, BBS2, BBS4, BBS5, BBS7, BCL11B, BCL2, BCL6, BDNF, BIN3, BMP2, BMP4, BMP7, BMPR1B, BVES, C1orf187, C21orf33, C22orf28, C2CD3, C5orf13, CABP4, CACNA1A, CACNA1F, CBY1, CCK, CCKAR, CDH4, CDK5, CDK5R1, CELSR2, CELSR3, CHRNB2, C…	[BCL11B, CDK5R1, CELSR2, EFNA5, EPHA4, ERBB2, ERBB3, ETV4, FOXJ1, ID1, IHH, ISL2, LMNB2, MNX1, ONECUT2, PRSS8, PTPRZ1, PVRL1, RAB3IP, SHROOM2, SIX2, SLC1A3, SLITRK6, VANGL2, WWTR1]	[ANTXR1, APBB1, ATL1, BBS4, BCL2, BDNF, BMP4, BVES, DAB2, DCLK1, DSCAML1, EGR2, EPB41L5, EPHA7, FEZ1, FN1, FOXF2, FZD7, GAS1, GAS7, GLI2, HOXA13, ILK, ITGA1, LAMC1, LPPR4, MAP1B, NDN, NES, NOTCH4, NRP2, NRXN1, NTF3, NTN1, PIP5K1C, PRTFDC1, ROBO3, S100B, SDC2, SEMA3B, SLIT2, SLIT3, SNAI1, SPON2, TGFBR3, VASP]	35.2113	64.7887	Common
GO:0006006	GO_BiologicalProcess_16.11.2010_17h17	glucose metabolic process	35	24.1379	0.0097511	0.0292533	[ADIPOQ, ATF3, CREM, CRYAB, DHTKD1, ENO1, ENO2, EPM2A, FBP1, GAPDH, GPD2, GYG1, GYG2, HIBADH, HOOK1, KIF2A, LDHA, PDHA1, PDK3, PDK4, PFKL, PGD, PGK1, PGLS, PGM5, PKM2, PPARGC1A, PPP1CA, PPP1R1A, PPP1R3B, PRKAG2, PYGB, PYGM, RBP4, RPIA]	[ADIPOQ, ADPGK, AGL, AKR1A1, ALDH5A1, ALDOA, ALDOB, ALDOC, ATF3, ATF4, BAD, BPGM, BRS3, CACNA1A, CPT1A, CREM, CRYAB, CYP21A2, DCXR, DHTKD1, DLAT, ENO1, ENO2, ENO3, EPM2A, FBP1, FBP2, G6PC, G6PC2, G6PC3, GAA, GALT, GAPDH, GAPDHS, GBE1, GHRL, GNMT, GPD1, GPD2, GPI, GPT, GSK3B, GYG1, GYG2, GYS1, GYS2, H6PD, HIBADH, HKDC1, HOOK1, HOOK3, IGF2, IL6ST, INPPL1, INS, IRS2, KCNJ11, KIF2A, LDHA, LDHAL6A, LD…	[DHTKD1, ENO1, FBP1, GAPDH, GPD2, HOOK1, KIF2A, LDHA, PDHA1, PDK3, PFKL, PGD, PGK1, PGLS, PKM2, PPP1CA, RPIA]	[ADIPOQ, ATF3, CREM, CRYAB, ENO2, EPM2A, GYG1, GYG2, HIBADH, PDK4, PGM5, PPARGC1A, PPP1R1A, PPP1R3B, PRKAG2, PYGB, PYGM, RBP4]	48.5714	51.4286	Common
GO:0060284	GO_BiologicalProcess_16.11.2010_17h17	regulation of cell development	60	21.8182	0.0101299	0.0302129	[AGRN, ASCL2, ASPM, AXIN2, BCL2, BDNF, BMP4, BMP6, BOC, CCND2, CDC20, CDK5R1, DPYSL2, EPB41L5, EYA1, FEZ1, FGF13, FOXA1, FOXA2, FREQ, GLI2, HDAC4, HOXA11, IGFBP3, ILK, ISL2, MAP1B, MAPT, NLGN1, NOTCH4, NTF3, NTN1, NTRK3, P2RY2, PBX1, PLXNB1, RTN4, S1PR5, SEMA3F, SERPINF1, SFRP2, SIPA1L1, SIX1, SLIT2, SLIT3, SMAD3, SMAD7, SNAI1, SOX2, SPP1, TGFB1I1, TGFB3, THRA, TIMP2, TNFRSF12A, TP53, WWTR1, XRCC…	[ACSL6, ACTR3, ADNP, ADRA2B, ADRA2C, AGRN, AKAP5, AKT1, AMIGO1, ANAPC2, APOE, ARHGDIA, ARHGEF1, ARTN, ASCL1, ASCL2, ASPM, ATF1, ATF5, ATN1, ATOH1, AXIN2, B4GALT1, BAMBI, BARHL2, BAX, BCL2, BCL9L, BDNF, BMP2, BMP4, BMP6, BMP7, BMPR1A, BOC, BTG1, C21orf33, C5orf13, CACNA1A, CALR, CASP6, CAV3, CCDC88A, CCND2, CDC20, CDH2, CDH4, CDK5R1, CDK5RAP1, CDK5RAP2, CDK5RAP3, CHRNA3, CHRNB2, CITED1, CNTF, CNTN…	[AGRN, ASCL2, ASPM, CDC20, CDK5R1, FOXA1, FOXA2, IGFBP3, ISL2, P2RY2, PLXNB1, S1PR5, SEMA3F, SIPA1L1, SIX1, SMAD3, SOX2, SPP1, TP53, WWTR1, XRCC5, ZNF488]	[AXIN2, BCL2, BDNF, BMP4, BMP6, BOC, CCND2, DPYSL2, EPB41L5, EYA1, FEZ1, FGF13, FREQ, GLI2, HDAC4, HOXA11, ILK, MAP1B, MAPT, NLGN1, NOTCH4, NTF3, NTN1, NTRK3, PBX1, RTN4, SERPINF1, SFRP2, SLIT2, SLIT3, SMAD7, SNAI1, TGFB1I1, TGFB3, THRA, TIMP2, TNFRSF12A, XYLT1]	36.6667	63.3333	Common
GO:0030216	GO_BiologicalProcess_16.11.2010_17h17	keratinocyte differentiation	18	28.5714	0.0103073	0.0305645	[CASP3, CLIC4, CNFN, CSTA, EREG, EVPL, IRF6, IVL, POU3F1, S100A7, SFN, SPRR1A, SPRR1B, SPRR2D, SPRR2E, SPRR2F, SPRR3, TGM1]	[ADAM9, ANXA1, CASP3, CDSN, CLIC4, CNFN, CSTA, DSPP, EREG, EVPL, FLG, FOXN1, HRNR, IRF6, IVL, JAG1, KRT2, LCE1A, LCE1B, LCE1C, LCE1D, LCE1E, LCE1F, LCE2A, LCE2B, LCE2C, LCE2D, LCE3A, LCE3B, LCE3C, LCE3D, LCE3E, LCE4A, LCE5A, LCE6A, LOR, MADCAM1, MAP2K1, POU2F3, POU3F1, PPHLN1, PPL, S100A7, SCEL, SFN, SHARPIN, SPRR1A, SPRR1B, SPRR2A, SPRR2B, SPRR2D, SPRR2E, SPRR2F, SPRR2G, SPRR3, SPRR4, TCHH, TGM1…	[CASP3, CNFN, CSTA, EREG, EVPL, IRF6, IVL, POU3F1, S100A7, SFN, SPRR1A, SPRR1B, SPRR2D, SPRR2E, SPRR2F, SPRR3, TGM1]	[CLIC4]	94.4444	5.55556	Specific for Cluster 1
GO:0008629	GO_BiologicalProcess_16.11.2010_17h17	induction of apoptosis by intracellular signals	16	29.6296	0.0105134	0.0309963	[ABL1, AEN, ATM, CASP3, CD24, CIDEA, IKBKE, MLH1, MSH2, PRODH, RYR2, SFN, TP53, TP53I3, TP63, TP73]	[ABL1, AEN, AIFM1, ATM, BAX, BCL3, BRCA1, BRCA2, C16orf5, CASP3, CD24, CHEK2, CIDEA, CIDEB, CUL1, CUL2, CUL3, CUL4A, CUL5, DIABLO, DYRK2, ERCC6, GPX1, HIPK1, HIPK2, HTRA2, IFI16, IKBKE, JAK2, LGALS12, MBD4, MLH1, MSH2, MSH6, NOL3, PAK3, PHLDA3, PML, PPP2R5C, PRKCA, PRODH, RNF7, RPS27L, RYR2, SART1, SFN, TOPORS, TP53, TP53I3, TP63, TP73, UACA, USP28, XPA]	[CASP3, CD24, IKBKE, MSH2, PRODH, SFN, TP53, TP53I3, TP63, TP73]	[ABL1, AEN, ATM, CIDEA, MLH1, RYR2]	62.5	37.5	Common
GO:0001701	GO_BiologicalProcess_16.11.2010_17h17	in utero embryonic development	50	22.4215	0.0106871	0.0313286	[ACVR1, ACVRL1, ANGPT1, ARNT2, ASCL2, BCL2L11, C5, CCNB1, CCNB2, CDH1, CHD7, CYR61, DAB2, EDNRA, EPB41L5, FGFR1, FOXA2, GATA6, GINS1, GJB3, GJB5, GLI2, GNA12, HAND1, HAND2, JAG2, KRT19, LY6E, MBNL1, MDFI, MSH2, NSDHL, PDGFRB, PKD1, PKD2, PLK4, PTPRR, SLIT2, SMAD3, SNAI1, SOX10, SOX18, SPINT1, SRF, TFEB, TGFB3, TGFBR1, TP53, TSHZ3, VEGFA]	[ACVR1, ACVR1B, ACVRL1, ADA, ADAM10, ADM, AKT1, ALKBH1, ALS2, AMOT, ANGPT1, ANKRD11, APBA1, APBA2, APBA3, APOB, AREG, ARNT, ARNT2, ARTN, ASCL2, BCL2L1, BCL2L11, BIRC6, BMP2, BMPR1A, BPTF, BRCA2, C21orf33, C2CD3, C5, C6, CAPN2, CCNB1, CCNB1IP1, CCNB2, CDH1, CDX2, CDX4, CEBPA, CEBPB, CHD7, CHD8, CITED1, COL4A3BP, COPS3, COQ7, CSDA, CTNNB1, CUBN, CUL3, CYR61, DAB2, DAD1, DNAJB6, DNMT3L, DPEP3, EDN1,…	[ASCL2, BCL2L11, CCNB1, CCNB2, CDH1, CHD7, FOXA2, GINS1, GJB3, GJB5, JAG2, KRT19, LY6E, MDFI, MSH2, NSDHL, PLK4, PTPRR, SMAD3, SPINT1, TP53, VEGFA]	[ACVR1, ACVRL1, ANGPT1, ARNT2, C5, CYR61, DAB2, EDNRA, EPB41L5, FGFR1, GATA6, GLI2, GNA12, HAND1, HAND2, MBNL1, PDGFRB, PKD1, PKD2, SLIT2, SNAI1, SOX10, SOX18, SRF, TFEB, TGFB3, TGFBR1, TSHZ3]	44	56	Common
GO:0090257	GO_BiologicalProcess_16.11.2010_17h17	regulation of muscle system process	22	26.8293	0.0107695	0.0313906	[ADORA2B, ANXA6, ATP1A2, CHRM3, CNN1, CTGF, DMPK, EDN2, HDAC4, ITGA2, LMCD1, MYL9, NMU, P2RX1, PPP1R12B, PTGS1, RYR2, SMAD7, SRF, TNNT1, TNNT3, TPM1]	[ADA, ADORA2B, ADRA1A, ADRA2B, ADRB2, ADRBK1, AGXT, AKAP1, ANXA6, ARG2, ATP1A2, ATP1A4, ATP2A1, BMP10, CALCRL, CAV1, CAV3, CHRM2, CHRM3, CHRNA3, CHRNB4, CNN1, CTGF, DMPK, EDN1, EDN2, F2R, FKBP1B, FLT1, GHSR, GLRX3, HDAC4, IL6ST, ITGA2, KCNB2, LMCD1, MAP2K1, MGEA5, MSTN, MYBPC3, MYBPH, MYL2, MYL3, MYL5, MYL9, MYLK2, MYOCD, NCF1B, NKX2-5, NMS, NMU, NMUR2, NOS1, NOS3, OXT, OXTR, P2RX1, P2RX4, PLCE1,…	[ADORA2B, EDN2, ITGA2, NMU, TNNT1]	[ANXA6, ATP1A2, CHRM3, CNN1, CTGF, DMPK, HDAC4, LMCD1, MYL9, P2RX1, PPP1R12B, PTGS1, RYR2, SMAD7, SRF, TNNT3, TPM1]	22.7273	77.2727	Specific for Cluster 2
GO:0048562	GO_BiologicalProcess_16.11.2010_17h17	embryonic organ morphogenesis	35	23.9726	0.0108614	0.0314796	[BMP4, CHD7, DSCAML1, EYA1, FGF9, FGFR1, GAS1, GJB6, GLI2, HOXB3, HOXB4, HOXB5, HOXB6, HOXB7, HOXB8, IHH, MDFI, NR4A3, OSR2, PRRX1, RBP4, RORA, SIX1, SIX2, SIX4, SMAD3, SOBP, SOX2, TBX1, TCF21, TFAP2A, TGFB3, TGFBR1, TH, ZEB1]	[ALDH1A3, ALX1, ALX3, ALX4, ATOH1, AXIN1, BMP4, BMP7, CEP290, CHD7, CHRNA10, CHRNA9, CHST11, CLIC5, COL2A1, CRYAA, DLX5, DLX6, DSCAML1, EDN1, EFNA1, EPHA2, EYA1, FGF10, FGF9, FGFR1, FOXC2, FOXE1, FOXE3, FOXG1, FOXI1, FOXI2, FOXI3, FOXL2, FRS2, FRZB, FZD6, FZD9, GAS1, GBX2, GFPT1, GJB6, GLI1, GLI2, GLI3, GNAS, GSC, HESX1, HMX2, HMX3, HOXA1, HOXA2, HOXA3, HOXA4, HOXA5, HOXA6, HOXA7, HOXB1, HOXB2, H…	[CHD7, GJB6, HOXB3, HOXB4, HOXB5, HOXB6, HOXB7, HOXB8, IHH, MDFI, SIX1, SIX2, SIX4, SMAD3, SOX2, TBX1, TFAP2A, TH]	[BMP4, DSCAML1, EYA1, FGF9, FGFR1, GAS1, GLI2, NR4A3, OSR2, PRRX1, RBP4, RORA, SOBP, TCF21, TGFB3, TGFBR1, ZEB1]	51.4286	48.5714	Common
GO:0010553	GO_BiologicalProcess_16.11.2010_17h17	negative regulation of gene-specific transcription from RNA polymerase II promoter	20	27.3973	0.0115457	0.0332749	[ASCL2, BMP4, FOXF1, FOXF2, FOXJ1, GATA6, HAND1, HDAC4, HEY1, HHEX, MEF2C, NFIC, NFIX, PER1, PER2, SMAD3, SMAD7, TBL1X, TIMELESS, TP53]	[AES, ASCL2, BCOR, BMP2, BMP4, C21orf33, CAV1, CIITA, CTNNBIP1, ENG, FOXF1, FOXF2, FOXJ1, FOXO3, GATA6, GFI1, GPS2, HAND1, HDAC1, HDAC2, HDAC3, HDAC4, HDAC5, HDAC9, HES3, HES5, HEY1, HEY2, HHEX, HNF1B, IGBP1, IKZF1, KAT5, MEF2C, NCOR1, NCOR2, NFIC, NFIX, NFKB1, NIPBL, NKX2-5, NOL3, NR1D1, NR1H2, PER1, PER2, POU4F1, PPARA, PPARG, PSMD10, RBM15, RXRA, SHH, SKIL, SMAD3, SMAD7, SMARCA2, SMARCA4, SMO,…	[ASCL2, FOXJ1, HEY1, SMAD3, TIMELESS, TP53]	[BMP4, FOXF1, FOXF2, GATA6, HAND1, HDAC4, HHEX, MEF2C, NFIC, NFIX, PER1, PER2, SMAD7, TBL1X]	30	70	Specific for Cluster 2
GO:0030003	GO_BiologicalProcess_16.11.2010_17h17	cellular cation homeostasis	56	21.875	0.0120055	0.0344068	[AGTR1, ATP1A2, ATP7B, BCL2, BDKRB1, BDKRB2, C7, CACNA1C, CCL11, CCL2, CCRL1, CD24, CNOT6, CP, CXCL12, CXCL13, EDN2, EDNRA, EPHX2, FXYD1, GNA15, GRIK5, IL1B, ITPR1, ITPR3, JPH2, KCNA5, KCNK3, LCN2, LPAR2, LPAR3, MFI2, P2RY2, PGM5, PKD2, PLN, PYGM, RGN, RIC3, RYR2, RYR3, S1PR3, SAA1, SCARA5, SCO2, SLC22A17, SLC24A3, SLC39A4, SLC4A11, SLC8A1, SYPL2, TAC1, TFRC, TGM2, TRPC1, TRPV4]	[ABCB6, ABCB7, ADM, ADRA1A, AGTR1, AGXT, ALAS2, ANXA7, APOE, APP, AQP11, ASNA1, ATOX1, ATP1A2, ATP1A4, ATP2A1, ATP2A2, ATP2C1, ATP5B, ATP6V0E1, ATP6V0E2, ATP6V1H, ATP7A, ATP7B, AVP, AVPR1A, AVPR1B, BCL2, BDKRB1, BDKRB2, C3AR1, C5AR1, C7, CACNA1A, CACNA1C, CACNA1F, CACNA1G, CACNB4, CALCA, CALCB, CALCR, CALR, CASR, CAV1, CAV3, CBARA1, CCBP2, CCKAR, CCKBR, CCL1, CCL11, CCL13, CCL14, CCL15, CCL19, CC…	[ATP7B, CD24, CNOT6, CP, CXCL13, EDN2, GNA15, ITPR3, LCN2, LPAR2, LPAR3, MFI2, P2RY2, SAA1, SCO2, SLC39A4, SLC4A11, TAC1, TFRC, TRPV4]	[AGTR1, ATP1A2, BCL2, BDKRB1, BDKRB2, C7, CACNA1C, CCL11, CCL2, CCRL1, CXCL12, EDNRA, EPHX2, FXYD1, GRIK5, IL1B, ITPR1, JPH2, KCNA5, KCNK3, PGM5, PKD2, PLN, PYGM, RGN, RIC3, RYR2, RYR3, S1PR3, SCARA5, SLC22A17, SLC24A3, SLC8A1, SYPL2, TGM2, TRPC1]	35.7143	64.2857	Common
GO:0001933	GO_BiologicalProcess_16.11.2010_17h17	negative regulation of protein phosphorylation	14	30.4348	0.0126544	0.0360652	[BDKRB1, BDKRB2, CCNB1, CNKSR3, ENPP1, FAM129A, IGFBP3, JUN, PPAP2B, PRKCZ, SFRP2, SLIT2, SMAD3, SMAD7]	[BDKRB1, BDKRB2, CAV1, CCNB1, CNKSR3, DUSP6, ENG, ENPP1, ERRFI1, FAM129A, IBTK, IGFBP3, IL2, INPP5J, INPP5K, INSR, JUN, LRP6, MAS1, MEN1, MLXIPL, NF2, NLRP12, PARK2, PEBP1, PPAP2B, PPP2CA, PPP2R1A, PRKCA, PRKCD, PRKCZ, PSEN1, PSEN2, PTEN, PTPN6, PTPRC, SFRP1, SFRP2, SLIT2, SMAD3, SMAD6, SMAD7, SOCS1, TAZ, TGFB1, UBE2B]	[CCNB1, IGFBP3, PRKCZ, SMAD3]	[BDKRB1, BDKRB2, CNKSR3, ENPP1, FAM129A, JUN, PPAP2B, SFRP2, SLIT2, SMAD7]	28.5714	71.4286	Specific for Cluster 2
GO:0048534	GO_BiologicalProcess_16.11.2010_17h17	hemopoietic or lymphoid organ development	59	21.6117	0.0130183	0.0366945	[ANGPT1, ATM, BCL11A, BCL11B, BCL2, BCL2L11, BMP4, CARD11, CCNB2, CD79A, CDC42, CDKN2B, CHD7, CSF3, FOXP1, FSTL3, GPR183, HDAC4, HHEX, HOXB3, HOXB4, HOXB7, INHBA, ITPKB, JAG2, KITLG, LY6D, MMP9, MSH2, NCKAP1L, NOTCH2, NOTCH4, PATZ1, PBX1, PRKDC, RTKN2, SATB1, SFRP2, SFXN1, SGPL1, SH2B3, SIX1, SIX4, SNRK, SOX4, STAT5B, TACC3, TBX1, TCF21, TGFBR1, TGFBR3, THRA, TP53, TPD52, UBD, VEGFA, WNT2B, XRCC5…	[ACE, ACIN1, ADA, ADAM17, ADD2, AICDA, ALAS2, ANGPT1, ANXA1, APC, ARIH2, ASH2L, ATM, ATP7A, BARX1, BCL11A, BCL11B, BCL2, BCL2L11, BCL3, BCL6, BLM, BLNK, BMI1, BMP4, BPGM, BRCA2, CACNB4, CALCR, CARD11, CASP8, CBFA2T3, CCNB2, CD164, CD1D, CD28, CD3D, CD3E, CD4, CD40LG, CD74, CD79A, CD8A, CDC42, CDK6, CDKN2B, CEBPA, CEBPE, CEBPG, CHD7, CHUK, CIAPIN1, CLCF1, CRKL, CSF1, CSF2, CSF3, CTNNB1, CXCR5, DCL…	[BCL11A, BCL11B, BCL2L11, CARD11, CCNB2, CDC42, CHD7, CSF3, HOXB3, HOXB4, HOXB7, INHBA, JAG2, LY6D, MMP9, MSH2, PATZ1, PRKDC, RTKN2, SFXN1, SGPL1, SIX1, SIX4, SOX4, TACC3, TBX1, TP53, TPD52, UBD, VEGFA, XRCC5]	[ANGPT1, ATM, BCL2, BMP4, CD79A, CDKN2B, FOXP1, FSTL3, GPR183, HDAC4, HHEX, ITPKB, KITLG, NCKAP1L, NOTCH2, NOTCH4, PBX1, SATB1, SFRP2, SH2B3, SNRK, STAT5B, TCF21, TGFBR1, TGFBR3, THRA, WNT2B, ZBTB16]	52.5424	47.4576	Common
GO:0001932	GO_BiologicalProcess_16.11.2010_17h17	regulation of protein phosphorylation	52	22.0339	0.0131397	0.0368342	[ADIPOQ, ANGPT1, AXIN2, BCL2, BDKRB1, BDKRB2, BMP4, BMP6, CCNB1, CCND1, CCND2, CNKSR3, CTGF, DAB2, EDNRA, ENPP1, FAM129A, FGF13, FGF7, FZD1, GHR, IGF1, IGFBP3, IL1B, ITGA5, JUN, KITLG, MAP3K5, MAP3K6, MDFI, PDGFRB, PKN1, PPAP2B, PRKAG2, PRKAR2B, PRKCZ, RBPMS, S100A9, SFRP2, SLIT2, SMAD3, SMAD7, TGFB3, TGFBR1, THBS4, TP53, TP73, TTK, VEGFA, VEGFB, ZAK, ZEB2]	[ACVR1B, ADAM17, ADIPOQ, ADNP, AGXT, AIDA, AKAP5, AKT2, AKTIP, ANGPT1, ANGPT4, APOA1, ARR3, ARTN, AXIN1, AXIN2, BCL2, BDKRB1, BDKRB2, BIRC7, BMP10, BMP2, BMP4, BMP6, BMP7, BMPER, BMPR1A, BMPR2, CAMP, CARD14, CAV1, CCDC88A, CCDC88C, CCK, CCNB1, CCND1, CCND2, CCND3, CD3E, CD4, CD44, CD6, CD74, CD80, CD81, CLCF1, CNKSR3, CNTF, CRYAA, CSF2, CSNK1D, CTGF, DAB2, DAXX, DBNL, DOCK7, DUSP6, DVL2, DVL3, ED…	[CCNB1, CCND1, IGFBP3, MAP3K5, MDFI, PRKCZ, S100A9, SMAD3, TP53, TP73, TTK, VEGFA]	[ADIPOQ, ANGPT1, AXIN2, BCL2, BDKRB1, BDKRB2, BMP4, BMP6, CCND2, CNKSR3, CTGF, DAB2, EDNRA, ENPP1, FAM129A, FGF13, FGF7, FZD1, GHR, IGF1, IL1B, ITGA5, JUN, KITLG, MAP3K6, PDGFRB, PKN1, PPAP2B, PRKAG2, PRKAR2B, RBPMS, SFRP2, SLIT2, SMAD7, TGFB3, TGFBR1, THBS4, VEGFB, ZAK, ZEB2]	23.0769	76.9231	Specific for Cluster 2
GO:0055080	GO_BiologicalProcess_16.11.2010_17h17	cation homeostasis	62	21.4533	0.0130014	0.0368494	[AGTR1, ATP1A2, ATP7B, BCL2, BDKRB1, BDKRB2, C7, CACNA1C, CCL11, CCL2, CCRL1, CD24, CNOT6, CP, CUTC, CXCL12, CXCL13, EDN2, EDNRA, EPHX2, FXYD1, GNA15, GRIK5, IL1B, ITPR1, ITPR3, JPH2, KCNA5, KCNK3, LCN2, LPAR2, LPAR3, MFI2, P2RY2, PGM5, PKD2, PLN, PYGM, RGN, RHCG, RIC3, RYR2, RYR3, S1PR3, SAA1, SCARA5, SCO2, SLC22A17, SLC24A3, SLC39A4, SLC4A11, SLC8A1, SLC9A1, SLC9A2, SLC9A9, SYPL2, TAC1, TFRC, T…	[ABCB6, ABCB7, ADM, ADRA1A, AGTR1, AGXT, ALAS2, ANXA7, APOE, APP, AQP11, ASNA1, ATOX1, ATP1A2, ATP1A4, ATP2A1, ATP2A2, ATP2C1, ATP4A, ATP5B, ATP6V0A4, ATP6V0E1, ATP6V0E2, ATP6V1B1, ATP6V1H, ATP7A, ATP7B, AVP, AVPR1A, AVPR1B, BCL2, BDH2, BDKRB1, BDKRB2, C3AR1, C5AR1, C7, CACNA1A, CACNA1C, CACNA1F, CACNA1G, CACNB4, CALCA, CALCB, CALCR, CALR, CASR, CAV1, CAV3, CBARA1, CCBP2, CCDC47, CCKAR, CCKBR, CC…	[ATP7B, CD24, CNOT6, CP, CXCL13, EDN2, GNA15, ITPR3, LCN2, LPAR2, LPAR3, MFI2, P2RY2, RHCG, SAA1, SCO2, SLC39A4, SLC4A11, SLC9A1, SLC9A2, TAC1, TFRC, TRIM24, TRPV4]	[AGTR1, ATP1A2, BCL2, BDKRB1, BDKRB2, C7, CACNA1C, CCL11, CCL2, CCRL1, CUTC, CXCL12, EDNRA, EPHX2, FXYD1, GRIK5, IL1B, ITPR1, JPH2, KCNA5, KCNK3, PGM5, PKD2, PLN, PYGM, RGN, RIC3, RYR2, RYR3, S1PR3, SCARA5, SLC22A17, SLC24A3, SLC8A1, SLC9A9, SYPL2, TGM2, TRPC1]	38.7097	61.2903	Common
GO:0031324	GO_BiologicalProcess_16.11.2010_17h17	negative regulation of cellular metabolic process	160	19.2077	0.0133322	0.0371709	[A2M, ADIPOQ, ADRA2A, ANAPC10, ANG, ANTXR1, ARID5A, ARID5B, ARRB1, ARRB2, ASCL2, ATF7IP, ATXN1, BARX2, BCL6B, BDKRB1, BDKRB2, BMP4, BUB1B, CCNB1, CDC20, CDC45L, CDC6, CDKN2B, CDT1, CENPF, CNKSR3, COMT, CRYM, DAB2, DEDD2, DKK3, DNAJB5, E2F1, EDNRA, ENO1, ENPP1, ERCC4, EREG, FAM129A, FBXO5, FGF13, FOXA1, FOXF1, FOXF2, FOXJ1, FOXN3, FOXP1, FURIN, FZD1, GATA6, GATAD2A, GLI2, GLIS2, GMNN, HAND1, HDAC4…	[A2M, AATF, ACADL, ACADVL, ACD, ACP5, ADIPOQ, ADRA1B, ADRA2A, AES, AIFM2, AKAP1, AKIRIN2, AKT1, AKT2, ALX1, ANAPC1, ANAPC10, ANAPC11, ANAPC2, ANAPC4, ANAPC5, ANAPC7, ANG, ANTXR1, APLP1, APOA4, APOC1, APOC3, APOM, ARID4A, ARID5A, ARID5B, ARRB1, ARRB2, ASAH3L, ASB1, ASCL1, ASCL2, ATF7IP, ATG5, ATN1, ATP1A4, ATP8B1, ATPIF1, ATXN1, AXIN1, BACE2, BAG5, BAHD1, BARD1, BARX2, BASP1, BAZ2A, BCL3, BCL6, BC…	[ANAPC10, ASCL2, ATF7IP, BARX2, BUB1B, CCNB1, CDC20, CDC45L, CDC6, CDT1, CENPF, COMT, DEDD2, E2F1, ENO1, EREG, FBXO5, FOXA1, FOXJ1, FURIN, GATAD2A, GMNN, HELLS, HES2, HEY1, HOXB4, HSBP1, ID1, IGF2BP2, IGF2BP3, IGFBP3, INHBA, LCOR, MAD2L1, MDFI, MSH2, NACC1, NPM1, NR2F6, PAX9, PKIA, POU2F1, PRKCZ, PSMA4, PSMA5, PSMB2, PSMB3, PSMD11, PSMD2, PSME2, PTPRU, RNF128, S100A11, S100A9, SCGB1A1, SIRT6, SMA…	[A2M, ADIPOQ, ADRA2A, ANG, ANTXR1, ARID5A, ARID5B, ARRB1, ARRB2, ATXN1, BCL6B, BDKRB1, BDKRB2, BMP4, CDKN2B, CNKSR3, CRYM, DAB2, DKK3, DNAJB5, EDNRA, ENPP1, ERCC4, FAM129A, FGF13, FOXF1, FOXF2, FOXN3, FOXP1, FZD1, GATA6, GLI2, GLIS2, HAND1, HDAC4, HHEX, ID3, IGFBP5, JAZF1, JDP2, JUN, KLF10, KLF4, LDB2, LMCD1, LRRFIP1, MASP1, MEF2C, MEIS2, MLH1, NFIC, NFIX, NR2F1, PALM, PBXIP1, PER1, PER2, PEX14, …	43.125	56.875	Common
GO:0031401	GO_BiologicalProcess_16.11.2010_17h17	positive regulation of protein modification process	54	21.8623	0.0135919	0.0376899	[ADIPOQ, ANAPC10, ANGPT1, ARRB1, AXIN2, BCL2, BMP4, BMP6, CCNB1, CCND1, CCND2, CDC2, CDC20, CTGF, DAB2, EDNRA, FAM129A, FBXO5, FGF13, FGF7, FZD1, GHR, HDAC4, HSPA5, IGF1, IL1B, ITGA5, KITLG, LRRK2, PLK1, PPARGC1A, PRICKLE1, PRKAG2, PSMA4, PSMA5, PSMB2, PSMB3, PSMD11, PSMD12, PSMD2, PSME2, RBPMS, S100A9, SMAD7, SMURF1, TBC1D7, TGFB3, TGFBR1, THBS4, TP53, TRIB3, TTK, VEGFA, VEGFB]	[ACVR1B, ADAM17, ADIPOQ, ADNP, ADORA1, AGXT, AKAP5, AKT2, AKTIP, ANAPC1, ANAPC10, ANAPC11, ANAPC2, ANAPC4, ANAPC5, ANAPC7, ANGPT1, ANGPT4, ARNT, ARRB1, ARTN, ATG10, ATG7, AXIN1, AXIN2, BCL10, BCL2, BMI1, BMP10, BMP2, BMP4, BMP6, BMP7, BMPR1A, BMPR2, BRCA1, BTRC, CAMP, CARD14, CAV1, CCK, CCNB1, CCND1, CCND2, CCND3, CD3E, CD4, CD44, CD74, CD80, CD81, CDC14B, CDC16, CDC2, CDC20, CDC23, CDC26, CDC27,…	[ANAPC10, CCNB1, CCND1, CDC2, CDC20, FBXO5, HSPA5, PLK1, PSMA4, PSMA5, PSMB2, PSMB3, PSMD11, PSMD2, PSME2, S100A9, SMURF1, TBC1D7, TP53, TRIB3, TTK, VEGFA]	[ADIPOQ, ANGPT1, ARRB1, AXIN2, BCL2, BMP4, BMP6, CCND2, CTGF, DAB2, EDNRA, FAM129A, FGF13, FGF7, FZD1, GHR, HDAC4, IGF1, IL1B, ITGA5, KITLG, LRRK2, PPARGC1A, PRICKLE1, PRKAG2, PSMD12, RBPMS, SMAD7, TGFB3, TGFBR1, THBS4, VEGFB]	40.7407	59.2593	Common
GO:0070372	GO_BiologicalProcess_16.11.2010_17h17	regulation of ERK1 and ERK2 cascade	13	30.9524	0.0138099	0.0380886	[ANGPT1, ARRB1, ARRB2, BMP4, CNKSR3, DUSP3, FGF13, HRAS, IGF1, IL1B, S100A7, S100A9, VEGFB]	[ADRA1A, ANGPT1, ARRB1, ARRB2, BMP4, BMPER, BRAF, CD44, CD74, CNKSR3, DCC, DUSP3, DUSP6, FGF10, FGF13, FGF18, FGF19, FGF21, FGF23, FGF4, GPR55, HRAS, IGF1, IL1A, IL1B, IL26, LIF, NOD1, NOD2, RIPK2, S100A7, S100A9, SPRY1, SPRY2, ST5, TEK, TLR4, TNF, TNFRSF11A, TNFSF11, VEGFB, VRK3]	[HRAS, S100A7, S100A9]	[ANGPT1, ARRB1, ARRB2, BMP4, CNKSR3, DUSP3, FGF13, IGF1, IL1B, VEGFB]	23.0769	76.9231	Specific for Cluster 2
GO:0006007	GO_BiologicalProcess_16.11.2010_17h17	glucose catabolic process	15	29.4118	0.0139515	0.0382734	[DHTKD1, ENO1, ENO2, GAPDH, HIBADH, HOOK1, KIF2A, LDHA, PDHA1, PFKL, PGD, PGK1, PGLS, PKM2, RPIA]	[ADPGK, ALDOA, ALDOB, ALDOC, BAD, BPGM, DHTKD1, DLAT, ENO1, ENO2, ENO3, GAPDH, GPI, H6PD, HIBADH, HKDC1, HOOK1, HOOK3, KIF2A, LDHA, LDHAL6A, LDHAL6B, LDHB, LDHC, LRP5, MDH1, MDH2, OGDH, OGDHL, PDHA1, PDHA2, PDHB, PFKFB1, PFKFB2, PFKL, PFKM, PFKP, PGAM2, PGAM4, PGD, PGK1, PGK2, PGLS, PKLR, PKM2, RPIA, TALDO1, TKTL1, TPI1, UBL4A, UEVLD]	[DHTKD1, ENO1, GAPDH, HOOK1, KIF2A, LDHA, PDHA1, PFKL, PGD, PGK1, PGLS, PKM2, RPIA]	[ENO2, HIBADH]	86.6667	13.3333	Specific for Cluster 1
GO:0010563	GO_BiologicalProcess_16.11.2010_17h17	negative regulation of phosphorus metabolic process	18	27.6923	0.014364	0.0391955	[ATXN1, BDKRB1, BDKRB2, BMP4, CCNB1, CDKN2B, CNKSR3, ENPP1, FAM129A, IGFBP3, INHBA, JUN, PPAP2B, PRKCZ, SFRP2, SLIT2, SMAD3, SMAD7]	[AKAP1, ATXN1, BDKRB1, BDKRB2, BMP4, BMP7, CAV1, CCNB1, CDKN1B, CDKN1C, CDKN2A, CDKN2B, CDKN2C, CDKN2D, CNKSR3, DUSP6, DYNLL1, ENG, ENPP1, ERRFI1, FAM129A, GRB10, IBTK, IGFBP3, IL2, INHA, INHBA, INPP5J, INPP5K, INSR, JUN, LRP6, MAS1, MEN1, MLXIPL, NF2, NLRP12, PAK3, PARK2, PEBP1, PPAP2B, PPP2CA, PPP2R1A, PPP2R4, PRKCA, PRKCD, PRKCZ, PRKRIP1, PSEN1, PSEN2, PTEN, PTPN6, PTPRC, SFRP1, SFRP2, SLIT2, …	[CCNB1, IGFBP3, INHBA, PRKCZ, SMAD3]	[ATXN1, BDKRB1, BDKRB2, BMP4, CDKN2B, CNKSR3, ENPP1, FAM129A, JUN, PPAP2B, SFRP2, SLIT2, SMAD7]	27.7778	72.2222	Specific for Cluster 2
GO:0045936	GO_BiologicalProcess_16.11.2010_17h17	negative regulation of phosphate metabolic process	18	27.6923	0.014364	0.0391955	[ATXN1, BDKRB1, BDKRB2, BMP4, CCNB1, CDKN2B, CNKSR3, ENPP1, FAM129A, IGFBP3, INHBA, JUN, PPAP2B, PRKCZ, SFRP2, SLIT2, SMAD3, SMAD7]	[AKAP1, ATXN1, BDKRB1, BDKRB2, BMP4, BMP7, CAV1, CCNB1, CDKN1B, CDKN1C, CDKN2A, CDKN2B, CDKN2C, CDKN2D, CNKSR3, DUSP6, DYNLL1, ENG, ENPP1, ERRFI1, FAM129A, GRB10, IBTK, IGFBP3, IL2, INHA, INHBA, INPP5J, INPP5K, INSR, JUN, LRP6, MAS1, MEN1, MLXIPL, NF2, NLRP12, PAK3, PARK2, PEBP1, PPAP2B, PPP2CA, PPP2R1A, PPP2R4, PRKCA, PRKCD, PRKCZ, PRKRIP1, PSEN1, PSEN2, PTEN, PTPN6, PTPRC, SFRP1, SFRP2, SLIT2, …	[CCNB1, IGFBP3, INHBA, PRKCZ, SMAD3]	[ATXN1, BDKRB1, BDKRB2, BMP4, CDKN2B, CNKSR3, ENPP1, FAM129A, JUN, PPAP2B, SFRP2, SLIT2, SMAD7]	27.7778	72.2222	Specific for Cluster 2
GO:0046394	GO_BiologicalProcess_16.11.2010_17h17	carboxylic acid biosynthetic process	37	23.2704	0.0144927	0.0393374	[ACACB, ACSM3, ALOX12, ALOX15, BCAT2, BHMT2, C5orf4, CBR4, CDO1, CH25H, EDN2, ELOVL6, FASN, GOT2, HAAO, INDO, KYNU, LPL, MCAT, MGLL, MTHFD1, PLA2G5, PLP1, PRKAA2, PRKAB2, PRKAG2, PRODH, PTGDS, PTGIS, PTGS1, PTPLA, PTPLAD2, PYCRL, S100A9, SCD5, SLC1A3, SRR]	[ABHD5, ACACA, ACACB, ACADM, ACSL3, ACSM3, ADI1, AGPAT1, AGPAT2, AGXT, AIFM2, AKR1A1, AKR1D1, ALDH18A1, ALDH4A1, ALOX12, ALOX12B, ALOX15, ALOX15B, ALOX5, ALOX5AP, ALOXE3, APIP, ASL, ASNS, ASNSD1, ASS1, BBOX1, BCAT1, BCAT2, BHMT, BHMT2, C14orf148, C5orf4, CBR4, CBS, CD74, CDO1, CH25H, CYP39A1, CYP7A1, CYP7B1, DEGS1, DEGS2, DGAT2L4, DHFR, DHFRL1, EDN1, EDN2, ELOVL1, ELOVL2, ELOVL3, ELOVL4, ELOVL5, …	[ACSM3, ALOX12, ALOX15, BCAT2, CBR4, EDN2, ELOVL6, FASN, GOT2, INDO, KYNU, MCAT, MTHFD1, PRODH, PYCRL, S100A9, SLC1A3]	[ACACB, BHMT2, C5orf4, CDO1, CH25H, HAAO, LPL, MGLL, PLA2G5, PLP1, PRKAA2, PRKAB2, PRKAG2, PTGDS, PTGIS, PTGS1, PTPLA, PTPLAD2, SCD5, SRR]	45.9459	54.0541	Common
GO:0019228	GO_BiologicalProcess_16.11.2010_17h17	regulation of action potential in neuron	16	28.5714	0.0150679	0.0406833	[CLDN1, CLDN11, EGR2, ERBB2, FOXA2, GRIK5, ILK, KCNMB4, KLK6, LGI4, NAB1, NAB2, NTF3, P2RX1, PLP1, POU3F1]	[ACSBG1, AFG3L2, AMIGO1, C11orf9, CD8A, CD9, CHRNA1, CLDN1, CLDN11, DHH, DRD1, EGR2, EIF2B2, EIF2B4, EIF2B5, ERBB2, ERCC2, FOXA2, GAL3ST1, GJC3, GNPAT, GRIK5, HEXB, ILK, KCNMB3, KCNMB4, KLK6, LGI4, NAB1, NAB2, NF1, NFASC, NTF3, OLIG2, P2RX1, P2RX3, P2RX4, P2RX7, PLLP, PLP1, POU3F1, POU3F2, PPARD, PRDX6, PRG2, PXMP2, QKI, SBF2, SCN1A, SCN2A, SCN8A, SKI, SOD1, TGFB1, TSC1, ZNF24]	[CLDN1, ERBB2, FOXA2, KLK6, POU3F1]	[CLDN11, EGR2, GRIK5, ILK, KCNMB4, LGI4, NAB1, NAB2, NTF3, P2RX1, PLP1]	31.25	68.75	Specific for Cluster 2
GO:0045934	GO_BiologicalProcess_16.11.2010_17h17	negative regulation of nucleobase, nucleoside, nucleotide and nucleic acid metabolic process	116	19.7279	0.0151906	0.0407999	[ADRA2A, ANTXR1, ARID5A, ARID5B, ASCL2, ATF7IP, ATXN1, BARX2, BCL6B, BMP4, CDC45L, CDC6, CDT1, CENPF, CRYM, DAB2, DEDD2, DKK3, DNAJB5, E2F1, EDNRA, ENO1, ERCC4, EREG, FGF13, FOXA1, FOXF1, FOXF2, FOXJ1, FOXN3, FOXP1, FZD1, GATA6, GATAD2A, GLI2, GLIS2, GMNN, HAND1, HDAC4, HELLS, HES2, HEY1, HHEX, HOXB4, HSBP1, ID1, ID3, JAZF1, JDP2, KLF10, KLF4, LCOR, LDB2, LMCD1, LRRFIP1, MDFI, MEF2C, MEIS2, MLH1,…	[ACD, ADRA2A, AES, AKIRIN2, AKT2, ALX1, ANTXR1, APLP1, ARID4A, ARID5A, ARID5B, ASCL1, ASCL2, ATF7IP, ATN1, ATP8B1, ATPIF1, ATXN1, AXIN1, BAHD1, BARD1, BARX2, BASP1, BAZ2A, BCL3, BCL6, BCL6B, BCL7A, BCLAF1, BCOR, BLM, BMP2, BMP4, BMP7, BPTF, BRCA1, BRCA2, BTAF1, BTRC, C14orf169, C1D, C21orf33, CALCA, CALR, CAV1, CBX2, CBX3, CBX4, CBX5, CBY1, CCDC85B, CD38, CDA, CDC45L, CDC6, CDKN1B, CDKN1C, CDT1, …	[ASCL2, ATF7IP, BARX2, CDC45L, CDC6, CDT1, CENPF, DEDD2, E2F1, ENO1, EREG, FOXA1, FOXJ1, GATAD2A, GMNN, HELLS, HES2, HEY1, HOXB4, HSBP1, ID1, LCOR, MDFI, MSH2, NACC1, NPM1, NR2F6, PAX9, PKIA, POU2F1, PTPRU, S100A11, SCGB1A1, SIRT6, SMAD3, SOX2, TIMELESS, TP53, TP63, TP73, TRIM24, TRIM27, TWIST2, TXN, WWTR1, XRCC5]	[ADRA2A, ANTXR1, ARID5A, ARID5B, ATXN1, BCL6B, BMP4, CRYM, DAB2, DKK3, DNAJB5, EDNRA, ERCC4, FGF13, FOXF1, FOXF2, FOXN3, FOXP1, FZD1, GATA6, GLI2, GLIS2, HAND1, HDAC4, HHEX, ID3, JAZF1, JDP2, KLF10, KLF4, LDB2, LMCD1, LRRFIP1, MEF2C, MEIS2, MLH1, NFIC, NFIX, NR2F1, PALM, PBXIP1, PER1, PER2, PEX14, PGR, PKIG, PRDM6, PRICKLE1, PRRX1, RBPJ, SATB1, SCMH1, SFRP2, SMAD7, SNAI1, SORBS3, SOX18, TBL1X, TC…	39.6552	60.3448	Common
GO:0051172	GO_BiologicalProcess_16.11.2010_17h17	negative regulation of nitrogen compound metabolic process	117	19.697	0.0154963	0.0414041	[ADRA2A, ANTXR1, ARID5A, ARID5B, ASCL2, ATF7IP, ATXN1, BARX2, BCL6B, BMP4, CDC45L, CDC6, CDT1, CENPF, COMT, CRYM, DAB2, DEDD2, DKK3, DNAJB5, E2F1, EDNRA, ENO1, ERCC4, EREG, FGF13, FOXA1, FOXF1, FOXF2, FOXJ1, FOXN3, FOXP1, FZD1, GATA6, GATAD2A, GLI2, GLIS2, GMNN, HAND1, HDAC4, HELLS, HES2, HEY1, HHEX, HOXB4, HSBP1, ID1, ID3, JAZF1, JDP2, KLF10, KLF4, LCOR, LDB2, LMCD1, LRRFIP1, MDFI, MEF2C, MEIS2,…	[ACD, ACP5, ADRA2A, AES, AKIRIN2, AKT2, ALX1, ANTXR1, APLP1, APOC1, ARID4A, ARID5A, ARID5B, ASCL1, ASCL2, ATF7IP, ATN1, ATP8B1, ATPIF1, ATXN1, AXIN1, BAHD1, BARD1, BARX2, BASP1, BAZ2A, BCL3, BCL6, BCL6B, BCL7A, BCLAF1, BCOR, BLM, BMP2, BMP4, BMP7, BPTF, BRCA1, BRCA2, BTAF1, BTRC, C14orf169, C1D, C21orf33, CALCA, CALR, CAV1, CBX2, CBX3, CBX4, CBX5, CBY1, CCDC85B, CD38, CDA, CDC45L, CDC6, CDKN1B, C…	[ASCL2, ATF7IP, BARX2, CDC45L, CDC6, CDT1, CENPF, COMT, DEDD2, E2F1, ENO1, EREG, FOXA1, FOXJ1, GATAD2A, GMNN, HELLS, HES2, HEY1, HOXB4, HSBP1, ID1, LCOR, MDFI, MSH2, NACC1, NPM1, NR2F6, PAX9, PKIA, POU2F1, PTPRU, S100A11, SCGB1A1, SIRT6, SMAD3, SOX2, TIMELESS, TP53, TP63, TP73, TRIM24, TRIM27, TWIST2, TXN, WWTR1, XRCC5]	[ADRA2A, ANTXR1, ARID5A, ARID5B, ATXN1, BCL6B, BMP4, CRYM, DAB2, DKK3, DNAJB5, EDNRA, ERCC4, FGF13, FOXF1, FOXF2, FOXN3, FOXP1, FZD1, GATA6, GLI2, GLIS2, HAND1, HDAC4, HHEX, ID3, JAZF1, JDP2, KLF10, KLF4, LDB2, LMCD1, LRRFIP1, MEF2C, MEIS2, MLH1, NFIC, NFIX, NR2F1, PALM, PBXIP1, PER1, PER2, PEX14, PGR, PKIG, PRDM6, PRICKLE1, PRRX1, RBPJ, SATB1, SCMH1, SFRP2, SMAD7, SNAI1, SORBS3, SOX18, TBL1X, TC…	40.1709	59.8291	Common
GO:0044275	GO_BiologicalProcess_16.11.2010_17h17	cellular carbohydrate catabolic process	21	26.25	0.0160619	0.0426929	[DHTKD1, ENO1, ENO2, FUT2, GALE, GAPDH, GNPDA1, HIBADH, HOOK1, KIF2A, LDHA, NUDT5, PDHA1, PFKL, PGD, PGK1, PGLS, PKM2, PYGB, PYGM, RPIA]	[ADPGK, ALDOA, ALDOB, ALDOC, BAD, BPGM, CYP21A2, DHDH, DHTKD1, DLAT, ENO1, ENO2, ENO3, FUT1, FUT10, FUT2, FUT4, FUT5, FUT6, FUT7, FUT8, FUT9, G6PC, GAA, GALE, GAPDH, GBA2, GBA3, GNPDA1, GPD1, GPD1L, GPI, H6PD, HIBADH, HKDC1, HOOK1, HOOK3, KIF2A, LDHA, LDHAL6A, LDHAL6B, LDHB, LDHC, LRP5, MDH1, MDH2, MGAM, MIOX, NUDT3, NUDT5, OGDH, OGDHL, PDHA1, PDHA2, PDHB, PFKFB1, PFKFB2, PFKL, PFKM, PFKP, PGAM2,…	[DHTKD1, ENO1, FUT2, GALE, GAPDH, GNPDA1, HOOK1, KIF2A, LDHA, NUDT5, PDHA1, PFKL, PGD, PGK1, PGLS, PKM2, RPIA]	[ENO2, HIBADH, PYGB, PYGM]	80.9524	19.0476	Specific for Cluster 1
GO:0048666	GO_BiologicalProcess_16.11.2010_17h17	neuron development	71	20.8211	0.0164524	0.0432824	[AGRN, APBB1, ATL1, BBS4, BCL11B, BCL2, BDNF, CCDC64, CDH1, CDK5R1, CELSR2, CTF1, DCLK1, DSCAML1, EFNA5, EGR2, EPHA4, EPHA7, ERBB2, ERBB3, ETV4, FEZ1, FGFR1, GAS1, GAS7, GFRA3, GLI2, GNAO1, GNAQ, GPR98, IGSF9, IHH, ILK, IRX5, ISL2, ITGA1, LAMC1, LGI4, LMNB2, LPPR4, MAP1B, MEF2C, MNX1, NDN, NR2F6, NRP2, NRTN, NRXN1, NTF3, NTN1, ONECUT2, PIP5K1C, PRTFDC1, PTPRZ1, PVRL1, RBPJ, RND1, ROBO3, S100B, SD…	[ABI2, ACSL4, ACSL6, ACTB, ADCY1, ADM, ADORA2A, AFG3L2, AGER, AGRN, ALCAM, ALKBH1, ALMS1, ALS2, AMIGO1, APBB1, APC, APOE, APP, ARX, ASCL1, ATL1, ATOH1, ATP7A, ATXN10, B3GNT2, BAI1, BAIAP2, BBS4, BCL11B, BCL2, BDNF, BMP7, BMPR1B, C1orf187, C21orf33, C5orf13, CABP4, CACNA1A, CACNA1F, CCDC64, CCK, CCKAR, CD44, CDH1, CDH4, CDK5, CDK5R1, CDKN1C, CELSR2, CELSR3, CEP290, CHAT, CHRNB2, CHST3, CLIC5, CLN5…	[AGRN, BCL11B, CCDC64, CDH1, CDK5R1, CELSR2, EFNA5, EPHA4, ERBB2, ERBB3, ETV4, GPR98, IGSF9, IHH, IRX5, ISL2, LMNB2, MNX1, NR2F6, ONECUT2, PTPRZ1, PVRL1, SLC1A3, SLITRK6, TH, TP73, VEGFA]	[APBB1, ATL1, BBS4, BCL2, BDNF, CTF1, DCLK1, DSCAML1, EGR2, EPHA7, FEZ1, FGFR1, GAS1, GAS7, GFRA3, GLI2, GNAO1, GNAQ, ILK, ITGA1, LAMC1, LGI4, LPPR4, MAP1B, MEF2C, NDN, NRP2, NRTN, NRXN1, NTF3, NTN1, PIP5K1C, PRTFDC1, RBPJ, RND1, ROBO3, S100B, SDC2, SEMA3B, SLIT2, SLIT3, SPON2, SRF, VASP]	38.0282	61.9718	Common
GO:0048015	GO_BiologicalProcess_16.11.2010_17h17	phosphoinositide-mediated signaling	22	25.8824	0.0164319	0.0434513	[AGTR1, AURKA, BUB1B, CKS2, EDN2, EDNRA, ERBB2, FEN1, FREQ, GNA15, GNAQ, GSN, IGF1, LPAR3, NDC80, P2RY2, P2RY6, SPAG5, TGM2, TOP2A, TYMS, ZWINT]	[AGTR1, AGXT, AURKA, BUB1B, CA8, CALCA, CCKAR, CCKBR, CHRM1, CHRM2, CKS2, DHX34, DRD1, DRD2, DRD5, EDN1, EDN2, EDN3, EDNRA, EDNRB, ERBB2, F2R, F2RL3, FEN1, FREQ, GAB2, GNA11, GNA15, GNAQ, GNB1, GNG13, GPR139, GRM5, GSN, HCRT, HCRTR2, HIST1H4A, HMGB2, HOMER1, HTR2A, IGF1, IGF1R, IL8RB, LACRT, LHCGR, LPAR3, LTB4R, MC3R, NDC80, NMBR, NMUR1, NMUR2, NPR3, NTSR2, P2RY1, P2RY11, P2RY2, P2RY4, P2RY6, PCN…	[AURKA, BUB1B, CKS2, EDN2, ERBB2, FEN1, GNA15, LPAR3, NDC80, P2RY2, P2RY6, SPAG5, TOP2A, TYMS, ZWINT]	[AGTR1, EDNRA, FREQ, GNAQ, GSN, IGF1, TGM2]	68.1818	31.8182	Specific for Cluster 1
GO:0050680	GO_BiologicalProcess_16.11.2010_17h17	negative regulation of epithelial cell proliferation	15	28.8462	0.0167206	0.0437635	[BMP4, CDKN2B, EREG, ETV4, GAS1, KRT4, PTCH1, SERPINF1, SFRP2, SOX2, TGFBR3, THBS1, TSC2, WDR77, WFDC1]	[APC, APOE, APOH, AREG, ATP5A1, ATPIF1, BMP4, BRCA2, CAV1, CAV2, CDK6, CDKN1C, CDKN2B, ENG, EREG, ESR2, ETV4, GAS1, GHRL, IL26, KRT4, MAGED1, MCC, NF1, NKX2-8, NKX3-1, NR2F2, PHB2, PPARD, PTCH1, PTEN, PTPRM, ROBO1, RUNX3, SCG2, SCYE1, SERPINF1, SFRP1, SFRP2, SOX2, STK11, TGFB1, TGFB2, TGFBR3, THBS1, TINF2, TSC2, VASH1, WDR77, WFDC1, WNT10B, WNT5A]	[EREG, ETV4, KRT4, SOX2, WDR77]	[BMP4, CDKN2B, GAS1, PTCH1, SERPINF1, SFRP2, TGFBR3, THBS1, TSC2, WFDC1]	33.3333	66.6667	Specific for Cluster 2
GO:0010638	GO_BiologicalProcess_16.11.2010_17h17	positive regulation of organelle organization	25	25	0.0170905	0.0445046	[ARRB1, CCL11, CCNB1, CDC42EP2, CENPE, EREG, ESPL1, HOXA13, IGF1, IL1B, MAP1B, MAPT, NCKAP1L, NPM1, NUSAP1, PLK4, PPARGC1A, ROCK2, SMAD3, SORBS3, SYNPO, TAC1, TGFA, TP53, TPM1]	[ACTR3, AMOT, ANXA1, ANXA2, APC, ARF6, ARPC2, ARPC4, ARRB1, BTC, CAV1, CAV3, CCL11, CCL24, CCL26, CCNB1, CD28, CDC42EP2, CDC42EP5, CENPE, DLGAP5, DNMT1, DNMT3B, DOC2B, DRD3, EDN1, EDN3, EGF, EP300, EPGN, EREG, ESPL1, FOXP3, FRAP1, GPR65, HOXA13, IGF1, IGF2, IL1A, IL1B, INS, INSR, JARID2, JMY, KATNB1, KISS1R, LIMK1, LRP5, MAP1B, MAP3K1, MAPT, MEN1, NCK1, NCK2, NCKAP1L, NF2, NIPBL, NPM1, NUSAP1, P2…	[CCNB1, CENPE, EREG, ESPL1, NPM1, NUSAP1, PLK4, SMAD3, TAC1, TGFA, TP53]	[ARRB1, CCL11, CDC42EP2, HOXA13, IGF1, IL1B, MAP1B, MAPT, NCKAP1L, PPARGC1A, ROCK2, SORBS3, SYNPO, TPM1]	44	56	Common
GO:0034762	GO_BiologicalProcess_16.11.2010_17h17	regulation of transmembrane transport	28	24.3478	0.0172341	0.0446519	[ADRA2A, AXIN2, BMP4, CDC2, CDH1, FLNA, FREQ, FZD7, GNAQ, JPH2, JUP, MDFI, MXI1, PKD2, PKIA, PKIG, POU5F1, RBPMS, SLC25A23, SLC9A3R1, SMAD3, TACC3, TGFB3, TGFBR1, THRA, TLR2, TXN, WWTR1]	[ACTN4, ADORA2A, ADRA2A, ADRB2, AKAP1, AKAP5, APOC3, AXIN1, AXIN2, BAMBI, BCL3, BMP4, BMPR1A, C11orf59, CACNA1G, CACNB4, CALM1, CAV3, CCKAR, CD27, CDC2, CDH1, CTNNB1, CYLD, DRD2, DRD3, DRD4, EDA, EFCAB4B, EGF, EGFR, EMD, EP300, FAF1, FKBP1A, FKBP1B, FLNA, FREQ, FZD7, G3BP2, GLI3, GNAI2, GNAQ, GREM1, HOMER1, IL10, IL1RAPL1, INS, JAK2, JPH1, JPH2, JPH3, JPH4, JUP, LACRT, LPAL2, MBTPS1, MDFI, MXI1, …	[CDC2, CDH1, JUP, MDFI, PKIA, POU5F1, SLC9A3R1, SMAD3, TACC3, TLR2, TXN, WWTR1]	[ADRA2A, AXIN2, BMP4, FLNA, FREQ, FZD7, GNAQ, JPH2, MXI1, PKD2, PKIG, RBPMS, SLC25A23, TGFB3, TGFBR1, THRA]	42.8571	57.1429	Common
GO:0009913	GO_BiologicalProcess_16.11.2010_17h17	epidermal cell differentiation	19	26.7606	0.0174726	0.0450423	[CASP3, CLIC4, CNFN, CSTA, EREG, EVPL, GLI2, IRF6, IVL, POU3F1, S100A7, SFN, SPRR1A, SPRR1B, SPRR2D, SPRR2E, SPRR2F, SPRR3, TGM1]	[ADAM9, ANXA1, CASP3, CDSN, CLIC4, CNFN, CSTA, DSPP, ERCC2, ERCC3, EREG, EVPL, FLG, FOXI1, FOXI2, FOXI3, FOXN1, GLI1, GLI2, HRNR, IRF6, IVL, JAG1, KRT2, LCE1A, LCE1B, LCE1C, LCE1D, LCE1E, LCE1F, LCE2A, LCE2B, LCE2C, LCE2D, LCE3A, LCE3B, LCE3C, LCE3D, LCE3E, LCE4A, LCE5A, LCE6A, LOR, MADCAM1, MAP2K1, POU2F3, POU3F1, PPHLN1, PPL, S100A7, SCEL, SFN, SHARPIN, SPINK5, SPRR1A, SPRR1B, SPRR2A, SPRR2B, S…	[CASP3, CNFN, CSTA, EREG, EVPL, IRF6, IVL, POU3F1, S100A7, SFN, SPRR1A, SPRR1B, SPRR2D, SPRR2E, SPRR2F, SPRR3, TGM1]	[CLIC4, GLI2]	89.4737	10.5263	Specific for Cluster 1
GO:0060538	GO_BiologicalProcess_16.11.2010_17h17	skeletal muscle organ development	19	26.7606	0.0174726	0.0450423	[AGRN, CACNB2, COL19A1, DCN, ERBB2, ERBB3, FOXP1, IGFBP5, MBNL1, MEOX2, MNX1, MYL6, PAX7, RCAN1, SIX1, SIX4, SNTA1, SVIL, TNNC1]	[ACTA1, AFG3L2, AGRN, ALS2, APP, CACNA1S, CACNB2, CACNB4, CACNG2, CAV1, CAV2, CDK5, CHAT, CHRNA1, CHRND, COL19A1, CSRP3, CTSB, DCN, DMD, DNAJA3, DNER, DVL1, EP300, ERBB2, ERBB3, F2R, FGFRL1, FOXL2, FOXP1, FOXP2, GPX1, HLX, HOMER1, HOXD10, HOXD9, IGFBP5, IGSF8, MBNL1, MEOX2, MNX1, MUSK, MYF5, MYF6, MYL3, MYL6, MYL6B, MYLPF, MYOD1, MYOG, NR2F2, NRD1, PAX7, PITX1, PPP3CA, RCAN1, RHOA, RXRG, SIN3B, S…	[AGRN, ERBB2, ERBB3, MNX1, PAX7, SIX1, SIX4, TNNC1]	[CACNB2, COL19A1, DCN, FOXP1, IGFBP5, MBNL1, MEOX2, MYL6, RCAN1, SNTA1, SVIL]	42.1053	57.8947	Common
GO:2000027	GO_BiologicalProcess_16.11.2010_17h17	regulation of organ morphogenesis	19	26.7606	0.0174726	0.0450423	[ASPN, BCL2, BDNF, BMP4, CDH1, ESR1, ETV4, FGF13, FGF7, FGFR1, FOXP1, HOXA11, POU5F1, SFRP2, SIX1, TFAP2A, VEGFA, WNT10A, WNT2B]	[AMELX, APC, AREG, ASPN, BAX, BCL2, BCOR, BDNF, BMP2, BMP4, BMP7, BMPR1A, BTF3L1, CASP6, CDH1, CITED1, CNTF, CSF1, CTNNB1, DVL1, DVL2, DVL3, ESR1, ETV4, FGF1, FGF10, FGF13, FGF3, FGF7, FGFR1, FOXP1, FOXP2, FOXP3, FRS2, GDNF, GREM1, HOXA11, HOXC11, HOXD11, HOXD13, IFT88, KGFLP1, KGFLP2, MESP1, MLF2, MMP20, NGFR, NOG, NOL3, PDGFA, PHB2, POU5F1, RXRA, SFRP1, SFRP2, SFRP5, SHH, SIX1, SOS1, SPRY1, TFA…	[CDH1, ETV4, POU5F1, SIX1, TFAP2A, VEGFA, WNT10A]	[ASPN, BCL2, BDNF, BMP4, ESR1, FGF13, FGF7, FGFR1, FOXP1, HOXA11, SFRP2, WNT2B]	36.8421	63.1579	Common
GO:0007589	GO_BiologicalProcess_16.11.2010_17h17	body fluid secretion	16	28.0702	0.0178538	0.0457951	[AGR2, APLN, AQP1, ATP7B, BCAT2, CCND1, CDO1, CEL, COASY, KIF2A, NPR1, STAT5B, TP73, TRPC1, VEGFA, XDH]	[ADORA2A, AGPAT6, AGR2, ANXA2, ANXA2P2, APLN, AQP1, AQP5, ATP7B, AVP, BCAT2, CAV1, CCKAR, CCND1, CDO1, CEL, CHUK, COASY, COPA, CREB1, DRD2, EDN1, EIF2AK3, FGF10, GHRHR, GUCA1B, GUCA2B, KCNN4, KIF2A, KNG1, LACRT, MBD4, NEURL, NPPB, NPR1, NPR3, OXTR, PMCH, PRL, PRLR, RAB14, SCT, SLC22A2, SLC22A4, SLC30A4, SLC6A3, STAT5A, STAT5B, STATH, TP73, TRPC1, UCN, USF2, VDR, VEGFA, VIP, XDH]	[AGR2, APLN, ATP7B, BCAT2, CCND1, CEL, COASY, KIF2A, TP73, VEGFA, XDH]	[AQP1, CDO1, NPR1, STAT5B, TRPC1]	68.75	31.25	Specific for Cluster 1
GO:0006259	GO_BiologicalProcess_16.11.2010_17h17	DNA metabolic process	100	19.8807	0.0188059	0.0477597	[ABL1, ANTXR1, APEX1, APITD1, ATF7IP, ATM, AXIN2, BCL11B, BNIP3, BRCC3, BTG2, C17orf28, CASP3, CCNE2, CCNO, CDC25C, CDC45L, CDC6, CDC7, CDK7, CDT1, CENPF, CHAF1A, CHEK1, CHTF18, CIDEA, CINP, CTGF, DKC1, DNA2, DNASE1L3, DTL, ERCC4, ESCO2, EXO1, EYA1, EYA4, FAM175A, FANCA, FANCF, FANCI, FEN1, FOXP1, GADD45G, GATAD2A, GINS1, GINS2, GTF2H3, HELLS, HMGA1, HMGB3, IGF1, KRT7, MCM10, MCM3, MCM4, MCM5, MC…	[ABL1, ACD, ACHE, ADRA1D, AICDA, AIFM1, ALKBH1, ALKBH2, ALKBH3, ANTXR1, APAF1, APEX1, APEX2, APITD1, APLF, APTX, ARTN, ASF1A, ASTE1, ASZ1, ATF7IP, ATM, ATRIP, ATRX, ATXN3, AXIN2, BANF1, BARD1, BAX, BAZ1B, BAZ2A, BCCIP, BCL11B, BHLHB2, BIRC7, BLM, BNIP3, BRCA1, BRCA2, BRCC3, BRE, BRIP1, BTBD12, BTG2, C10orf2, C11orf30, C14orf115, C17orf28, C17orf70, C19orf40, C1orf124, C8orf45, C9orf102, CASP3, CC…	[APEX1, APITD1, ATF7IP, BCL11B, BRCC3, C17orf28, CASP3, CCNE2, CCNO, CDC25C, CDC45L, CDC6, CDC7, CDK7, CDT1, CENPF, CHAF1A, CHEK1, CHTF18, CINP, DKC1, DNA2, DTL, ESCO2, EXO1, FANCA, FANCF, FANCI, FEN1, GATAD2A, GINS1, GINS2, GTF2H3, HELLS, HMGA1, HMGB3, KRT7, MCM10, MCM3, MCM4, MCM5, MCM7, MND1, MSH2, NPM1, ORC1L, PALB2, POLD1, PPFIBP2, PRKDC, PTTG1, RAD51AP1, RAD54L, RECQL4, RFWD3, RNASEH2A, RRM…	[ABL1, ANTXR1, ATM, AXIN2, BNIP3, BTG2, CIDEA, CTGF, DNASE1L3, ERCC4, EYA1, EYA4, FAM175A, FOXP1, GADD45G, IGF1, MLH1, NFIB, NFIC, NFIX, PSIP1, RBBP7, RBPJ, REV3L, RRAD, TERF2IP, TPD52L1]	73	27	Specific for Cluster 1
GO:0001934	GO_BiologicalProcess_16.11.2010_17h17	positive regulation of protein phosphorylation	31	23.6641	0.0189083	0.0477831	[ADIPOQ, ANGPT1, AXIN2, BCL2, BMP4, BMP6, CCNB1, CCND1, CCND2, CTGF, DAB2, EDNRA, FAM129A, FGF13, FGF7, FZD1, GHR, IGF1, IL1B, ITGA5, KITLG, PRKAG2, RBPMS, S100A9, TGFB3, TGFBR1, THBS4, TP53, TTK, VEGFA, VEGFB]	[ACVR1B, ADAM17, ADIPOQ, ADNP, AGXT, AKAP5, AKT2, AKTIP, ANGPT1, ANGPT4, ARTN, AXIN1, AXIN2, BCL2, BMP10, BMP2, BMP4, BMP6, BMP7, BMPR1A, BMPR2, CAMP, CARD14, CAV1, CCK, CCNB1, CCND1, CCND2, CCND3, CD3E, CD4, CD44, CD74, CD80, CD81, CLCF1, CNTF, CRYAA, CSF2, CSNK1D, CTGF, DAB2, DOCK7, DVL2, DVL3, EDNRA, ENG, EP300, EPX, F2, FAM129A, FCER1A, FGF1, FGF10, FGF13, FGF7, FRAP1, FZD1, FZD8, GDF2, GDF6,…	[CCNB1, CCND1, S100A9, TP53, TTK, VEGFA]	[ADIPOQ, ANGPT1, AXIN2, BCL2, BMP4, BMP6, CCND2, CTGF, DAB2, EDNRA, FAM129A, FGF13, FGF7, FZD1, GHR, IGF1, IL1B, ITGA5, KITLG, PRKAG2, RBPMS, TGFB3, TGFBR1, THBS4, VEGFB]	19.3548	80.6452	Specific for Cluster 2
GO:0019320	GO_BiologicalProcess_16.11.2010_17h17	hexose catabolic process	17	27.4194	0.0187985	0.0479782	[DHTKD1, ENO1, ENO2, FUT2, GALE, GAPDH, HIBADH, HOOK1, KIF2A, LDHA, PDHA1, PFKL, PGD, PGK1, PGLS, PKM2, RPIA]	[ADPGK, ALDOA, ALDOB, ALDOC, BAD, BPGM, DHTKD1, DLAT, ENO1, ENO2, ENO3, FUT1, FUT10, FUT2, FUT4, FUT5, FUT6, FUT7, FUT8, FUT9, GALE, GAPDH, GPI, H6PD, HIBADH, HKDC1, HOOK1, HOOK3, KIF2A, LDHA, LDHAL6A, LDHAL6B, LDHB, LDHC, LRP5, MDH1, MDH2, OGDH, OGDHL, PDHA1, PDHA2, PDHB, PFKFB1, PFKFB2, PFKL, PFKM, PFKP, PGAM2, PGAM4, PGD, PGK1, PGK2, PGLS, PGM1, PKLR, PKM2, RPIA, TALDO1, TKTL1, TPI1, UBL4A, UE…	[DHTKD1, ENO1, FUT2, GALE, GAPDH, HOOK1, KIF2A, LDHA, PDHA1, PFKL, PGD, PGK1, PGLS, PKM2, RPIA]	[ENO2, HIBADH]	88.2353	11.7647	Specific for Cluster 1
GO:0052547	GO_BiologicalProcess_16.11.2010_17h17	regulation of peptidase activity	27	24.3243	0.0193259	0.048599	[A2ML1, ALOX12, BIRC5, CDH1, COL4A3, CRYAB, CSTA, CTGF, DHCR24, ECM1, FURIN, HSPA5, HSPE1, IFI27, MOAP1, NLRP2, NR4A1, P2RX1, PDCD6, PMAIP1, PYCARD, SFN, SMAD3, SOX2, STAT1, THBS1, TP53]	[A2ML1, ADORA2A, AIFM1, AIFM3, AKT2, ALOX12, APAF1, BAD, BAX, BBC3, BCL2L10, BCL2L13, BIRC5, BIRC8, C6, C9, CARD8, CASP8AP2, CASP9, CAV1, CCK, CDH1, CDKN2A, CDKN2D, COL4A3, CRYAA, CRYAB, CST3, CSTA, CSTB, CTGF, CYCS, DHCR24, DIABLO, DLEC1, DNAJA3, DNAJB6, ECM1, EIF2AK3, F2, F2R, F3, FASLG, FOXL2, FOXQ1, FURIN, GPX1, GSPT1, HBXIP, HERPUD1, HIP1, HMGB1, HSPA5, HSPD1, HSPE1, IAPP, IFI27, IFI6, IFNB1…	[A2ML1, ALOX12, BIRC5, CDH1, CSTA, DHCR24, FURIN, HSPA5, HSPE1, IFI27, NLRP2, PDCD6, PMAIP1, PYCARD, SFN, SMAD3, SOX2, STAT1, TP53]	[COL4A3, CRYAB, CTGF, ECM1, MOAP1, NR4A1, P2RX1, THBS1]	70.3704	29.6296	Specific for Cluster 1
GO:0006357	GO_BiologicalProcess_16.11.2010_17h17	regulation of transcription from RNA polymerase II promoter	151	19.0898	0.0194483	0.0486683	[ABL1, AGRN, ANKRD1, ARNT2, ARNTL2, ARRB1, ASCL2, ATF7IP, ATXN1, BARX2, BCL11B, BCL6B, BMP3, BMP4, BMP6, CDK7, CREB3L4, CRYM, DNAJB5, E2F1, EGR2, ENO1, ESRRA, FGF13, FHL2, FOXA1, FOXA2, FOXF1, FOXF2, FOXJ1, FOXJ2, FOXN3, FOXP1, FSTL3, GATA6, GLI2, HAND1, HAND2, HCFC2, HDAC4, HEY1, HHEX, HOXA13, HOXB4, HSBP1, HTATIP2, ID1, ID3, IGF1, IHH, IKZF2, IL1B, INHBA, JAZF1, JDP2, JUN, KAT2B, KLF10, KLF9, L…	[AATF, ABCA2, ABL1, ABLIM3, ABRA, ACVR1B, ADRB2, AES, AGRN, AHR, AKIRIN2, AKT2, ALX1, ALX4, ANKRD1, APP, AREG, ARNT, ARNT2, ARNTL, ARNTL2, ARRB1, ASCL1, ASCL2, ASCL3, ATF1, ATF4, ATF5, ATF6, ATF7IP, ATN1, ATOH1, ATXN1, AXIN1, BARHL2, BARX2, BCL11B, BCL3, BCL6, BCL6B, BCL9L, BCOR, BLOC1S2, BLZF1, BMP2, BMP3, BMP4, BMP6, BMP7, BPTF, BRCA1, BRD7, BRD8, BRIP1, BSX, BUD31, C19orf2, C21orf33, CALCOCO1,…	[AGRN, ARNTL2, ASCL2, ATF7IP, BARX2, BCL11B, BMP3, CDK7, CREB3L4, E2F1, ENO1, ESRRA, FOXA1, FOXA2, FOXJ1, HEY1, HOXB4, HSBP1, HTATIP2, ID1, IHH, IKZF2, INHBA, LCOR, MDFI, MED19, MNX1, MYCN, NR2F6, ONECUT2, PAX8, PAX9, PKIA, POU2F1, POU5F1, PRKDC, PUS1, SCGB1A1, SIX1, SIX2, SIX4, SMAD3, SMARCD1, SOX2, SOX21, TAF4, TARBP2, TBX1, TCF19, TFAP2A, TFAP2C, TIMELESS, TLR2, TP53, TP63, TP73, TRAK1, TRIM27…	[ABL1, ANKRD1, ARNT2, ARRB1, ATXN1, BCL6B, BMP4, BMP6, CRYM, DNAJB5, EGR2, FGF13, FHL2, FOXF1, FOXF2, FOXJ2, FOXN3, FOXP1, FSTL3, GATA6, GLI2, HAND1, HAND2, HCFC2, HDAC4, HHEX, HOXA13, ID3, IGF1, IL1B, JAZF1, JDP2, JUN, KAT2B, KLF10, KLF9, LMCD1, LPIN2, LRRFIP1, MED13L, MEF2C, MEIS2, MEOX1, MITF, NFIC, NFIX, NR2F1, NR4A1, NR4A3, NTF3, PBX1, PER1, PER2, PKIG, PKN1, PKNOX2, PLAGL1, PPARGC1A, PRKCB,…	43.7086	56.2914	Common
GOID	Ontology Source	GOTerm	Nr. Genes	% Associated Genes	Term PValue	Term PValue Corrected with Benjamini-Hochberg	Associated Genes Found	All Associated Genes	Cluster1 Genes	Cluster2 Genes	% Cluster1 Gene	% Cluster2 Gene
GO:0008201	GO_MolecularFunction_16.11.2010_17h17	heparin binding	42	37.1681	3.35725e-08	2.51794e-06	[ADAMTS1, ADAMTS8, ANG, BMP4, C4orf31, CCDC80, CCL2, CEL, CHRD, CRISPLD2, CTGF, CTSG, CXCL6, CYR61, ECM2, FGF13, FGF7, FGF9, FGFBP1, FGFR1, FN1, FSTL1, LAMC2, LIPG, LPL, MDK, PCOLCE2, PLA2G5, POSTN, PRELP, PTCH1, PTN, RSPO2, RSPO3, SLIT2, SOD3, TGFBR3, THBS1, THBS3, THBS4, VEGFA, VEGFB]	[AAMP, ADAMTS1, ADAMTS3, ADAMTS8, ANG, APLP1, APOA5, APOB, APOE, APOH, APP, AZU1, BMP4, BMP7, C4orf31, C6orf15, CCDC80, CCL15, CCL2, CCL23, CCL7, CCL8, CECR1, CEL, CHRD, COL13A1, COL25A1, COL5A1, COL5A3, COMP, CRISPLD2, CTGF, CTSG, CXCL6, CYR61, DBNL, ECM2, FBLN7, FBRS, FGF1, FGF10, FGF12, FGF13, FGF14, FGF4, FGF7, FGF9, FGFBP1, FGFBP3, FGFR1, FGFR2, FGFRL1, FN1, FSTL1, GPNMB, HBEGF, HDGF, HRG, H…	[CEL, CXCL6, FGFBP1, LAMC2, LIPG, MDK, VEGFA]	[ADAMTS1, ADAMTS8, ANG, BMP4, C4orf31, CCDC80, CCL2, CHRD, CRISPLD2, CTGF, CTSG, CYR61, ECM2, FGF13, FGF7, FGF9, FGFR1, FN1, FSTL1, LPL, PCOLCE2, PLA2G5, POSTN, PRELP, PTCH1, PTN, RSPO2, RSPO3, SLIT2, SOD3, TGFBR3, THBS1, THBS3, THBS4, VEGFB]	16.6667	83.3333	Specific for Cluster 2
GO:0005509	GO_MolecularFunction_16.11.2010_17h17	calcium ion binding	138	22.294	1.50664e-05	0.000564991	[ANKRD5, ANXA10, ANXA6, ASPN, C1R, CALB1, CALML3, CAMKK2, CAPN1, CAPN13, CASQ2, CBLC, CD248, CDH1, CDH11, CDH19, CDH26, CDK5R1, CELSR1, CELSR2, CHP2, CPNE6, CRNN, DCHS1, DGKA, DGKB, DNAJB5, DNASE1L3, DSC3, DSG2, DSG3, DTNA, DUOX2, EFEMP1, EFEMP2, EHD2, ELTD1, EML1, EMR1, EPDR1, FAM110A, FAT2, FAT4, FBLN1, FBLN2, FBLN5, FBN1, FREM2, FREQ, FSTL1, GALNT3, GAS6, GPD2, GPR98, GSN, HEG1, HSPA5, ITGB1BP…	[ACTN1, ACTN2, ACTN3, ACTN4, ADAMTS13, AIF1, AMY2A, ANKRD5, ANXA1, ANXA10, ANXA11, ANXA13, ANXA2, ANXA2P2, ANXA3, ANXA4, ANXA5, ANXA6, ANXA7, ANXA8, ANXA8L1, ANXA8L2, ANXA9, ARSA, ASPH, ASPN, ATP2A1, ATP2A2, ATP2B2, ATP2C1, ATP5B, BGLAP, BMP1, BNIP2, C14orf143, C17orf57, C1R, C1S, C1orf87, C3orf25, CABP1, CABP2, CABP4, CABP5, CABP7, CACNA1A, CADPS, CALB1, CALB2, CALM1, CALML3, CALML4, CALML5, CAL…	[ANKRD5, ANXA10, CALB1, CALML3, CAPN1, CAPN13, CBLC, CDH1, CDH26, CDK5R1, CELSR1, CELSR2, CHP2, CRNN, DGKA, DSC3, DSG2, DSG3, DUOX2, EMR1, FAM110A, FAT2, FREM2, GALNT3, GPD2, GPR98, HSPA5, JAG2, LPCAT1, MMP10, MMP11, MMP13, MMP14, MMP15, PADI3, PCDH1, PDCD6, PLA2G2F, PLCH2, PRSS3, PVALB, RAB11FIP4, REPS2, S100A11, S100A2, S100A5, S100A7, S100A8, S100A9, S100P, SLC25A13, SLC25A24, STAT1, TBC1D8, T…	[ANXA6, ASPN, C1R, CAMKK2, CASQ2, CD248, CDH11, CDH19, CPNE6, DCHS1, DGKB, DNAJB5, DNASE1L3, DTNA, EFEMP1, EFEMP2, EHD2, ELTD1, EML1, EPDR1, FAT4, FBLN1, FBLN2, FBLN5, FBN1, FREQ, FSTL1, GAS6, GSN, HEG1, ITGB1BP2, KCNIP4, LDLR, LTBP1, LTBP4, MAN1A1, MASP1, MATN2, MGP, MMP3, MYL6, MYL9, NCALD, NECAB1, NOTCH2, NOTCH4, PCDH10, PCDH18, PCDH20, PCDH7, PITPNM2, PKD2, PLA2G5, PLCB4, PLCD4, PLSCR4, RASGR…	41.3043	58.6957	Common
GO:0019199	GO_MolecularFunction_16.11.2010_17h17	transmembrane receptor protein kinase activity	28	34.1463	3.89896e-05	0.000974739	[ACVR1, ACVRL1, AXL, DDR1, DDR2, EFEMP1, EFNA4, EPHA1, EPHA3, EPHA4, EPHA7, EPHB6, ERBB2, ERBB3, FGFR1, LTBP1, LTBP4, MST1R, NRP2, NTRK2, NTRK3, PDGFRB, PDGFRL, PTK7, RORA, TGFBR1, TGFBR3, TRIM27]	[ACVR1, ACVR1B, ACVR1C, ACVR2A, ACVR2B, ACVRL1, ALK, AMHR2, AXL, BMPR1A, BMPR1B, BMPR2, CRIM1, CSF1R, DDR1, DDR2, EFEMP1, EFNA3, EFNA4, EFNB3, EGFR, ENG, EPHA1, EPHA10, EPHA2, EPHA3, EPHA4, EPHA5, EPHA6, EPHA7, EPHA8, EPHB1, EPHB2, EPHB3, EPHB4, EPHB6, ERBB2, ERBB3, ERBB4, FGFR1, FGFR2, FGFR3, FGFR4, FGFRL1, FKBP1A, FLT1, FLT3, FLT4, IGF1R, IGF2R, INSR, INSRR, IRS1, KDR, KIT, LTBP1, LTBP4, LTK, M…	[DDR1, EFNA4, EPHA1, EPHA4, EPHB6, ERBB2, ERBB3, MST1R, PTK7, TRIM27]	[ACVR1, ACVRL1, AXL, DDR2, EFEMP1, EPHA3, EPHA7, FGFR1, LTBP1, LTBP4, NRP2, NTRK2, NTRK3, PDGFRB, PDGFRL, RORA, TGFBR1, TGFBR3]	35.7143	64.2857	Common
GO:0004714	GO_MolecularFunction_16.11.2010_17h17	transmembrane receptor protein tyrosine kinase activity	22	33.8462	0.000294156	0.00551542	[AXL, DDR1, DDR2, EFEMP1, EFNA4, EPHA1, EPHA3, EPHA4, EPHA7, EPHB6, ERBB2, ERBB3, FGFR1, MST1R, NRP2, NTRK2, NTRK3, PDGFRB, PDGFRL, PTK7, RORA, TRIM27]	[ALK, AXL, CRIM1, CSF1R, DDR1, DDR2, EFEMP1, EFNA3, EFNA4, EFNB3, EGFR, EPHA1, EPHA10, EPHA2, EPHA3, EPHA4, EPHA5, EPHA6, EPHA7, EPHA8, EPHB1, EPHB2, EPHB3, EPHB4, EPHB6, ERBB2, ERBB3, ERBB4, FGFR1, FGFR2, FGFR3, FGFR4, FGFRL1, FLT1, FLT3, FLT4, IGF1R, IGF2R, INSR, INSRR, IRS1, KDR, KIT, LTK, MERTK, MST1R, MUSK, NRP1, NRP2, NTRK1, NTRK2, NTRK3, PDGFRA, PDGFRB, PDGFRL, PTK7, RET, RNMT, RORA, ROS1,…	[DDR1, EFNA4, EPHA1, EPHA4, EPHB6, ERBB2, ERBB3, MST1R, PTK7, TRIM27]	[AXL, DDR2, EFEMP1, EPHA3, EPHA7, FGFR1, NRP2, NTRK2, NTRK3, PDGFRB, PDGFRL, RORA]	45.4545	54.5455	Common
GO:0004672	GO_MolecularFunction_16.11.2010_17h17	protein kinase activity	118	20.9591	0.0008184	0.012276	[ABL1, ABL2, ACVR1, ACVRL1, AKT3, ANTXR1, ATM, AURKA, AURKB, AXL, BUB1, BUB1B, CAD, CAMK1, CAMKK1, CAMKK2, CCL2, CCNB1, CCND1, CDC2, CDC42BPG, CDC7, CDK5R1, CDK7, CHEK1, CSK, DAPK3, DCLK1, DCLK2, DDR1, DDR2, DMPK, EFEMP1, EFNA4, EPHA1, EPHA3, EPHA4, EPHA7, EPHB6, ERBB2, ERBB3, FASTKD3, FGFR1, FYN, GTF2H3, HSPB8, IKBKE, ILK, IRAK1, IRAK2, JAK1, KCNH2, LATS2, LRRK2, LTBP1, LTBP4, MAP3K5, MAP3K6, MA…	[AAK1, AATK, ABL1, ABL2, ACVR1, ACVR1B, ACVR1C, ACVR2A, ACVR2B, ACVRL1, ADCK1, ADCK2, ADCK4, ADCK5, ADRBK1, ADRBK2, AKAP13, AKT1, AKT2, AKT3, ALK, ALPK1, ALPK2, ALPK3, AMHR2, ANKK1, ANTXR1, ARAF, ARHGEF7, ATM, ATRIP, AURKA, AURKB, AURKC, AXL, BAZ1B, BCKDK, BCR, BLK, BMP2K, BMPR1A, BMPR1B, BMPR2, BMX, BRAF, BRD2, BRDT, BRSK1, BRSK2, BTK, BUB1, BUB1B, CAB39, CAD, CAMK1, CAMK1D, CAMK1G, CAMK2A, CAMK…	[AURKA, AURKB, BUB1, BUB1B, CAD, CCNB1, CCND1, CDC2, CDC42BPG, CDC7, CDK5R1, CDK7, CHEK1, CSK, DDR1, EFNA4, EPHA1, EPHA4, EPHB6, ERBB2, ERBB3, FASTKD3, GTF2H3, IKBKE, IRAK1, IRAK2, MAP3K5, MAP4K3, MAPK13, MAPKAPK3, MELK, MOCOS, MST1R, NEK2, OBSCN, PBK, PDIK1L, PDK3, PKMYT1, PLK1, PLK4, PPP4C, PRKCZ, PRKD2, PRKDC, PTK6, PTK7, RIPK4, RPS6KA1, RPS6KA4, SBK1, SRPK1, STK32C, TGFA, TNK1, TRIM24, TRIM27…	[ABL1, ABL2, ACVR1, ACVRL1, AKT3, ANTXR1, ATM, AXL, CAMK1, CAMKK1, CAMKK2, CCL2, DAPK3, DCLK1, DCLK2, DDR2, DMPK, EFEMP1, EPHA3, EPHA7, FGFR1, FYN, HSPB8, ILK, JAK1, KCNH2, LATS2, LRRK2, LTBP1, LTBP4, MAP3K6, MAPK4, MYLK, NEK5, NEK7, NPR1, NPR2, NR4A3, NRK, NRP2, NTRK2, NTRK3, PDGFRB, PDGFRL, PDK4, PKN1, PRKAA2, PRKACB, PRKAG2, PRKCB, ROCK2, RORA, SNRK, SPEG, SRPK3, STK38L, TGFBR1, TGFBR3, ZAK]	50	50	Common
GO:0004713	GO_MolecularFunction_16.11.2010_17h17	protein tyrosine kinase activity	35	25.7353	0.00220272	0.0206505	[ABL1, ABL2, AXL, CAMKK2, CSK, DDR1, DDR2, EFEMP1, EFNA4, EPHA1, EPHA3, EPHA4, EPHA7, EPHB6, ERBB2, ERBB3, FGFR1, FYN, JAK1, MST1R, NR4A3, NRP2, NTRK2, NTRK3, OBSCN, PDGFRB, PDGFRL, PLK4, PTK6, PTK7, RORA, TNK1, TRIM27, TTK, TWF1]	[AATK, ABL1, ABL2, ALK, AXL, BAZ1B, BLK, BMX, BTK, CAMKK2, CCL13, CCL4, CLK1, CLK3, CLK4, CRIM1, CRKL, CSF1R, CSK, DDR1, DDR2, DYRK1A, DYRK1B, DYRK2, DYRK3, DYRK4, EFEMP1, EFNA3, EFNA4, EFNB3, EGFR, EPHA1, EPHA10, EPHA2, EPHA3, EPHA4, EPHA5, EPHA6, EPHA7, EPHA8, EPHB1, EPHB2, EPHB3, EPHB4, EPHB6, ERBB2, ERBB3, ERBB4, FER, FES, FGFR1, FGFR2, FGFR3, FGFR4, FGFRL1, FGR, FLT1, FLT3, FLT4, FRK, FYN, H…	[CSK, DDR1, EFNA4, EPHA1, EPHA4, EPHB6, ERBB2, ERBB3, MST1R, OBSCN, PLK4, PTK6, PTK7, TNK1, TRIM27, TTK, TWF1]	[ABL1, ABL2, AXL, CAMKK2, DDR2, EFEMP1, EPHA3, EPHA7, FGFR1, FYN, JAK1, NR4A3, NRP2, NTRK2, NTRK3, PDGFRB, PDGFRL, RORA]	48.5714	51.4286	Common
GO:0008009	GO_MolecularFunction_16.11.2010_17h17	chemokine activity	16	34.0426	0.00177732	0.0222165	[C5, CCL11, CCL17, CCL18, CCL2, CCL21, CXCL1, CXCL10, CXCL11, CXCL12, CXCL13, CXCL14, CXCL2, CXCL6, CXCL9, KLF5]	[C5, CCL1, CCL11, CCL13, CCL14, CCL15, CCL16, CCL17, CCL18, CCL19, CCL2, CCL20, CCL21, CCL22, CCL23, CCL24, CCL25, CCL26, CCL27, CCL3, CCL3L1, CCL4, CCL4L1, CCL5, CCL7, CCL8, CX3CL1, CXCL1, CXCL10, CXCL11, CXCL12, CXCL13, CXCL14, CXCL16, CXCL2, CXCL3, CXCL5, CXCL6, CXCL9, ENC1, IL8, KLF5, PF4, PF4V1, PPBP, XCL1, XCL2]	[CCL17, CCL18, CXCL1, CXCL10, CXCL11, CXCL13, CXCL14, CXCL6, CXCL9, KLF5]	[C5, CCL11, CCL2, CCL21, CXCL12, CXCL2]	62.5	37.5	Common
GO:0042379	GO_MolecularFunction_16.11.2010_17h17	chemokine receptor binding	17	32.6923	0.00213308	0.0228544	[C5, CCL11, CCL17, CCL18, CCL2, CCL21, CREB3L4, CXCL1, CXCL10, CXCL11, CXCL12, CXCL13, CXCL14, CXCL2, CXCL6, CXCL9, KLF5]	[C5, CCL1, CCL11, CCL13, CCL14, CCL15, CCL16, CCL17, CCL18, CCL19, CCL2, CCL20, CCL21, CCL22, CCL23, CCL24, CCL25, CCL26, CCL27, CCL3, CCL3L1, CCL4, CCL4L1, CCL5, CCL7, CCL8, CCR2, CREB3L4, CX3CL1, CXCL1, CXCL10, CXCL11, CXCL12, CXCL13, CXCL14, CXCL16, CXCL2, CXCL3, CXCL5, CXCL6, CXCL9, ENC1, IL8, ITCH, KLF5, PF4, PF4V1, PPBP, S100A11P, XCL1, XCL2, YARS]	[CCL17, CCL18, CREB3L4, CXCL1, CXCL10, CXCL11, CXCL13, CXCL14, CXCL6, CXCL9, KLF5]	[C5, CCL11, CCL2, CCL21, CXCL12, CXCL2]	64.7059	35.2941	Common
GOID	Ontology Source	GOTerm	Nr. Genes	% Associated Genes	Term PValue	Term PValue Corrected with Benjamini-Hochberg	Associated Genes Found	All Associated Genes	Cluster1 Genes	Cluster2 Genes	% Cluster1 Gene	% Cluster2 Gene
KEGG:04512	KEGG_15.03.2011	ECM-receptor interaction	36	42.3529	1.61032e-08	2.89858e-06	[AGRN, CD36, COL1A2, COL3A1, COL4A2, COL4A4, COL4A5, COL4A6, COL6A1, COL6A2, FN1, GP6, HMMR, HSPG2, ITGA1, ITGA11, ITGA2, ITGA3, ITGA5, ITGA6, ITGA7, ITGB4, LAMA2, LAMA3, LAMA4, LAMB2, LAMB3, LAMC1, LAMC2, SDC1, SDC2, SDC3, SPP1, THBS1, THBS3, THBS4]	[AGRN, CD36, CD44, CD47, CHAD, COL11A1, COL11A2, COL1A1, COL1A2, COL2A1, COL3A1, COL4A1, COL4A2, COL4A4, COL4A5, COL4A6, COL5A1, COL5A2, COL5A3, COL6A1, COL6A2, COL6A3, COL6A6, COMP, DAG1, FN1, GP1BA, GP1BB, GP5, GP6, GP9, HMMR, HSPG2, IBSP, ITGA1, ITGA10, ITGA11, ITGA2, ITGA2B, ITGA3, ITGA4, ITGA5, ITGA6, ITGA7, ITGA8, ITGA9, ITGAV, ITGB1, ITGB3, ITGB4, ITGB5, ITGB6, ITGB7, ITGB8, LAMA1, LAMA2, …	[AGRN, HMMR, ITGA2, ITGA3, ITGA6, ITGB4, LAMA3, LAMB3, LAMC2, SDC1, SPP1]	[CD36, COL1A2, COL3A1, COL4A2, COL4A4, COL4A5, COL4A6, COL6A1, COL6A2, FN1, GP6, HSPG2, ITGA1, ITGA11, ITGA5, ITGA7, LAMA2, LAMA4, LAMB2, LAMC1, SDC2, SDC3, THBS1, THBS3, THBS4]	30.5556	69.4444	Specific for Cluster 2
KEGG:04510	KEGG_15.03.2011	Focal adhesion	64	32	4.28126e-08	3.85314e-06	[AKT3, BCL2, BIRC3, CCND1, CCND2, CDC42, COL1A2, COL3A1, COL4A2, COL4A4, COL4A5, COL4A6, COL6A1, COL6A2, ERBB2, FIGF, FLNA, FLNC, FN1, FYN, HGF, HRAS, IGF1, ILK, ITGA1, ITGA11, ITGA2, ITGA3, ITGA5, ITGA6, ITGA7, ITGB4, JUN, LAMA2, LAMA3, LAMA4, LAMB2, LAMB3, LAMC1, LAMC2, MET, MRLC2, MYL9, MYLK, PARVA, PDGFRB, PIP5K1C, PPP1CA, PPP1R12A, PRKCB, RAC3, RAP1A, ROCK2, SPP1, THBS1, THBS3, THBS4, TLN2, …	[ACTB, ACTG1, ACTN1, ACTN2, ACTN3, ACTN4, AKT1, AKT2, AKT3, ARHGAP5, BAD, BCAR1, BCL2, BIRC2, BIRC3, BRAF, CAPN2, CAV1, CAV2, CAV3, CCND1, CCND2, CCND3, CDC42, CHAD, COL11A1, COL11A2, COL1A1, COL1A2, COL2A1, COL3A1, COL4A1, COL4A2, COL4A4, COL4A5, COL4A6, COL5A1, COL5A2, COL5A3, COL6A1, COL6A2, COL6A3, COL6A6, COMP, CRK, CRKL, CTNNB1, DIAPH1, DOCK1, EGF, EGFR, ELK1, ERBB2, FIGF, FLNA, FLNB, FLNC,…	[BIRC3, CCND1, CDC42, ERBB2, HRAS, ITGA2, ITGA3, ITGA6, ITGB4, LAMA3, LAMB3, LAMC2, MET, MRLC2, PPP1CA, RAC3, SPP1, VAV2, VAV3, VEGFA]	[AKT3, BCL2, CCND2, COL1A2, COL3A1, COL4A2, COL4A4, COL4A5, COL4A6, COL6A1, COL6A2, FIGF, FLNA, FLNC, FN1, FYN, HGF, IGF1, ILK, ITGA1, ITGA11, ITGA5, ITGA7, JUN, LAMA2, LAMA4, LAMB2, LAMC1, MYL9, MYLK, PARVA, PDGFRB, PIP5K1C, PPP1R12A, PRKCB, RAP1A, ROCK2, THBS1, THBS3, THBS4, TLN2, VASP, VCL, VEGFB]	31.25	68.75	Specific for Cluster 2
KEGG:04110	KEGG_15.03.2011	Cell cycle	44	34.375	6.47403e-07	3.88442e-05	[ABL1, ANAPC10, ATM, BUB1, BUB1B, CCNA2, CCNB1, CCNB2, CCND1, CCND2, CCNE1, CCNE2, CDC2, CDC20, CDC25C, CDC45L, CDC6, CDC7, CDK7, CDKN2B, CHEK1, E2F1, E2F5, ESPL1, GADD45B, GADD45G, MAD2L1, MCM2, MCM3, MCM4, MCM5, MCM7, ORC1L, PKMYT1, PLK1, PRKDC, PTTG1, SFN, SKP2, SMAD3, TGFB3, TP53, TTK, YWHAZ]	[100506332, ABL1, ANAPC1, ANAPC10, ANAPC11, ANAPC13, ANAPC2, ANAPC4, ANAPC5, ANAPC7, ATM, ATR, BUB1, BUB1B, BUB3, CCNA1, CCNA2, CCNB1, CCNB2, CCNB3, CCND1, CCND2, CCND3, CCNE1, CCNE2, CCNH, CDC14A, CDC14B, CDC16, CDC2, CDC20, CDC23, CDC25A, CDC25B, CDC25C, CDC26, CDC27, CDC45L, CDC6, CDC7, CDK2, CDK4, CDK6, CDK7, CDKN1A, CDKN1B, CDKN1C, CDKN2A, CDKN2B, CDKN2C, CDKN2D, CHEK1, CHEK2, CREBBP, CUL1, …	[ANAPC10, BUB1, BUB1B, CCNA2, CCNB1, CCNB2, CCND1, CCNE1, CCNE2, CDC2, CDC20, CDC25C, CDC45L, CDC6, CDC7, CDK7, CHEK1, E2F1, E2F5, ESPL1, MAD2L1, MCM2, MCM3, MCM4, MCM5, MCM7, ORC1L, PKMYT1, PLK1, PRKDC, PTTG1, SFN, SKP2, SMAD3, TP53, TTK, YWHAZ]	[ABL1, ATM, CCND2, CDKN2B, GADD45B, GADD45G, TGFB3]	84.0909	15.9091	Specific for Cluster 1
KEGG:05200	KEGG_15.03.2011	Pathways in cancer	86	26.2997	3.78292e-06	0.000170231	[ABL1, AKT3, ARNT2, AXIN2, BCL2, BID, BIRC3, BIRC5, BMP4, CASP3, CBLC, CCND1, CCNE1, CCNE2, CDC42, CDH1, CDKN2B, CKS1B, COL4A2, COL4A4, COL4A5, COL4A6, DAPK3, E2F1, ERBB2, FADD, FGF13, FGF2, FGF7, FGF9, FGFR1, FIGF, FN1, FZD1, FZD4, FZD7, GLI2, GSTP1, HGF, HRAS, IGF1, ITGA2, ITGA3, ITGA6, JAK1, JUN, JUP, KITLG, LAMA2, LAMA3, LAMA4, LAMB2, LAMB3, LAMC1, LAMC2, MET, MITF, MLH1, MMP9, MSH2, NOS2, PA…	[ABL1, AKT1, AKT2, AKT3, APC, APC2, APPL1, AR, ARAF, ARNT, ARNT2, AXIN1, AXIN2, BAD, BAX, BCL2, BCL2L1, BCR, BID, BIRC2, BIRC3, BIRC5, BMP2, BMP4, BRAF, BRCA2, CASP3, CASP8, CASP9, CBL, CBLB, CBLC, CCDC6, CCNA1, CCND1, CCNE1, CCNE2, CDC42, CDH1, CDK2, CDK4, CDK6, CDKN1A, CDKN1B, CDKN2A, CDKN2B, CEBPA, CHUK, CKS1B, COL4A1, COL4A2, COL4A4, COL4A5, COL4A6, CREBBP, CRK, CRKL, CSF1R, CSF2RA, CSF3R, CT…	[BID, BIRC3, BIRC5, CASP3, CBLC, CCND1, CCNE1, CCNE2, CDC42, CDH1, CKS1B, E2F1, ERBB2, FADD, GSTP1, HRAS, ITGA2, ITGA3, ITGA6, JUP, LAMA3, LAMB3, LAMC2, MET, MMP9, MSH2, NOS2, PAX8, PLD1, RAC3, RALBP1, SKP2, SLC2A1, SMAD3, STAT1, TGFA, TP53, TRAF3, TRAF4, VEGFA, WNT10A]	[ABL1, AKT3, ARNT2, AXIN2, BCL2, BMP4, CDKN2B, COL4A2, COL4A4, COL4A5, COL4A6, DAPK3, FGF13, FGF2, FGF7, FGF9, FGFR1, FIGF, FN1, FZD1, FZD4, FZD7, GLI2, HGF, IGF1, JAK1, JUN, KITLG, LAMA2, LAMA4, LAMB2, LAMC1, MITF, MLH1, PDGFRB, PRKCB, PTCH1, RUNX1T1, STAT5B, TGFB3, TGFBR1, TRAF5, VEGFB, WNT2B, ZBTB16]	47.6744	52.3256	Common
KEGG:05414	KEGG_15.03.2011	Dilated cardiomyopathy	32	35.5556	9.84986e-06	0.000354595	[ACTC1, ADCY5, ADCY9, ADRB1, CACNA1C, CACNA1D, CACNB2, CACNB3, DES, IGF1, ITGA1, ITGA11, ITGA2, ITGA3, ITGA5, ITGA6, ITGA7, ITGB4, LAMA2, PLN, PRKACB, RYR2, SGCA, SGCB, SGCD, SGCG, SLC8A1, TGFB3, TNNC1, TNNT2, TPM1, TPM2]	[ACTB, ACTC1, ACTG1, ADCY1, ADCY2, ADCY3, ADCY4, ADCY5, ADCY6, ADCY7, ADCY8, ADCY9, ADRB1, ATP2A2, CACNA1C, CACNA1D, CACNA1F, CACNA1S, CACNA2D1, CACNA2D2, CACNA2D3, CACNA2D4, CACNB1, CACNB2, CACNB3, CACNB4, CACNG1, CACNG2, CACNG3, CACNG4, CACNG5, CACNG6, CACNG7, CACNG8, DAG1, DES, DMD, EMD, GNAS, IGF1, ITGA1, ITGA10, ITGA11, ITGA2, ITGA2B, ITGA3, ITGA4, ITGA5, ITGA6, ITGA7, ITGA8, ITGA9, ITGAV, I…	[ADRB1, CACNA1D, CACNB3, ITGA2, ITGA3, ITGA6, ITGB4, TNNC1]	[ACTC1, ADCY5, ADCY9, CACNA1C, CACNB2, DES, IGF1, ITGA1, ITGA11, ITGA5, ITGA7, LAMA2, PLN, PRKACB, RYR2, SGCA, SGCB, SGCD, SGCG, SLC8A1, TGFB3, TNNT2, TPM1, TPM2]	25	75	Specific for Cluster 2
KEGG:05410	KEGG_15.03.2011	Hypertrophic cardiomyopathy (HCM)	30	36.1446	1.28194e-05	0.000384583	[ACTC1, CACNA1C, CACNA1D, CACNB2, CACNB3, DES, IGF1, ITGA1, ITGA11, ITGA2, ITGA3, ITGA5, ITGA6, ITGA7, ITGB4, LAMA2, PRKAA2, PRKAB2, PRKAG2, RYR2, SGCA, SGCB, SGCD, SGCG, SLC8A1, TGFB3, TNNC1, TNNT2, TPM1, TPM2]	[ACE, ACTB, ACTC1, ACTG1, ATP2A2, CACNA1C, CACNA1D, CACNA1F, CACNA1S, CACNA2D1, CACNA2D2, CACNA2D3, CACNA2D4, CACNB1, CACNB2, CACNB3, CACNB4, CACNG1, CACNG2, CACNG3, CACNG4, CACNG5, CACNG6, CACNG7, CACNG8, DAG1, DES, DMD, EMD, IGF1, IL6, ITGA1, ITGA10, ITGA11, ITGA2, ITGA2B, ITGA3, ITGA4, ITGA5, ITGA6, ITGA7, ITGA8, ITGA9, ITGAV, ITGB1, ITGB3, ITGB4, ITGB5, ITGB6, ITGB7, ITGB8, LAMA2, LMNA, MYBPC…	[CACNA1D, CACNB3, ITGA2, ITGA3, ITGA6, ITGB4, TNNC1]	[ACTC1, CACNA1C, CACNB2, DES, IGF1, ITGA1, ITGA11, ITGA5, ITGA7, LAMA2, PRKAA2, PRKAB2, PRKAG2, RYR2, SGCA, SGCB, SGCD, SGCG, SLC8A1, TGFB3, TNNT2, TPM1, TPM2]	23.3333	76.6667	Specific for Cluster 2
KEGG:05222	KEGG_15.03.2011	Small cell lung cancer	30	35.2941	2.19411e-05	0.000493675	[AKT3, BCL2, BIRC3, CCND1, CCNE1, CCNE2, CDKN2B, CKS1B, COL4A2, COL4A4, COL4A5, COL4A6, E2F1, FN1, ITGA2, ITGA3, ITGA6, LAMA2, LAMA3, LAMA4, LAMB2, LAMB3, LAMC1, LAMC2, NOS2, SKP2, TP53, TRAF3, TRAF4, TRAF5]	[AKT1, AKT2, AKT3, APAF1, BCL2, BCL2L1, BIRC2, BIRC3, CASP9, CCND1, CCNE1, CCNE2, CDK2, CDK4, CDK6, CDKN1B, CDKN2B, CHUK, CKS1B, COL4A1, COL4A2, COL4A4, COL4A5, COL4A6, CYCS, E2F1, E2F2, E2F3, FHIT, FN1, IKBKB, IKBKG, ITGA2, ITGA2B, ITGA3, ITGA6, ITGAV, ITGB1, LAMA1, LAMA2, LAMA3, LAMA4, LAMA5, LAMB1, LAMB2, LAMB3, LAMB4, LAMC1, LAMC2, LAMC3, MAX, MYC, NFKB1, NFKBIA, NOS2, PIAS1, PIAS2, PIAS3, PI…	[BIRC3, CCND1, CCNE1, CCNE2, CKS1B, E2F1, ITGA2, ITGA3, ITGA6, LAMA3, LAMB3, LAMC2, NOS2, SKP2, TP53, TRAF3, TRAF4]	[AKT3, BCL2, CDKN2B, COL4A2, COL4A4, COL4A5, COL4A6, FN1, LAMA2, LAMA4, LAMB2, LAMC1, TRAF5]	56.6667	43.3333	Common
KEGG:04115	KEGG_15.03.2011	p53 signaling pathway	26	37.6812	2.07197e-05	0.000532792	[ATM, BID, CASP3, CCNB1, CCNB2, CCND1, CCND2, CCNE1, CCNE2, CDC2, CHEK1, EI24, GADD45B, GADD45G, IGF1, IGFBP3, PERP, PMAIP1, RRM2, SFN, STEAP3, THBS1, TP53, TP53I3, TP73, TSC2]	[APAF1, ATM, ATR, BAI1, BAX, BBC3, BID, CASP3, CASP8, CASP9, CCNB1, CCNB2, CCNB3, CCND1, CCND2, CCND3, CCNE1, CCNE2, CCNG1, CCNG2, CD82, CDC2, CDK2, CDK4, CDK6, CDKN1A, CDKN2A, CHEK1, CHEK2, CYCS, DDB2, EI24, FAS, GADD45A, GADD45B, GADD45G, GTSE1, IGF1, IGFBP3, LOC651610, LRDD, MDM2, MDM4, P53AIP1, PERP, PMAIP1, PPM1D, PTEN, RCHY1, RFWD2, RPRM, RRM2, RRM2B, SERPINB5, SERPINE1, SESN1, SESN2, SESN3…	[BID, CASP3, CCNB1, CCNB2, CCND1, CCNE1, CCNE2, CDC2, CHEK1, EI24, IGFBP3, PERP, PMAIP1, RRM2, SFN, STEAP3, TP53, TP53I3, TP73]	[ATM, CCND2, GADD45B, GADD45G, IGF1, THBS1, TSC2]	73.0769	26.9231	Specific for Cluster 1
KEGG:04010	KEGG_15.03.2011	MAPK signaling pathway	70	26.1194	3.98184e-05	0.000796368	[AKT3, ARRB1, ARRB2, BDNF, CACNA1C, CACNA1D, CACNA1H, CACNA1I, CACNB2, CACNB3, CASP3, CDC42, CHP2, DDIT3, DUSP1, DUSP16, DUSP3, DUSP5, DUSP8, DUSP9, FGF13, FGF2, FGF7, FGF9, FGFR1, FLNA, FLNC, GADD45B, GADD45G, GNA12, GNG12, HRAS, HSPA2, HSPA6, IL1B, JUN, MAP3K5, MAP3K6, MAP4K3, MAPK13, MAPK8IP2, MAPKAPK3, MAPT, MEF2C, MRAS, NFATC4, NR4A1, NTF3, NTF4, NTRK2, PDGFRB, PLA2G2F, PLA2G5, PPP3CB, PPP3C…	[AKT1, AKT2, AKT3, ARRB1, ARRB2, ATF2, ATF4, BDNF, BRAF, CACNA1A, CACNA1B, CACNA1C, CACNA1D, CACNA1E, CACNA1F, CACNA1G, CACNA1H, CACNA1I, CACNA1S, CACNA2D1, CACNA2D2, CACNA2D3, CACNA2D4, CACNB1, CACNB2, CACNB3, CACNB4, CACNG1, CACNG2, CACNG3, CACNG4, CACNG5, CACNG6, CACNG7, CACNG8, CASP3, CD14, CDC25B, CDC42, CHP, CHP2, CHUK, CRK, CRKL, DAXX, DDIT3, DUSP1, DUSP10, DUSP14, DUSP16, DUSP2, DUSP22, D…	[CACNA1D, CACNA1I, CACNB3, CASP3, CDC42, CHP2, DUSP9, HRAS, MAP3K5, MAP4K3, MAPK13, MAPK8IP2, MAPKAPK3, NTF4, PLA2G2F, PTPRR, RAC3, RPS6KA1, RPS6KA4, STMN1, TP53]	[AKT3, ARRB1, ARRB2, BDNF, CACNA1C, CACNA1H, CACNB2, DDIT3, DUSP1, DUSP16, DUSP3, DUSP5, DUSP8, FGF13, FGF2, FGF7, FGF9, FGFR1, FLNA, FLNC, GADD45B, GADD45G, GNA12, GNG12, HSPA2, HSPA6, IL1B, JUN, MAP3K6, MAPT, MEF2C, MRAS, NFATC4, NR4A1, NTF3, NTRK2, PDGFRB, PLA2G5, PPP3CB, PPP3CC, PRKACB, PRKCB, RAP1A, RASGRP2, RRAS, SRF, TGFB3, TGFBR1, ZAK]	30	70	Specific for Cluster 2
KEGG:04270	KEGG_15.03.2011	Vascular smooth muscle contraction	35	30.1724	0.000194024	0.00349243	[ACTA2, ACTG2, ADCY5, ADCY9, ADORA2B, AGTR1, CACNA1C, CACNA1D, CALD1, CALML3, EDNRA, GNA12, GNAQ, ITPR1, ITPR3, KCNMB1, KCNMB4, MRVI1, MYH11, MYL6, MYL9, MYLK, NPR1, NPR2, PLA2G2F, PLA2G5, PLCB4, PPP1CA, PPP1R12A, PPP1R12B, PPP1R14A, PRKACB, PRKCB, RAMP1, ROCK2]	[ACTA2, ACTG2, ADCY1, ADCY2, ADCY3, ADCY4, ADCY5, ADCY6, ADCY7, ADCY8, ADCY9, ADORA2A, ADORA2B, ADRA1A, ADRA1B, ADRA1D, AGTR1, ARAF, ARHGEF1, ARHGEF11, ARHGEF12, AVPR1A, AVPR1B, BRAF, CACNA1C, CACNA1D, CACNA1F, CACNA1S, CALCRL, CALD1, CALM1, CALM2, CALM3, CALML3, CALML5, CALML6, CYP4A11, CYP4A22, EDNRA, GNA11, GNA12, GNA13, GNAQ, GNAS, GUCY1A2, GUCY1A3, GUCY1B3, ITPR1, ITPR2, ITPR3, JMJD7-PLA2G4B…	[ADORA2B, CACNA1D, CALML3, ITPR3, PLA2G2F, PPP1CA]	[ACTA2, ACTG2, ADCY5, ADCY9, AGTR1, CACNA1C, CALD1, EDNRA, GNA12, GNAQ, ITPR1, KCNMB1, KCNMB4, MRVI1, MYH11, MYL6, MYL9, MYLK, NPR1, NPR2, PLA2G5, PLCB4, PPP1R12A, PPP1R12B, PPP1R14A, PRKACB, PRKCB, RAMP1, ROCK2]	17.1429	82.8571	Specific for Cluster 2
KEGG:05144	KEGG_15.03.2011	Malaria	19	37.2549	0.000315736	0.00516659	[CCL2, CD36, CSF3, DARC, GYPC, HGF, ICAM1, IL1B, KLRB1, MET, SDC1, SDC2, SDC3, SELE, TGFB3, THBS1, THBS3, THBS4, TLR2]	[CCL2, CD36, CD40, CD40LG, CD81, COMP, CR1, CSF3, DARC, GYPA, GYPB, GYPC, HBA1, HBA2, HBB, HBD, HGF, ICAM1, IFNG, IL10, IL12A, IL18, IL1B, IL6, IL8, ITGAL, ITGB2, KLRB1, KLRK1, LRP1, MET, MYD88, PECAM1, SDC1, SDC2, SDC3, SDC4, SELE, SELP, TGFB1, TGFB2, TGFB3, THBS1, THBS2, THBS3, THBS4, TLR2, TLR4, TLR9, TNF, VCAM1]	[CSF3, MET, SDC1, TLR2]	[CCL2, CD36, DARC, GYPC, HGF, ICAM1, IL1B, KLRB1, SDC2, SDC3, SELE, TGFB3, THBS1, THBS3, THBS4]	21.0526	78.9474	Specific for Cluster 2
KEGG:00350	KEGG_15.03.2011	Tyrosine metabolism	16	39.0244	0.00050936	0.00764039	[ADH1B, ADH1C, ADH4, ADH7, ALDH3A1, ALDH3B2, AOC2, AOC3, AOX1, COMT, GOT2, GSTZ1, MAOB, METTL6, MIF, TH]	[ADH1A, ADH1B, ADH1C, ADH4, ADH5, ADH6, ADH7, ALDH1A3, ALDH3A1, ALDH3B1, ALDH3B2, AOC2, AOC3, AOX1, COMT, DBH, DCT, DDC, FAH, GOT1, GOT2, GSTZ1, HEMK1, HGD, HPD, IL4I1, LCMT1, LCMT2, MAOA, MAOB, METTL2B, METTL6, MIF, PNMT, TAT, TH, TPO, TRMT11, TYR, TYRP1, WBSCR22]	[ADH1C, ADH7, ALDH3A1, ALDH3B2, AOC2, COMT, GOT2, GSTZ1, METTL6, MIF, TH]	[ADH1B, ADH4, AOC3, AOX1, MAOB]	68.75	31.25	Specific for Cluster 1
KEGG:05412	KEGG_15.03.2011	Arrhythmogenic right ventricular cardiomyopathy (ARVC)	24	32.4324	0.000610358	0.0084511	[CACNA1C, CACNA1D, CACNB2, CACNB3, DES, DSC2, DSG2, DSP, ITGA1, ITGA11, ITGA2, ITGA3, ITGA5, ITGA6, ITGA7, ITGB4, JUP, LAMA2, RYR2, SGCA, SGCB, SGCD, SGCG, SLC8A1]	[ACTB, ACTG1, ACTN1, ACTN2, ACTN3, ACTN4, ATP2A2, CACNA1C, CACNA1D, CACNA1F, CACNA1S, CACNA2D1, CACNA2D2, CACNA2D3, CACNA2D4, CACNB1, CACNB2, CACNB3, CACNB4, CACNG1, CACNG2, CACNG3, CACNG4, CACNG5, CACNG6, CACNG7, CACNG8, CDH2, CTNNA1, CTNNA2, CTNNA3, CTNNB1, DAG1, DES, DMD, DSC2, DSG2, DSP, EMD, GJA1, ITGA1, ITGA10, ITGA11, ITGA2, ITGA2B, ITGA3, ITGA4, ITGA5, ITGA6, ITGA7, ITGA8, ITGA9, ITGAV, I…	[CACNA1D, CACNB3, DSC2, DSG2, DSP, ITGA2, ITGA3, ITGA6, ITGB4, JUP]	[CACNA1C, CACNB2, DES, ITGA1, ITGA11, ITGA5, ITGA7, LAMA2, RYR2, SGCA, SGCB, SGCD, SGCG, SLC8A1]	41.6667	58.3333	Common
KEGG:04114	KEGG_15.03.2011	Oocyte meiosis	33	28.9474	0.000670899	0.00862584	[ADCY5, ADCY9, ANAPC10, AURKA, BUB1, CALML3, CCNB1, CCNB2, CCNE1, CCNE2, CDC2, CDC20, CDC25C, CHP2, CPEB1, ESPL1, FBXO5, IGF1, ITPR1, ITPR3, MAD2L1, PGR, PKMYT1, PLK1, PPP1CA, PPP2R5A, PPP3CB, PPP3CC, PRKACB, PTTG1, RPS6KA1, SGOL1, YWHAZ]	[100506332, ADCY1, ADCY2, ADCY3, ADCY4, ADCY5, ADCY6, ADCY7, ADCY8, ADCY9, ANAPC1, ANAPC10, ANAPC11, ANAPC13, ANAPC2, ANAPC4, ANAPC5, ANAPC7, AR, AURKA, BTRC, BUB1, CALM1, CALM2, CALM3, CALML3, CALML5, CALML6, CAMK2A, CAMK2B, CAMK2D, CAMK2G, CCNB1, CCNB2, CCNE1, CCNE2, CDC16, CDC2, CDC20, CDC23, CDC25C, CDC26, CDC27, CDK2, CHP, CHP2, CPEB1, CUL1, ESPL1, FBXO43, FBXO5, FBXW11, IGF1, IGF1R, INS, IT…	[ANAPC10, AURKA, BUB1, CALML3, CCNB1, CCNB2, CCNE1, CCNE2, CDC2, CDC20, CDC25C, CHP2, ESPL1, FBXO5, ITPR3, MAD2L1, PKMYT1, PLK1, PPP1CA, PTTG1, RPS6KA1, SGOL1, YWHAZ]	[ADCY5, ADCY9, CPEB1, IGF1, ITPR1, PGR, PPP2R5A, PPP3CB, PPP3CC, PRKACB]	69.697	30.303	Specific for Cluster 1
KEGG:00980	KEGG_15.03.2011	Metabolism of xenobiotics by cytochrome P450	23	32.3944	0.000802285	0.00962742	[ADH1B, ADH1C, ADH4, ADH7, ALDH3A1, ALDH3B2, CYP1B1, CYP2C18, CYP2C9, CYP2F1, CYP2S1, EPHX1, GSTA1, GSTM1, GSTM3, GSTM5, GSTO2, GSTP1, GSTZ1, MGST1, MGST3, UGT2A3, UGT2B7]	[ADH1A, ADH1B, ADH1C, ADH4, ADH5, ADH6, ADH7, AKR1C1, AKR1C2, AKR1C3, AKR1C4, ALDH1A3, ALDH3A1, ALDH3B1, ALDH3B2, CYP1A1, CYP1A2, CYP1B1, CYP2B6, CYP2C18, CYP2C19, CYP2C8, CYP2C9, CYP2E1, CYP2F1, CYP2S1, CYP3A4, CYP3A43, CYP3A5, CYP3A7, DHDH, EPHX1, GSTA1, GSTA2, GSTA3, GSTA4, GSTA5, GSTK1, GSTM1, GSTM2, GSTM3, GSTM4, GSTM5, GSTO1, GSTO2, GSTP1, GSTT1, GSTT2, GSTZ1, MGST1, MGST2, MGST3, UGT1A1, U…	[ADH1C, ADH7, ALDH3A1, ALDH3B2, CYP2C18, CYP2C9, CYP2F1, CYP2S1, GSTA1, GSTM1, GSTM3, GSTO2, GSTP1, GSTZ1, MGST1, UGT2A3, UGT2B7]	[ADH1B, ADH4, CYP1B1, EPHX1, GSTM5, MGST3]	73.913	26.087	Specific for Cluster 1
KEGG:04020	KEGG_15.03.2011	Calcium signaling pathway	46	25.9887	0.000933884	0.0105062	[ADCY9, ADORA2B, ADRB1, AGTR1, ATP2B4, BDKRB1, BDKRB2, CACNA1C, CACNA1D, CACNA1H, CACNA1I, CALML3, CHP2, CHRM3, EDNRA, ERBB2, ERBB3, GNA15, GNAQ, ITPKB, ITPR1, ITPR3, MYLK, NOS2, P2RX1, PDE1A, PDE1B, PDGFRB, PLCB4, PLCD4, PLN, PPP3CB, PPP3CC, PRKACB, PRKCB, PTGER3, PTGFR, RYR2, RYR3, SLC25A4, SLC8A1, SLC8A2, SPHK2, TACR2, TNNC1, TRPC1]	[ADCY1, ADCY2, ADCY3, ADCY4, ADCY7, ADCY8, ADCY9, ADORA2A, ADORA2B, ADRA1A, ADRA1B, ADRA1D, ADRB1, ADRB2, ADRB3, AGTR1, ATP2A1, ATP2A2, ATP2A3, ATP2B1, ATP2B2, ATP2B3, ATP2B4, AVPR1A, AVPR1B, BDKRB1, BDKRB2, BST1, CACNA1A, CACNA1B, CACNA1C, CACNA1D, CACNA1E, CACNA1F, CACNA1G, CACNA1H, CACNA1I, CACNA1S, CALM1, CALM2, CALM3, CALML3, CALML5, CALML6, CAMK2A, CAMK2B, CAMK2D, CAMK2G, CAMK4, CCKAR, CCKB…	[ADORA2B, ADRB1, CACNA1D, CACNA1I, CALML3, CHP2, ERBB2, ERBB3, GNA15, ITPR3, NOS2, SPHK2, TNNC1]	[ADCY9, AGTR1, ATP2B4, BDKRB1, BDKRB2, CACNA1C, CACNA1H, CHRM3, EDNRA, GNAQ, ITPKB, ITPR1, MYLK, P2RX1, PDE1A, PDE1B, PDGFRB, PLCB4, PLCD4, PLN, PPP3CB, PPP3CC, PRKACB, PRKCB, PTGER3, PTGFR, RYR2, RYR3, SLC25A4, SLC8A1, SLC8A2, TACR2, TRPC1]	28.2609	71.7391	Specific for Cluster 2
KEGG:05146	KEGG_15.03.2011	Amoebiasis	30	28.3019	0.00171766	0.018187	[CASP3, COL1A2, COL3A1, COL4A2, COL4A4, COL4A5, COL4A6, CTSG, CXCL1, FN1, GNA15, GNAQ, IL1B, LAMA2, LAMA3, LAMA4, LAMB2, LAMB3, LAMC1, LAMC2, NOS2, PLCB4, PRKACB, PRKCB, SERPINB13, SERPINB2, SERPINB3, TGFB3, TLR2, VCL]	[ACTN1, ACTN2, ACTN3, ACTN4, ADCY1, ARG1, ARG2, C8A, C8B, C8G, C9, CASP3, CD14, CD1D, COL11A1, COL11A2, COL1A1, COL1A2, COL2A1, COL3A1, COL4A1, COL4A2, COL4A4, COL4A5, COL4A6, COL5A1, COL5A2, COL5A3, CSF2, CTSG, CXCL1, FN1, GNA11, GNA14, GNA15, GNAL, GNAQ, GNAS, HSPB1, IFNG, IL10, IL12A, IL12B, IL1B, IL1R1, IL1R2, IL6, IL8, ITGAM, ITGB2, LAMA1, LAMA2, LAMA3, LAMA4, LAMA5, LAMB1, LAMB2, LAMB3, LAM…	[CASP3, CXCL1, GNA15, LAMA3, LAMB3, LAMC2, NOS2, SERPINB13, SERPINB2, SERPINB3, TLR2]	[COL1A2, COL3A1, COL4A2, COL4A4, COL4A5, COL4A6, CTSG, FN1, GNAQ, IL1B, LAMA2, LAMA4, LAMB2, LAMC1, PLCB4, PRKACB, PRKCB, TGFB3, VCL]	36.6667	63.3333	Common
KEGG:04360	KEGG_15.03.2011	Axon guidance	35	26.9231	0.0019297	0.019297	[ABL1, CDC42, CFL1, CHP2, CXCL12, DPYSL2, EFNA4, EFNA5, EPHA1, EPHA3, EPHA4, EPHA7, EPHB6, FYN, HRAS, MET, NFATC1, NFATC4, NGEF, NTN1, NTNG1, PLXNB1, PPP3CB, PPP3CC, RAC3, RND1, ROBO3, ROCK2, SEMA3B, SEMA3E, SEMA3F, SEMA4B, SEMA6C, SLIT2, SLIT3]	[ABL1, ABLIM1, ABLIM2, ABLIM3, ARHGEF12, CDC42, CDK5, CFL1, CFL2, CHP, CHP2, CXCL12, CXCR4, DCC, DPYSL2, DPYSL5, EFNA1, EFNA2, EFNA3, EFNA4, EFNA5, EFNB1, EFNB2, EFNB3, EPHA1, EPHA2, EPHA3, EPHA4, EPHA5, EPHA6, EPHA7, EPHA8, EPHB1, EPHB2, EPHB3, EPHB4, EPHB6, FES, FYN, GNAI1, GNAI2, GNAI3, GSK3B, HRAS, ITGB1, KRAS, L1CAM, LIMK1, LIMK2, LOC642132, LRRC4C, MAPK1, MAPK3, MET, NCK1, NCK2, NFAT5, NFAT…	[CDC42, CFL1, CHP2, EFNA4, EFNA5, EPHA1, EPHA4, EPHB6, HRAS, MET, NGEF, PLXNB1, RAC3, SEMA3F, SEMA4B]	[ABL1, CXCL12, DPYSL2, EPHA3, EPHA7, FYN, NFATC1, NFATC4, NTN1, NTNG1, PPP3CB, PPP3CC, RND1, ROBO3, ROCK2, SEMA3B, SEMA3E, SEMA6C, SLIT2, SLIT3]	42.8571	57.1429	Common
KEGG:00982	KEGG_15.03.2011	Drug metabolism	22	30.137	0.00292859	0.0277446	[ADH1B, ADH1C, ADH4, ADH7, ALDH3A1, ALDH3B2, AOX1, CYP2C18, CYP2C9, FMO2, GSTA1, GSTM1, GSTM3, GSTM5, GSTO2, GSTP1, GSTZ1, MAOB, MGST1, MGST3, UGT2A3, UGT2B7]	[ADH1A, ADH1B, ADH1C, ADH4, ADH5, ADH6, ADH7, ALDH1A3, ALDH3A1, ALDH3B1, ALDH3B2, AOX1, CYP1A2, CYP2A13, CYP2A6, CYP2A7, CYP2B6, CYP2C18, CYP2C19, CYP2C8, CYP2C9, CYP2D6, CYP2E1, CYP3A4, CYP3A43, CYP3A5, CYP3A7, FMO1, FMO2, FMO3, FMO4, FMO5, GSTA1, GSTA2, GSTA3, GSTA4, GSTA5, GSTK1, GSTM1, GSTM2, GSTM3, GSTM4, GSTM5, GSTO1, GSTO2, GSTP1, GSTT1, GSTT2, GSTZ1, MAOA, MAOB, MGST1, MGST2, MGST3, UGT1A…	[ADH1C, ADH7, ALDH3A1, ALDH3B2, CYP2C18, CYP2C9, GSTA1, GSTM1, GSTM3, GSTO2, GSTP1, GSTZ1, MGST1, UGT2A3, UGT2B7]	[ADH1B, ADH4, AOX1, FMO2, GSTM5, MAOB, MGST3]	68.1818	31.8182	Specific for Cluster 1
KEGG:00480	KEGG_15.03.2011	Glutathione metabolism	16	32	0.00553851	0.0474729	[GGCT, GPX2, GPX3, GSTA1, GSTM1, GSTM3, GSTM5, GSTO2, GSTP1, GSTZ1, MGST1, MGST3, ODC1, PGD, RRM1, RRM2]	[ANPEP, G6PD, GCLC, GCLM, GGCT, GGT1, GGT5, GGT6, GGT7, GPX1, GPX2, GPX3, GPX4, GPX5, GPX6, GPX7, GSR, GSS, GSTA1, GSTA2, GSTA3, GSTA4, GSTA5, GSTK1, GSTM1, GSTM2, GSTM3, GSTM4, GSTM5, GSTO1, GSTO2, GSTP1, GSTT1, GSTT2, GSTZ1, IDH1, IDH2, LAP3, MGST1, MGST2, MGST3, ODC1, OPLAH, PGD, RRM1, RRM2, RRM2B, SMS, SRM, TXNDC12]	[GGCT, GPX2, GSTA1, GSTM1, GSTM3, GSTO2, GSTP1, GSTZ1, MGST1, PGD, RRM1, RRM2]	[GPX3, GSTM5, MGST3, ODC1]	75	25	Specific for Cluster 1
KEGG:00561	KEGG_15.03.2011	Glycerolipid metabolism	16	32	0.00553851	0.0474729	[AGPAT9, AKR1B1, ALDH1B1, ALDH2, ALDH9A1, CEL, DGAT2, DGKA, DGKB, DGKZ, LIPG, LOC150763, LPL, MGLL, PPAP2B, PPAP2C]	[AGK, AGPAT1, AGPAT2, AGPAT3, AGPAT4, AGPAT6, AGPAT9, AKR1A1, AKR1B1, ALDH1B1, ALDH2, ALDH3A2, ALDH7A1, ALDH9A1, CEL, DAK, DGAT1, DGAT2, DGKA, DGKB, DGKD, DGKE, DGKG, DGKH, DGKI, DGKQ, DGKZ, GK, GK2, GLA, GLYCTK, GPAM, LIPC, LIPF, LIPG, LOC150763, LPL, LYCAT, MBOAT1, MBOAT2, MGLL, MOGAT3, PNLIP, PNLIPRP1, PNLIPRP2, PNLIPRP3, PNPLA3, PPAP2A, PPAP2B, PPAP2C]	[CEL, DGAT2, DGKA, DGKZ, LIPG, LOC150763, PPAP2C]	[AGPAT9, AKR1B1, ALDH1B1, ALDH2, ALDH9A1, DGKB, LPL, MGLL, PPAP2B]	43.75	56.25	Common
KEGG:04974	KEGG_15.03.2011	Protein digestion and absorption	23	28.3951	0.00543407	0.0489066	[ATP1A2, ATP1B1, ATP1B2, COL12A1, COL14A1, COL15A1, COL17A1, COL1A2, COL3A1, COL4A2, COL4A4, COL4A5, COL4A6, COL6A1, COL6A2, CPA3, ELN, KCNK5, PRSS3, SLC6A19, SLC8A1, SLC8A2, XPNPEP2]	[ACE2, ATP1A1, ATP1A2, ATP1A3, ATP1A4, ATP1B1, ATP1B2, ATP1B3, ATP1B4, COL11A1, COL11A2, COL12A1, COL14A1, COL15A1, COL17A1, COL18A1, COL1A1, COL1A2, COL2A1, COL3A1, COL4A1, COL4A2, COL4A4, COL4A5, COL4A6, COL5A1, COL5A2, COL5A3, COL6A1, COL6A2, COL6A3, COL6A6, COL9A1, COL9A2, COL9A3, CPA1, CPA2, CPA3, CPB1, CPB2, CTRB1, CTRL, DPP4, ELA2A, ELA3A, ELA3B, ELN, FXYD2, KCNE3, KCNJ13, KCNK5, KCNN4, KC…	[ATP1B1, COL17A1, KCNK5, PRSS3, SLC6A19]	[ATP1A2, ATP1B2, COL12A1, COL14A1, COL15A1, COL1A2, COL3A1, COL4A2, COL4A4, COL4A5, COL4A6, COL6A1, COL6A2, CPA3, ELN, SLC8A1, SLC8A2, XPNPEP2]	21.7391	78.2609	Specific for Cluster 2
